# Supplementary material
Source: publisher figshare collection journal article supplement (https://gsajournals.figshare.com/ndownloader/files/25820939)
Supplement: Supplementary file 1 [file 25820939]

## Sheet: Description
Spreadsheet Name	Description
LineInfo	Genotype identifiers (GID) and names used on Triticeae Toolbox (https://triticeaetoolbox.org/oat/) for lines used in the untargeted metabolomics study (oat diversity panel).
MetaboliteAnnotations	Annotations for 1,668 metabolites.
BLUPs	Deregressed BLUPs for each metabolite. These values were used as input for factor analysis.
Loadings	Loadings for each metabolite on the 100 latent factors.

## Sheet: LineInfo
GID	T3names
1	IL98-10145
7	IL03-2658
8	IL03-7936
9	IL04-2727
12	IL04-7077
13	IL05-1705
16	IL05-3806
17	IL05-3928
18	IL05-6223
19	IL05-8515
20	IL05-9330
22	IL05-9948
23	IL05-10069
25	IL06-3258
26	IL06-3751
29	IL86-4189
33	IL2294-8
34	IL75-5665
35	IL75-5743
37	CDC_ORRIN
38	CDC_WEAVER
39	CDC_MINSTREL
40	OT3036
41	OT3037
42	OT3045
45	OT3028
46	OT399
48	SA060605
49	SA060830
50	SA01223-02
51	SA061148
53	SA070845
54	SA070972
56	SA071405
57	SA070452
58	SA070469
59	SA070860
60	SA070781
61	SA071760
63	SA070906
64	SA071616
65	SA070655
66	SA070592
69	X8826-1
70	X8903-2
71	X8995-4
75	X9195-2
77	X9221-8
79	X9258-5
80	X9270-4
81	X9285-1
82	X9287-2
83	X9290-2
84	X9384-2
87	X9396-1
88	X9396-4
89	X9410-1
90	X9410-2
92	X9421-3
100	X9507-1
104	OA1130-1
105	OA1174-3
111	OA1228-1
112	OA1232-2
113	OA1234-1
115	OA1248-1
116	OA1250-1
117	OA1250-2
120	OA1263-2
121	OA1266-1
122	OA1268-3
124	SHERWOOD
125	SYLVA
126	OA1197-1
129	OA1180-5
130	OA1226-4
133	CILLA
140	MN08129
145	MN08230
146	MN08238
149	MN08251
151	MN08254
152	MN08260
153	MN08270
154	MN08234
155	MN08225
157	MN08253
158	MN08268
160	MN08139
161	MN06125
163	MN06108
164	MN08132
165	MN08130
166	00P06-HD1D
167	00P01-A11A4
169	LAO-882-036
172	02G31-NL7A
173	02G31-NN4B
174	02G31-NU6D
176	04P06A-CY5D
177	04P07B-GY5E
178	LAO-1134-022
179	LAO-1135-015
180	LAO-1136-014
182	BIRI
183	GN04399
185	ODAL
186	KOLBU
188	NES
189	LENA
190	GRANE
191	KAPP
193	ALLEN
194	ANDREW
197	CLINTLAND60
204	TIPPECANOE
205	TYLER
206	WOODBURN
209	9876C1-2-1-5-2-4-1
210	001A1-24-2-4-1-3
212	027A1-87-8-1
213	0219A1-84-4-4-4-4
214	053B1-95
216	059A1-2-2-4
226	02HO-139
229	97AB7767
237	HA05AB20-1
240	HA05AB29-17
244	HA05AB38-22
246	HA05AB41-38
254	MAIDA
255	ND020290
259	ND050506
260	ND050578
261	ND051037
262	ND051069
263	ND051236
264	ND051312
265	ND051467
266	ND060111
267	ND060182
268	ND060223
270	ND060342
272	ND060464
275	ND060652
278	ND061614
279	ND061813
282	ND071521
284	ND072258
285	ND080724
291	DELAIR
293	OSAGE
294	COLBERSON
296	FLORIDA500
302	FL0047-J9
303	FL0238BSB-22
304	FL03001BSB-S7
305	FL03129-AB7
306	FL03167BSB-147
308	LA02012-S-B-139-S2-B-S2-B-S2
309	LA03046SBS7-B-S1
322	TX07CS1268
323	TX07CS1402
325	TX07CS2201
327	URS-22
329	SOL-FI_CDC
330	RODGERS
332	HORIZON_270
343	DRUMMOND
344	OT380
349	ROBUST
351	BELINDA
357	JERRY
360	FREDDY
362	RANCH
363	RONALD_AC
364	CIAV6209
367	FLAEMINGSNOVA
368	LANG
370	LUTZ
373	CHERNIGOVSKIJ27B
374	HAZEL
378	CORNELLIAN
383	LENROC
384	MOHAWK
385	NEWDAK
386	NIAGARA
388	ORBIT
390	TIOGA
392	BGMN001
395	BGMN031
396	BGMN036
398	BGMN041
406	BGMN071
408	BGMN076
413	BGMN102
414	BGMN103
417	BGMN116
418	BGMN117
421	BGMN130
427	BGMN150
429	BGMN156
432	BGMN162
435	BGMN168
436	BGMN169
438	BGMN172
445	BGMN193
446	BGMN194
448	BGMN200
450	BGMN207
454	BGMN215
459	BGMN229
462	BGMN239
463	BGMN247
467	BGMN258
468	BGMN262
469	BGMN264
471	BGMN272
474	BGMN281
475	BGMN285
476	BGMN286
478	BGMN294
482	BGMN301
483	BGMN303
485	BGMN306
493	BGMN341
495	BGMN346
497	BGMN352
499	BGMN354
503	BGMN359
506	BGMN363
507	BGMN364
509	BGMN371
511	BGMN374
512	BGMN375
513	BGMN379
514	BGMN381
515	BGMN394
519	BGMN410
525	BGMN449
526	BGMN452
527	BGMN468
528	BGMN479
529	BGMN480
533	BGMN490
534	BGMN492
550	BGMN555
553	BGMN573
557	BGMN590
561	BGMN421
562	BGMN163
563	BGMN366
564	BGMN192
566	BGMN569
567	BGMN308
568	BGMN109
569	BGMN328
570	BGMN206
572	BGMN093
573	BGMN051
575	BGMN484
581	BGMN563
588	BGMN170
590	BGMN266
591	BGMN087
593	BGMN057
597	BGMN003
600	BGMN067
607	BGMN313
608	BGMN415
609	BGMN433
611	BGMN383
617	IA00020-12-3
625	IL00-7070
630	REEVES
638	SU11-1192
645	SU11-1281
647	SU11-1208
651	SU11-1188
656	SU11-1200
664	SU11-1185
677	SU11-1158
682	SU11-1153
685	SU11-1180
687	SU11-1199
688	SU11-1004
693	SU11-1155
702	SU11-1218
705	SU11-1232
714	SU11-1146
722	SU11-1161
730	SU11-1072
731	SU11-1171
733	SU11-1044
734	SU11-1221
738	SU11-1069
740	SU11-1018
742	SU11-1178
746	SU11-1144
771	SU11-1006
772	SU11-1177
773	SU11-1238
777	SU11-1282
779	SU11-1027
782	SU11-1215
783	SU11-1070
786	SU11-1228
796	SU11-1121
803	SU11-1045
821	SU11-1138
823	SU11-1046
828	SU11-1137
829	SU11-1066
833	SU11-1012
835	SU11-1003
841	SU11-1165
843	SU11-1279
846	SU11-1162
858	SU11-1136
859	SU11-1119
860	SU11-1041
865	SU11-1235
891	SU11-1002
893	SU11-1222
898	SU11-1036
900	SU11-1071
906	SU11-1077
907	SU11-1186
908	SU11-1109
911	SU11-1236
915	SU11-1244
937	SU10-033
951	M1-7
956	P1-9
976	G2-8

## Sheet: MetaboliteAnnotations
Annotations for 1,668 metabolites.
Compound	Annotation	Annotation Confidence	Kingdom_ClassyFire	Superclass_ClassyFire	Class_ClassyFire	Subclass_ClassyFire	Parent_ClassyFire
GC.03.0001	Maltose (1MEOX) (8TMS) MP	2	Organic compounds	Organic oxygen compounds	Organooxygen compounds	Carbohydrates and carbohydrate conjugates	O-glycosyl compounds
GC.03.0002	Sucrose (8TMS)	2	Organic compounds	Organic oxygen compounds	Organooxygen compounds	Carbohydrates and carbohydrate conjugates	O-glycosyl compounds
GC.03.0003	Trehalose, alpha,alpha'-, D- (8TMS)	2	Organic compounds	Organic oxygen compounds	Organooxygen compounds	Carbohydrates and carbohydrate conjugates	O-glycosyl compounds
GC.03.0004	Raffinose (11TMS)	2	Organic compounds	Organic oxygen compounds	Organooxygen compounds	Carbohydrates and carbohydrate conjugates	Oligosaccharides
GC.03.0005	Fructose (1MEOX) (5TMS) BP	2	Organic compounds	Organic oxygen compounds	Organooxygen compounds	Carbohydrates and carbohydrate conjugates	Monosaccharides
GC.03.0006	Glucose (1MEOX) (5TMS) MP	2	Organic compounds	Organic oxygen compounds	Organooxygen compounds	Carbohydrates and carbohydrate conjugates	Hexoses
GC.03.0007	Glucose (1MEOX) (5TMS) BP	2	Organic compounds	Organic oxygen compounds	Organooxygen compounds	Carbohydrates and carbohydrate conjugates	Hexoses
GC.03.0008	NA	2	NA	NA	NA	NA	NA
GC.03.0009	Fructose (1MEOX) (5TMS) MP	2	Organic compounds	Organic oxygen compounds	Organooxygen compounds	Carbohydrates and carbohydrate conjugates	Monosaccharides
GC.03.0010	Inositol, myo- (6TMS)	2	Organic compounds	Organic oxygen compounds	Organooxygen compounds	Alcohols and polyols	Cyclohexanols
GC.03.0011	C011	4	NA	NA	NA	NA	NA
GC.03.0012	NA	2	NA	NA	NA	NA	NA
GC.03.0013	Galactinol (9TMS)	2	Organic compounds	Organic oxygen compounds	Organooxygen compounds	Carbohydrates and carbohydrate conjugates	O-glycosyl compounds
GC.03.0014	Malic acid (3TMS)	2	Organic compounds	Organic acids and derivatives	Hydroxy acids and derivatives	Beta hydroxy acids and derivatives	Beta hydroxy acids and derivatives
GC.03.0015	Glycerol-3-phosphate (4TMS)	2	Organic compounds	Lipids and lipid-like molecules	Glycerophospholipids	Glycerophosphates	Glycerophosphates
GC.03.0016	Galactopyranoside, 1-O-methyl-, alpha- (4TMS)	2	Organic compounds	Organic oxygen compounds	Organooxygen compounds	Carbohydrates and carbohydrate conjugates	O-glycosyl compounds
GC.03.0017	C017	4	NA	NA	NA	NA	NA
GC.03.0018	Hydroxylamine (3TMS)	2	Inorganic compounds	Homogeneous non-metal compounds	Homogeneous other non-metal compounds	NA	Homogeneous other non-metal compounds
GC.03.0019	Asparagine (3TMS)	2	Organic compounds	Organic acids and derivatives	Carboxylic acids and derivatives	Amino acids, peptides, and analogues	Asparagine and derivatives
GC.03.0020	NA	2	NA	NA	NA	NA	NA
GC.03.0021	C021	4	NA	NA	NA	NA	NA
GC.03.0022	Octadecadienoic acid, n- (1TMS)	2	Organic compounds	Lipids and lipid-like molecules	Fatty Acyls	Lineolic acids and derivatives	Lineolic acids and derivatives
GC.03.0023	Phosphoric acid (3TMS)	2	Inorganic compounds	Homogeneous non-metal compounds	Non-metal oxoanionic compounds	Non-metal phosphates	Non-metal phosphates
GC.03.0024	Citric acid (4TMS)	2	Organic compounds	Organic acids and derivatives	Carboxylic acids and derivatives	Tricarboxylic acids and derivatives	Tricarboxylic acids and derivatives
GC.03.0025	C025	4	NA	NA	NA	NA	NA
GC.03.0026	Glutamic acid (3TMS)	2	Organic compounds	Organic acids and derivatives	Carboxylic acids and derivatives	Amino acids, peptides, and analogues	Glutamic acid and derivatives
GC.03.0027	NA	2	NA	NA	NA	NA	NA
GC.03.0029	Phosphoric acid monomethyl ester (2TMS)	2	Organic compounds	Organic acids and derivatives	Organic phosphoric acids and derivatives	Phosphate esters	Monoalkyl phosphates
GC.03.0030	Glucose (1MEOX) (5TMS) MP	2	Organic compounds	Organic oxygen compounds	Organooxygen compounds	Carbohydrates and carbohydrate conjugates	Hexoses
GC.03.0031	C031	4	NA	NA	NA	NA	NA
GC.03.0032	C032	4	NA	NA	NA	NA	NA
GC.03.0033	C033	4	NA	NA	NA	NA	NA
GC.03.0034	Glycerophosphoglycerol (5TMS)	2	Organic compounds	Organic acids and derivatives	Organic phosphoric acids and derivatives	Phosphate esters	Dialkyl phosphates
GC.03.0035	C035	4	NA	NA	NA	NA	NA
GC.03.0036	Glycerol (3TMS)	2	Organic compounds	Organic oxygen compounds	Organooxygen compounds	Carbohydrates and carbohydrate conjugates	Sugar alcohols
GC.03.0037	Glucopyranoside, 1-O-methyl-, alpha- (4TMS)	2	Organic compounds	Organic oxygen compounds	Organooxygen compounds	Carbohydrates and carbohydrate conjugates	O-glycosyl compounds
GC.03.0038	C038	4	NA	NA	NA	NA	NA
GC.03.0039	C039	4	NA	NA	NA	NA	NA
GC.03.0040	D223156	2	NA	NA	NA	NA	NA
GC.03.0041	Glycerol (3TMS)	2	Organic compounds	Organic oxygen compounds	Organooxygen compounds	Carbohydrates and carbohydrate conjugates	Sugar alcohols
GC.03.0042	NA	2	NA	NA	NA	NA	NA
GC.03.0043	Mannitol (6TMS)	2	Organic compounds	Organic oxygen compounds	Organooxygen compounds	Carbohydrates and carbohydrate conjugates	Sugar alcohols
GC.03.0044	C044	4	NA	NA	NA	NA	NA
GC.03.0046	C046	4	NA	NA	NA	NA	NA
GC.03.0047	C047	4	NA	NA	NA	NA	NA
GC.03.0048	Asparagine (4TMS) BP1	2	Organic compounds	Organic acids and derivatives	Carboxylic acids and derivatives	Amino acids, peptides, and analogues	Asparagine and derivatives
GC.03.0050	C050	4	NA	NA	NA	NA	NA
GC.03.0051	Inositol-1-phosphate, myo- (7TMS)	2	Organic compounds	Organic oxygen compounds	Organooxygen compounds	Alcohols and polyols	Inositol phosphates
GC.03.0052	Hexadecanoic acid (1TMS)	2	Organic compounds	Lipids and lipid-like molecules	Fatty Acyls	Fatty acids and conjugates	Long-chain fatty acids
GC.03.0053	C053	4	NA	NA	NA	NA	NA
GC.03.0054	C054	4	NA	NA	NA	NA	NA
GC.03.0055	Aspartic acid (3TMS)	2	Organic compounds	Organic acids and derivatives	Carboxylic acids and derivatives	Amino acids, peptides, and analogues	Aspartic acid and derivatives
GC.03.0056	C056	4	NA	NA	NA	NA	NA
GC.03.0057	Allantoin (4TMS)	2	Organic compounds	Organoheterocyclic compounds	Azoles	Imidazoles	Imidazoles
GC.03.0058	C058	4	NA	NA	NA	NA	NA
GC.03.0060	C060	4	NA	NA	NA	NA	NA
GC.03.0061	similar to Lumichrome (2MeOX)	2	NA	NA	NA	NA	NA
GC.03.0062	NA	2	NA	NA	NA	NA	NA
GC.03.0063	C063	4	NA	NA	NA	NA	NA
GC.03.0064	C064	4	NA	NA	NA	NA	NA
GC.03.0066	C066	4	NA	NA	NA	NA	NA
GC.03.0067	C067	4	NA	NA	NA	NA	NA
GC.03.0069	C069	4	NA	NA	NA	NA	NA
GC.03.0071	C071	4	NA	NA	NA	NA	NA
GC.03.0072	C072	4	NA	NA	NA	NA	NA
GC.03.0073	C073	4	NA	NA	NA	NA	NA
GC.03.0074	C074	4	NA	NA	NA	NA	NA
GC.03.0075	C075	4	NA	NA	NA	NA	NA
GC.03.0076	C076	4	NA	NA	NA	NA	NA
GC.03.0077	C077	4	NA	NA	NA	NA	NA
GC.03.0078	Tryptophan (3TMS)	2	Organic compounds	Organoheterocyclic compounds	Indoles and derivatives	Indolyl carboxylic acids and derivatives	Indolyl carboxylic acids and derivatives
GC.03.0079	C079	4	NA	NA	NA	NA	NA
GC.03.0080	C080	4	NA	NA	NA	NA	NA
GC.03.0081	C081	4	NA	NA	NA	NA	NA
GC.03.0082	C082	4	NA	NA	NA	NA	NA
GC.03.0083	NA	2	NA	NA	NA	NA	NA
GC.03.0084	C084	4	NA	NA	NA	NA	NA
GC.03.0085	C085	4	NA	NA	NA	NA	NA
GC.03.0086	Propanoic acid, 3-amino-3-(4-hydroxyphenyl)- (3TMS)	2	Organic compounds	Organic acids and derivatives	Carboxylic acids and derivatives	Amino acids, peptides, and analogues	Beta amino acids and derivatives
GC.03.0087	C087	4	NA	NA	NA	NA	NA
GC.03.0088	C088	4	NA	NA	NA	NA	NA
GC.03.0089	C089	4	NA	NA	NA	NA	NA
GC.03.0090	C090	4	NA	NA	NA	NA	NA
GC.03.0091	Octadecenoic acid, 9-(E)- (1TMS)	2	Organic compounds	Lipids and lipid-like molecules	Fatty Acyls	Fatty acids and conjugates	Long-chain fatty acids
GC.03.0092	C092	4	NA	NA	NA	NA	NA
GC.03.0094	Arabinose (1MEOX) (4TMS) MP	2	Organic compounds	Organic oxygen compounds	Organooxygen compounds	Carbohydrates and carbohydrate conjugates	Pentoses
GC.03.0095	C095	4	NA	NA	NA	NA	NA
GC.03.0096	Hydroxylamine (3TMS)	2	Inorganic compounds	Homogeneous non-metal compounds	Homogeneous other non-metal compounds	NA	Homogeneous other non-metal compounds
GC.03.0097	C097	4	NA	NA	NA	NA	NA
GC.03.0098	C098	4	NA	NA	NA	NA	NA
GC.03.0099	C099	4	NA	NA	NA	NA	NA
GC.03.0100	C100	4	NA	NA	NA	NA	NA
GC.03.0102	NA	2	NA	NA	NA	NA	NA
GC.03.0103	C103	4	NA	NA	NA	NA	NA
GC.03.0104	Asparagine [-H2O] (2TMS)	2	Organic compounds	Organic acids and derivatives	Carboxylic acids and derivatives	Amino acids, peptides, and analogues	Asparagine and derivatives
GC.03.0105	C105	4	NA	NA	NA	NA	NA
GC.03.0106	C106	4	NA	NA	NA	NA	NA
GC.03.0107	C107	4	NA	NA	NA	NA	NA
GC.03.0108	C108	4	NA	NA	NA	NA	NA
GC.03.0109	C109	4	NA	NA	NA	NA	NA
GC.03.0110	C110	4	NA	NA	NA	NA	NA
GC.03.0111	C111	4	NA	NA	NA	NA	NA
GC.03.0112	C112	4	NA	NA	NA	NA	NA
GC.03.0113	2-Imidazolidone-4-carboxylic acid (3TMS)	2	Organic compounds	Organic acids and derivatives	Carboxylic acids and derivatives	Amino acids, peptides, and analogues	Alpha amino acids and derivatives
GC.03.0114	C114	4	NA	NA	NA	NA	NA
GC.03.0115	C115	4	NA	NA	NA	NA	NA
GC.03.0117	D223156	2	NA	NA	NA	NA	NA
GC.03.0118	C118	4	NA	NA	NA	NA	NA
GC.03.0119	C119	4	NA	NA	NA	NA	NA
GC.03.0120	C120	4	NA	NA	NA	NA	NA
GC.03.0121	C121	4	NA	NA	NA	NA	NA
GC.03.0123	C123	4	NA	NA	NA	NA	NA
GC.03.0124	C124	4	NA	NA	NA	NA	NA
GC.03.0125	C125	4	NA	NA	NA	NA	NA
GC.03.0126	C126	4	NA	NA	NA	NA	NA
GC.03.0127	Allantoin (5TMS)	2	Organic compounds	Organoheterocyclic compounds	Azoles	Imidazoles	Imidazoles
GC.03.0128	C128	4	NA	NA	NA	NA	NA
GC.03.0129	Galacturonic acid (1MEOX) (5TMS) BP	2	Organic compounds	Organic oxygen compounds	Organooxygen compounds	Carbohydrates and carbohydrate conjugates	Glucuronic acid derivatives
GC.03.0130	C130	4	NA	NA	NA	NA	NA
GC.03.0131	NA	2	NA	NA	NA	NA	NA
GC.03.0132	C132	4	NA	NA	NA	NA	NA
GC.03.0133	Glucopyranose [-H20] (4TMS)	2	Organic compounds	Organic oxygen compounds	Organooxygen compounds	Carbohydrates and carbohydrate conjugates	Hexoses
GC.03.0134	NA	2	NA	NA	NA	NA	NA
GC.03.0135	C135	4	NA	NA	NA	NA	NA
GC.03.0136	Glycine (3TMS)	2	Organic compounds	Organic acids and derivatives	Carboxylic acids and derivatives	Amino acids, peptides, and analogues	Alpha amino acids
GC.03.0137	C137	4	NA	NA	NA	NA	NA
GC.03.0138	Lysine (4TMS)	2	Organic compounds	Organic acids and derivatives	Carboxylic acids and derivatives	Amino acids, peptides, and analogues	L-alpha-amino acids
GC.03.0139	C139	4	NA	NA	NA	NA	NA
GC.03.0140	Threonine (3TMS)	2	Organic compounds	Organic acids and derivatives	Carboxylic acids and derivatives	Amino acids, peptides, and analogues	Alpha amino acids
GC.03.0141	C141	4	NA	NA	NA	NA	NA
GC.03.0143	C143	4	NA	NA	NA	NA	NA
GC.03.0144	C144	4	NA	NA	NA	NA	NA
GC.03.0146	C146	4	NA	NA	NA	NA	NA
GC.03.0148	C148	4	NA	NA	NA	NA	NA
GC.03.0149	Pyridine, 2-hydroxy- (1TMS)	2	Organic compounds	Organoheterocyclic compounds	Pyridines and derivatives	Hydropyridines	Pyridinones
GC.03.0150	NA114002 (classified unknown)	2	NA	NA	NA	NA	NA
GC.03.0151	C151	4	NA	NA	NA	NA	NA
GC.03.0153	C153	4	NA	NA	NA	NA	NA
GC.03.0154	C154	4	NA	NA	NA	NA	NA
GC.03.0156	C156	4	NA	NA	NA	NA	NA
GC.03.0157	Pyroglutamic acid (2TMS)	2	Organic compounds	Organic acids and derivatives	Carboxylic acids and derivatives	Amino acids, peptides, and analogues	Proline and derivatives
GC.03.0158	Asparagine (2TMS)	2	Organic compounds	Organic acids and derivatives	Carboxylic acids and derivatives	Amino acids, peptides, and analogues	Asparagine and derivatives
GC.03.0161	C161	4	NA	NA	NA	NA	NA
GC.03.0163	NA	2	NA	NA	NA	NA	NA
GC.03.0164	C164	4	NA	NA	NA	NA	NA
GC.03.0165	C165	4	NA	NA	NA	NA	NA
GC.03.0166	C166	4	NA	NA	NA	NA	NA
GC.03.0167	C167	4	NA	NA	NA	NA	NA
GC.03.0168	C168	4	NA	NA	NA	NA	NA
GC.03.0169	C169	4	NA	NA	NA	NA	NA
GC.03.0170	NA285001 (classified unknown)	2	NA	NA	NA	NA	NA
GC.03.0171	similar to Asparagine Derivate	2	Organic compounds	Organic acids and derivatives	Carboxylic acids and derivatives	Amino acids, peptides, and analogues	Asparagine and derivatives
GC.03.0172	C172	4	NA	NA	NA	NA	NA
GC.03.0173	Uric acid (4TMS)	2	Organic compounds	Organoheterocyclic compounds	Imidazopyrimidines	Purines and purine derivatives	Xanthines
GC.03.0174	C174	4	NA	NA	NA	NA	NA
GC.03.0175	C175	4	NA	NA	NA	NA	NA
GC.03.0178	C178	4	NA	NA	NA	NA	NA
GC.03.0179	C179	4	NA	NA	NA	NA	NA
GC.03.0180	C180	4	NA	NA	NA	NA	NA
GC.03.0181	C181	4	NA	NA	NA	NA	NA
GC.03.0182	C182	4	NA	NA	NA	NA	NA
GC.03.0183	C183	4	NA	NA	NA	NA	NA
GC.03.0184	C184	4	NA	NA	NA	NA	NA
GC.03.0185	C185	4	NA	NA	NA	NA	NA
GC.03.0186	C186	4	NA	NA	NA	NA	NA
GC.03.0187	C187	4	NA	NA	NA	NA	NA
GC.03.0189	C189	4	NA	NA	NA	NA	NA
GC.03.0190	Ethanolamine (3TMS)	2	Organic compounds	Organic nitrogen compounds	Organonitrogen compounds	Amines	1,2-aminoalcohols
GC.03.0191	C191	4	NA	NA	NA	NA	NA
GC.03.0192	C192	4	NA	NA	NA	NA	NA
GC.03.0193	C193	4	NA	NA	NA	NA	NA
GC.03.0194	C194	4	NA	NA	NA	NA	NA
GC.03.0195	C195	4	NA	NA	NA	NA	NA
GC.03.0196	Tyrosine (3TMS)	2	Organic compounds	Organic acids and derivatives	Carboxylic acids and derivatives	Amino acids, peptides, and analogues	Tyrosine and derivatives
GC.03.0198	C198	4	NA	NA	NA	NA	NA
GC.03.0200	Butanoic acid, 4-amino- (3TMS)	2	Organic compounds	Organic acids and derivatives	Carboxylic acids and derivatives	Amino acids, peptides, and analogues	Gamma amino acids and derivatives
GC.03.0201	C201	4	NA	NA	NA	NA	NA
GC.03.0202	C202	4	NA	NA	NA	NA	NA
GC.03.0203	C203	4	NA	NA	NA	NA	NA
GC.03.0204	C204	4	NA	NA	NA	NA	NA
GC.03.0205	C205	4	NA	NA	NA	NA	NA
GC.03.0206	C206	4	NA	NA	NA	NA	NA
GC.03.0207	C207	4	NA	NA	NA	NA	NA
GC.03.0208	C208	4	NA	NA	NA	NA	NA
GC.03.0209	C209	4	NA	NA	NA	NA	NA
GC.03.0210	C210	4	NA	NA	NA	NA	NA
GC.03.0211	C211	4	NA	NA	NA	NA	NA
GC.03.0212	C212	4	NA	NA	NA	NA	NA
GC.03.0213	Nicotinic acid (1TMS)	2	Organic compounds	Organoheterocyclic compounds	Pyridines and derivatives	Pyridinecarboxylic acids and derivatives	Pyridinecarboxylic acids
GC.03.0215	C215	4	NA	NA	NA	NA	NA
GC.03.0216	C216	4	NA	NA	NA	NA	NA
GC.03.0217	NA	2	NA	NA	NA	NA	NA
GC.03.0218	C218	4	NA	NA	NA	NA	NA
GC.03.0220	Octadecanoic acid (1TMS)	2	Organic compounds	Lipids and lipid-like molecules	Fatty Acyls	Fatty acids and conjugates	Long-chain fatty acids
GC.03.0221	C221	4	NA	NA	NA	NA	NA
GC.03.0222	C222	4	NA	NA	NA	NA	NA
GC.03.0223	C223	4	NA	NA	NA	NA	NA
GC.03.0224	C224	4	NA	NA	NA	NA	NA
GC.03.0225	C225	4	NA	NA	NA	NA	NA
GC.03.0226	C226	4	NA	NA	NA	NA	NA
GC.03.0228	C228	4	NA	NA	NA	NA	NA
GC.03.0229	C229	4	NA	NA	NA	NA	NA
GC.03.0231	C231	4	NA	NA	NA	NA	NA
GC.03.0232	C232	4	NA	NA	NA	NA	NA
GC.03.0233	C233	4	NA	NA	NA	NA	NA
GC.03.0234	C234	4	NA	NA	NA	NA	NA
GC.03.0235	C235	4	NA	NA	NA	NA	NA
GC.03.0236	C236	4	NA	NA	NA	NA	NA
GC.03.0237	C237	4	NA	NA	NA	NA	NA
GC.03.0239	C239	4	NA	NA	NA	NA	NA
GC.03.0241	C241	4	NA	NA	NA	NA	NA
GC.03.0242	C242	4	NA	NA	NA	NA	NA
GC.03.0243	C243	4	NA	NA	NA	NA	NA
GC.03.0244	C244	4	NA	NA	NA	NA	NA
GC.03.0245	C245	4	NA	NA	NA	NA	NA
GC.03.0247	C247	4	NA	NA	NA	NA	NA
GC.03.0248	C248	4	NA	NA	NA	NA	NA
GC.03.0249	C249	4	NA	NA	NA	NA	NA
GC.03.0250	C250	4	NA	NA	NA	NA	NA
GC.03.0251	C251	4	NA	NA	NA	NA	NA
GC.03.0252	C252	4	NA	NA	NA	NA	NA
GC.03.0253	C253	4	NA	NA	NA	NA	NA
GC.03.0254	Serine (3TMS)	2	Organic compounds	Organic acids and derivatives	Carboxylic acids and derivatives	Amino acids, peptides, and analogues	Serine and derivatives
GC.03.0255	C255	4	NA	NA	NA	NA	NA
GC.03.0256	C256	4	NA	NA	NA	NA	NA
GC.03.0257	C257	4	NA	NA	NA	NA	NA
GC.03.0258	C258	4	NA	NA	NA	NA	NA
GC.03.0259	C259	4	NA	NA	NA	NA	NA
GC.03.0260	similar to Asparagine Derivate	2	Organic compounds	Organic acids and derivatives	Carboxylic acids and derivatives	Amino acids, peptides, and analogues	Asparagine and derivatives
GC.03.0261	C261	4	NA	NA	NA	NA	NA
GC.03.0263	C263	4	NA	NA	NA	NA	NA
GC.03.0264	C264	4	NA	NA	NA	NA	NA
GC.03.0265	C265	4	NA	NA	NA	NA	NA
GC.03.0267	C267	4	NA	NA	NA	NA	NA
GC.03.0269	C269	4	NA	NA	NA	NA	NA
GC.03.0270	C270	4	NA	NA	NA	NA	NA
GC.03.0271	C271	4	NA	NA	NA	NA	NA
GC.03.0272	C272	4	NA	NA	NA	NA	NA
GC.03.0274	C274	4	NA	NA	NA	NA	NA
GC.03.0276	C276	4	NA	NA	NA	NA	NA
GC.03.0277	C277	4	NA	NA	NA	NA	NA
GC.03.0279	C279	4	NA	NA	NA	NA	NA
GC.03.0280	C280	4	NA	NA	NA	NA	NA
GC.03.0281	C281	4	NA	NA	NA	NA	NA
GC.03.0282	C282	4	NA	NA	NA	NA	NA
GC.03.0283	C283	4	NA	NA	NA	NA	NA
GC.03.0284	C284	4	NA	NA	NA	NA	NA
GC.03.0285	C285	4	NA	NA	NA	NA	NA
GC.03.0286	Fumaric acid (2TMS)	2	Organic compounds	Organic acids and derivatives	Carboxylic acids and derivatives	Dicarboxylic acids and derivatives	Dicarboxylic acids and derivatives
GC.03.0287	C287	4	NA	NA	NA	NA	NA
GC.03.0288	C288	4	NA	NA	NA	NA	NA
GC.03.0289	C289	4	NA	NA	NA	NA	NA
GC.03.0290	C290	4	NA	NA	NA	NA	NA
GC.03.0291	C291	4	NA	NA	NA	NA	NA
GC.03.0292	C292	4	NA	NA	NA	NA	NA
GC.03.0294	C294	4	NA	NA	NA	NA	NA
GC.03.0295	C295	4	NA	NA	NA	NA	NA
GC.03.0296	C296	4	NA	NA	NA	NA	NA
GC.03.0297	C297	4	NA	NA	NA	NA	NA
GC.03.0298	C298	4	NA	NA	NA	NA	NA
GC.03.0299	C299	4	NA	NA	NA	NA	NA
GC.03.0300	C300	4	NA	NA	NA	NA	NA
GC.03.0301	C301	4	NA	NA	NA	NA	NA
GC.03.0303	C303	4	NA	NA	NA	NA	NA
GC.03.0304	C304	4	NA	NA	NA	NA	NA
GC.03.0305	C305	4	NA	NA	NA	NA	NA
GC.03.0306	C306	4	NA	NA	NA	NA	NA
GC.03.0307	C307	4	NA	NA	NA	NA	NA
GC.03.0310	C310	4	NA	NA	NA	NA	NA
GC.03.0311	C311	4	NA	NA	NA	NA	NA
GC.03.0312	C312	4	NA	NA	NA	NA	NA
GC.03.0313	C313	4	NA	NA	NA	NA	NA
GC.03.0314	Pyruvic acid (1MEOX) (1TMS)	2	Organic compounds	Organic acids and derivatives	Keto acids and derivatives	Alpha-keto acids and derivatives	Alpha-keto acids and derivatives
GC.03.0316	C316	4	NA	NA	NA	NA	NA
GC.03.0317	C317	4	NA	NA	NA	NA	NA
GC.03.0318	C318	4	NA	NA	NA	NA	NA
GC.03.0320	C320	4	NA	NA	NA	NA	NA
GC.03.0321	NA	2	NA	NA	NA	NA	NA
GC.03.0322	C322	4	NA	NA	NA	NA	NA
GC.03.0323	C323	4	NA	NA	NA	NA	NA
GC.03.0324	C324	4	NA	NA	NA	NA	NA
GC.03.0325	C325	4	NA	NA	NA	NA	NA
GC.03.0326	C326	4	NA	NA	NA	NA	NA
GC.03.0327	C327	4	NA	NA	NA	NA	NA
GC.03.0328	C328	4	NA	NA	NA	NA	NA
GC.03.0330	C330	4	NA	NA	NA	NA	NA
GC.03.0331	Phenylalanine (2TMS)	2	Organic compounds	Organic acids and derivatives	Carboxylic acids and derivatives	Amino acids, peptides, and analogues	Phenylalanine and derivatives
GC.03.0332	C332	4	NA	NA	NA	NA	NA
GC.03.0333	C333	4	NA	NA	NA	NA	NA
GC.03.0334	C334	4	NA	NA	NA	NA	NA
GC.03.0336	Trigonelline (1TMS)	2	NA	NA	NA	NA	NA
GC.03.0338	C338	4	NA	NA	NA	NA	NA
GC.03.0340	C340	4	NA	NA	NA	NA	NA
GC.03.0341	C341	4	NA	NA	NA	NA	NA
GC.03.0342	C342	4	NA	NA	NA	NA	NA
GC.03.0343	C343	4	NA	NA	NA	NA	NA
GC.03.0344	C344	4	NA	NA	NA	NA	NA
GC.03.0345	C345	4	NA	NA	NA	NA	NA
GC.03.0347	C347	4	NA	NA	NA	NA	NA
GC.03.0348	C348	4	NA	NA	NA	NA	NA
GC.03.0350	C350	4	NA	NA	NA	NA	NA
GC.03.0351	C351	4	NA	NA	NA	NA	NA
GC.03.0352	C352	4	NA	NA	NA	NA	NA
GC.03.0353	C353	4	NA	NA	NA	NA	NA
GC.03.0354	C354	4	NA	NA	NA	NA	NA
GC.03.0355	C355	4	NA	NA	NA	NA	NA
GC.03.0356	C356	4	NA	NA	NA	NA	NA
GC.03.0358	C358	4	NA	NA	NA	NA	NA
GC.03.0359	C359	4	NA	NA	NA	NA	NA
GC.03.0360	C360	4	NA	NA	NA	NA	NA
GC.03.0362	C362	4	NA	NA	NA	NA	NA
GC.03.0364	C364	4	NA	NA	NA	NA	NA
GC.03.0365	C365	4	NA	NA	NA	NA	NA
GC.03.0366	C366	4	NA	NA	NA	NA	NA
GC.03.0367	C367	4	NA	NA	NA	NA	NA
GC.03.0368	C368	4	NA	NA	NA	NA	NA
GC.03.0369	C369	4	NA	NA	NA	NA	NA
GC.03.0371	C371	4	NA	NA	NA	NA	NA
GC.03.0372	C372	4	NA	NA	NA	NA	NA
GC.03.0373	C373	4	NA	NA	NA	NA	NA
GC.03.0375	C375	4	NA	NA	NA	NA	NA
GC.03.0377	C377	4	NA	NA	NA	NA	NA
GC.03.0378	C378	4	NA	NA	NA	NA	NA
GC.03.0379	C379	4	NA	NA	NA	NA	NA
GC.03.0380	C380	4	NA	NA	NA	NA	NA
GC.03.0381	C381	4	NA	NA	NA	NA	NA
GC.03.0382	C382	4	NA	NA	NA	NA	NA
GC.03.0383	C383	4	NA	NA	NA	NA	NA
GC.03.0384	C384	4	NA	NA	NA	NA	NA
GC.03.0385	C385	4	NA	NA	NA	NA	NA
GC.03.0386	Guanine (3TMS)	2	Organic compounds	Organoheterocyclic compounds	Imidazopyrimidines	Purines and purine derivatives	Purines and purine derivatives
GC.03.0387	C387	4	NA	NA	NA	NA	NA
GC.03.0388	C388	4	NA	NA	NA	NA	NA
GC.03.0389	Alanine (3TMS)	2	Organic compounds	Organic acids and derivatives	Carboxylic acids and derivatives	Amino acids, peptides, and analogues	Alanine and derivatives
GC.03.0390	Thymine (2TMS)	2	Organic compounds	Organoheterocyclic compounds	Diazines	Pyrimidines and pyrimidine derivatives	Hydroxypyrimidines
GC.03.0391	C391	4	NA	NA	NA	NA	NA
GC.03.0392	C392	4	NA	NA	NA	NA	NA
GC.03.0393	C393	4	NA	NA	NA	NA	NA
GC.03.0394	C394	4	NA	NA	NA	NA	NA
GC.03.0395	C395	4	NA	NA	NA	NA	NA
GC.03.0397	C397	4	NA	NA	NA	NA	NA
GC.03.0398	C398	4	NA	NA	NA	NA	NA
GC.03.0399	Proline [+CO2] (2TMS)	2	Organic compounds	Organic acids and derivatives	Carboxylic acids and derivatives	Amino acids, peptides, and analogues	Proline and derivatives
GC.03.0400	C400	4	NA	NA	NA	NA	NA
GC.03.0401	C401	4	NA	NA	NA	NA	NA
GC.03.0402	C402	4	NA	NA	NA	NA	NA
GC.03.0403	C403	4	NA	NA	NA	NA	NA
GC.03.0404	C404	4	NA	NA	NA	NA	NA
GC.03.0405	C405	4	NA	NA	NA	NA	NA
GC.03.0408	similar to Histidine (4TMS)	2	NA	NA	NA	NA	NA
GC.03.0409	C409	4	NA	NA	NA	NA	NA
GC.03.0410	C410	4	NA	NA	NA	NA	NA
GC.03.0411	C411	4	NA	NA	NA	NA	NA
GC.03.0412	C412	4	NA	NA	NA	NA	NA
GC.03.0413	C413	4	NA	NA	NA	NA	NA
GC.03.0414	C414	4	NA	NA	NA	NA	NA
GC.03.0415	C415	4	NA	NA	NA	NA	NA
GC.03.0416	C416	4	NA	NA	NA	NA	NA
GC.03.0417	C417	4	NA	NA	NA	NA	NA
GC.03.0418	C418	4	NA	NA	NA	NA	NA
GC.03.0419	C419	4	NA	NA	NA	NA	NA
GC.03.0420	C420	4	NA	NA	NA	NA	NA
GC.03.0421	C421	4	NA	NA	NA	NA	NA
GC.03.0424	C424	4	NA	NA	NA	NA	NA
GC.03.0425	C425	4	NA	NA	NA	NA	NA
GC.03.0430	C430	4	NA	NA	NA	NA	NA
GC.03.0431	C431	4	NA	NA	NA	NA	NA
GC.03.0433	C433	4	NA	NA	NA	NA	NA
GC.03.0434	C434	4	NA	NA	NA	NA	NA
GC.03.0437	C437	4	NA	NA	NA	NA	NA
GC.03.0439	C439	4	NA	NA	NA	NA	NA
GC.03.0441	C441	4	NA	NA	NA	NA	NA
GC.03.0442	C442	4	NA	NA	NA	NA	NA
GC.03.0443	C443	4	NA	NA	NA	NA	NA
GC.03.0444	C444	4	NA	NA	NA	NA	NA
GC.03.0445	C445	4	NA	NA	NA	NA	NA
GC.03.0446	C446	4	NA	NA	NA	NA	NA
GC.03.0449	C449	4	NA	NA	NA	NA	NA
GC.03.0450	C450	4	NA	NA	NA	NA	NA
GC.03.0452	C452	4	NA	NA	NA	NA	NA
GC.03.0453	C453	4	NA	NA	NA	NA	NA
GC.03.0455	C455	4	NA	NA	NA	NA	NA
GC.03.0456	C456	4	NA	NA	NA	NA	NA
GC.03.0457	C457	4	NA	NA	NA	NA	NA
GC.03.0458	C458	4	NA	NA	NA	NA	NA
GC.03.0460	C460	4	NA	NA	NA	NA	NA
GC.03.0462	C462	4	NA	NA	NA	NA	NA
GC.03.0463	C463	4	NA	NA	NA	NA	NA
GC.03.0464	C464	4	NA	NA	NA	NA	NA
GC.03.0465	C465	4	NA	NA	NA	NA	NA
GC.03.0466	C466	4	NA	NA	NA	NA	NA
GC.03.0467	C467	4	NA	NA	NA	NA	NA
GC.03.0468	C468	4	NA	NA	NA	NA	NA
GC.03.0469	C469	4	NA	NA	NA	NA	NA
GC.03.0470	Tricosanoic acid, n- (1TMS)	2	Organic compounds	Lipids and lipid-like molecules	Fatty Acyls	Fatty acids and conjugates	Very long-chain fatty acids
GC.03.0471	Guanosine, 2'-deoxy- (4TMS)	2	Organic compounds	Nucleosides, nucleotides, and analogues	Purine nucleosides	Purine 2'-deoxyribonucleosides	Purine 2'-deoxyribonucleosides
GC.03.0473	C473	4	NA	NA	NA	NA	NA
GC.03.0474	C474	4	NA	NA	NA	NA	NA
GC.03.0476	C476	4	NA	NA	NA	NA	NA
GC.03.0477	C477	4	NA	NA	NA	NA	NA
GC.03.0478	C478	4	NA	NA	NA	NA	NA
GC.03.0480	C480	4	NA	NA	NA	NA	NA
GC.03.0481	C481	4	NA	NA	NA	NA	NA
GC.03.0482	C482	4	NA	NA	NA	NA	NA
GC.03.0483	C483	4	NA	NA	NA	NA	NA
GC.03.0484	C484	4	NA	NA	NA	NA	NA
GC.03.0486	C486	4	NA	NA	NA	NA	NA
GC.03.0488	C488	4	NA	NA	NA	NA	NA
GC.03.0491	C491	4	NA	NA	NA	NA	NA
GC.03.0492	C492	4	NA	NA	NA	NA	NA
GC.03.0493	C493	4	NA	NA	NA	NA	NA
GC.03.0494	C494	4	NA	NA	NA	NA	NA
GC.03.0495	C495	4	NA	NA	NA	NA	NA
GC.03.0496	C496	4	NA	NA	NA	NA	NA
GC.03.0498	C498	4	NA	NA	NA	NA	NA
GC.03.0499	C499	4	NA	NA	NA	NA	NA
GC.03.0500	C500	4	NA	NA	NA	NA	NA
GC.03.0501	C501	4	NA	NA	NA	NA	NA
GC.03.0502	C502	4	NA	NA	NA	NA	NA
GC.03.0503	C503	4	NA	NA	NA	NA	NA
GC.03.0504	C504	4	NA	NA	NA	NA	NA
GC.03.0505	C505	4	NA	NA	NA	NA	NA
GC.03.0506	C506	4	NA	NA	NA	NA	NA
GC.03.0509	C509	4	NA	NA	NA	NA	NA
GC.03.0510	C510	4	NA	NA	NA	NA	NA
GC.03.0511	C511	4	NA	NA	NA	NA	NA
GC.03.0514	C514	4	NA	NA	NA	NA	NA
GC.03.0518	C518	4	NA	NA	NA	NA	NA
GC.03.0519	C519	4	NA	NA	NA	NA	NA
GC.03.0520	C520	4	NA	NA	NA	NA	NA
GC.03.0521	C521	4	NA	NA	NA	NA	NA
GC.03.0522	C522	4	NA	NA	NA	NA	NA
GC.03.0525	C525	4	NA	NA	NA	NA	NA
GC.03.0526	C526	4	NA	NA	NA	NA	NA
GC.03.0528	C528	4	NA	NA	NA	NA	NA
GC.03.0530	C530	4	NA	NA	NA	NA	NA
GC.03.0532	C532	4	NA	NA	NA	NA	NA
GC.03.0533	C533	4	NA	NA	NA	NA	NA
GC.03.0535	C535	4	NA	NA	NA	NA	NA
GC.03.0537	C537	4	NA	NA	NA	NA	NA
GC.03.0539	C539	4	NA	NA	NA	NA	NA
GC.03.0540	C540	4	NA	NA	NA	NA	NA
GC.03.0542	C542	4	NA	NA	NA	NA	NA
GC.03.0543	C543	4	NA	NA	NA	NA	NA
GC.03.0544	C544	4	NA	NA	NA	NA	NA
GC.03.0549	C549	4	NA	NA	NA	NA	NA
GC.03.0550	C550	4	NA	NA	NA	NA	NA
GC.03.0551	C551	4	NA	NA	NA	NA	NA
GC.03.0553	C553	4	NA	NA	NA	NA	NA
GC.03.0554	C554	4	NA	NA	NA	NA	NA
GC.03.0555	C555	4	NA	NA	NA	NA	NA
GC.03.0556	C556	4	NA	NA	NA	NA	NA
GC.03.0557	C557	4	NA	NA	NA	NA	NA
GC.03.0559	C559	4	NA	NA	NA	NA	NA
GC.03.0561	C561	4	NA	NA	NA	NA	NA
GC.03.0562	C562	4	NA	NA	NA	NA	NA
GC.03.0564	C564	4	NA	NA	NA	NA	NA
GC.03.0567	C567	4	NA	NA	NA	NA	NA
GC.03.0573	C573	4	NA	NA	NA	NA	NA
GC.03.0576	C576	4	NA	NA	NA	NA	NA
GC.03.0577	C577	4	NA	NA	NA	NA	NA
GC.03.0580	C580	4	NA	NA	NA	NA	NA
GC.03.0581	C581	4	NA	NA	NA	NA	NA
GC.03.0582	C582	4	NA	NA	NA	NA	NA
GC.03.0584	C584	4	NA	NA	NA	NA	NA
GC.03.0589	C589	4	NA	NA	NA	NA	NA
GC.03.0591	C591	4	NA	NA	NA	NA	NA
GC.03.0592	C592	4	NA	NA	NA	NA	NA
GC.03.0593	C593	4	NA	NA	NA	NA	NA
GC.03.0594	C594	4	NA	NA	NA	NA	NA
GC.03.0595	C595	4	NA	NA	NA	NA	NA
GC.03.0596	C596	4	NA	NA	NA	NA	NA
GC.03.0598	C598	4	NA	NA	NA	NA	NA
GC.03.0600	C600	4	NA	NA	NA	NA	NA
GC.03.0601	C601	4	NA	NA	NA	NA	NA
GC.03.0603	C603	4	NA	NA	NA	NA	NA
GC.03.0607	C607	4	NA	NA	NA	NA	NA
GC.03.0609	C609	4	NA	NA	NA	NA	NA
GC.03.0610	C610	4	NA	NA	NA	NA	NA
GC.03.0612	C612	4	NA	NA	NA	NA	NA
GC.03.0613	C613	4	NA	NA	NA	NA	NA
GC.03.0616	C616	4	NA	NA	NA	NA	NA
GC.03.0623	C623	4	NA	NA	NA	NA	NA
GC.03.0626	C626	4	NA	NA	NA	NA	NA
GC.03.0627	C627	4	NA	NA	NA	NA	NA
GC.03.0628	C628	4	NA	NA	NA	NA	NA
GC.03.0629	C629	4	NA	NA	NA	NA	NA
GC.03.0632	C632	4	NA	NA	NA	NA	NA
GC.03.0634	C634	4	NA	NA	NA	NA	NA
GC.03.0635	C635	4	NA	NA	NA	NA	NA
GC.03.0637	C637	4	NA	NA	NA	NA	NA
GC.03.0641	C641	4	NA	NA	NA	NA	NA
GC.03.0642	C642	4	NA	NA	NA	NA	NA
GC.03.0643	C643	4	NA	NA	NA	NA	NA
GC.03.0644	C644	4	NA	NA	NA	NA	NA
GC.03.0645	Uridine (4TMS)	2	Organic compounds	Nucleosides, nucleotides, and analogues	Pyrimidine nucleosides	NA	Pyrimidine nucleosides
GC.03.0646	C646	4	NA	NA	NA	NA	NA
GC.03.0647	C647	4	NA	NA	NA	NA	NA
GC.03.0648	C648	4	NA	NA	NA	NA	NA
GC.03.0649	C649	4	NA	NA	NA	NA	NA
GC.03.0650	C650	4	NA	NA	NA	NA	NA
GC.03.0651	C651	4	NA	NA	NA	NA	NA
GC.03.0652	C652	4	NA	NA	NA	NA	NA
GC.03.0653	C653	4	NA	NA	NA	NA	NA
GC.03.0658	C658	4	NA	NA	NA	NA	NA
GC.03.0659	C659	4	NA	NA	NA	NA	NA
GC.03.0661	C661	4	NA	NA	NA	NA	NA
GC.03.0662	C662	4	NA	NA	NA	NA	NA
GC.03.0663	C663	4	NA	NA	NA	NA	NA
GC.03.0666	C666	4	NA	NA	NA	NA	NA
GC.03.0667	C667	4	NA	NA	NA	NA	NA
GC.03.0670	C670	4	NA	NA	NA	NA	NA
GC.03.0671	C671	4	NA	NA	NA	NA	NA
GC.03.0672	C672	4	NA	NA	NA	NA	NA
GC.03.0673	C673	4	NA	NA	NA	NA	NA
GC.03.0674	C674	4	NA	NA	NA	NA	NA
GC.03.0677	C677	4	NA	NA	NA	NA	NA
GC.03.0680	C680	4	NA	NA	NA	NA	NA
GC.03.0682	C682	4	NA	NA	NA	NA	NA
GC.03.0683	C683	4	NA	NA	NA	NA	NA
GC.03.0684	C684	4	NA	NA	NA	NA	NA
GC.03.0685	C685	4	NA	NA	NA	NA	NA
GC.03.0688	C688	4	NA	NA	NA	NA	NA
GC.03.0689	C689	4	NA	NA	NA	NA	NA
GC.03.0690	C690	4	NA	NA	NA	NA	NA
GC.03.0692	C692	4	NA	NA	NA	NA	NA
GC.03.0693	C693	4	NA	NA	NA	NA	NA
GC.03.0696	C696	4	NA	NA	NA	NA	NA
GC.03.0698	C698	4	NA	NA	NA	NA	NA
GC.03.0699	C699	4	NA	NA	NA	NA	NA
GC.03.0702	C702	4	NA	NA	NA	NA	NA
GC.03.0703	Naringenin (1MEOX) (3TMS)	2	Organic compounds	Phenylpropanoids and polyketides	Flavonoids	Flavans	Flavanones
GC.03.0705	C705	4	NA	NA	NA	NA	NA
GC.03.0707	C707	4	NA	NA	NA	NA	NA
GC.03.0708	C708	4	NA	NA	NA	NA	NA
GC.03.0709	C709	4	NA	NA	NA	NA	NA
GC.03.0710	C710	4	NA	NA	NA	NA	NA
GC.03.0713	C713	4	NA	NA	NA	NA	NA
GC.03.0714	C714	4	NA	NA	NA	NA	NA
GC.03.0715	C715	4	NA	NA	NA	NA	NA
GC.03.0716	C716	4	NA	NA	NA	NA	NA
GC.03.0717	C717	4	NA	NA	NA	NA	NA
GC.03.0718	C718	4	NA	NA	NA	NA	NA
GC.03.0720	C720	4	NA	NA	NA	NA	NA
GC.03.0722	C722	4	NA	NA	NA	NA	NA
GC.03.0723	C723	4	NA	NA	NA	NA	NA
GC.03.0725	C725	4	NA	NA	NA	NA	NA
GC.03.0726	C726	4	NA	NA	NA	NA	NA
GC.03.0727	C727	4	NA	NA	NA	NA	NA
GC.03.0728	C728	4	NA	NA	NA	NA	NA
GC.03.0729	Ferulic acid, cis- (2TMS)	2	Organic compounds	Phenylpropanoids and polyketides	Cinnamic acids and derivatives	Hydroxycinnamic acids and derivatives	Hydroxycinnamic acids
GC.03.0730	C730	4	NA	NA	NA	NA	NA
GC.03.0731	C731	4	NA	NA	NA	NA	NA
GC.03.0733	C733	4	NA	NA	NA	NA	NA
GC.03.0734	C734	4	NA	NA	NA	NA	NA
GC.03.0735	C735	4	NA	NA	NA	NA	NA
GC.03.0736	C736	4	NA	NA	NA	NA	NA
GC.03.0737	C737	4	NA	NA	NA	NA	NA
GC.03.0738	C738	4	NA	NA	NA	NA	NA
GC.03.0739	C739	4	NA	NA	NA	NA	NA
GC.03.0741	C741	4	NA	NA	NA	NA	NA
GC.03.0743	C743	4	NA	NA	NA	NA	NA
GC.03.0745	C745	4	NA	NA	NA	NA	NA
GC.03.0746	C746	4	NA	NA	NA	NA	NA
GC.03.0747	C747	4	NA	NA	NA	NA	NA
GC.03.0749	C749	4	NA	NA	NA	NA	NA
GC.03.0751	C751	4	NA	NA	NA	NA	NA
GC.03.0754	C754	4	NA	NA	NA	NA	NA
GC.03.0755	C755	4	NA	NA	NA	NA	NA
GC.03.0756	C756	4	NA	NA	NA	NA	NA
GC.03.0757	C757	4	NA	NA	NA	NA	NA
GC.03.0759	C759	4	NA	NA	NA	NA	NA
GC.03.0761	C761	4	NA	NA	NA	NA	NA
GC.03.0762	C762	4	NA	NA	NA	NA	NA
GC.03.0763	C763	4	NA	NA	NA	NA	NA
GC.03.0764	C764	4	NA	NA	NA	NA	NA
GC.03.0765	C765	4	NA	NA	NA	NA	NA
GC.03.0766	C766	4	NA	NA	NA	NA	NA
GC.03.0768	C768	4	NA	NA	NA	NA	NA
GC.03.0769	C769	4	NA	NA	NA	NA	NA
GC.03.0770	C770	4	NA	NA	NA	NA	NA
GC.03.0772	C772	4	NA	NA	NA	NA	NA
GC.03.0773	C773	4	NA	NA	NA	NA	NA
GC.03.0774	C774	4	NA	NA	NA	NA	NA
GC.03.0775	C775	4	NA	NA	NA	NA	NA
GC.03.0776	C776	4	NA	NA	NA	NA	NA
GC.03.0778	C778	4	NA	NA	NA	NA	NA
GC.03.0779	C779	4	NA	NA	NA	NA	NA
GC.03.0780	C780	4	NA	NA	NA	NA	NA
GC.03.0781	C781	4	NA	NA	NA	NA	NA
GC.03.0782	C782	4	NA	NA	NA	NA	NA
GC.03.0783	C783	4	NA	NA	NA	NA	NA
GC.03.0784	C784	4	NA	NA	NA	NA	NA
GC.03.0786	C786	4	NA	NA	NA	NA	NA
GC.03.0787	C787	4	NA	NA	NA	NA	NA
GC.03.0788	C788	4	NA	NA	NA	NA	NA
GC.03.0789	C789	4	NA	NA	NA	NA	NA
GC.03.0790	C790	4	NA	NA	NA	NA	NA
GC.03.0791	C791	4	NA	NA	NA	NA	NA
GC.03.0792	C792	4	NA	NA	NA	NA	NA
GC.03.0793	C793	4	NA	NA	NA	NA	NA
LC.03.0001	Avenacoside A	2	Organic compounds	Lipids and lipid-like molecules	Steroids and steroid derivatives	Steroidal glycosides	Steroidal saponins
LC.03.0002	Gingerglycolipid B	2	NA	NA	NA	NA	NA
LC.03.0003	DG(36:4)	2	Organic compounds	Lipids and lipid-like molecules	Fatty Acyls	Lineolic acids and derivatives	Lineolic acids and derivatives
LC.03.0004	(-)-Aflastatin B;Aflastatin B	2	Organic compounds	Lipids and lipid-like molecules	Prenol lipids	Sesterterpenoids	Sesterterpenoids
LC.03.0005	UNPD125306	2	NA	NA	NA	NA	NA
LC.03.0006	Glycerol 2-(9Z,12Z-octadecadienoate) 1-hexadecanoate 3-O-[alpha-D-galactopyranosyl-(1->6)-beta-D-galactopyranoside]	2	NA	NA	NA	NA	NA
LC.03.0007	1-18:2-2-18:2-digalactosyldiacylglycerol	2	Organic compounds	Lipids and lipid-like molecules	Glycerolipids	Glycosylglycerols	Glycosyldiacylglycerols
LC.03.0008	LysoPC(18:1(9Z))	2	NA	NA	NA	NA	NA
LC.03.0009	LPE(18:2)	2	Organic compounds	Lipids and lipid-like molecules	Glycerophospholipids	Glycerophosphoethanolamines	2-acyl-sn-glycero-3-phosphoethanolamines
LC.03.0010	C6H4OS5	3	NA	NA	NA	NA	NA
LC.03.0011	LPC(18:2)	2	Organic compounds	Lipids and lipid-like molecules	Glycerophospholipids	Glycerophosphocholines	1-acyl-sn-glycero-3-phosphocholines
LC.03.0012	LysoPC(16:0)	2	Organic compounds	Lipids and lipid-like molecules	Glycerophospholipids	Glycerophosphocholines	1-acyl-sn-glycero-3-phosphocholines
LC.03.0013	C29H93N2O9PS20	3	NA	NA	NA	NA	NA
LC.03.0014	(R)-2-Hydroxysterculic acid	2	Organic compounds	Lipids and lipid-like molecules	Fatty Acyls	Fatty alcohols	Fatty alcohols
LC.03.0015	1-Kestose	2	Organic compounds	Organic oxygen compounds	Organooxygen compounds	Carbohydrates and carbohydrate conjugates	Oligosaccharides
LC.03.0016	1-18:1-2-16:0-digalactosyldiacylglycerol	2	Organic compounds	Lipids and lipid-like molecules	Glycerolipids	Glycosylglycerols	Glycosyldiacylglycerols
LC.03.0017	UNPD121923	2	Organic compounds	Lipids and lipid-like molecules	Glycerolipids	Glycosylglycerols	Glycosyldiacylglycerols
LC.03.0018	C54H130N28O3	3	NA	NA	NA	NA	NA
LC.03.0019	Melongoside K	2	Organic compounds	Lipids and lipid-like molecules	Steroids and steroid derivatives	Steroidal glycosides	Steroidal saponins
LC.03.0020	Ardisiaquinone E	2	Organic compounds	Benzenoids	Phenols	Benzenediols	Resorcinols
LC.03.0021	PC(36:4)	2	Organic compounds	Lipids and lipid-like molecules	Glycerophospholipids	Glycerophosphocholines	Phosphatidylcholines
LC.03.0022	UNPD107409	2	NA	NA	NA	NA	NA
LC.03.0023	Arborcandin A	2	Organic compounds	Organic acids and derivatives	Peptidomimetics	Hybrid peptides	Hybrid peptides
LC.03.0024	Hainaneoside A	2	Organic compounds	Lipids and lipid-like molecules	Steroids and steroid derivatives	Steroidal glycosides	Steroidal glycosides
LC.03.0025	C9HO3PS	3	NA	NA	NA	NA	NA
LC.03.0026	Hyperibone L	2	NA	NA	NA	NA	NA
LC.03.0027	TG(18:1(9Z)/18:1(9Z)/18:2(9Z,12Z))	2	Organic compounds	Lipids and lipid-like molecules	Glycerolipids	Triradylcglycerols	Triacylglycerols
LC.03.0028	DG(36:3)	2	Organic compounds	Lipids and lipid-like molecules	Fatty Acyls	Lineolic acids and derivatives	Lineolic acids and derivatives
LC.03.0029	DG(36:3)	2	Organic compounds	Lipids and lipid-like molecules	Fatty Acyls	Lineolic acids and derivatives	Lineolic acids and derivatives
LC.03.0031	C13H50N24O24P6S3	3	NA	NA	NA	NA	NA
LC.03.0032	5-[1-[cyclohexyl(oxo)methyl]-3-piperidinyl]-3-[(2,5-dimethylphenyl)methyl]-2H-triazolo[4,5-d]pyrimidin-7-one__1	2	Organic compounds	Organoheterocyclic compounds	Triazolopyrimidines	NA	Triazolopyrimidines
LC.03.0033	TG(16:0/18:1(9Z)/18:1(9Z))	2	Organic compounds	Lipids and lipid-like molecules	Glycerolipids	Triradylcglycerols	Triacylglycerols
LC.03.0034	Capsoside A	2	Organic compounds	Lipids and lipid-like molecules	Glycerolipids	Glycosylglycerols	Glycosyldiacylglycerols
LC.03.0036	C61H100O13P2__1	3	NA	NA	NA	NA	NA
LC.03.0037	Surculoside C;(-)-Surculoside C	2	NA	NA	NA	NA	NA
LC.03.0038	5-[1-[cyclohexyl(oxo)methyl]-3-piperidinyl]-3-[(2,5-dimethylphenyl)methyl]-2H-triazolo[4,5-d]pyrimidin-7-one__2	2	Organic compounds	Organoheterocyclic compounds	Triazolopyrimidines	NA	Triazolopyrimidines
LC.03.0039	LPC(14:0)	2	Organic compounds	Lipids and lipid-like molecules	Glycerophospholipids	Glycerophosphocholines	1-acyl-sn-glycero-3-phosphocholines
LC.03.0040	Gingerglycolipid C	2	Organic compounds	Lipids and lipid-like molecules	Glycerolipids	Glycosylglycerols	Glycosylmonoacylglycerols
LC.03.0041	C4HN2O4PS2	3	NA	NA	NA	NA	NA
LC.03.0042	PC(34:2)	2	Organic compounds	Lipids and lipid-like molecules	Glycerophospholipids	Glycerophosphocholines	Phosphatidylcholines
LC.03.0043	Hexacosyl trans-ferulate;n-Hexacosyl trans-ferulate__1	2	Organic compounds	Phenylpropanoids and polyketides	Cinnamic acids and derivatives	Hydroxycinnamic acids and derivatives	Coumaric acids and derivatives
LC.03.0044	DG(34:2)	2	Organic compounds	Lipids and lipid-like molecules	Fatty Acyls	Lineolic acids and derivatives	Lineolic acids and derivatives
LC.03.0045	Deltonin	2	Organic compounds	Lipids and lipid-like molecules	Steroids and steroid derivatives	Steroidal glycosides	Steroidal saponins
LC.03.0046	Sucrose	2	Organic compounds	Organic oxygen compounds	Organooxygen compounds	Carbohydrates and carbohydrate conjugates	O-glycosyl compounds
LC.03.0048	Thymine	2	Organic compounds	Organoheterocyclic compounds	Diazines	Pyrimidines and pyrimidine derivatives	Hydroxypyrimidines
LC.03.0049	DG(36:2)	2	Organic compounds	Lipids and lipid-like molecules	Glycerolipids	Diradylglycerols	1,2-diacylglycerols
LC.03.0050	UNPD214604	2	Organic compounds	Lipids and lipid-like molecules	Steroids and steroid derivatives	Steroidal glycosides	Steroidal saponins
LC.03.0051	Acutanguloside C;(+)-Acutanguloside C	2	Organic compounds	Lipids and lipid-like molecules	Prenol lipids	Terpene glycosides	Triterpene saponins
LC.03.0052	26-Desglucoavenacoside A	2	Organic compounds	Lipids and lipid-like molecules	Steroids and steroid derivatives	Steroidal glycosides	Steroidal saponins
LC.03.0053	TG(16:0/16:1(9Z)/20:4(5Z,8Z,11Z,14Z))	2	Organic compounds	Lipids and lipid-like molecules	Glycerolipids	Triradylcglycerols	Triacylglycerols
LC.03.0054	PE(36:4)	2	Organic compounds	Lipids and lipid-like molecules	Glycerophospholipids	Glycerophosphoethanolamines	Phosphatidylethanolamines
LC.03.0055	tricin 4'-O-(erythro-beta-guaiacylglyceryl) ether 9''-O-beta-D-glucopyranoside	2	Organic compounds	Lignans, neolignans and related compounds	Lignan glycosides	NA	Lignan glycosides
LC.03.0057	TG(16:0/18:2(9Z,12Z)/18:2(9Z,12Z))	2	Organic compounds	Lipids and lipid-like molecules	Glycerolipids	Triradylcglycerols	Triacylglycerols
LC.03.0058	TG(16:1(9Z)/18:1(9Z)/18:1(9Z))	2	Organic compounds	Lipids and lipid-like molecules	Glycerolipids	Triradylcglycerols	Triacylglycerols
LC.03.0060	3-(2-hydroxy-4-methoxyphenyl)-3,4-dihydro-2H-1-benzopyran-7-ol	2	Organic compounds	Phenylpropanoids and polyketides	Isoflavonoids	O-methylated isoflavonoids	4'-O-methylated isoflavonoids
LC.03.0061	Avenacoside B	2	Organic compounds	Lipids and lipid-like molecules	Steroids and steroid derivatives	Steroidal glycosides	Steroidal saponins
LC.03.0062	PIM1(16:0/16:2(9Z,12Z))	2	Organic compounds	Lipids and lipid-like molecules	Glycerophospholipids	Glycerophosphoinositols	Phosphatidylinositol monomannosides
LC.03.0063	Kadlongilactone C__1	2	Organic compounds	Organoheterocyclic compounds	Naphthopyrans	NA	Naphthopyrans
LC.03.0065	PC(36:3)	2	Organic compounds	Lipids and lipid-like molecules	Glycerophospholipids	Glycerophosphocholines	Phosphatidylcholines
LC.03.0066	Avenacin A-1__1	2	Organic compounds	Lipids and lipid-like molecules	Prenol lipids	Triterpenoids	Triterpenoids
LC.03.0067	UNPD185003	2	Organic compounds	Lipids and lipid-like molecules	Glycerolipids	Glycosylglycerols	Glycosylglycerols
LC.03.0068	Ectocarpene;(+)-(6S)-(1Z-Butenyl)-1,4-cycloheptadience__1	2	Organic compounds	Hydrocarbons	Unsaturated hydrocarbons	Olefins	Cycloalkenes
LC.03.0069	PA(20:3(8Z,11Z,14Z)/22:2(13Z,16Z))	2	Organic compounds	Lipids and lipid-like molecules	Glycerophospholipids	Glycerophosphates	1,2-diacylglycerol-3-phosphates
LC.03.0070	C56H74N10O23S	3	NA	NA	NA	NA	NA
LC.03.0071	Echinenone/ (Myxoxanthin)	2	Organic compounds	Lipids and lipid-like molecules	Prenol lipids	Tetraterpenoids	Xanthophylls
LC.03.0072	C48H94O14P2__1	3	NA	NA	NA	NA	NA
LC.03.0073	TG(18:1(9Z)/18:2(9Z,12Z)/18:2(9Z,12Z))	2	Organic compounds	Lipids and lipid-like molecules	Glycerolipids	Triradylcglycerols	Triacylglycerols
LC.03.0074	PC(18:1(9Z)/18:1(9Z))	2	Organic compounds	Lipids and lipid-like molecules	Glycerophospholipids	Glycerophosphocholines	Phosphatidylcholines
LC.03.0075	Dieporeticenin	2	Organic compounds	Lipids and lipid-like molecules	Fatty Acyls	Fatty alcohols	Annonaceous acetogenins
LC.03.0076	PE(34:2)	2	Organic compounds	Lipids and lipid-like molecules	Glycerophospholipids	Glycerophosphoethanolamines	Phosphatidylethanolamines
LC.03.0077	AC2SGL(18:0/28:0(2Me[S],4Me[S],6Me[S],8Me[R],10Me[R],12Me[R],13OH))	2	Organic compounds	Lipids and lipid-like molecules	Saccharolipids	Acyltrehaloses	Acyltrehaloses
LC.03.0078	LPC(18:2)	2	Organic compounds	Lipids and lipid-like molecules	Glycerophospholipids	Glycerophosphocholines	1-acyl-sn-glycero-3-phosphocholines
LC.03.0079	All-trans-heptaprenyl diphosphate	2	Organic compounds	Lipids and lipid-like molecules	Prenol lipids	Polyprenols	Bactoprenol diphosphates
LC.03.0080	PC(40:2)	2	Organic compounds	Lipids and lipid-like molecules	Glycerophospholipids	Glycerophosphocholines	Phosphatidylcholines
LC.03.0082	Gingerglycolipid B	2	Organic compounds	Lipids and lipid-like molecules	Glycerolipids	Glycosylglycerols	Glycosylmonoacylglycerols
LC.03.0083	Glycerophosphocholine	2	Organic compounds	Lipids and lipid-like molecules	Glycerophospholipids	Glycerophosphocholines	Glycerophosphocholines
LC.03.0084	Pescaprein XIV;(-)-Pescaprein XIV	2	Organic compounds	Organic oxygen compounds	Organooxygen compounds	Carbohydrates and carbohydrate conjugates	Oligosaccharides
LC.03.0085	1-18:3-2-18:2-digalactosyldiacylglycerol	2	Organic compounds	Lipids and lipid-like molecules	Glycerolipids	Glycosylglycerols	Glycosyldiacylglycerols
LC.03.0086	12-O-acetyl-16-O-methylhyrtiolide	2	Organic compounds	Lipids and lipid-like molecules	Prenol lipids	Sesterterpenoids	Scalarane sesterterpenoids
LC.03.0087	DG(34:3)	2	Organic compounds	Lipids and lipid-like molecules	Fatty Acyls	Lineolic acids and derivatives	Lineolic acids and derivatives
LC.03.0088	(2S,3S,4R,9E)-1,3,4-trihydroxyl-2-[(2'R)-2'-hydroxytetracosanoylamino]-9-octadecene	2	Organic compounds	Organic oxygen compounds	Organooxygen compounds	Alcohols and polyols	Secondary alcohols
LC.03.0089	UNPD64794	2	Organic compounds	Lipids and lipid-like molecules	Prenol lipids	Tetraterpenoids	Xanthophylls
LC.03.0090	PE(34:2)	2	Organic compounds	Lipids and lipid-like molecules	Glycerophospholipids	Glycerophosphoethanolamines	Phosphatidylethanolamines
LC.03.0092	C14H6O35P4S12	3	NA	NA	NA	NA	NA
LC.03.0093	C14H49N26O27P7S	3	NA	NA	NA	NA	NA
LC.03.0094	Maltopentaose	2	Organic compounds	Organic oxygen compounds	Organooxygen compounds	Carbohydrates and carbohydrate conjugates	Oligosaccharides
LC.03.0095	C20H77N37O35S	3	NA	NA	NA	NA	NA
LC.03.0096	Medicagol	2	Organic compounds	Phenylpropanoids and polyketides	Isoflavonoids	Coumestans	Coumestans
LC.03.0097	Rotundifolioside I;(-)-Rotundifolioside I	2	NA	NA	NA	NA	NA
LC.03.0099	C17H46N11O16P7S10	3	NA	NA	NA	NA	NA
LC.03.0100	PG(36:4)	2	Organic compounds	Lipids and lipid-like molecules	Glycerophospholipids	Glycerophosphoglycerols	Phosphatidylglycerols
LC.03.0101	DGDG(18:2(9Z,12Z)/18:2(9Z,12Z)[15(R)OH-18:2(9Z,12Z])	2	NA	NA	NA	NA	NA
LC.03.0102	C20H78N36O5P2S	3	NA	NA	NA	NA	NA
LC.03.0103	LPC(18:0)	2	Organic compounds	Lipids and lipid-like molecules	Glycerophospholipids	Glycerophosphocholines	1-acyl-sn-glycero-3-phosphocholines
LC.03.0104	Tuberoside A (Allium tuberosum)	2	Organic compounds	Lipids and lipid-like molecules	Steroids and steroid derivatives	Steroidal glycosides	Steroidal saponins
LC.03.0105	Penmacric acid	2	Organic compounds	Organic acids and derivatives	Carboxylic acids and derivatives	Amino acids, peptides, and analogues	Proline and derivatives
LC.03.0106	C18H36N2O7P2S14	3	NA	NA	NA	NA	NA
LC.03.0107	1-O-Hexadecyl-2-O-dihomogammalinolenoylglycero-3-phosphocholine	2	Organic compounds	Lipids and lipid-like molecules	Glycerophospholipids	Glycerophosphocholines	1-alkyl,2-acylglycero-3-phosphocholines
LC.03.0108	PC(34:1)	2	Organic compounds	Lipids and lipid-like molecules	Glycerophospholipids	Glycerophosphocholines	Phosphatidylcholines
LC.03.0109	UNPD33968	2	Organic compounds	Phenylpropanoids and polyketides	Macrolides and analogues	NA	Macrolides and analogues
LC.03.0110	DG(36:5)	2	Organic compounds	Lipids and lipid-like molecules	Fatty Acyls	Lineolic acids and derivatives	Lineolic acids and derivatives
LC.03.0111	Lactariamide A;(+)-Lactariamide A__1	2	Organic compounds	Lipids and lipid-like molecules	Fatty Acyls	Fatty amides	N-acyl amines
LC.03.0112	LysoPC(16:0)	2	Organic compounds	Lipids and lipid-like molecules	Glycerophospholipids	Glycerophosphocholines	1-acyl-sn-glycero-3-phosphocholines
LC.03.0113	Neocuscutoside C	2	Organic compounds	Lignans, neolignans and related compounds	Lignan glycosides	NA	Lignan glycosides
LC.03.0114	Herniarin	2	Organic compounds	Phenylpropanoids and polyketides	Coumarins and derivatives	NA	Coumarins and derivatives
LC.03.0115	Psoralen	2	Organic compounds	Phenylpropanoids and polyketides	Coumarins and derivatives	Furanocoumarins	Psoralens
LC.03.0116	N-[(1S,3R,4aS,9aR)-1-(hydroxymethyl)-3-[2-(2-methoxyethylamino)-2-oxoethyl]-3,4,4a,9a-tetrahydro-1H-pyrano[3,4-b]benzofuran-6-yl]-2-cyclopropylacetamide	2	NA	NA	NA	NA	NA
LC.03.0117	C21H79N42O6PS	3	NA	NA	NA	NA	NA
LC.03.0118	PI(40:4)	2	Organic compounds	Lipids and lipid-like molecules	Glycerophospholipids	Glycerophosphoinositols	Phosphatidylinositols
LC.03.0119	AC2SGL(18:0/30:0(2Me[S],4Me[S],6Me[S],8Me[R],10Me[R],12Me[R],13OH))	2	NA	NA	NA	NA	NA
LC.03.0120	PC(16:1(9Z)/2:0)	2	Organic compounds	Lipids and lipid-like molecules	Glycerophospholipids	Glycerophosphocholines	Phosphatidylcholines
LC.03.0121	LPC(18:2)	2	Organic compounds	Lipids and lipid-like molecules	Glycerophospholipids	Glycerophosphocholines	1-acyl-sn-glycero-3-phosphocholines
LC.03.0122	LPE(16:0)	2	Organic compounds	Lipids and lipid-like molecules	Glycerophospholipids	Glycerophosphoethanolamines	2-acyl-sn-glycero-3-phosphoethanolamines
LC.03.0123	C15H19N2O23P7S15	3	NA	NA	NA	NA	NA
LC.03.0124	C00051412	2	NA	NA	NA	NA	NA
LC.03.0125	avenanthramide B	2	Organic compounds	Phenylpropanoids and polyketides	Cinnamic acids and derivatives	Hydroxycinnamic acids and derivatives	Avenanthramides
LC.03.0126	10-formyltetrahydrofolate-4a-carbinolamine	2	Organic compounds	Organic acids and derivatives	Carboxylic acids and derivatives	Amino acids, peptides, and analogues	Glutamic acid and derivatives
LC.03.0127	UNPD127203	2	Organic compounds	Lipids and lipid-like molecules	Saccharolipids	NA	Saccharolipids
LC.03.0128	PG(18:1(9Z)/0:0)	2	Organic compounds	Lipids and lipid-like molecules	Glycerophospholipids	Glycerophosphoglycerols	Lysophosphatidylglycerols
LC.03.0129	C16H42N31O40P3S3	3	NA	NA	NA	NA	NA
LC.03.0132	PC(P-18:1(11Z)/22:2(13Z,16Z))	2	Organic compounds	Lipids and lipid-like molecules	Glycerophospholipids	Glycerophosphocholines	1-(1Z-alkenyl),2-acyl-glycerophosphocholines
LC.03.0133	TG(15:0/18:2(9Z,12Z)/18:4(6Z,9Z,12Z,15Z))	2	Organic compounds	Lipids and lipid-like molecules	Glycerolipids	Triradylcglycerols	Triacylglycerols
LC.03.0135	Ectocarpene;(+)-(6S)-(1Z-Butenyl)-1,4-cycloheptadience__2	2	Organic compounds	Hydrocarbons	Unsaturated hydrocarbons	Olefins	Cycloalkenes
LC.03.0136	DGDG(18:2(9Z,12Z)/18:2(9Z,12Z)[15(R)OH-18:2(9Z,12Z])	2	Organic compounds	Lipids and lipid-like molecules	Glycerolipids	Glycosylglycerols	Glycosyldiacylglycerols
LC.03.0138	C18H52N7O18P9S9	3	NA	NA	NA	NA	NA
LC.03.0139	LPE(18:2)	2	Organic compounds	Lipids and lipid-like molecules	Glycerophospholipids	Glycerophosphoethanolamines	2-acyl-sn-glycero-3-phosphoethanolamines
LC.03.0140	LPE(20:5)	2	Organic compounds	Lipids and lipid-like molecules	Glycerophospholipids	Glycerophosphoethanolamines	1-acyl-sn-glycero-3-phosphoethanolamines
LC.03.0141	Squarrosanin A	2	Organic compounds	Phenylpropanoids and polyketides	Tannins	Hydrolyzable tannins	Hydrolyzable tannins
LC.03.0142	UNPD216957	2	Organic compounds	Organic acids and derivatives	Peptidomimetics	Depsipeptides	Cyclic depsipeptides
LC.03.0143	TG(16:0/18:1(9Z)/20:1(11Z))	2	Organic compounds	Lipids and lipid-like molecules	Glycerolipids	Triradylcglycerols	Triacylglycerols
LC.03.0146	TG(18:1(9Z)/18:1(9Z)/18:1(9Z))	2	Organic compounds	Lipids and lipid-like molecules	Glycerolipids	Triradylcglycerols	Triacylglycerols
LC.03.0147	C47H102N5O5P	3	NA	NA	NA	NA	NA
LC.03.0148	PA(22:2(13Z,16Z)/20:2(11Z,14Z))	2	Organic compounds	Lipids and lipid-like molecules	Glycerophospholipids	Glycerophosphates	1,2-diacylglycerol-3-phosphates
LC.03.0149	PC(40:1)	2	Organic compounds	Lipids and lipid-like molecules	Glycerophospholipids	Glycerophosphocholines	Phosphatidylcholines
LC.03.0150	PE(36:4)	2	Organic compounds	Lipids and lipid-like molecules	Glycerophospholipids	Glycerophosphoethanolamines	Phosphatidylethanolamines
LC.03.0151	cis-Uvariamicin IV	2	Organic compounds	Lipids and lipid-like molecules	Fatty Acyls	Fatty alcohols	Annonaceous acetogenins
LC.03.0152	DG(34:1)	2	Organic compounds	Lipids and lipid-like molecules	Glycerolipids	Diradylglycerols	1,2-diacylglycerols
LC.03.0153	Ciwujianoside C1;Yemuoside YM14	2	Organic compounds	Lipids and lipid-like molecules	Prenol lipids	Terpene glycosides	Diterpene glycosides
LC.03.0154	Nuatigenin 3-[rhamnosyl-(1->2)-glucoside]	2	Organic compounds	Lipids and lipid-like molecules	Steroids and steroid derivatives	Steroidal glycosides	Steroidal saponins
LC.03.0155	Halishigamide B	2	Organic compounds	Lipids and lipid-like molecules	Prenol lipids	Terpene lactones	Diterpene lactones
LC.03.0156	UNPD100843	2	Organic compounds	Alkaloids and derivatives	Ibogan-type alkaloids	NA	Ibogan-type alkaloids
LC.03.0157	ent-7alpha-hydroxykaur-16-en-19-oic acid	2	Organic compounds	Lipids and lipid-like molecules	Prenol lipids	Diterpenoids	Kaurane diterpenoids
LC.03.0158	7',8'-Dihydro-8'-hydroxycitraniaxanthin	2	Organic compounds	Lipids and lipid-like molecules	Prenol lipids	Triterpenoids	Triterpenoids
LC.03.0159	C25H97N3O18P2S17	3	NA	NA	NA	NA	NA
LC.03.0160	C14H39N27O35P4	3	NA	NA	NA	NA	NA
LC.03.0161	Ancorinolate B	2	Organic compounds	Organic acids and derivatives	Organic sulfuric acids and derivatives	Arylsulfates	Arylsulfates
LC.03.0162	PG(18:3(6Z,9Z,12Z)/0:0)	2	Organic compounds	Lipids and lipid-like molecules	Glycerophospholipids	Glycerophosphoglycerols	Lysophosphatidylglycerols
LC.03.0163	Pregnanetriol	2	Organic compounds	Lipids and lipid-like molecules	Steroids and steroid derivatives	Pregnane steroids	Gluco/mineralocorticoids, progestogins and derivatives
LC.03.0164	Linoleic acid	2	Organic compounds	Lipids and lipid-like molecules	Fatty Acyls	Lineolic acids and derivatives	Lineolic acids and derivatives
LC.03.0165	Uric acid	2	Organic compounds	Organoheterocyclic compounds	Imidazopyrimidines	Purines and purine derivatives	Xanthines
LC.03.0168	UNPD101598__1	2	Organic compounds	Lipids and lipid-like molecules	Fatty Acyls	Eicosanoids	Other hydroxyeicosapolyenoic acids
LC.03.0169	TG(16:0/16:0/18:1(9Z))	2	Organic compounds	Lipids and lipid-like molecules	Glycerolipids	Triradylcglycerols	Triacylglycerols
LC.03.0170	TG(18:2(9Z,12Z)/18:2(9Z,12Z)/20:0)	2	Organic compounds	Lipids and lipid-like molecules	Glycerolipids	Triradylcglycerols	Triacylglycerols
LC.03.0171	UNPD72985__1	2	Organic compounds	Lipids and lipid-like molecules	Steroids and steroid derivatives	Ergostane steroids	Ergostane steroids
LC.03.0172	7-Ethyl-5,6-dihydro-1,4-dimethylazulene	2	NA	NA	NA	NA	NA
LC.03.0173	PA(22:2(13Z,16Z)/18:0)	2	Organic compounds	Lipids and lipid-like molecules	Glycerophospholipids	Glycerophosphates	1,2-diacylglycerol-3-phosphates
LC.03.0174	Gracilamide A;(+)-Gracilamide A	2	Organic compounds	Organic oxygen compounds	Organooxygen compounds	Alcohols and polyols	Secondary alcohols
LC.03.0175	C13H49N25O16P6S12	3	NA	NA	NA	NA	NA
LC.03.0176	UNPD12844	2	Organic compounds	Phenylpropanoids and polyketides	Macrolide lactams	NA	Macrolide lactams
LC.03.0177	(+)-Berbamunine;Berbamunine	2	Organic compounds	Organoheterocyclic compounds	Isoquinolines and derivatives	Benzylisoquinolines	Benzylisoquinolines
LC.03.0178	C47H80N12O29P2	3	NA	NA	NA	NA	NA
LC.03.0180	C18H72N35O28PS2	3	NA	NA	NA	NA	NA
LC.03.0181	6-Feruloylglucose 2,3,4-trihydroxy-3-methylbutylglycoside	2	Organic compounds	Lipids and lipid-like molecules	Fatty Acyls	Fatty acyl glycosides	Fatty acyl glycosides of mono- and disaccharides
LC.03.0182	1-Kestose	2	Organic compounds	Organic oxygen compounds	Organooxygen compounds	Carbohydrates and carbohydrate conjugates	Oligosaccharides
LC.03.0183	C7H4N8O4P2S6	3	NA	NA	NA	NA	NA
LC.03.0184	C10H8N6O21P4S9	3	NA	NA	NA	NA	NA
LC.03.0185	1,1',2,2',7,8'-Hexahydro-1'-hydroxy-1-methoxy-psi,psi-caroten-4-one	2	Organic compounds	Lipids and lipid-like molecules	Prenol lipids	Tetraterpenoids	Xanthophylls
LC.03.0186	Neoxanthin	2	Organic compounds	Lipids and lipid-like molecules	Prenol lipids	Tetraterpenoids	Xanthophylls
LC.03.0187	Eicosapentaenoic acid	2	Organic compounds	Lipids and lipid-like molecules	Fatty Acyls	Fatty acids and conjugates	Long-chain fatty acids
LC.03.0189	Trandolapril	2	Organic compounds	Organic acids and derivatives	Carboxylic acids and derivatives	Amino acids, peptides, and analogues	Dipeptides
LC.03.0190	C48H94O14P2__2	3	NA	NA	NA	NA	NA
LC.03.0192	(9S)-erythromycyclamine__1	2	Organic compounds	Organic oxygen compounds	Organooxygen compounds	Carbohydrates and carbohydrate conjugates	Aminoglycosides
LC.03.0194	Pescaprein VI;(-)-Pescaprein VI	2	Organic compounds	Organic oxygen compounds	Organooxygen compounds	Carbohydrates and carbohydrate conjugates	Oligosaccharides
LC.03.0196	C13H35N23O31P4S7	3	NA	NA	NA	NA	NA
LC.03.0197	C11H31N19O20P4S10	3	NA	NA	NA	NA	NA
LC.03.0199	C13H29N17O30P2S8	3	NA	NA	NA	NA	NA
LC.03.0200	PC(16:1(9Z)/2:0)	2	Organic compounds	Lipids and lipid-like molecules	Glycerophospholipids	Glycerophosphocholines	Phosphatidylcholines
LC.03.0201	1-Epidactimicin	2	NA	NA	NA	NA	NA
LC.03.0202	N-[(3S,9R,10R)-9-[[cyclopropylmethyl(methyl)amino]methyl]-12-[(2S)-1-hydroxypropan-2-yl]-3,10-dimethyl-13-oxo-2,8-dioxa-12-azabicyclo[12.4.0]octadeca-1(14),15,17-trien-16-yl]methanesulfonamide	2	Organic compounds	Phenylpropanoids and polyketides	Macrolactams	NA	Macrolactams
LC.03.0203	Linoleoyl ethanolamide	2	Organic compounds	Organic nitrogen compounds	Organonitrogen compounds	Amines	N-acylethanolamines
LC.03.0204	UNPD223506	2	Organic compounds	Organic acids and derivatives	Carboxylic acids and derivatives	Amino acids, peptides, and analogues	Peptides
LC.03.0205	UNPD81690	2	Organic compounds	Lipids and lipid-like molecules	Sphingolipids	Glycosphingolipids	Glycosyl-N-acylsphingosines
LC.03.0206	UNPD182178	2	Organic compounds	Organic Polymers	Polypeptides	NA	Polypeptides
LC.03.0207	C20H73N39S4	3	NA	NA	NA	NA	NA
LC.03.0208	UNPD152389	2	Organic compounds	Lipids and lipid-like molecules	Prenol lipids	Sesterterpenoids	Sesterterpenoids
LC.03.0209	Mangostenone B	2	Organic compounds	Organoheterocyclic compounds	Benzopyrans	1-benzopyrans	4-prenylated xanthones
LC.03.0210	(R)-1-O-[b-D-Glucopyranosyl-(1->6)-b-D-glucopyranoside]-1,3-octanediol	2	Organic compounds	Lipids and lipid-like molecules	Fatty Acyls	Fatty acyl glycosides	Fatty acyl glycosides of mono- and disaccharides
LC.03.0211	Chenodeoxycholic acid 3-sulfate	2	Organic compounds	Lipids and lipid-like molecules	Steroids and steroid derivatives	Bile acids, alcohols and derivatives	Monohydroxy bile acids, alcohols and derivatives
LC.03.0212	Chenodeoxycholic acid 3-sulfate	2	Organic compounds	Lipids and lipid-like molecules	Steroids and steroid derivatives	Bile acids, alcohols and derivatives	Monohydroxy bile acids, alcohols and derivatives
LC.03.0213	C48H94O14P2__3	3	NA	NA	NA	NA	NA
LC.03.0216	(S)-3-Hydroxytetradecanoyl-CoA	2	Organic compounds	Lipids and lipid-like molecules	Fatty Acyls	Fatty acyl thioesters	Long-chain fatty acyl CoAs
LC.03.0217	PC(38:1)	2	Organic compounds	Lipids and lipid-like molecules	Glycerophospholipids	Glycerophosphocholines	Phosphatidylcholines
LC.03.0218	PC(34:2)	2	Organic compounds	Lipids and lipid-like molecules	Glycerophospholipids	Glycerophosphocholines	1-(1Z-alkenyl),2-acyl-glycerophosphocholines
LC.03.0219	C13H27N7O20P6S10	3	NA	NA	NA	NA	NA
LC.03.0220	Muricatenol	2	Organic compounds	Lipids and lipid-like molecules	Fatty Acyls	Fatty alcohols	Annonaceous acetogenins
LC.03.0221	UNPD104429	2	Organic compounds	Lipids and lipid-like molecules	Glycerolipids	Triradylcglycerols	Triacylglycerols
LC.03.0222	UNPD218450__1	2	Organic compounds	Organic oxygen compounds	Organooxygen compounds	Alcohols and polyols	Secondary alcohols
LC.03.0225	C19H59N19O4	3	NA	NA	NA	NA	NA
LC.03.0226	PG(34:2)	2	Organic compounds	Lipids and lipid-like molecules	Glycerophospholipids	Glycerophosphoglycerols	Phosphatidylglycerols
LC.03.0227	MG(18:2)	2	Organic compounds	Lipids and lipid-like molecules	Fatty Acyls	Lineolic acids and derivatives	Lineolic acids and derivatives
LC.03.0228	XLXG xyloglucan oligosaccharide	2	Organic compounds	Organic oxygen compounds	Organooxygen compounds	Carbohydrates and carbohydrate conjugates	Oligosaccharides
LC.03.0229	C4H8NO9PS	3	NA	NA	NA	NA	NA
LC.03.0230	Methyl 3beta-acetoxy-6-hydroxy-1-oxomeliac-14-enoate;(-)-Methyl 3beta-acetoxy-6-hydroxy-1-oxomeliac-14-enoate	2	NA	NA	NA	NA	NA
LC.03.0231	Halitulin	2	NA	NA	NA	NA	NA
LC.03.0232	Dehydrocarpaine I	2	Organic compounds	Phenylpropanoids and polyketides	Macrolides and analogues	NA	Macrolides and analogues
LC.03.0233	C00050791	2	Organic compounds	Lipids and lipid-like molecules	Fatty Acyls	Fatty alcohols	Long-chain fatty alcohols
LC.03.0234	PC(36:5)	2	Organic compounds	Lipids and lipid-like molecules	Glycerophospholipids	Glycerophosphocholines	Phosphatidylcholines
LC.03.0235	UNPD219095	2	Organic compounds	Organic acids and derivatives	Peptidomimetics	Depsipeptides	Cyclic depsipeptides
LC.03.0236	C15H55N25O37P2S8	3	NA	NA	NA	NA	NA
LC.03.0237	5-methyltetrahydrosarcinapterin(4-)	2	Organic compounds	Organic oxygen compounds	Organooxygen compounds	Carbohydrates and carbohydrate conjugates	Pentose phosphates
LC.03.0238	Argentinic acid G__1	2	Organic compounds	Lipids and lipid-like molecules	Prenol lipids	Sesquiterpenoids	Sesquiterpenoids
LC.03.0239	1-18:2-2-18:3-monogalactosyldiacylglycerol__1	2	Organic compounds	Lipids and lipid-like molecules	Glycerolipids	Glycosylglycerols	Glycosyldiacylglycerols
LC.03.0240	PA(22:2(13Z,16Z)/18:1(9Z))	2	Organic compounds	Lipids and lipid-like molecules	Glycerophospholipids	Glycerophosphates	1,2-diacylglycerol-3-phosphates
LC.03.0241	Cer(d16:2(4E,6E)/20:0(2OH))	2	Organic compounds	Lipids and lipid-like molecules	Sphingolipids	Ceramides	Ceramides
LC.03.0242	PE(34:2)	2	Organic compounds	Lipids and lipid-like molecules	Glycerophospholipids	Glycerophosphoethanolamines	Phosphatidylethanolamines
LC.03.0243	DG(36:6)	2	Organic compounds	Lipids and lipid-like molecules	Fatty Acyls	Lineolic acids and derivatives	Lineolic acids and derivatives
LC.03.0244	C13H49N25O17P6S12	3	NA	NA	NA	NA	NA
LC.03.0245	22:2-Glc-Stigmasterol	2	Organic compounds	Lipids and lipid-like molecules	Steroids and steroid derivatives	Stigmastanes and derivatives	Stigmastanes and derivatives
LC.03.0246	C11H21N17O18P4S8	3	NA	NA	NA	NA	NA
LC.03.0247	UNPD17766	2	Organic compounds	Organic oxygen compounds	Organooxygen compounds	Ethers	Ketals
LC.03.0249	C15H57N15O27P6S10	3	NA	NA	NA	NA	NA
LC.03.0250	11,12-DiHETrE	2	Organic compounds	Lipids and lipid-like molecules	Fatty Acyls	Eicosanoids	Hydroxyeicosatrienoic acids
LC.03.0251	Gingerglycolipid C	2	Organic compounds	Lipids and lipid-like molecules	Glycerolipids	Glycosylglycerols	Glycosylmonoacylglycerols
LC.03.0252	C14H50N25O23P7S3	3	NA	NA	NA	NA	NA
LC.03.0253	C43H77N7O21P4S	3	NA	NA	NA	NA	NA
LC.03.0254	Leu-Asp-Ser	2	Organic compounds	Organic acids and derivatives	Carboxylic acids and derivatives	Amino acids, peptides, and analogues	Oligopeptides
LC.03.0255	Coumarin	2	Organic compounds	Phenylpropanoids and polyketides	Coumarins and derivatives	NA	Coumarins and derivatives
LC.03.0256	Andrachcinidine;(-)-Andrachcinidine	2	Organic compounds	Organoheterocyclic compounds	Piperidines	NA	Piperidines
LC.03.0257	UNPD10811	2	Organic compounds	Benzenoids	Benzene and substituted derivatives	Nitrobenzenes	Nitrobenzenes
LC.03.0258	SW-163E	2	Organic compounds	Organic acids and derivatives	Peptidomimetics	Depsipeptides	Cyclic depsipeptides
LC.03.0259	Isopimpinellin	2	Organic compounds	Phenylpropanoids and polyketides	Coumarins and derivatives	Furanocoumarins	8-methoxypsoralens
LC.03.0260	PG(16:0/0:0)	2	Organic compounds	Lipids and lipid-like molecules	Glycerophospholipids	Glycerophosphoglycerols	Lysophosphatidylglycerols
LC.03.0261	3-[(4R,5R)-4-carbamoyl-2-[4-(3-hydroxypropoxy)phenyl]-5-phenyl-5H-oxazol-4-yl]propanoic acid tert-butyl ester__1	2	Organic compounds	Organic acids and derivatives	Carboxylic acids and derivatives	Amino acids, peptides, and analogues	Alpha amino acids and derivatives
LC.03.0262	Chenodeoxycholic acid 3-sulfate	2	Organic compounds	Lipids and lipid-like molecules	Steroids and steroid derivatives	Bile acids, alcohols and derivatives	Monohydroxy bile acids, alcohols and derivatives
LC.03.0263	SR 49498	2	Organic compounds	Benzenoids	Benzene and substituted derivatives	Biphenyls and derivatives	Biphenyls and derivatives
LC.03.0264	beta-Sitosterol 3-O-beta-D-galactopyranoside	2	Organic compounds	Lipids and lipid-like molecules	Steroids and steroid derivatives	Stigmastanes and derivatives	Stigmastanes and derivatives
LC.03.0265	emodepside__1	2	NA	NA	NA	NA	NA
LC.03.0266	Pravastatin	2	Organic compounds	Organic acids and derivatives	Hydroxy acids and derivatives	Medium-chain hydroxy acids and derivatives	Medium-chain hydroxy acids and derivatives
LC.03.0267	PS(44:12)	2	Organic compounds	Lipids and lipid-like molecules	Glycerophospholipids	Glycerophosphoserines	Phosphatidylserines
LC.03.0268	C45H81O9P	3	NA	NA	NA	NA	NA
LC.03.0269	Pregnanetriol	2	Organic compounds	Lipids and lipid-like molecules	Steroids and steroid derivatives	Pregnane steroids	Gluco/mineralocorticoids, progestogins and derivatives
LC.03.0270	TG(16:1(9Z)/18:0/18:0)	2	Organic compounds	Lipids and lipid-like molecules	Glycerolipids	Triradylcglycerols	Triacylglycerols
LC.03.0271	TG(18:1(9Z)/18:1(9Z)/20:1(11Z))	2	Organic compounds	Lipids and lipid-like molecules	Glycerolipids	Triradylcglycerols	Triacylglycerols
LC.03.0272	C19H43N3O39P4S3	3	NA	NA	NA	NA	NA
LC.03.0275	vandateroside III, (-)-	2	NA	NA	NA	NA	NA
LC.03.0276	C17H62N31O18P5	3	NA	NA	NA	NA	NA
LC.03.0277	Montecristin	2	NA	NA	NA	NA	NA
LC.03.0278	C19H73N27O47P8	3	NA	NA	NA	NA	NA
LC.03.0279	PC(32:0)	2	Organic compounds	Lipids and lipid-like molecules	Glycerophospholipids	Glycerophosphocholines	Phosphatidylcholines
LC.03.0280	PC(36:1)	2	Organic compounds	Lipids and lipid-like molecules	Glycerophospholipids	Glycerophosphocholines	Phosphatidylcholines
LC.03.0281	UNPD3509	2	NA	NA	NA	NA	NA
LC.03.0282	Hydroxyspirilloxanthin/ OH-Spirilloxanthin/ (Monometylated spirilloxanthin)	2	Organic compounds	Lipids and lipid-like molecules	Prenol lipids	Tetraterpenoids	Xanthophylls
LC.03.0283	UNPD132651	2	NA	NA	NA	NA	NA
LC.03.0284	C36H72N2O2	3	NA	NA	NA	NA	NA
LC.03.0285	DG(32:2)	2	Organic compounds	Lipids and lipid-like molecules	Fatty Acyls	Lineolic acids and derivatives	Lineolic acids and derivatives
LC.03.0286	PE(34:1)	2	Organic compounds	Lipids and lipid-like molecules	Glycerophospholipids	Glycerophosphoethanolamines	Phosphatidylethanolamines
LC.03.0287	C33H81N13OS	3	NA	NA	NA	NA	NA
LC.03.0288	Goyaglycoside c	2	NA	NA	NA	NA	NA
LC.03.0289	PE(36:3)	2	Organic compounds	Lipids and lipid-like molecules	Glycerophospholipids	Glycerophosphoethanolamines	Phosphatidylethanolamines
LC.03.0290	DG(38:2)	2	Organic compounds	Lipids and lipid-like molecules	Glycerolipids	Diradylglycerols	1,2-diacylglycerols
LC.03.0291	C9H22N15O21P3S9	3	NA	NA	NA	NA	NA
LC.03.0292	C11H22N17O11P5S10	3	NA	NA	NA	NA	NA
LC.03.0293	DG(34:1)	2	Organic compounds	Lipids and lipid-like molecules	Glycerolipids	Diradylglycerols	1,2-diacylglycerols
LC.03.0294	7alpha-Methoxy-8-labdene-3beta,15-diol__1	2	NA	NA	NA	NA	NA
LC.03.0295	Isofucosterol 3-O-[6-O-Hexadecanoyl-b-D-glucopyranoside]	2	NA	NA	NA	NA	NA
LC.03.0297	TG(18:1(9Z)/18:1(9Z)/20:5(5Z,8Z,11Z,14Z,17Z))	2	Organic compounds	Lipids and lipid-like molecules	Glycerolipids	Triradylcglycerols	Triacylglycerols
LC.03.0298	UNPD190178	2	NA	NA	NA	NA	NA
LC.03.0299	Aglasilvinic acid;(+)-Aglasilvinic acid	2	NA	NA	NA	NA	NA
LC.03.0300	PC(16:0/2:0)	2	Organic compounds	Lipids and lipid-like molecules	Glycerophospholipids	Glycerophosphocholines	Phosphatidylcholines
LC.03.0301	1-[(4S,7R,8S)-5-[cyclohexyl(oxo)methyl]-8-methoxy-4,7,10-trimethyl-11-oxo-2-oxa-5,10-diazabicyclo[10.4.0]hexadeca-1(12),13,15-trien-14-yl]-3-propylurea	2	NA	NA	NA	NA	NA
LC.03.0302	C23H91N45O4P2S3	3	NA	NA	NA	NA	NA
LC.03.0303	(2E,18R)-18-hydroxynonadec-2-enoic acid	2	Organic compounds	Lipids and lipid-like molecules	Fatty Acyls	Fatty acids and conjugates	Long-chain fatty acids
LC.03.0304	C14H2N9O31P3S13	3	NA	NA	NA	NA	NA
LC.03.0305	C14H7O33P7S11	3	NA	NA	NA	NA	NA
LC.03.0306	UNPD29522	2	NA	NA	NA	NA	NA
LC.03.0307	C25H89NO11P4S17	3	NA	NA	NA	NA	NA
LC.03.0308	C23H91N5O14P4S16	3	NA	NA	NA	NA	NA
LC.03.0309	3-[3-Carboxy-2,3-dihydro-2-(4-hydroxy-3-methoxyphenyl)-7-methoxy-5-benzofuranyl]-2-propenoic acid	2	NA	NA	NA	NA	NA
LC.03.0310	Prostaglandin E1	2	Organic compounds	Lipids and lipid-like molecules	Fatty Acyls	Eicosanoids	Prostaglandins and related compounds
LC.03.0311	C4H6O3S3	3	NA	NA	NA	NA	NA
LC.03.0312	2'-Deoxymugineic acid	2	NA	NA	NA	NA	NA
LC.03.0313	(+)-Hydroxypinoresinol 4,4'-di-O-beta-D-glucopyranoside	2	NA	NA	NA	NA	NA
LC.03.0314	Tetrahexosylceramide (d18:1/16:0)	2	Organic compounds	Lipids and lipid-like molecules	Sphingolipids	Glycosphingolipids	Glycosyl-N-acylsphingosines
LC.03.0315	Trigonelline	2	Organic compounds	Alkaloids and derivatives	NA	NA	Alkaloids and derivatives
LC.03.0316	C7HN2O3PS4	3	NA	NA	NA	NA	NA
LC.03.0317	M = 121.9182	NA	NA	NA	NA	NA	NA
LC.03.0318	C4H2OS	3	NA	NA	NA	NA	NA
LC.03.0319	Pregnanetriol	2	Organic compounds	Lipids and lipid-like molecules	Steroids and steroid derivatives	Pregnane steroids	Gluco/mineralocorticoids, progestogins and derivatives
LC.03.0320	Soyasaponin beta-A	2	NA	NA	NA	NA	NA
LC.03.0321	emodepside__2	2	NA	NA	NA	NA	NA
LC.03.0322	Lucidenic acid C	2	NA	NA	NA	NA	NA
LC.03.0323	Dihydroisocangorosin A__1	2	NA	NA	NA	NA	NA
LC.03.0324	Shizukaol J;(+)-Shizukaol J	2	NA	NA	NA	NA	NA
LC.03.0325	5-(1-hydroxypropan-2-yl)isolongifol-4-ene	2	NA	NA	NA	NA	NA
LC.03.0326	C10H13NO25P4S9	3	NA	NA	NA	NA	NA
LC.03.0327	UNPD142546	2	NA	NA	NA	NA	NA
LC.03.0328	C48H94O14P2__4	3	NA	NA	NA	NA	NA
LC.03.0329	Chenodeoxycholic acid 3-sulfate	2	NA	NA	NA	NA	NA
LC.03.0333	C20H37N7O3S19	3	NA	NA	NA	NA	NA
LC.03.0337	PS(O-20:0/18:2(9Z,12Z))	2	NA	NA	NA	NA	NA
LC.03.0339	UNPD72985__2	2	NA	NA	NA	NA	NA
LC.03.0340	PI(22:2(13Z,16Z)/22:1(11Z))	2	NA	NA	NA	NA	NA
LC.03.0341	C13H46N17O31P5S9	3	NA	NA	NA	NA	NA
LC.03.0342	PA(20:2(11Z,14Z)/22:0)	2	Organic compounds	Lipids and lipid-like molecules	Glycerophospholipids	Glycerophosphates	1,2-diacylglycerol-3-phosphates
LC.03.0343	C22H50N21O43P7	3	NA	NA	NA	NA	NA
LC.03.0344	DG(32:0)	2	Organic compounds	Lipids and lipid-like molecules	Glycerolipids	Diradylglycerols	1,2-diacylglycerols
LC.03.0345	C17H39N3O40P8S2	3	NA	NA	NA	NA	NA
LC.03.0346	DG(34:2)	2	Organic compounds	Lipids and lipid-like molecules	Fatty Acyls	Lineolic acids and derivatives	Lineolic acids and derivatives
LC.03.0347	UNPD189823	2	NA	NA	NA	NA	NA
LC.03.0348	Clavepictine B	2	NA	NA	NA	NA	NA
LC.03.0349	C12H6O8P2S11	3	NA	NA	NA	NA	NA
LC.03.0351	PE(36:5)	2	Organic compounds	Lipids and lipid-like molecules	Glycerophospholipids	Glycerophosphoethanolamines	Phosphatidylethanolamines
LC.03.0352	C13H37N6O20P5S10	3	NA	NA	NA	NA	NA
LC.03.0354	Pregnanetriol	2	Organic compounds	Lipids and lipid-like molecules	Steroids and steroid derivatives	Pregnane steroids	Gluco/mineralocorticoids, progestogins and derivatives
LC.03.0355	AC2SGL(16:0/30:0(2Me[S],4Me[S],6Me[S],8Me[R],10Me[R],12Me[R],13OH))	2	NA	NA	NA	NA	NA
LC.03.0356	UNPD36405	2	NA	NA	NA	NA	NA
LC.03.0357	LPE(15:0)	2	Organic compounds	Lipids and lipid-like molecules	Glycerophospholipids	Glycerophosphoethanolamines	2-acyl-sn-glycero-3-phosphoethanolamines
LC.03.0358	LPC(18:3)	2	Organic compounds	Lipids and lipid-like molecules	Glycerophospholipids	Glycerophosphocholines	1-acyl-sn-glycero-3-phosphocholines
LC.03.0359	Testosterone glucuronide	2	Organic compounds	Lipids and lipid-like molecules	Steroids and steroid derivatives	Steroidal glycosides	Steroid glucuronide conjugates
LC.03.0360	Melongoside F	2	NA	NA	NA	NA	NA
LC.03.0361	N-[(Z)-dodec-2-enoyl]morpholine	2	Organic compounds	Organoheterocyclic compounds	Oxazinanes	Morpholines	Morpholines
LC.03.0362	C13H45N18O32P5S2	3	NA	NA	NA	NA	NA
LC.03.0363	C67H113NO16P2	3	NA	NA	NA	NA	NA
LC.03.0364	UNPD197308	2	NA	NA	NA	NA	NA
LC.03.0365	Calcigeroside D1	2	NA	NA	NA	NA	NA
LC.03.0368	Geranylfarnesyl diphosphate	2	NA	NA	NA	NA	NA
LC.03.0369	tricin 4'-O-(threo-beta-guaiacylglyceryl) ether 7-O-beta-D-glucopyranoside__1	2	NA	NA	NA	NA	NA
LC.03.0370	Sophoracoumestan A	2	Organic compounds	Phenylpropanoids and polyketides	Isoflavonoids	Coumestans	Coumestans
LC.03.0372	PS(20:0/0:0)	2	NA	NA	NA	NA	NA
LC.03.0373	3-oxo-cholyl-CoA	2	NA	NA	NA	NA	NA
LC.03.0374	Barbaline	2	NA	NA	NA	NA	NA
LC.03.0375	deacetylisoipecoside	2	Organic compounds	Lipids and lipid-like molecules	Prenol lipids	Terpene glycosides	Terpene glycosides
LC.03.0376	Senampeline A	2	NA	NA	NA	NA	NA
LC.03.0377	5,10-Methylene-THF	2	Organic compounds	Organoheterocyclic compounds	Pteridines and derivatives	Pterins and derivatives	Tetrahydrofolic acids
LC.03.0378	Inositol 1,3,4-trisphosphate	2	Organic compounds	Organic oxygen compounds	Organooxygen compounds	Alcohols and polyols	Inositol phosphates
LC.03.0379	Nicotinamide ribotide	2	NA	NA	NA	NA	NA
LC.03.0380	Testosterone glucuronide	2	Organic compounds	Lipids and lipid-like molecules	Steroids and steroid derivatives	Steroidal glycosides	Steroid glucuronide conjugates
LC.03.0381	(R)-2,3-Dihydroxy-isovalerate	2	Organic compounds	Lipids and lipid-like molecules	Fatty Acyls	Fatty acids and conjugates	Hydroxy fatty acids
LC.03.0382	C10H4N9O20P5S8	3	NA	NA	NA	NA	NA
LC.03.0383	Psoralen	2	Organic compounds	Phenylpropanoids and polyketides	Coumarins and derivatives	Furanocoumarins	Psoralens
LC.03.0384	C35H86N14O14S	3	NA	NA	NA	NA	NA
LC.03.0385	docos-13-enamide, Amides, C22 (unsaturated)	2	Organic compounds	Lipids and lipid-like molecules	Fatty Acyls	Fatty amides	Fatty amides
LC.03.0386	C13H37N11O29P6S10	3	NA	NA	NA	NA	NA
LC.03.0387	Stigmasteryl glucoside	2	NA	NA	NA	NA	NA
LC.03.0388	Isohyodeoxycholic acid	2	NA	NA	NA	NA	NA
LC.03.0389	PC(32:2)	2	Organic compounds	Lipids and lipid-like molecules	Glycerophospholipids	Glycerophosphocholines	Phosphatidylcholines
LC.03.0390	C9H11N16O15P3S7	3	NA	NA	NA	NA	NA
LC.03.0392	C57H106O7	3	NA	NA	NA	NA	NA
LC.03.0393	TG(18:0/18:1(9Z)/20:4(5Z,8Z,11Z,14Z))	2	Organic compounds	Lipids and lipid-like molecules	Glycerolipids	Triradylcglycerols	Triacylglycerols
LC.03.0394	GlcCer(d18:2/20:0)	2	NA	NA	NA	NA	NA
LC.03.0395	Squamocin L	2	NA	NA	NA	NA	NA
LC.03.0396	DG(34:4)	2	Organic compounds	Lipids and lipid-like molecules	Fatty Acyls	Lineolic acids and derivatives	Lineolic acids and derivatives
LC.03.0397	N-(2-phenoxy-ethyl) arachidonoyl amine	2	Organic compounds	Benzenoids	Phenol ethers	NA	Phenol ethers
LC.03.0398	PI(38:2)	2	Organic compounds	Lipids and lipid-like molecules	Glycerophospholipids	Glycerophosphoinositols	Phosphatidylinositols
LC.03.0400	Ocimumoside B;(+)-Ocimumoside B	2	NA	NA	NA	NA	NA
LC.03.0402	PG(38:6)	2	Organic compounds	Lipids and lipid-like molecules	Glycerophospholipids	Glycerophosphoglycerols	Phosphatidylglycerols
LC.03.0403	TG(10:0/10:0/8:0)	2	Organic compounds	Lipids and lipid-like molecules	Glycerolipids	Triradylcglycerols	Triacylglycerols
LC.03.0404	PC(40:3)	2	Organic compounds	Lipids and lipid-like molecules	Glycerophospholipids	Glycerophosphocholines	1-alkyl,2-acylglycero-3-phosphocholines
LC.03.0405	GPL C-II	2	Organic compounds	Organic acids and derivatives	Carboxylic acids and derivatives	Amino acids, peptides, and analogues	Oligopeptides
LC.03.0406	N-arachidonoylsphingosine	2	Organic compounds	Lipids and lipid-like molecules	Sphingolipids	Ceramides	Long-chain ceramides
LC.03.0408	C13H21N11O22P2S9	3	NA	NA	NA	NA	NA
LC.03.0409	Sitoindoside I	2	NA	NA	NA	NA	NA
LC.03.0410	Hexacosyl trans-ferulate;n-Hexacosyl trans-ferulate__2	2	Organic compounds	Phenylpropanoids and polyketides	Cinnamic acids and derivatives	Hydroxycinnamic acids and derivatives	Coumaric acids and derivatives
LC.03.0411	tanacetolide A	2	Organic compounds	Lipids and lipid-like molecules	Sphingolipids	Ceramides	Long-chain ceramides
LC.03.0412	CL(18:1(9Z)/18:1(9Z)/20:4(5Z,8Z,11Z,14Z)/18:1(9Z))	2	Organic compounds	Lipids and lipid-like molecules	Glycerophospholipids	Glycerophosphoglycerophosphoglycerols	Cardiolipins
LC.03.0413	UNPD54416	2	NA	NA	NA	NA	NA
LC.03.0414	DG(36:1)	2	Organic compounds	Lipids and lipid-like molecules	Glycerolipids	Diradylglycerols	1,2-diacylglycerols
LC.03.0415	PE(34:2)	2	Organic compounds	Lipids and lipid-like molecules	Glycerophospholipids	Glycerophosphoethanolamines	Phosphatidylethanolamines
LC.03.0416	UNPD22549__1	2	Organic compounds	Organoheterocyclic compounds	Pyrrolines	NA	Pyrrolines
LC.03.0417	UNPD230090	2	Organic compounds	Organoheterocyclic compounds	Pyrans	Pyranones and derivatives	Pyranones and derivatives
LC.03.0418	Methylsyringin	2	NA	NA	NA	NA	NA
LC.03.0419	UNPD91858	2	NA	NA	NA	NA	NA
LC.03.0420	Agavoside A	2	NA	NA	NA	NA	NA
LC.03.0421	8-iso-PGA1	2	Organic compounds	Lipids and lipid-like molecules	Fatty Acyls	Eicosanoids	Prostaglandins and related compounds
LC.03.0422	LPE(18:1)	2	Organic compounds	Lipids and lipid-like molecules	Glycerophospholipids	Glycerophosphoethanolamines	1-acyl-sn-glycero-3-phosphoethanolamines
LC.03.0423	MG(18:2)	2	Organic compounds	Lipids and lipid-like molecules	Fatty Acyls	Lineolic acids and derivatives	Lineolic acids and derivatives
LC.03.0424	2-Methoxy-estradiol-17b 3-glucuronide	2	Organic compounds	Lipids and lipid-like molecules	Steroids and steroid derivatives	Steroidal glycosides	Steroid glucuronide conjugates
LC.03.0426	Arborcandin F	2	NA	NA	NA	NA	NA
LC.03.0427	C14H7N5O22P6S14	3	NA	NA	NA	NA	NA
LC.03.0428	C11H25N18O27P3S10	3	NA	NA	NA	NA	NA
LC.03.0429	C15H7N5O22P6S14	3	NA	NA	NA	NA	NA
LC.03.0430	C14H52N18O35P4S3	3	NA	NA	NA	NA	NA
LC.03.0431	C20H80N12O13P4S15	3	NA	NA	NA	NA	NA
LC.03.0432	C12H48N24O29P4S4	3	NA	NA	NA	NA	NA
LC.03.0434	UNPD96450	2	NA	NA	NA	NA	NA
LC.03.0435	1-O-Sinapoylglucose	2	NA	NA	NA	NA	NA
LC.03.0436	Dihydroferulic acid 4-O-glucuronide	2	NA	NA	NA	NA	NA
LC.03.0437	Herniarin	2	Organic compounds	Phenylpropanoids and polyketides	Coumarins and derivatives	NA	Coumarins and derivatives
LC.03.0438	LPC(22:5)	2	Organic compounds	Lipids and lipid-like molecules	Glycerophospholipids	Glycerophosphocholines	1-acyl-sn-glycero-3-phosphocholines
LC.03.0439	platycodin D2	2	NA	NA	NA	NA	NA
LC.03.0440	Alpha-dimorphecolic acid	2	Organic compounds	Lipids and lipid-like molecules	Fatty Acyls	Lineolic acids and derivatives	Lineolic acids and derivatives
LC.03.0441	3-[(2-oxo-1-benzopyran-4-yl)thio]-2-butenoic acid ethyl ester	2	Organic compounds	Phenylpropanoids and polyketides	Coumarins and derivatives	NA	Coumarins and derivatives
LC.03.0442	C4HNO2S2	3	NA	NA	NA	NA	NA
LC.03.0443	2-Hydroxycinnamic acid	2	Organic compounds	Phenylpropanoids and polyketides	Cinnamic acids and derivatives	Hydroxycinnamic acids and derivatives	Hydroxycinnamic acids
LC.03.0444	Petasinoside	2	NA	NA	NA	NA	NA
LC.03.0445	C15H57N29O12P2S3	3	NA	NA	NA	NA	NA
LC.03.0446	C5H6O5P2S3	3	NA	NA	NA	NA	NA
LC.03.0447	metisazone	2	Organic compounds	Organoheterocyclic compounds	Indoles and derivatives	NA	Indoles and derivatives
LC.03.0448	C6H12N5O11PS2	3	NA	NA	NA	NA	NA
LC.03.0449	C4H5O5PS	3	NA	NA	NA	NA	NA
LC.03.0450	3-[(4R,5R)-4-carbamoyl-2-[4-(3-hydroxypropoxy)phenyl]-5-phenyl-5H-oxazol-4-yl]propanoic acid tert-butyl ester__2	2	NA	NA	NA	NA	NA
LC.03.0451	beta-Bixin	2	Organic compounds	Lipids and lipid-like molecules	Prenol lipids	Diterpenoids	Acyclic diterpenoids
LC.03.0452	UNPD22549__2	2	Organic compounds	Organoheterocyclic compounds	Pyrrolines	NA	Pyrrolines
LC.03.0453	8beta,13R-Epoxy-14R,15,18-eperuanetriol	2	NA	NA	NA	NA	NA
LC.03.0454	1-Stearoylglycerophosphoglycerol	2	NA	NA	NA	NA	NA
LC.03.0455	Pravastatin	2	Organic compounds	Organic acids and derivatives	Hydroxy acids and derivatives	Medium-chain hydroxy acids and derivatives	Medium-chain hydroxy acids and derivatives
LC.03.0456	Tonkinin C;(+)-Tonkinin C	2	NA	NA	NA	NA	NA
LC.03.0457	Dihydroisocangorosin A__2	2	NA	NA	NA	NA	NA
LC.03.0458	(2E)-19-hydroxynonadec-2-enoic acid__1	2	Organic compounds	Lipids and lipid-like molecules	Fatty Acyls	Fatty acids and conjugates	Long-chain fatty acids
LC.03.0459	Racemoside C;(-)-Racemoside C__1	2	NA	NA	NA	NA	NA
LC.03.0460	Pregnanetriol	2	Organic compounds	Lipids and lipid-like molecules	Steroids and steroid derivatives	Pregnane steroids	Gluco/mineralocorticoids, progestogins and derivatives
LC.03.0461	UNPD150620	2	NA	NA	NA	NA	NA
LC.03.0462	1-18:2-2-18:2-monogalactosyldiacylglycerol__1	2	NA	NA	NA	NA	NA
LC.03.0463	Argentinic acid G__2	2	NA	NA	NA	NA	NA
LC.03.0464	TG(18:1(9Z)/18:1(9Z)/20:0)	2	Organic compounds	Lipids and lipid-like molecules	Glycerolipids	Triradylcglycerols	Triacylglycerols
LC.03.0465	1-O-(6-acetamido-6-deoxy-alpha-D-galactosyl)-N-[(15Z)-tetracos-15-enoyl]phytosphingosine	2	Organic compounds	Lipids and lipid-like molecules	Fatty Acyls	Fatty acyl glycosides	Fatty acyl glycosides of mono- and disaccharides
LC.03.0466	C12H45N23O17P2	3	NA	NA	NA	NA	NA
LC.03.0469	C16H28NO9P3S14	3	NA	NA	NA	NA	NA
LC.03.0471	C57H108O7	3	NA	NA	NA	NA	NA
LC.03.0472	TG(18:3(9Z,12Z,15Z)/18:3(9Z,12Z,15Z)/22:5(7Z,10Z,13Z,16Z,19Z))	2	Organic compounds	Lipids and lipid-like molecules	Glycerolipids	Triradylcglycerols	Triacylglycerols
LC.03.0473	UNPD199213	2	NA	NA	NA	NA	NA
LC.03.0474	Pregnanetriol	2	Organic compounds	Lipids and lipid-like molecules	Steroids and steroid derivatives	Pregnane steroids	Gluco/mineralocorticoids, progestogins and derivatives
LC.03.0475	Cholesteryl acetate	2	Organic compounds	Lipids and lipid-like molecules	Steroids and steroid derivatives	Steroid esters	Cholesteryl esters
LC.03.0476	PA(20:3(8Z,11Z,14Z)/20:0)	2	Organic compounds	Lipids and lipid-like molecules	Glycerophospholipids	Glycerophosphates	1,2-diacylglycerol-3-phosphates
LC.03.0477	PC(34:0)	2	Organic compounds	Lipids and lipid-like molecules	Glycerophospholipids	Glycerophosphocholines	Phosphatidylcholines
LC.03.0478	PC(34:3)	2	Organic compounds	Lipids and lipid-like molecules	Glycerophospholipids	Glycerophosphocholines	Phosphatidylcholines
LC.03.0479	UNPD70752	2	NA	NA	NA	NA	NA
LC.03.0480	1-18:3-2-18:2-monogalactosyldiacylglycerol	2	NA	NA	NA	NA	NA
LC.03.0481	UNPD105013	2	NA	NA	NA	NA	NA
LC.03.0482	12,13-EpOME	2	NA	NA	NA	NA	NA
LC.03.0483	C43H77O9P	3	NA	NA	NA	NA	NA
LC.03.0484	1-O-stearoyl-N-acetylsphingosine	2	NA	NA	NA	NA	NA
LC.03.0486	zeta-Carotene epoxide	2	NA	NA	NA	NA	NA
LC.03.0487	UNPD130718	2	NA	NA	NA	NA	NA
LC.03.0488	N-arachidonoylsphinganine	2	Organic compounds	Lipids and lipid-like molecules	Sphingolipids	Ceramides	Long-chain ceramides
LC.03.0489	UNPD218450__2	2	Organic compounds	Organic oxygen compounds	Organooxygen compounds	Alcohols and polyols	Secondary alcohols
LC.03.0490	UNPD210697	2	Organic compounds	Organic oxygen compounds	Organooxygen compounds	Alcohols and polyols	Secondary alcohols
LC.03.0491	N-2-hydroxy-henicosanoyl-15-methylhexadecasphing-4-enine-1-phosphocholine	2	NA	NA	NA	NA	NA
LC.03.0492	C13H41N17O21	3	NA	NA	NA	NA	NA
LC.03.0493	C23H64N17O2P	3	NA	NA	NA	NA	NA
LC.03.0494	C9H33N17O17S	3	NA	NA	NA	NA	NA
LC.03.0495	PE(36:4)	2	Organic compounds	Lipids and lipid-like molecules	Glycerophospholipids	Glycerophosphoethanolamines	Phosphatidylethanolamines
LC.03.0497	PE(34:2)	2	Organic compounds	Lipids and lipid-like molecules	Glycerophospholipids	Glycerophosphoethanolamines	Phosphatidylethanolamines
LC.03.0498	C14H30N28O35P6S2	3	NA	NA	NA	NA	NA
LC.03.0499	3b,17b-Dihydroxyetiocholane	2	Organic compounds	Lipids and lipid-like molecules	Steroids and steroid derivatives	Androstane steroids	Androgens and derivatives
LC.03.0500	Picrocrocin	2	Organic compounds	Organic oxygen compounds	Organooxygen compounds	Carbohydrates and carbohydrate conjugates	O-glycosyl compounds
LC.03.0501	DG(36:1)	2	Organic compounds	Lipids and lipid-like molecules	Glycerolipids	Diradylglycerols	1,2-diacylglycerols
LC.03.0502	PG(36:3)	2	Organic compounds	Lipids and lipid-like molecules	Glycerophospholipids	Glycerophosphoglycerols	Phosphatidylglycerols
LC.03.0503	CL(72:4)	2	Organic compounds	Lipids and lipid-like molecules	Glycerophospholipids	Glycerophosphoglycerophosphoglycerols	Cardiolipins
LC.03.0504	PG(36:5)	2	Organic compounds	Lipids and lipid-like molecules	Glycerophospholipids	Glycerophosphoglycerols	Phosphatidylglycerols
LC.03.0505	PE(36:3)	2	Organic compounds	Lipids and lipid-like molecules	Glycerophospholipids	Glycerophosphoethanolamines	Phosphatidylethanolamines
LC.03.0506	DG(36:5)	2	Organic compounds	Lipids and lipid-like molecules	Glycerolipids	Diradylglycerols	1,2-diacylglycerols
LC.03.0507	90658623	2	Organic compounds	Lipids and lipid-like molecules	Prenol lipids	Triterpenoids	Triterpenoids
LC.03.0508	3-O-(alpha-L-olivosyl)erythronolide B	2	Organic compounds	Phenylpropanoids and polyketides	Macrolides and analogues	NA	Macrolides and analogues
LC.03.0509	Leukotriene B4	2	Organic compounds	Lipids and lipid-like molecules	Fatty Acyls	Eicosanoids	Leukotrienes
LC.03.0510	6alpha-Malonyloxymanoyl oxide;(+)-6alpha-Malonyloxymanoyl oxide__1	2	NA	NA	NA	NA	NA
LC.03.0511	LPC(16:1)	2	Organic compounds	Lipids and lipid-like molecules	Glycerophospholipids	Glycerophosphocholines	1-acyl-sn-glycero-3-phosphocholines
LC.03.0512	(E)-3-(4-Hydroxyphenyl)-2-propenal	2	Organic compounds	Phenylpropanoids and polyketides	Cinnamaldehydes	NA	Cinnamaldehydes
LC.03.0513	N-[(2R,3S)-2-[[cyclopropylmethyl(methyl)amino]methyl]-5-[(2S)-1-hydroxypropan-2-yl]-3-methyl-6-oxo-2,3,4,7-tetrahydro-1,5-benzoxazonin-9-yl]-3-(4-morpholinyl)propanamide	2	NA	NA	NA	NA	NA
LC.03.0514	C8H27N11O18S5	3	NA	NA	NA	NA	NA
LC.03.0515	UNPD19812	2	NA	NA	NA	NA	NA
LC.03.0516	Tetrahydrocorticosterone	2	Organic compounds	Lipids and lipid-like molecules	Steroids and steroid derivatives	Hydroxysteroids	21-hydroxysteroids
LC.03.0517	UNPD159016	2	NA	NA	NA	NA	NA
LC.03.0518	Discarine H	2	NA	NA	NA	NA	NA
LC.03.0519	(R)-2-Hydroxysterculic acid	2	NA	NA	NA	NA	NA
LC.03.0520	(R)-2-Hydroxysterculic acid	2	NA	NA	NA	NA	NA
LC.03.0521	Oleamide	2	Organic compounds	Lipids and lipid-like molecules	Fatty Acyls	Fatty amides	Fatty amides
LC.03.0522	1-Palmitoylglycerophosphoinositol	2	Organic compounds	Lipids and lipid-like molecules	Glycerophospholipids	Glycerophosphoinositols	1-acyl-sn-glycerol-3-phosphoinositols
LC.03.0523	C12H36N11O28P3S12	3	NA	NA	NA	NA	NA
LC.03.0524	C13H50N16O32P4S4	3	NA	NA	NA	NA	NA
LC.03.0525	mifamurtide__2	2	NA	NA	NA	NA	NA
LC.03.0526	2-(2,4-dimethoxyphenyl)-N-[1-(2-furanyl)ethylideneamino]-4-quinolinecarboxamide	2	Organic compounds	Organoheterocyclic compounds	Quinolines and derivatives	Phenylquinolines	Phenylquinolines
LC.03.0527	UNPD130059	2	NA	NA	NA	NA	NA
LC.03.0528	UNPD102123	2	NA	NA	NA	NA	NA
LC.03.0529	1-Phenyl-1,2-propanedione	2	Organic compounds	Benzenoids	Benzene and substituted derivatives	Phenylpropanes	Phenylpropanes
LC.03.0530	isoxathion	2	Organic compounds	Phenylpropanoids and polyketides	Cinnamic acids and derivatives	Hydroxycinnamic acids and derivatives	Avenanthramides
LC.03.0531	1-Phenyl-1,2-propanedione	2	Organic compounds	Benzenoids	Benzene and substituted derivatives	Phenylpropanes	Phenylpropanes
LC.03.0532	Dehydrovomifoliol	2	NA	NA	NA	NA	NA
LC.03.0533	C00051713	2	NA	NA	NA	NA	NA
LC.03.0534	Quinomycin A	2	Organic compounds	Organic acids and derivatives	Peptidomimetics	Depsipeptides	Cyclic depsipeptides
LC.03.0535	Australigenin	2	NA	NA	NA	NA	NA
LC.03.0536	Drosophilin D	2	Organic compounds	Benzenoids	Naphthalenes	Naphthoquinones	Naphthoquinones
LC.03.0537	Sarsasapogenin	2	Organic compounds	Lipids and lipid-like molecules	Prenol lipids	Triterpenoids	Triterpenoids
LC.03.0538	Prostaglandin E2	2	Organic compounds	Organoheterocyclic compounds	Piperidines	Phenylpiperidines	Phenylpiperidines
LC.03.0539	UNPD179837	2	Organic compounds	Phenylpropanoids and polyketides	Cinnamic acids and derivatives	Hydroxycinnamic acids and derivatives	Coumaric acids and derivatives
LC.03.0540	Indole-3-acrylic acid	2	Organic compounds	Organoheterocyclic compounds	Indoles and derivatives	Indoles	Indoles
LC.03.0541	1H-Indole-3-carboxaldehyde	2	Organic compounds	Organoheterocyclic compounds	Indoles and derivatives	Indoles	Indoles
LC.03.0542	C16H13N3O9S2	3	NA	NA	NA	NA	NA
LC.03.0543	Adenosine	2	Organic compounds	Nucleosides, nucleotides, and analogues	Purine nucleosides	NA	Purine nucleosides
LC.03.0544	caerulomycinamide	2	Organic compounds	Organoheterocyclic compounds	Pyridines and derivatives	Bipyridines and oligopyridines	Bipyridines and oligopyridines
LC.03.0545	dTDP-4-formamido-4,6-dideoxy-alpha-D-glucose(2-)	2	NA	NA	NA	NA	NA
LC.03.0546	tricin 4'-O-(threo-beta-guaiacylglyceryl) ether 7-O-beta-D-glucopyranoside__2	2	NA	NA	NA	NA	NA
LC.03.0547	Azinomycin A;Carzinophilin B__1	2	NA	NA	NA	NA	NA
LC.03.0548	Isoproterenol	2	Organic compounds	Benzenoids	Phenols	Benzenediols	Catechols
LC.03.0549	glycerophosphoglycerol	2	NA	NA	NA	NA	NA
LC.03.0550	Inositol cyclic phosphate	2	Organic compounds	Organic acids and derivatives	Organic phosphoric acids and derivatives	NA	Organic phosphoric acids and derivatives
LC.03.0551	Serotinose	2	NA	NA	NA	NA	NA
LC.03.0552	Salignarine A;(+)-Salignarine A	2	NA	NA	NA	NA	NA
LC.03.0553	MG(18:1)	2	Organic compounds	Lipids and lipid-like molecules	Glycerolipids	Monoradylglycerols	2-monoacylglycerols
LC.03.0554	Uric acid	2	Organic compounds	Organoheterocyclic compounds	Imidazopyrimidines	Purines and purine derivatives	Xanthines
LC.03.0555	C17H68N33O36P7S9	3	NA	NA	NA	NA	NA
LC.03.0556	3b-Pregnadienolone 3-[rhamnosyl-(1->4)-rhamnosyl-(1->4)-rhamnosyl-(1->4)-glucoside]	2	NA	NA	NA	NA	NA
LC.03.0557	Coriaheptocin A;(+)-Coriaheptocin A	2	NA	NA	NA	NA	NA
LC.03.0558	Caratuberside C;(+)-Caratuberside C	2	NA	NA	NA	NA	NA
LC.03.0559	Argentinic acid G__3	2	NA	NA	NA	NA	NA
LC.03.0560	Cohibin C	2	NA	NA	NA	NA	NA
LC.03.0562	C14H5N2O24P7S13	3	NA	NA	NA	NA	NA
LC.03.0564	(9S)-erythromycyclamine__2	2	Organic compounds	Organic oxygen compounds	Organooxygen compounds	Carbohydrates and carbohydrate conjugates	Aminoglycosides
LC.03.0566	C19H6O36S4	3	NA	NA	NA	NA	NA
LC.03.0569	C8H12N16O16P4S6	3	NA	NA	NA	NA	NA
LC.03.0573	(9S)-erythromycyclamine__3	2	Organic compounds	Organic oxygen compounds	Organooxygen compounds	Carbohydrates and carbohydrate conjugates	Aminoglycosides
LC.03.0575	C9H32N4O22P4S8	3	NA	NA	NA	NA	NA
LC.03.0576	C17H36N11O42P7S15	3	NA	NA	NA	NA	NA
LC.03.0578	Glycerol 1,2-di-(9Z-octadecenoate) 3-tetradecanoate	2	NA	NA	NA	NA	NA
LC.03.0580	Salzmanolin	2	NA	NA	NA	NA	NA
LC.03.0581	PI(22:0/22:4(7Z,10Z,13Z,16Z))	2	NA	NA	NA	NA	NA
LC.03.0582	C34H68N2O2	3	NA	NA	NA	NA	NA
LC.03.0583	MGDG(18:3(9Z,12Z,15Z)/18:3(9Z,12Z,15Z))	2	Organic compounds	Lipids and lipid-like molecules	Glycerolipids	Glycosylglycerols	1,2-diacyl-3-O-beta-D-galactosyl-sn-glycerols
LC.03.0585	C14H27N10O14P5S12	3	NA	NA	NA	NA	NA
LC.03.0586	(3beta,5alpha,6alpha,9alpha,22E,24R)-Ergosta-7,22-diene-3,5,6,9-tetrol	2	NA	NA	NA	NA	NA
LC.03.0587	PC(38:2)	2	Organic compounds	Lipids and lipid-like molecules	Glycerophospholipids	Glycerophosphocholines	Phosphatidylcholines
LC.03.0589	PC(38:3)	2	Organic compounds	Lipids and lipid-like molecules	Glycerophospholipids	Glycerophosphocholines	1-alkyl,2-acylglycero-3-phosphocholines
LC.03.0590	C38H83NO5S	3	NA	NA	NA	NA	NA
LC.03.0591	CL(20:4(5Z,8Z,11Z,14Z)/16:1(9Z)/22:6(4Z,7Z,10Z,13Z,16Z,19Z)/22:6(4Z,7Z,10Z,13Z,16Z,19Z))	2	Organic compounds	Lipids and lipid-like molecules	Glycerophospholipids	Glycerophosphoglycerophosphoglycerols	Cardiolipins
LC.03.0592	DG(32:1)	2	Organic compounds	Lipids and lipid-like molecules	Glycerolipids	Diradylglycerols	1,2-diacylglycerols
LC.03.0593	UNPD30857	2	NA	NA	NA	NA	NA
LC.03.0594	N-acetyl-D-glucosaminyl-(1->4)-N-acetylmuramoyl-L-alanyl-D-glutamyl-6-carboxy-L-lysine	2	Organic compounds	Organic acids and derivatives	Carboxylic acids and derivatives	Amino acids, peptides, and analogues	Peptides
LC.03.0595	C12H38N11O27P5S8	3	NA	NA	NA	NA	NA
LC.03.0597	UNPD65646	2	NA	NA	NA	NA	NA
LC.03.0598	PE(36:2)	2	Organic compounds	Lipids and lipid-like molecules	Glycerophospholipids	Glycerophosphoethanolamines	Phosphatidylethanolamines
LC.03.0599	C12H28N15O30P3S7	3	NA	NA	NA	NA	NA
LC.03.0600	PE-NMe(24:1(15Z)/24:0)	2	Organic compounds	Lipids and lipid-like molecules	Glycerophospholipids	Glycerophosphoethanolamines	Monomethylphosphatidylethanolamines
LC.03.0601	C12H41N15O29P4S9	3	NA	NA	NA	NA	NA
LC.03.0602	Polyoxyethylene (600) monoricinoleate	2	NA	NA	NA	NA	NA
LC.03.0603	(Z)-18-hydroxyoctadec-9-enoic acid [(Z)-18-[(2S)-3-hydroxy-2-[(9Z,12Z)-18-hydroxyoctadeca-9,12-dienoyl]oxy-propoxy]-18-keto-octadec-9-enyl] ester	2	Organic compounds	Lipids and lipid-like molecules	Fatty Acyls	Fatty acid esters	Wax monoesters
LC.03.0604	Phytosphingosine	2	NA	NA	NA	NA	NA
LC.03.0605	Cytochalasin Npho	2	NA	NA	NA	NA	NA
LC.03.0606	Aldecalmycin	2	NA	NA	NA	NA	NA
LC.03.0607	18-hydroxy-9R,10S-epoxy-stearic acid	2	NA	NA	NA	NA	NA
LC.03.0608	Benzquinamide	2	Organic compounds	Organoheterocyclic compounds	Diazinanes	Piperazines	N-arylpiperazines
LC.03.0609	Avenacin A-1__2	2	NA	NA	NA	NA	NA
LC.03.0610	Talinumoside I	2	NA	NA	NA	NA	NA
LC.03.0611	UNPD93523	2	NA	NA	NA	NA	NA
LC.03.0612	LPE(18:1)	2	Organic compounds	Lipids and lipid-like molecules	Glycerophospholipids	Glycerophosphoethanolamines	1-acyl-sn-glycero-3-phosphoethanolamines
LC.03.0613	tributyl phosphate	2	Organic compounds	Organic acids and derivatives	Organic phosphoric acids and derivatives	Phosphate esters	Trialkyl phosphates
LC.03.0614	Hexacosanoyl carnitine	2	NA	NA	NA	NA	NA
LC.03.0616	Antibiotic BU 3862T;Eponemycin	2	NA	NA	NA	NA	NA
LC.03.0617	Pregnanetriol	2	Organic compounds	Lipids and lipid-like molecules	Steroids and steroid derivatives	Pregnane steroids	Gluco/mineralocorticoids, progestogins and derivatives
LC.03.0618	Ophiopogonin C'	2	NA	NA	NA	NA	NA
LC.03.0619	Morellinol	2	NA	NA	NA	NA	NA
LC.03.0620	LPC(16:0)	2	Organic compounds	Lipids and lipid-like molecules	Glycerophospholipids	Glycerophosphocholines	1-acyl-sn-glycero-3-phosphocholines
LC.03.0621	(1R*,ZR*,3E,7R*.8E,llR*,l2S*)-3.8-dolabelladiene-2,7,16,18-tetrol-7-O-beta-D-glucopyranoside	2	NA	NA	NA	NA	NA
LC.03.0622	ent-7alpha-hydroxykaur-16-en-19-oic acid	2	NA	NA	NA	NA	NA
LC.03.0623	Pregnanetriol	2	Organic compounds	Lipids and lipid-like molecules	Steroids and steroid derivatives	Pregnane steroids	Gluco/mineralocorticoids, progestogins and derivatives
LC.03.0624	LPC(20:1)	2	Organic compounds	Lipids and lipid-like molecules	Glycerophospholipids	Glycerophosphocholines	1-acyl-sn-glycero-3-phosphocholines
LC.03.0625	PE(36:5)	2	Organic compounds	Lipids and lipid-like molecules	Glycerophospholipids	Glycerophosphoethanolamines	1-(1Z-alkenyl),2-acylglycerophosphoethanolamines
LC.03.0626	Amoritin	2	NA	NA	NA	NA	NA
LC.03.0627	5-Hydroxy-4-methoxy-3-methyl-2,6-canthinedione	2	Organic compounds	Alkaloids and derivatives	Indolonaphthyridine alkaloids	NA	Indolonaphthyridine alkaloids
LC.03.0628	C22H31N26O42PS16	3	NA	NA	NA	NA	NA
LC.03.0629	C12H47N23O28P2S6	3	NA	NA	NA	NA	NA
LC.03.0630	4-Hydroxy-5-(3',4'-dihydroxyphenyl)-valeric acid-O-glucuronide	2	NA	NA	NA	NA	NA
LC.03.0631	C45H80N7O21P3S2	3	NA	NA	NA	NA	NA
LC.03.0632	C14H6N2O35P2S14	3	NA	NA	NA	NA	NA
LC.03.0633	C52O36S2	3	NA	NA	NA	NA	NA
LC.03.0634	UNPD68791__1	2	NA	NA	NA	NA	NA
LC.03.0635	C45H78N12O28P2	3	NA	NA	NA	NA	NA
LC.03.0636	5'-Phosphoribosyl-N-formylglycinamide	2	NA	NA	NA	NA	NA
LC.03.0637	4-[6-[4-(methoxycarbonylamino)phenyl]-4-(4-morpholinyl)-1-pyrazolo[3,4-d]pyrimidinyl]-1-piperidinecarboxylic acid methyl ester	2	Organic compounds	Benzenoids	Benzene and substituted derivatives	Phenylcarbamic acid esters	Phenylcarbamic acid esters
LC.03.0638	C14H55N24O32P7S	3	NA	NA	NA	NA	NA
LC.03.0639	bruceolline K	2	NA	NA	NA	NA	NA
LC.03.0640	Herniarin	2	Organic compounds	Phenylpropanoids and polyketides	Coumarins and derivatives	NA	Coumarins and derivatives
LC.03.0641	Dihydrosphaerolone	2	NA	NA	NA	NA	NA
LC.03.0642	Prostaglandin E2	2	Organic compounds	Organoheterocyclic compounds	Piperidines	Phenylpiperidines	Phenylpiperidines
LC.03.0643	Prostaglandin G2	2	NA	NA	NA	NA	NA
LC.03.0644	PE(O-18:0/20:0)	2	NA	NA	NA	NA	NA
LC.03.0645	C24H79N43O2	3	NA	NA	NA	NA	NA
LC.03.0646	Xylobiose	2	NA	NA	NA	NA	NA
LC.03.0647	Sucrose	2	Organic compounds	Benzenoids	Benzene and substituted derivatives	Diphenylethers	Diphenylethers
LC.03.0648	6-Aminopenicillanic acid	2	Organic compounds	Organic acids and derivatives	Carboxylic acids and derivatives	Amino acids, peptides, and analogues	Dipeptides
LC.03.0649	Gentisic acid	2	Organic compounds	Organoheterocyclic compounds	Benzodiazepines	1,4-benzodiazepines	1,2,4-triazolo[4,3-a][1,4]benzodiazepines
LC.03.0650	N-Acetylneuraminic acid	2	NA	NA	NA	NA	NA
LC.03.0651	UNPD41697	2	NA	NA	NA	NA	NA
LC.03.0652	C45H74N7O21P3S	3	NA	NA	NA	NA	NA
LC.03.0653	Scopolamine	2	Organic compounds	Organic acids and derivatives	Hydroxy acids and derivatives	Beta hydroxy acids and derivatives	Beta hydroxy acids and derivatives
LC.03.0654	Betaine	2	NA	NA	NA	NA	NA
LC.03.0655	mifamurtide__3	2	NA	NA	NA	NA	NA
LC.03.0656	Choline	2	Organic compounds	Organic nitrogen compounds	Organonitrogen compounds	Quaternary ammonium salts	Cholines
LC.03.0657	7-Hydroxy-5-methoxyflavan	2	NA	NA	NA	NA	NA
LC.03.0658	L-Threonine	2	NA	NA	NA	NA	NA
LC.03.0659	Montecristin	2	NA	NA	NA	NA	NA
LC.03.0660	(9S)-erythromycyclamine__4	2	Organic compounds	Organic oxygen compounds	Organooxygen compounds	Carbohydrates and carbohydrate conjugates	Aminoglycosides
LC.03.0661	UNPD101598__2	2	NA	NA	NA	NA	NA
LC.03.0662	Nutriacholic acid	2	Organic compounds	Lipids and lipid-like molecules	Steroids and steroid derivatives	Bile acids, alcohols and derivatives	Monohydroxy bile acids, alcohols and derivatives
LC.03.0663	Timosaponin AIII	2	NA	NA	NA	NA	NA
LC.03.0664	LPE(18:1)	2	Organic compounds	Lipids and lipid-like molecules	Glycerophospholipids	Glycerophosphoethanolamines	1-acyl-sn-glycero-3-phosphoethanolamines
LC.03.0665	Orthosiphol D	2	NA	NA	NA	NA	NA
LC.03.0666	Batatasin IV	2	Organic compounds	Phenylpropanoids and polyketides	Stilbenes	NA	Stilbenes
LC.03.0667	Pregnanetriol	2	Organic compounds	Lipids and lipid-like molecules	Steroids and steroid derivatives	Pregnane steroids	Gluco/mineralocorticoids, progestogins and derivatives
LC.03.0669	1-18:2-2-18:2-monogalactosyldiacylglycerol__2	2	NA	NA	NA	NA	NA
LC.03.0670	bacteriopheophytin a	2	NA	NA	NA	NA	NA
LC.03.0671	1,2-Di-(9Z,12Z,15Z-octadecatrienoyl)-3-(Galactosyl-alpha-1-6-Galactosyl-beta-1)-glycerol	2	Organic compounds	Lipids and lipid-like molecules	Glycerolipids	Glycosylglycerols	Glycosyldiacylglycerols
LC.03.0672	TG(16:0/18:0/18:0)	2	Organic compounds	Lipids and lipid-like molecules	Glycerolipids	Triradylcglycerols	Triacylglycerols
LC.03.0673	Montecristin	2	NA	NA	NA	NA	NA
LC.03.0674	Cohibin C	2	NA	NA	NA	NA	NA
LC.03.0676	DAT(19:0/23:0(2Me[S],3OH[S],4Me[S],6Me[S]))	2	NA	NA	NA	NA	NA
LC.03.0677	C10H20N19O16P3S9	3	NA	NA	NA	NA	NA
LC.03.0678	TG(52:6)	2	Organic compounds	Lipids and lipid-like molecules	Glycerolipids	Triradylcglycerols	Triacylglycerols
LC.03.0680	C10H15N17O22P4S6	3	NA	NA	NA	NA	NA
LC.03.0682	TG(18:1(9Z)/18:3(9Z,12Z,15Z)/18:4(6Z,9Z,12Z,15Z))	2	Organic compounds	Lipids and lipid-like molecules	Glycerolipids	Triradylcglycerols	Triacylglycerols
LC.03.0684	C9H19N17O19P2S9	3	NA	NA	NA	NA	NA
LC.03.0685	C11H9N21O14P4S7	3	NA	NA	NA	NA	NA
LC.03.0686	TG(14:0/14:0/14:0)	2	Organic compounds	Lipids and lipid-like molecules	Glycerolipids	Triradylcglycerols	Triacylglycerols
LC.03.0688	C10H26NO24P5S9	3	NA	NA	NA	NA	NA
LC.03.0689	heptadecaprenyl diphosphate	2	NA	NA	NA	NA	NA
LC.03.0690	TG(16:1(9Z)/16:1(9Z)/16:1(9Z))	2	Organic compounds	Lipids and lipid-like molecules	Glycerolipids	Triradylcglycerols	Triacylglycerols
LC.03.0692	C10H5N7O24P2S7	3	NA	NA	NA	NA	NA
LC.03.0694	PA(22:4(7Z,10Z,13Z,16Z)/15:0)	2	Organic compounds	Lipids and lipid-like molecules	Glycerophospholipids	Glycerophosphates	1,2-diacylglycerol-3-phosphates
LC.03.0695	TG(14:0/15:0/18:1(9Z))	2	Organic compounds	Lipids and lipid-like molecules	Glycerolipids	Triradylcglycerols	Triacylglycerols
LC.03.0700	PA(22:5(4Z,7Z,10Z,13Z,16Z)/15:0)	2	Organic compounds	Lipids and lipid-like molecules	Glycerophospholipids	Glycerophosphates	1,2-diacylglycerol-3-phosphates
LC.03.0701	C9H4N10O19P2S6	3	NA	NA	NA	NA	NA
LC.03.0702	TG(10:0/8:0/8:0)	2	Organic compounds	Lipids and lipid-like molecules	Glycerolipids	Triradylcglycerols	Triacylglycerols
LC.03.0703	PE(34:1)	2	Organic compounds	Lipids and lipid-like molecules	Glycerophospholipids	Glycerophosphoethanolamines	Phosphatidylethanolamines
LC.03.0704	DG(34:3)	2	Organic compounds	Lipids and lipid-like molecules	Fatty Acyls	Lineolic acids and derivatives	Lineolic acids and derivatives
LC.03.0705	UNPD167337	2	NA	NA	NA	NA	NA
LC.03.0706	Cer(d16:1(4E)/22:0(2OH))	2	NA	NA	NA	NA	NA
LC.03.0707	Holantosine B	2	NA	NA	NA	NA	NA
LC.03.0708	PC(32:1)	2	Organic compounds	Lipids and lipid-like molecules	Glycerophospholipids	Glycerophosphocholines	Phosphatidylcholines
LC.03.0709	Lucidenic acid C	2	NA	NA	NA	NA	NA
LC.03.0710	Squamocin L	2	NA	NA	NA	NA	NA
LC.03.0711	PE(32:0)	2	Organic compounds	Lipids and lipid-like molecules	Glycerophospholipids	Glycerophosphoethanolamines	Phosphatidylethanolamines
LC.03.0712	PC(36:1)	2	Organic compounds	Lipids and lipid-like molecules	Glycerophospholipids	Glycerophosphocholines	Phosphatidylcholines
LC.03.0713	Glucosylceramide (d18:1/9Z-18:1)	2	NA	NA	NA	NA	NA
LC.03.0714	Pregnanetriol	2	Organic compounds	Lipids and lipid-like molecules	Steroids and steroid derivatives	Pregnane steroids	Gluco/mineralocorticoids, progestogins and derivatives
LC.03.0715	Cer(d16:1(4E)/22:0(2OH))	2	NA	NA	NA	NA	NA
LC.03.0716	DG(36:7)	2	Organic compounds	Lipids and lipid-like molecules	Fatty Acyls	Lineolic acids and derivatives	Lineolic acids and derivatives
LC.03.0717	UNPD90942	2	NA	NA	NA	NA	NA
LC.03.0718	Glycerol 1,2-didodecanoate 3-tetradecanoate	2	NA	NA	NA	NA	NA
LC.03.0719	DG(40:2)	2	Organic compounds	Lipids and lipid-like molecules	Glycerolipids	Diradylglycerols	1,2-diacylglycerols
LC.03.0720	C10H22N19O17P3S9	3	NA	NA	NA	NA	NA
LC.03.0721	Cerebroside B	2	NA	NA	NA	NA	NA
LC.03.0722	UNPD99086	2	NA	NA	NA	NA	NA
LC.03.0723	TG(17:2(9Z,12Z)/20:5(5Z,8Z,11Z,14Z,17Z)/22:6(4Z,7Z,10Z,13Z,16Z,19Z))[iso6]	2	NA	NA	NA	NA	NA
LC.03.0724	Montecristin	2	NA	NA	NA	NA	NA
LC.03.0726	C10H2O11P4S8	3	NA	NA	NA	NA	NA
LC.03.0727	LSM-36728	2	NA	NA	NA	NA	NA
LC.03.0729	Cer(t18:0/22:0)	2	Organic compounds	Lipids and lipid-like molecules	Sphingolipids	Ceramides	Phytoceramides
LC.03.0731	TG(12:0/12:0/12:0)	2	Organic compounds	Lipids and lipid-like molecules	Glycerolipids	Triradylcglycerols	Triacylglycerols
LC.03.0733	Triricinolein	2	NA	NA	NA	NA	NA
LC.03.0735	CL(16:0/20:4(5Z,8Z,11Z,14Z)/18:0/18:0)	2	Organic compounds	Lipids and lipid-like molecules	Glycerophospholipids	Glycerophosphoglycerophosphoglycerols	Cardiolipins
LC.03.0736	(2E)-19-hydroxynonadec-2-enoic acid__2	2	Organic compounds	Lipids and lipid-like molecules	Fatty Acyls	Fatty acids and conjugates	Long-chain fatty acids
LC.03.0737	Montecristin	2	NA	NA	NA	NA	NA
LC.03.0738	UNPD22549__3	2	Organic compounds	Organoheterocyclic compounds	Pyrrolines	NA	Pyrrolines
LC.03.0739	Archaetidylglycerol-myo-inositol	2	NA	NA	NA	NA	NA
LC.03.0740	C11H29N19O26P2S10	3	NA	NA	NA	NA	NA
LC.03.0741	C11H27N18O11P5S10	3	NA	NA	NA	NA	NA
LC.03.0743	Glycerol 1,3-didodecanoate 2-decanoate	2	Organic compounds	Lipids and lipid-like molecules	Glycerolipids	Triradylcglycerols	Triacylglycerols
LC.03.0744	DG(34:0)	2	Organic compounds	Lipids and lipid-like molecules	Glycerolipids	Diradylglycerols	1,2-diacylglycerols
LC.03.0745	20:2-Glc-Campesterol	2	NA	NA	NA	NA	NA
LC.03.0747	UNPD119267	2	NA	NA	NA	NA	NA
LC.03.0748	PG(20:1(11Z)/22:1(11Z))	2	NA	NA	NA	NA	NA
LC.03.0749	Isomasticadienonalic acid	2	NA	NA	NA	NA	NA
LC.03.0750	C19H38N2O3	3	NA	NA	NA	NA	NA
LC.03.0751	UNPD168785__1	2	NA	NA	NA	NA	NA
LC.03.0752	3,4-Dihydro-2H-1-benzopyran-2-one	2	Organic compounds	Phenylpropanoids and polyketides	3,4-dihydrocoumarins	NA	3,4-dihydrocoumarins
LC.03.0753	UNPD57073	2	NA	NA	NA	NA	NA
LC.03.0754	C31H63N3O4	3	NA	NA	NA	NA	NA
LC.03.0755	UNPD201991	2	NA	NA	NA	NA	NA
LC.03.0756	N-2-hydroxypalmitoylsphingosine__1	2	NA	NA	NA	NA	NA
LC.03.0757	Aldoxycarb	2	Organic compounds	Organosulfur compounds	Sulfonyls	Sulfones	Sulfones
LC.03.0758	MG(18:3)	2	Organic compounds	Lipids and lipid-like molecules	Fatty Acyls	Lineolic acids and derivatives	Lineolic acids and derivatives
LC.03.0759	LysoPE(18:0/0:0)	2	Organic compounds	Lipids and lipid-like molecules	Glycerophospholipids	Glycerophosphoethanolamines	1-acyl-sn-glycero-3-phosphoethanolamines
LC.03.0760	N(6)-Methyllysine	2	Organic compounds	Organic acids and derivatives	Carboxylic acids and derivatives	Amino acids, peptides, and analogues	L-alpha-amino acids
LC.03.0761	C32H63NO4	3	NA	NA	NA	NA	NA
LC.03.0763	Australigenin	2	NA	NA	NA	NA	NA
LC.03.0764	UNPD166882	2	NA	NA	NA	NA	NA
LC.03.0765	ent-7alpha-hydroxykaur-16-en-19-oic acid	2	NA	NA	NA	NA	NA
LC.03.0766	Hexadecanedioic acid	2	Organic compounds	Lipids and lipid-like molecules	Fatty Acyls	Fatty acids and conjugates	Long-chain fatty acids
LC.03.0767	N-oleoylphytosphingosine	2	Organic compounds	Lipids and lipid-like molecules	Sphingolipids	Ceramides	Phytoceramides
LC.03.0768	1-O-palmitoyl-N-acetylsphingosine	2	NA	NA	NA	NA	NA
LC.03.0769	LMCer-1-1	2	NA	NA	NA	NA	NA
LC.03.0770	N-Stearoylsphingosine	2	NA	NA	NA	NA	NA
LC.03.0771	N-Oleoylethanolamine	2	Organic compounds	Organic nitrogen compounds	Organonitrogen compounds	Amines	N-acylethanolamines
LC.03.0772	Cer(d18:1/17:0)	2	Organic compounds	Lipids and lipid-like molecules	Sphingolipids	Ceramides	Long-chain ceramides
LC.03.0774	C8H23N15O14P2S5	3	NA	NA	NA	NA	NA
LC.03.0775	C13H49N25O26P6S3	3	NA	NA	NA	NA	NA
LC.03.0776	heptacosaethylene glycol	2	Organic compounds	Organic oxygen compounds	Organooxygen compounds	Ethers	Polyethylene glycols
LC.03.0777	C13H44N26O32S6	3	NA	NA	NA	NA	NA
LC.03.0778	EM 2487	2	NA	NA	NA	NA	NA
LC.03.0779	C17H35N27O41P6S13	3	NA	NA	NA	NA	NA
LC.03.0780	Avermectin B1b	2	Organic compounds	Phenylpropanoids and polyketides	Macrolides and analogues	NA	Macrolides and analogues
LC.03.0781	C41H57NO10	3	NA	NA	NA	NA	NA
LC.03.0782	C69H115N3O14P2	3	NA	NA	NA	NA	NA
LC.03.0783	C13H52N26O29S8	3	NA	NA	NA	NA	NA
LC.03.0784	UNPD68791__2	2	NA	NA	NA	NA	NA
LC.03.0785	Theasapogenol A	2	NA	NA	NA	NA	NA
LC.03.0786	C14H56N16O33P6S3	3	NA	NA	NA	NA	NA
LC.03.0787	Asebotoxin V	2	NA	NA	NA	NA	NA
LC.03.0788	UNPD54532	2	NA	NA	NA	NA	NA
LC.03.0789	Amphorogynine A;(+)-Amphorogynine A	2	NA	NA	NA	NA	NA
LC.03.0790	C13H30N26O32P4S8	3	NA	NA	NA	NA	NA
LC.03.0791	O-Methyl-1,2-didehydrotriphyophylline	2	NA	NA	NA	NA	NA
LC.03.0792	C16 Sphinganine	2	NA	NA	NA	NA	NA
LC.03.0793	3alpha-Angeloyloxy-2beta,15,16-trihydroxy-ent-labda-7,13E-dien-2-O-beta-[fucopyranoside-4'-O-acetate]	2	NA	NA	NA	NA	NA
LC.03.0794	Quadrangularic acid F;(+)-Quadrangularic acid F	2	NA	NA	NA	NA	NA
LC.03.0795	PS(20:0/0:0)	2	NA	NA	NA	NA	NA
LC.03.0796	Setarin	2	Organic compounds	Phenylpropanoids and polyketides	Coumarins and derivatives	NA	Coumarins and derivatives
LC.03.0797	Aspergillide A	2	NA	NA	NA	NA	NA
LC.03.0798	Agavoside B	2	NA	NA	NA	NA	NA
LC.03.0799	C12H12N24O30P2S12	3	NA	NA	NA	NA	NA
LC.03.0800	Zileuton	2	Organic compounds	Organoheterocyclic compounds	Benzothiophenes	1-benzothiophenes	1-benzothiophenes
LC.03.0802	Deidaclin	2	NA	NA	NA	NA	NA
LC.03.0803	Propranolol	2	NA	NA	NA	NA	NA
LC.03.0804	Estriol-16-Glucuronide	2	Organic compounds	Lipids and lipid-like molecules	Steroids and steroid derivatives	Steroidal glycosides	Steroidal glycosides
LC.03.0805	C15H54N21O26P	3	NA	NA	NA	NA	NA
LC.03.0807	Viscutin 1	2	NA	NA	NA	NA	NA
LC.03.0808	trizma acetate	2	Organic compounds	Organic nitrogen compounds	Organonitrogen compounds	Amines	1,2-aminoalcohols
LC.03.0809	C24H38N7O14P	3	NA	NA	NA	NA	NA
LC.03.0810	4-Pyridoxic acid	2	Organic compounds	Organoheterocyclic compounds	Pyridines and derivatives	Pyridinecarboxylic acids and derivatives	Pyridinecarboxylic acids
LC.03.0811	Phenylbenzimidazolesulfonic acid; LC-ESI-ITFT; MS2; CE	2	Organic compounds	Organoheterocyclic compounds	Benzimidazoles	Phenylbenzimidazoles	Phenylbenzimidazoles
LC.03.0812	C16H35N4O7P3S16	3	NA	NA	NA	NA	NA
LC.03.0814	UNPD7961	2	NA	NA	NA	NA	NA
LC.03.0815	UNPD76765	2	NA	NA	NA	NA	NA
LC.03.0816	Arachidonic acid	2	Organic compounds	Lipids and lipid-like molecules	Fatty Acyls	Fatty acids and conjugates	Long-chain fatty acids
LC.03.0817	UNPD83126	2	NA	NA	NA	NA	NA
LC.03.0818	7alpha-Methoxy-8-labdene-3beta,15-diol__2	2	NA	NA	NA	NA	NA
LC.03.0819	Uric acid	2	Organic compounds	Organoheterocyclic compounds	Imidazopyrimidines	Purines and purine derivatives	Xanthines
LC.03.0820	Apramide C	2	NA	NA	NA	NA	NA
LC.03.0821	7alpha-Methoxy-8-labdene-3beta,15-diol__3	2	NA	NA	NA	NA	NA
LC.03.0822	UNPD199413	2	NA	NA	NA	NA	NA
LC.03.0824	1-18:2-2-18:2-monogalactosyldiacylglycerol__3	2	NA	NA	NA	NA	NA
LC.03.0825	Enalkiren	2	Organic compounds	Organic acids and derivatives	Peptidomimetics	Hybrid peptides	Hybrid peptides
LC.03.0826	PE(36:5)	2	Organic compounds	Lipids and lipid-like molecules	Glycerophospholipids	Glycerophosphoethanolamines	Phosphatidylethanolamines
LC.03.0827	1-18:2-2-18:3-monogalactosyldiacylglycerol__2	2	NA	NA	NA	NA	NA
LC.03.0828	DG(34:3)	2	Organic compounds	Lipids and lipid-like molecules	Fatty Acyls	Lineolic acids and derivatives	Lineolic acids and derivatives
LC.03.0829	Tridodecylamine	2	Organic compounds	Organic nitrogen compounds	Organonitrogen compounds	Amines	Trialkylamines
LC.03.0830	C9H26N18O12P4S8	3	NA	NA	NA	NA	NA
LC.03.0832	1-palmityl-2-arachidonoyl-sn-glycerol__2	2	NA	NA	NA	NA	NA
LC.03.0833	(11Z,14Z,17Z)-3-oxoicosatrienoyl-CoA	2	Organic compounds	Lipids and lipid-like molecules	Fatty Acyls	Fatty acyl thioesters	Long-chain 3-oxoacyl CoAs
LC.03.0835	TG(14:0/15:0/18:2(9Z,12Z))	2	Organic compounds	Lipids and lipid-like molecules	Glycerolipids	Triradylcglycerols	Triacylglycerols
LC.03.0837	TG(16:0/16:1(9Z)/16:1(9Z))	2	Organic compounds	Lipids and lipid-like molecules	Glycerolipids	Triradylcglycerols	Triacylglycerols
LC.03.0838	C9H5N8O10P3S9	3	NA	NA	NA	NA	NA
LC.03.0840	TG(16:1(9Z)/16:1(9Z)/16:1(9Z))	2	Organic compounds	Lipids and lipid-like molecules	Glycerolipids	Triradylcglycerols	Triacylglycerols
LC.03.0841	C9H18N16O13P4S7	3	NA	NA	NA	NA	NA
LC.03.0844	Polyoxyethylene dioleate	2	Organic compounds	Lipids and lipid-like molecules	Fatty Acyls	Fatty acid esters	Fatty acid esters
LC.03.0845	UNPD80665	2	NA	NA	NA	NA	NA
LC.03.0846	PC(40:3)	2	Organic compounds	Lipids and lipid-like molecules	Glycerophospholipids	Glycerophosphocholines	Phosphatidylcholines
LC.03.0847	C11H14N13O27P3S8	3	NA	NA	NA	NA	NA
LC.03.0848	MGDG(18:3(9Z,12Z,15Z)/18:3(9Z,12Z,15Z))	2	Organic compounds	Lipids and lipid-like molecules	Glycerolipids	Glycosylglycerols	1,2-diacyl-3-O-beta-D-galactosyl-sn-glycerols
LC.03.0849	Muricatenol	2	NA	NA	NA	NA	NA
LC.03.0851	(R)-2-Hydroxysterculic acid	2	NA	NA	NA	NA	NA
LC.03.0852	Cer(d16:2(4E,6E)/20:0(2OH))	2	NA	NA	NA	NA	NA
LC.03.0853	Norselic acid A	2	NA	NA	NA	NA	NA
LC.03.0855	C61H100O13P2__2	3	NA	NA	NA	NA	NA
LC.03.0856	(3beta,5alpha,6alpha,9alpha,22E,24R)-Ergosta-7,22-diene-3,5,6,9-tetrol	2	NA	NA	NA	NA	NA
LC.03.0857	4-Hydroxy-16,18-tritriacontanedione	2	NA	NA	NA	NA	NA
LC.03.0858	LMCer-2-6	2	NA	NA	NA	NA	NA
LC.03.0859	KDNalpha2-3Galbeta1-4Glcbeta-Cer(d18:1/26:0)	2	NA	NA	NA	NA	NA
LC.03.0860	N-(2-hydroxytetracosanoyl)-15-methylhexadecasphing-4-enine	2	NA	NA	NA	NA	NA
LC.03.0861	alpha-Tocopherol acetate	2	NA	NA	NA	NA	NA
LC.03.0863	C14H56N21O24P3	3	NA	NA	NA	NA	NA
LC.03.0864	18:0-Glc-Sitosterol	2	Organic compounds	Lipids and lipid-like molecules	Steroids and steroid derivatives	Stigmastanes and derivatives	Stigmastanes and derivatives
LC.03.0865	Sitoindoside II	2	NA	NA	NA	NA	NA
LC.03.0867	C12H41N23O21P6S7	3	NA	NA	NA	NA	NA
LC.03.0868	Ketospirilloxanthin	2	Organic compounds	Lipids and lipid-like molecules	Prenol lipids	Tetraterpenoids	Xanthophylls
LC.03.0869	Glycerol 1-(9Z-octadecenoate) 2-tetradecanoate 3-phosphate	2	NA	NA	NA	NA	NA
LC.03.0870	C35H53N7O16P2S	3	NA	NA	NA	NA	NA
LC.03.0871	PA(O-18:0/22:0)	2	NA	NA	NA	NA	NA
LC.03.0873	1,2-Dioctadecanoyl-3-(galactosyl-B-1-6-galactosyl-B-1)-glycerol	2	Organic compounds	Lipids and lipid-like molecules	Glycerolipids	Glycosylglycerols	Glycosyldiacylglycerols
LC.03.0874	PE(36:5)	2	Organic compounds	Lipids and lipid-like molecules	Glycerophospholipids	Glycerophosphoethanolamines	Phosphatidylethanolamines
LC.03.0875	(9S)-erythromycyclamine__5	2	Organic compounds	Organic oxygen compounds	Organooxygen compounds	Carbohydrates and carbohydrate conjugates	Aminoglycosides
LC.03.0876	UNPD56758	2	NA	NA	NA	NA	NA
LC.03.0877	tumonoic acid C	2	NA	NA	NA	NA	NA
LC.03.0879	UNPD86330	2	NA	NA	NA	NA	NA
LC.03.0880	Phosphocholine; LC-ESI-QTOF; MS2; CE	2	Organic compounds	Organic nitrogen compounds	Organonitrogen compounds	Quaternary ammonium salts	Phosphocholines
LC.03.0881	UNPD220706	2	Organic compounds	Lipids and lipid-like molecules	Prenol lipids	Diterpenoids	Acyclic diterpenoids
LC.03.0882	5-(1-hydroxypropan-2-yl)isolongifol-4-ene	2	NA	NA	NA	NA	NA
LC.03.0883	C00051385	2	NA	NA	NA	NA	NA
LC.03.0884	C31H61NO4	3	NA	NA	NA	NA	NA
LC.03.0885	6alpha-Malonyloxymanoyl oxide;(+)-6alpha-Malonyloxymanoyl oxide__2	2	NA	NA	NA	NA	NA
LC.03.0887	LPC(17:0)	2	Organic compounds	Lipids and lipid-like molecules	Glycerophospholipids	Glycerophosphocholines	1-acyl-sn-glycero-3-phosphocholines
LC.03.0888	Tetrahydrocorticosterone	2	Organic compounds	Lipids and lipid-like molecules	Steroids and steroid derivatives	Hydroxysteroids	21-hydroxysteroids
LC.03.0889	UNPD15692	2	Organic compounds	Organoheterocyclic compounds	Diazines	Pyrimidines and pyrimidine derivatives	Hydropyrimidines
LC.03.0890	Foroxymithine	2	NA	NA	NA	NA	NA
LC.03.0891	MG(18:1)	2	Organic compounds	Lipids and lipid-like molecules	Glycerolipids	Monoradylglycerols	2-monoacylglycerols
LC.03.0893	Fenpropimorph	2	NA	NA	NA	NA	NA
LC.03.0895	UNPD80537	2	NA	NA	NA	NA	NA
LC.03.0896	UNPD218650	2	Organic compounds	Organic acids and derivatives	Peptidomimetics	Depsipeptides	Cyclic depsipeptides
LC.03.0898	10-oxo-nonadecanoic acid	2	Organic compounds	Lipids and lipid-like molecules	Fatty Acyls	Fatty acids and conjugates	Long-chain fatty acids
LC.03.0899	8-[1-(1,3-benzodioxol-5-yl)-3-(1-piperidinyl)propyl]-5,7-dimethoxy-4-pentyl-1-benzopyran-2-one	2	NA	NA	NA	NA	NA
LC.03.0900	17,23-Epoxy-29-hydroxy-27-norlanost-8-ene-3,15,24-trione	2	NA	NA	NA	NA	NA
LC.03.0901	Kadlongilactone C__2	2	NA	NA	NA	NA	NA
LC.03.0903	C17H67N15O17P6S13	3	NA	NA	NA	NA	NA
LC.03.0904	C9H36N15O17PS6	3	NA	NA	NA	NA	NA
LC.03.0905	UNPD110336	2	NA	NA	NA	NA	NA
LC.03.0906	Corydaline;d-Corydaline;(+)-Corydaline	2	NA	NA	NA	NA	NA
LC.03.0907	Pirenzepine	2	Organic compounds	Organoheterocyclic compounds	Benzodiazepines	1,4-benzodiazepines	1,4-benzodiazepines
LC.03.0908	1-O-Sinapoylglucose	2	NA	NA	NA	NA	NA
LC.03.0909	TG(24:1(15Z)/o-18:0/20:3n6)	2	Organic compounds	Lipids and lipid-like molecules	Glycerolipids	Triradylcglycerols	Alkyldiacylglycerols
LC.03.0910	UNPD136040	2	NA	NA	NA	NA	NA
LC.03.0911	penicillanic acid	2	Organic compounds	Organic acids and derivatives	Carboxylic acids and derivatives	Amino acids, peptides, and analogues	Alpha amino acids and derivatives
LC.03.0913	Riboflavin	2	Organic compounds	Organoheterocyclic compounds	Pteridines and derivatives	Alloxazines and isoalloxazines	Flavins
LC.03.0915	Darlucin B	2	NA	NA	NA	NA	NA
LC.03.0916	Pantetheine	2	NA	NA	NA	NA	NA
LC.03.0917	UNPD225251	2	Organic compounds	Phenylpropanoids and polyketides	Diarylheptanoids	Cyclic diarylheptanoids	Meta,meta-bridged biphenyls
LC.03.0918	alpha-Sorinin	2	NA	NA	NA	NA	NA
LC.03.0920	Miraxanthin V	2	NA	NA	NA	NA	NA
LC.03.0921	Acetaminophen	2	Organic compounds	Benzenoids	Phenols	1-hydroxy-2-unsubstituted benzenoids	1-hydroxy-2-unsubstituted benzenoids
LC.03.0922	acetyldigoxin	2	NA	NA	NA	NA	NA
LC.03.0923	N-Caffeoyltryptophan	2	NA	NA	NA	NA	NA
LC.03.0924	Citreoisocoumarinol	2	NA	NA	NA	NA	NA
LC.03.0925	Helonioside B	2	NA	NA	NA	NA	NA
LC.03.0926	Avermectin B1b	2	Organic compounds	Phenylpropanoids and polyketides	Macrolides and analogues	NA	Macrolides and analogues
LC.03.0928	Moroidin	2	NA	NA	NA	NA	NA
LC.03.0929	C39H39NO18	3	NA	NA	NA	NA	NA
LC.03.0930	N-[[(4R,5R)-2-[(2S)-1-hydroxypropan-2-yl]-8-(2-methoxyphenyl)-4-methyl-1,1-dioxo-4,5-dihydro-3H-6,1$l^{6},2-benzoxathiazocin-5-yl]methyl]-N-methyl-3-pyridinecarboxamide	2	NA	NA	NA	NA	NA
LC.03.0931	(E)-3-(4-Hydroxyphenyl)-2-propenal	2	Organic compounds	Phenylpropanoids and polyketides	Cinnamaldehydes	NA	Cinnamaldehydes
LC.03.0932	(R)-Salsolinol	2	NA	NA	NA	NA	NA
LC.03.0933	bhos#26	2	Organic compounds	Lipids and lipid-like molecules	Fatty Acyls	Fatty acids and conjugates	Long-chain fatty acids
LC.03.0934	UNPD219478__1	2	Organic compounds	Lipids and lipid-like molecules	Prenol lipids	Triterpenoids	Limonoids
LC.03.0935	Prostaglandin D2-1-glyceryl ester	2	Organic compounds	Lipids and lipid-like molecules	Fatty Acyls	Eicosanoids	Prostaglandins and related compounds
LC.03.0936	N-[(2R,3R)-2-[[cyclohexylmethyl(methyl)amino]methyl]-5-[(2R)-1-hydroxypropan-2-yl]-3-methyl-6-oxo-2,3,4,7-tetrahydro-1,5-benzoxazonin-9-yl]-2-(1-tetrazolyl)acetamide	2	NA	NA	NA	NA	NA
LC.03.0937	isovaleryl diethylamide	2	Organic compounds	Lipids and lipid-like molecules	Fatty Acyls	Fatty amides	N-acyl amines
LC.03.0939	C2H3O3PS2	3	NA	NA	NA	NA	NA
LC.03.0940	M = 97.9544	NA	NA	NA	NA	NA	NA
LC.03.0941	nemorubicin	2	NA	NA	NA	NA	NA
LC.03.0942	Estriol-16-Glucuronide	2	Organic compounds	Lipids and lipid-like molecules	Steroids and steroid derivatives	Steroidal glycosides	Steroidal glycosides
LC.03.0943	2-Acetolactate	2	Organic compounds	Organic acids and derivatives	Carboxylic acids and derivatives	Amino acids, peptides, and analogues	Dipeptides
LC.03.0944	Amoxicillin	2	Organic compounds	Organoheterocyclic compounds	Lactams	Beta lactams	Penicillins
LC.03.0945	L-Glutamic acid 5-phosphate	2	Organic compounds	Organic acids and derivatives	Carboxylic acids and derivatives	Amino acids, peptides, and analogues	Glutamic acid and derivatives
LC.03.0946	4-Guanidinobutanoic acid	2	Organic compounds	Organic acids and derivatives	Carboxylic acids and derivatives	Amino acids, peptides, and analogues	Gamma amino acids and derivatives
LC.03.0948	Morphine	2	Organic compounds	Alkaloids and derivatives	Morphinans	NA	Morphinans
LC.03.0950	Scroside C	2	NA	NA	NA	NA	NA
LC.03.0951	6-(alpha-D-Glucosaminyl)-1D-myo-inositol	2	Organic compounds	Organic oxygen compounds	Organooxygen compounds	Carbohydrates and carbohydrate conjugates	Aminocyclitol glycosides
LC.03.0953	Citrulline	2	NA	NA	NA	NA	NA
LC.03.0955	C24H31N7O15P2	3	NA	NA	NA	NA	NA
LC.03.0956	C37H58N7O21P3S	3	NA	NA	NA	NA	NA
LC.03.0957	(2E)-3-(4-hydroxy-3-methoxyphenyl)prop-2-enal	2	Organic compounds	Benzenoids	Phenols	Methoxyphenols	Methoxyphenols
LC.03.0958	alpha-berbine	2	NA	NA	NA	NA	NA
LC.03.0960	C18O43S12	3	NA	NA	NA	NA	NA
LC.03.0961	4'-Methylliquiritigenin 7-rhamnoside	2	NA	NA	NA	NA	NA
LC.03.0962	C20H80N39O31PS2	3	NA	NA	NA	NA	NA
LC.03.0963	nuzhenide di (11-methyloleoside)	2	NA	NA	NA	NA	NA
LC.03.0964	C16H60N32O35P6S6	3	NA	NA	NA	NA	NA
LC.03.0965	N-(3-carboxypropanoyl)-N-hydroxyputrescine	2	Organic compounds	Lipids and lipid-like molecules	Fatty Acyls	Fatty acids and conjugates	Straight chain fatty acids
LC.03.0966	Sulcatone	2	Organic compounds	Organic oxygen compounds	Organooxygen compounds	Carbonyl compounds	Ketones
LC.03.0967	(R)-lipoic acid	2	NA	NA	NA	NA	NA
LC.03.0968	6-(2-ethenyl-5-hydroxyphenoxy)-3,4,5-trihydroxyoxane-2-carboxylic acid	2	NA	NA	NA	NA	NA
LC.03.0969	UNPD224125	2	Organic compounds	Organic oxygen compounds	Organooxygen compounds	Carbonyl compounds	Aryl alkyl ketones
LC.03.0970	Dimethyldisulfide	2	Organic compounds	Organosulfur compounds	Organic disulfides	Dialkyldisulfides	Dialkyldisulfides
LC.03.0971	C8H9N15O16P2	3	NA	NA	NA	NA	NA
LC.03.0972	2-Thiophenecarboxaldehyde	2	Organic compounds	Organic oxygen compounds	Organooxygen compounds	Carbonyl compounds	Aryl-aldehydes
LC.03.0973	L-2,3-Dihydrodipicolinate	2	NA	NA	NA	NA	NA
LC.03.0974	Azinomycin A;Carzinophilin B__2	2	NA	NA	NA	NA	NA
LC.03.0975	C6H23NO10P2S6	3	NA	NA	NA	NA	NA
LC.03.0977	DIBOA-Glc	2	NA	NA	NA	NA	NA
LC.03.0978	Dimethyldithiophosphate	2	Organic compounds	Organic acids and derivatives	Organic dithiophosphoric acids and derivatives	Dithiophosphate O-esters	Phosphorodithioic acid O,O-diesters
LC.03.0979	Cer(d16:2(4E,6E)/20:1(11Z)(2OH))	2	NA	NA	NA	NA	NA
LC.03.0980	Persin	2	NA	NA	NA	NA	NA
LC.03.0981	UNPD230062	2	Organic compounds	Alkaloids and derivatives	Hasubanan alkaloids	NA	Hasubanan alkaloids
LC.03.0982	Leustroducsin H	2	NA	NA	NA	NA	NA
LC.03.0983	UNPD209153	2	NA	NA	NA	NA	NA
LC.03.0984	MG(16:0)	2	Organic compounds	Lipids and lipid-like molecules	Glycerolipids	Monoradylglycerols	1-monoacylglycerols
LC.03.0986	Cynarasaponin H	2	NA	NA	NA	NA	NA
LC.03.0987	C48H85N2O20P	3	NA	NA	NA	NA	NA
LC.03.0988	Herbimycin B	2	NA	NA	NA	NA	NA
LC.03.0989	UNPD140830	2	NA	NA	NA	NA	NA
LC.03.0990	Heteranthin;(-)-Heteranthin	2	NA	NA	NA	NA	NA
LC.03.0993	Theasapogenol A	2	NA	NA	NA	NA	NA
LC.03.0994	C34H71N	3	NA	NA	NA	NA	NA
LC.03.0995	1-Stearoylglycerophosphoglycerol	2	NA	NA	NA	NA	NA
LC.03.0996	C53H94N7O16P	3	NA	NA	NA	NA	NA
LC.03.0997	7alpha-Methoxy-8-labdene-3beta,15-diol__4	2	NA	NA	NA	NA	NA
LC.03.0998	Erucic acid	2	Organic compounds	Lipids and lipid-like molecules	Fatty Acyls	Fatty acids and conjugates	Very long-chain fatty acids
LC.03.1000	Racemoside C;(-)-Racemoside C__2	2	NA	NA	NA	NA	NA
LC.03.1002	1-(2E,6E,10E-phytatrienyl)-2-(2E,6E10E-phytatrienyl)-sn-glycero-3-phosphocholine	2	NA	NA	NA	NA	NA
LC.03.1003	DG(36:5)	2	Organic compounds	Lipids and lipid-like molecules	Glycerolipids	Diradylglycerols	1,2-diacylglycerols
LC.03.1004	Bengamide H	2	NA	NA	NA	NA	NA
LC.03.1005	Pregnanetriol	2	Organic compounds	Lipids and lipid-like molecules	Steroids and steroid derivatives	Pregnane steroids	Gluco/mineralocorticoids, progestogins and derivatives
LC.03.1006	Melophlin H__2	2	Organic compounds	Organoheterocyclic compounds	Pyrrolidines	N-alkylpyrrolidines	N-alkylpyrrolidines
LC.03.1007	C10H16N2O25P4S9	3	NA	NA	NA	NA	NA
LC.03.1008	PC(34:4)	2	Organic compounds	Lipids and lipid-like molecules	Glycerophospholipids	Glycerophosphocholines	Phosphatidylcholines
LC.03.1009	Cer(d16:1(4E)/24:0(2OH))	2	NA	NA	NA	NA	NA
LC.03.1011	PC(16:0/20:4(6E,8Z,11Z,14Z)(5OH[S]))	2	Organic compounds	Lipids and lipid-like molecules	Glycerophospholipids	Glycerophosphocholines	Phosphatidylcholines
LC.03.1014	C12H23N23O30P6	3	NA	NA	NA	NA	NA
LC.03.1015	Isoannonacin A	2	NA	NA	NA	NA	NA
LC.03.1016	3-O-Caffeoyl-4-O-methylquinic acid	2	NA	NA	NA	NA	NA
LC.03.1017	C9H9N8O20P3S6	3	NA	NA	NA	NA	NA
LC.03.1021	C9H5N12O21P3S4	3	NA	NA	NA	NA	NA
LC.03.1023	Avocadyne 4-acetate	2	NA	NA	NA	NA	NA
LC.03.1024	4-Androstenediol	2	Organic compounds	Lipids and lipid-like molecules	Steroids and steroid derivatives	Androstane steroids	Androgens and derivatives
LC.03.1025	C39H66O6	3	NA	NA	NA	NA	NA
LC.03.1026	Episterol	2	Organic compounds	Lipids and lipid-like molecules	Steroids and steroid derivatives	Ergostane steroids	Ergosterols and derivatives
LC.03.1027	PE-NMe2(18:1(9Z)/18:1(9Z))	2	Organic compounds	Lipids and lipid-like molecules	Glycerophospholipids	Glycerophosphoethanolamines	Dimethylphosphatidylethanolamines
LC.03.1028	Stigmasterol	2	Organic compounds	Lipids and lipid-like molecules	Steroids and steroid derivatives	Stigmastanes and derivatives	Stigmastanes and derivatives
LC.03.1029	PG(P-20:0/20:4(5Z,8Z,11Z,14Z))	2	NA	NA	NA	NA	NA
LC.03.1030	Alpha-Linolenic acid	2	Organic compounds	Lipids and lipid-like molecules	Fatty Acyls	Lineolic acids and derivatives	Lineolic acids and derivatives
LC.03.1031	UNPD184210	2	NA	NA	NA	NA	NA
LC.03.1032	Delta 8,14 -Sterol	2	Organic compounds	Lipids and lipid-like molecules	Steroids and steroid derivatives	Ergostane steroids	Ergosterols and derivatives
LC.03.1033	PC(P-16:0/22:4(7Z,10Z,13Z,16Z))	2	NA	NA	NA	NA	NA
LC.03.1034	Davallioside A	2	NA	NA	NA	NA	NA
LC.03.1035	C23H63N23O	3	NA	NA	NA	NA	NA
LC.03.1036	UNPD194686	2	NA	NA	NA	NA	NA
LC.03.1037	Epomusenin A	2	NA	NA	NA	NA	NA
LC.03.1038	C38H79N	3	NA	NA	NA	NA	NA
LC.03.1039	Lactariamide A;(+)-Lactariamide A__2	2	NA	NA	NA	NA	NA
LC.03.1040	UNPD31882	2	Organic compounds	Phenylpropanoids and polyketides	Cinnamic acids and derivatives	Hydroxycinnamic acids and derivatives	Coumaric acids and derivatives
LC.03.1042	PI(O-16:0/18:2(9Z,12Z))	2	NA	NA	NA	NA	NA
LC.03.1043	DG(36:6)	2	Organic compounds	Lipids and lipid-like molecules	Fatty Acyls	Lineolic acids and derivatives	Lineolic acids and derivatives
LC.03.1044	Uvaricin	2	NA	NA	NA	NA	NA
LC.03.1045	PE-Cer(d16:2(4E,6E)/18:0(2OH))	2	NA	NA	NA	NA	NA
LC.03.1047	staphyloxanthin	2	Organic compounds	Lipids and lipid-like molecules	Prenol lipids	Triterpenoids	Triterpenoids
LC.03.1050	Azithromycin	2	Organic compounds	Organic oxygen compounds	Organooxygen compounds	Carbohydrates and carbohydrate conjugates	Aminoglycosides
LC.03.1051	Glucosylceramide (d18:1/9Z-18:1)	2	NA	NA	NA	NA	NA
LC.03.1052	Uvarigranin	2	NA	NA	NA	NA	NA
LC.03.1053	Cer(t18:0/16:0)	2	Organic compounds	Lipids and lipid-like molecules	Sphingolipids	Ceramides	Phytoceramides
LC.03.1055	C21H63N23O	3	NA	NA	NA	NA	NA
LC.03.1056	C33H77N7O3S	3	NA	NA	NA	NA	NA
LC.03.1057	UNPD184446	2	NA	NA	NA	NA	NA
LC.03.1058	C31H73N13OS	3	NA	NA	NA	NA	NA
LC.03.1059	1-O-linoleoyl-N-acetylsphingosine	2	NA	NA	NA	NA	NA
LC.03.1061	ubiquinol-7	2	Organic compounds	Lipids and lipid-like molecules	Prenol lipids	Quinone and hydroquinone lipids	Polyprenyl quinols
LC.03.1062	DG(37:6)	2	Organic compounds	Lipids and lipid-like molecules	Glycerolipids	Diradylglycerols	1,2-diacylglycerols
LC.03.1063	N-caproyl-1-palmitoyl-2-linoleoyl-sn-glycero-3-phosphoethanolamine(1-)	2	Organic compounds	Lipids and lipid-like molecules	Glycerophospholipids	Glycerophosphoethanolamines	N-acyl-phosphatidylethanolamines
LC.03.1064	1-O-oleoyl-N-acetylsphingosine	2	Organic compounds	Lipids and lipid-like molecules	Fatty Acyls	Fatty acid esters	Fatty acid esters
LC.03.1067	PS(O-20:0/17:2(9Z,12Z))	2	NA	NA	NA	NA	NA
LC.03.1068	zeta-Carotene epoxide	2	NA	NA	NA	NA	NA
LC.03.1069	C13H44N24O31S12	3	NA	NA	NA	NA	NA
LC.03.1070	Cer(d18:0/18:0)	2	Organic compounds	Lipids and lipid-like molecules	Sphingolipids	Ceramides	Long-chain ceramides
LC.03.1072	UNPD22549__4	2	Organic compounds	Organoheterocyclic compounds	Pyrrolines	NA	Pyrrolines
LC.03.1073	7alpha-Methoxy-8-labdene-3beta,15-diol__5	2	NA	NA	NA	NA	NA
LC.03.1074	UNPD95388	2	NA	NA	NA	NA	NA
LC.03.1075	Cohibin C	2	NA	NA	NA	NA	NA
LC.03.1077	C62H109N11O11	3	NA	NA	NA	NA	NA
LC.03.1078	Parasiloxanthin	2	NA	NA	NA	NA	NA
LC.03.1080	C12H41N23O28P4S7	3	NA	NA	NA	NA	NA
LC.03.1081	Montecristin	2	NA	NA	NA	NA	NA
LC.03.1082	C13H43N19O31P2S8	3	NA	NA	NA	NA	NA
LC.03.1083	C41H74O3	3	NA	NA	NA	NA	NA
LC.03.1084	Salinomycin;Antibiotic 61477;Coxistac	2	NA	NA	NA	NA	NA
LC.03.1088	PE(34:1)	2	Organic compounds	Lipids and lipid-like molecules	Glycerophospholipids	Glycerophosphoethanolamines	Phosphatidylethanolamines
LC.03.1089	N-(2-hydroxyoctacosanoyl)-15-methylhexadecasphing-4-enine-1-phosphocholine__2	2	NA	NA	NA	NA	NA
LC.03.1091	C14H31N26O35P3S5	3	NA	NA	NA	NA	NA
LC.03.1095	1-alpha-D-glucuronosyl-N-[(2R)-2-hydroxytridecanoyl]sphinganine	2	Organic compounds	Lipids and lipid-like molecules	Sphingolipids	Glycosphingolipids	Glycosphingolipids
LC.03.1096	C39H75NO6	3	NA	NA	NA	NA	NA
LC.03.1097	C11H28N18O25P2S10	3	NA	NA	NA	NA	NA
LC.03.1098	PE(40:0)	2	Organic compounds	Lipids and lipid-like molecules	Glycerophospholipids	Glycerophosphoethanolamines	1-(1Z-alkenyl),2-acylglycerophosphoethanolamines
LC.03.1099	PG(i-12:0/a-25:0)	2	Organic compounds	Lipids and lipid-like molecules	Glycerophospholipids	Glycerophosphoglycerols	Phosphatidylglycerols
LC.03.1100	Goyaglycoside h	2	NA	NA	NA	NA	NA
LC.03.1101	4-hydroxy-3-octaprenylbenzoate	2	Organic compounds	Lipids and lipid-like molecules	Prenol lipids	Tetraterpenoids	Tetraterpenoids
LC.03.1102	C12H46N21O30P5S3	3	NA	NA	NA	NA	NA
LC.03.1104	PC(36:5)	2	Organic compounds	Lipids and lipid-like molecules	Glycerophospholipids	Glycerophosphocholines	Phosphatidylcholines
LC.03.1105	Taurocholic acid	2	Organic compounds	Lipids and lipid-like molecules	Steroids and steroid derivatives	Bile acids, alcohols and derivatives	Taurinated bile acids and derivatives
LC.03.1107	Sphinganine	2	NA	NA	NA	NA	NA
LC.03.1108	C38H73O16P3	3	NA	NA	NA	NA	NA
LC.03.1109	Sarsasapogenin	2	Organic compounds	Lipids and lipid-like molecules	Prenol lipids	Triterpenoids	Triterpenoids
LC.03.1110	Daechuine S7;(-)-Daechuine S7	2	NA	NA	NA	NA	NA
LC.03.1111	Leukotriene B4	2	Organic compounds	Lipids and lipid-like molecules	Fatty Acyls	Eicosanoids	Leukotrienes
LC.03.1112	Ikarisoside F	2	NA	NA	NA	NA	NA
LC.03.1113	Betaenone F__1	2	NA	NA	NA	NA	NA
LC.03.1114	Cephalosporin P1	2	NA	NA	NA	NA	NA
LC.03.1115	Presqualene diphosphate	2	Organic compounds	Lipids and lipid-like molecules	Prenol lipids	Triterpenoids	Triterpenoids
LC.03.1117	Phenol sulphate	2	Organic compounds	Organic acids and derivatives	Organic sulfuric acids and derivatives	Arylsulfates	Phenylsulfates
LC.03.1118	3b-Allotetrahydrocortisol	2	Organic compounds	Lipids and lipid-like molecules	Steroids and steroid derivatives	Hydroxysteroids	21-hydroxysteroids
LC.03.1119	4-Methoxy-5-(3,7,11,15-tetramethyl-2,6,10,14-hexadecatetraenyl)-1,3-benzenediol	2	Organic compounds	Benzenoids	Benzene and substituted derivatives	Phenoxyacetic acid derivatives	Phenoxyacetic acid derivatives
LC.03.1120	MG(18:3)	2	Organic compounds	Lipids and lipid-like molecules	Fatty Acyls	Lineolic acids and derivatives	Lineolic acids and derivatives
LC.03.1121	Sphinganine	2	NA	NA	NA	NA	NA
LC.03.1122	PS(20:1(11Z)/0:0)	2	NA	NA	NA	NA	NA
LC.03.1123	C54H70N8O15	3	NA	NA	NA	NA	NA
LC.03.1124	Betaenone F__2	2	NA	NA	NA	NA	NA
LC.03.1125	beta-Ergocryptam	2	NA	NA	NA	NA	NA
LC.03.1126	8-iso-15-keto-PGE2	2	Organic compounds	Lipids and lipid-like molecules	Fatty Acyls	Eicosanoids	Prostaglandins and related compounds
LC.03.1127	UNPD168785__2	2	NA	NA	NA	NA	NA
LC.03.1128	N(2')-acetylgentamycin C1a	2	Organic compounds	Organic oxygen compounds	Organooxygen compounds	Carbohydrates and carbohydrate conjugates	Aminocyclitol glycosides
LC.03.1129	UNPD37573	2	NA	NA	NA	NA	NA
LC.03.1131	UNPD100806	2	NA	NA	NA	NA	NA
LC.03.1132	Erinacine P	2	NA	NA	NA	NA	NA
LC.03.1134	Taurocholic acid	2	Organic compounds	Lipids and lipid-like molecules	Steroids and steroid derivatives	Bile acids, alcohols and derivatives	Taurinated bile acids and derivatives
LC.03.1135	Alpha-Linolenoyl ethanolamide	2	Organic compounds	Organic nitrogen compounds	Organonitrogen compounds	Amines	N-acylethanolamines
LC.03.1136	11(R)-HETE	2	Organic compounds	Lipids and lipid-like molecules	Fatty Acyls	Eicosanoids	Hydroxyeicosatetraenoic acids
LC.03.1137	C27H69N9O2S	3	NA	NA	NA	NA	NA
LC.03.1138	2-(14,15-Epoxyeicosatrienoyl) Glycerol	2	NA	NA	NA	NA	NA
LC.03.1139	N-2-hydroxypalmitoylsphingosine__2	2	NA	NA	NA	NA	NA
LC.03.1140	N-(2R-Hydroxyhexadecanoyl)-2S-amino-9-methyl-4E,8E-octadecadiene-1,3R-diol	2	NA	NA	NA	NA	NA
LC.03.1141	5-(1-amino-2-hydroperoxyethyl)benzene-1,3-diol	2	NA	NA	NA	NA	NA
LC.03.1142	MG(16:0)	2	Organic compounds	Lipids and lipid-like molecules	Glycerolipids	Monoradylglycerols	1-monoacylglycerols
LC.03.1143	UNPD190499	2	NA	NA	NA	NA	NA
LC.03.1144	2-(14,15-Epoxyeicosatrienoyl) Glycerol	2	NA	NA	NA	NA	NA
LC.03.1145	4-(4-Hydroxyphenyl)-2-butanone	2	Organic compounds	Benzenoids	Phenols	1-hydroxy-2-unsubstituted benzenoids	1-hydroxy-2-unsubstituted benzenoids
LC.03.1146	Dihydrosterigmatocystin	2	NA	NA	NA	NA	NA
LC.03.1147	2,6E,10E-Trimethyl-2,6,10-dodecatriene	2	Organic compounds	Lipids and lipid-like molecules	Prenol lipids	Sesquiterpenoids	Sesquiterpenoids
LC.03.1149	N-tetradecanoyl-15-methylhexadecasphing-4-enine	2	NA	NA	NA	NA	NA
LC.03.1150	UNPD147234	2	NA	NA	NA	NA	NA
LC.03.1151	Glabcensin P;(-)-Glabcensin P	2	NA	NA	NA	NA	NA
LC.03.1152	Endoxifen O-glucuronide	2	NA	NA	NA	NA	NA
LC.03.1154	UNPD144621	2	NA	NA	NA	NA	NA
LC.03.1155	LPE(20:1)	2	Organic compounds	Lipids and lipid-like molecules	Glycerophospholipids	Glycerophosphoethanolamines	2-acyl-sn-glycero-3-phosphoethanolamines
LC.03.1156	LPE(20:2)	2	Organic compounds	Lipids and lipid-like molecules	Glycerophospholipids	Glycerophosphoethanolamines	2-acyl-sn-glycero-3-phosphoethanolamines
LC.03.1157	Methyl cinnamate	2	Organic compounds	Phenylpropanoids and polyketides	Cinnamic acids and derivatives	Cinnamic acid esters	Cinnamic acid esters
LC.03.1158	6alpha-Malonyloxymanoyl oxide;(+)-6alpha-Malonyloxymanoyl oxide__3	2	NA	NA	NA	NA	NA
LC.03.1159	3-Dehydrosphinganine	2	Organic compounds	Organic oxygen compounds	Organooxygen compounds	Carbonyl compounds	Beta-hydroxy ketones
LC.03.1160	laureth-5	2	Organic compounds	Organic oxygen compounds	Organooxygen compounds	Ethers	Polyethylene glycols
LC.03.1161	Digitoxigenin	2	NA	NA	NA	NA	NA
LC.03.1162	8beta,15-Dihydroxy-ent-labda-13E-ene-8-O-beta-xylopyranoside	2	NA	NA	NA	NA	NA
LC.03.1163	N-(2-hydroxyicosanoyl)-15-methylhexadecasphing-4-enine	2	NA	NA	NA	NA	NA
LC.03.1164	C25H53N	3	NA	NA	NA	NA	NA
LC.03.1165	(R)-2-Hydroxysterculic acid	2	NA	NA	NA	NA	NA
LC.03.1166	Chabrolonaphthoquinone B;(-)-Chabrolonaphthoquinone B	2	NA	NA	NA	NA	NA
LC.03.1167	Neopellitorine B	2	Organic compounds	Organoheterocyclic compounds	Piperidines	N-acylpiperidines	N-acylpiperidines
LC.03.1168	Gibberellin A9	2	NA	NA	NA	NA	NA
LC.03.1171	mifamurtide__4	2	NA	NA	NA	NA	NA
LC.03.1173	beta-D-glucosyl-(1->4)-N-acetyl-D-glucosaminyl undecaprenyl diphosphate	2	Organic compounds	Lipids and lipid-like molecules	Prenol lipids	Polyprenols	Polyprenyl phospho carbohydrates
LC.03.1174	UNPD16054	2	NA	NA	NA	NA	NA
LC.03.1175	UNPD148116	2	NA	NA	NA	NA	NA
LC.03.1176	Adenine	2	Organic compounds	Organoheterocyclic compounds	Imidazopyrimidines	Purines and purine derivatives	6-aminopurines
LC.03.1177	C12H28N23O21P5S10	3	NA	NA	NA	NA	NA
LC.03.1178	Antibiotic TAN 547A;Chitinovorin A	2	NA	NA	NA	NA	NA
LC.03.1179	(4R,5S,7R,11x)-11,12-Dihydroxy-1(10)-spirovetiven-2-one 12-glucoside	2	NA	NA	NA	NA	NA
LC.03.1180	3-(4-hydroxy-3,5-dimethoxyphenyl)-1-(2,4,6-trihydroxy-3-methoxyphenyl)propane-1,2-dione	2	Organic compounds	Phenylpropanoids and polyketides	Linear 1,3-diarylpropanoids	Chalcones and dihydrochalcones	2'-Hydroxy-dihydrochalcones
LC.03.1181	C42H67NO18	3	NA	NA	NA	NA	NA
LC.03.1182	Kynurenic acid	2	Organic compounds	Organoheterocyclic compounds	Quinolines and derivatives	Quinoline carboxylic acids	Quinoline carboxylic acids
LC.03.1184	Moracin L	2	Organic compounds	Phenylpropanoids and polyketides	2-arylbenzofuran flavonoids	NA	2-arylbenzofuran flavonoids
LC.03.1185	2-amino-4-({1-[(carboxymethyl)-C-hydroxycarbonimidoyl]-2-{[10-hydroxy-3-(2-hydroxy-4-methoxyphenyl)-8,8-dimethyl-2-oxo-2H,8H,9H,10H-pyrano[2,3-h]chromen-9-yl]sulfanyl}ethyl}-C-hydroxycarbonimidoyl)butanoic acid	2	NA	NA	NA	NA	NA
LC.03.1186	Gypsogenic acid	2	NA	NA	NA	NA	NA
LC.03.1187	2,3-Dehydrokievitol	2	Organic compounds	Phenylpropanoids and polyketides	Isoflavonoids	Isoflav-2-enes	Isoflavones
LC.03.1188	Apiin	2	NA	NA	NA	NA	NA
LC.03.1189	Lucidenic acid A	2	NA	NA	NA	NA	NA
LC.03.1190	C11H21N21O25P4S9	3	NA	NA	NA	NA	NA
LC.03.1191	N-hydroxy tryptamine	2	Organic compounds	Organoheterocyclic compounds	Indoles and derivatives	Indoles	3-alkylindoles
LC.03.1192	UNPD129761	2	NA	NA	NA	NA	NA
LC.03.1193	C14H46N26O33P6	3	NA	NA	NA	NA	NA
LC.03.1194	Senecionine; LC-ESI-QTOF; MS2; [M+H]+; CE	2	Organic compounds	Phenylpropanoids and polyketides	Macrolides and analogues	NA	Macrolides and analogues
LC.03.1195	C47H72O18S	3	NA	NA	NA	NA	NA
LC.03.1196	Botryolide D;(-)-Botryolide D	2	NA	NA	NA	NA	NA
LC.03.1197	UNPD99236	2	NA	NA	NA	NA	NA
LC.03.1198	Isowertin 2''-rhamnoside	2	NA	NA	NA	NA	NA
LC.03.1200	LPC(18:2)	2	Organic compounds	Lipids and lipid-like molecules	Glycerophospholipids	Glycerophosphocholines	1-acyl-sn-glycero-3-phosphocholines
LC.03.1201	Herniarin	2	Organic compounds	Phenylpropanoids and polyketides	Coumarins and derivatives	Hydroxycoumarins	7-hydroxycoumarins
LC.03.1202	Arjunolic acid	2	NA	NA	NA	NA	NA
LC.03.1203	PC(18:1(9E)/2:0)	2	Organic compounds	Lipids and lipid-like molecules	Glycerophospholipids	Glycerophosphocholines	Phosphatidylcholines
LC.03.1204	avenanthramide A	2	Organic compounds	Phenylpropanoids and polyketides	Cinnamic acids and derivatives	Hydroxycinnamic acids and derivatives	Avenanthramides
LC.03.1205	Saundersioside D;(-)-Saundersioside D	2	NA	NA	NA	NA	NA
LC.03.1206	putative analog of trichodinA M+H	2	Organic compounds	Organoheterocyclic compounds	Benzopyrans	1-benzopyrans	Chromenopyridines
LC.03.1207	2-[[2-(3-nitrophenyl)-2-oxoethyl]thio]-3-pyridinecarboxylic acid	2	Organic compounds	Organic oxygen compounds	Organooxygen compounds	Carbonyl compounds	Alkyl-phenylketones
LC.03.1208	Pitheduloside K	2	NA	NA	NA	NA	NA
LC.03.1209	Safrole	2	Organic compounds	Organoheterocyclic compounds	Benzodioxoles	NA	Benzodioxoles
LC.03.1210	PS(20:0/0:0)	2	NA	NA	NA	NA	NA
LC.03.1211	Methyl cinnamate	2	Organic compounds	Phenylpropanoids and polyketides	Cinnamic acids and derivatives	Cinnamic acid esters	Cinnamic acid esters
LC.03.1212	Fissiceine	2	Organic compounds	Alkaloids and derivatives	Aporphines	NA	Aporphines
LC.03.1213	polygalacin D2	2	NA	NA	NA	NA	NA
LC.03.1214	Namonin E;(-)-Namonin E	2	NA	NA	NA	NA	NA
LC.03.1215	2-[(2,4,6-trimethylphenyl)sulfonylamino]acetic acid	2	Organic compounds	Benzenoids	Benzene and substituted derivatives	Benzenesulfonamides	Benzenesulfonamides
LC.03.1216	23-O-beta-D-Glucopyranosyl-20-isoveratramine	2	NA	NA	NA	NA	NA
LC.03.1217	PS(20:1(11Z)/0:0)	2	NA	NA	NA	NA	NA
LC.03.1218	Gluconapin	2	NA	NA	NA	NA	NA
LC.03.1219	Patuletin 3,7-bis(3-acetylrhamnoside)	2	NA	NA	NA	NA	NA
LC.03.1221	C57H86O21S2	3	NA	NA	NA	NA	NA
LC.03.1222	3-O-vanillyceanothic acid	2	NA	NA	NA	NA	NA
LC.03.1223	Cardivin D;(-)-Cardivin D	2	NA	NA	NA	NA	NA
LC.03.1224	13S-HpOTrE	2	NA	NA	NA	NA	NA
LC.03.1225	Sinuflexibilin;(-)-Sinuflexibilin	2	NA	NA	NA	NA	NA
LC.03.1226	Candicanoside A;(-)-Candicanoside A	2	NA	NA	NA	NA	NA
LC.03.1227	dioctylamine	2	Organic compounds	Organic nitrogen compounds	Organonitrogen compounds	Amines	Dialkylamines
LC.03.1228	1,2,4-Tris(methylene)cyclohexane	2	Organic compounds	Hydrocarbons	Unsaturated hydrocarbons	Branched unsaturated hydrocarbons	Branched unsaturated hydrocarbons
LC.03.1229	Phosphinopyruvate;PPA	2	Organic compounds	Organic acids and derivatives	Keto acids and derivatives	Short-chain keto acids and derivatives	Short-chain keto acids and derivatives
LC.03.1231	C16 Sphinganine	2	NA	NA	NA	NA	NA
LC.03.1232	C3H3N2O6PS	3	NA	NA	NA	NA	NA
LC.03.1233	C10H17N8O25PS10	3	NA	NA	NA	NA	NA

## Sheet: BLUPs
GID	GC.03.0001	GC.03.0002	GC.03.0003	GC.03.0004	GC.03.0005	GC.03.0006	GC.03.0007	GC.03.0008	GC.03.0009	GC.03.0010	GC.03.0011	GC.03.0012	GC.03.0013	GC.03.0014	GC.03.0015	GC.03.0016	GC.03.0017	GC.03.0018	GC.03.0019	GC.03.0020	GC.03.0021	GC.03.0022	GC.03.0023	GC.03.0024	GC.03.0025	GC.03.0026	GC.03.0027	GC.03.0029	GC.03.0030	GC.03.0031	GC.03.0032	GC.03.0033	GC.03.0034	GC.03.0035	GC.03.0036	GC.03.0037	GC.03.0038	GC.03.0039	GC.03.0040	GC.03.0041	GC.03.0042	GC.03.0043	GC.03.0044	GC.03.0046	GC.03.0047	GC.03.0048	GC.03.0050	GC.03.0051	GC.03.0052
210	0.191657	0.0140987	0.205871	1.18002	-0.40052	-0.207746	-0.000258918	-0.588313	-0.439935	-0.496995	0.194073	-3.83424	-0.957042	-0.304408	-1.20028	0.823575	0.795135	0.04866	0.218273	-0.825054	0.267385	-0.76212	-0.264519	-0.143098	-0.0524484	0.702716	-0.520182	-0.423926	0.0731189	0.882191	1.23667	-1.38412	-1.10271	-0.254635	-0.881295	-0.846217	0.211401	-0.796312	-0.532955	-0.590726	-0.221348	-0.295717	-0.125261	-1.81212	-0.752609	-0.680962	0.227627	0.345428	-0.403591
167	-0.982033	-0.00191018	-0.878817	-1.89669	-0.210255	-0.591237	-0.655268	0.032868	-0.380176	-1.76783	-1.01974	2.1171	-2.90675	-0.475311	0.51307	-0.86713	-0.523195	0.0563379	1.95923	-1.01445	0.195467	-0.368704	0.548143	-0.578577	0.0065931	0.179748	-0.676963	0.744334	-0.534579	-1.55884	-0.0390985	0.0588909	0.759362	-0.474801	0.521623	-1.08352	-0.274482	-0.867615	-2.0417	0.602262	0.780116	-1.01787	-0.870862	-1.50649	1.01774	-0.264407	-0.55872	0.390376	-0.193556
166	0.766587	0.0324262	0.726881	-0.309467	0.674029	0.212187	0.529974	-0.154178	0.545056	-0.800255	1.47328	-2.24352	-1.21933	-1.05145	-0.76578	-0.0706568	0.0955769	-0.0645175	1.82348	-0.616359	0.00521178	-1.25638	-0.127447	1.23002	-0.0277914	-0.151636	0.299609	0.24445	0.51005	-0.308595	0.289503	0.784354	-1.70056	-0.852804	-0.113121	-1.11966	0.489748	-0.250969	-2.32714	-0.0786109	0.199836	-0.218223	-1.68004	-2.3121	-0.644388	0.55764	-1.49543	-0.306346	-1.05678
213	-0.566845	-0.170178	-0.526886	-0.231699	-0.650445	-0.576424	-0.650342	-0.619701	-0.596507	-0.384364	-0.203595	-0.709415	0.736678	0.346867	-1.20253	-1.16381	-0.695856	0.0298702	-0.53083	0.0112559	-0.0971358	-1.15683	-1.52407	0.58034	-0.277769	-0.138315	-0.346426	-1.10607	-0.499998	-0.420876	0.191398	-0.897756	-0.947129	0.467276	-0.756453	-1.3718	-0.475644	-0.883091	0.383799	-1.02699	-0.799444	-0.731895	0.638823	-1.74962	-0.140472	-0.48134	-0.699322	-0.691224	-0.533638
212	0.133407	0.0470797	0.162625	-0.558672	-0.633043	-0.266576	-0.178809	-0.734944	-0.580388	-0.0906649	0.398441	-0.450867	-0.748058	0.0129252	-0.449844	-0.121427	-0.127485	0.0179291	-1.17156	-0.331475	0.15363	0.833425	-1.32176	1.24305	-0.0375084	-0.44077	0.537232	-1.28455	-0.0979301	-0.563523	0.495507	0.771816	-1.73402	-0.0663664	1.14824	-0.68506	0.0181722	-0.103277	-0.426189	-0.0670511	-0.552943	-0.850675	-0.0821438	-1.8108	0.225344	-0.415599	-0.547283	0.596683	0.373623
172	2.0664	0.180414	1.9497	-1.78054	-0.315283	0.172942	0.180393	-0.0238992	-0.348362	-0.194617	1.05407	-0.833517	-0.35669	-0.572877	0.501087	-0.43178	-0.0437412	-0.118038	0.064929	-0.586864	-0.0327361	0.212593	1.00082	-0.0550066	0.190084	0.524747	1.32059	0.805722	0.152393	-0.671438	0.079399	0.827142	2.2057	0.213432	-0.303605	0.643079	1.2164	0.356239	-0.122962	0.37234	1.03801	0.254611	-0.523326	1.77897	-0.126996	0.00821534	0.615008	0.0843833	0.252157
173	3.61328	0.166179	3.73139	-0.721731	0.181795	0.670907	0.82003	-0.327132	0.252554	0.908557	4.36937	2.76472	1.04706	0.342484	1.55348	0.587869	0.447246	-0.0784483	0.591042	0.266075	0.0163055	2.04912	1.77367	2.6312	0.204132	0.262622	0.71907	1.60912	0.618287	0.205143	-0.0598602	2.40613	3.52449	1.00683	1.17954	0.944931	2.28565	1.18617	-0.818996	1.4565	0.897263	-0.0824052	-0.0522029	0.117143	1.26345	3.22145	1.42875	0.574198	1.37094
174	0.147669	-0.323149	0.0538413	-0.845368	0.0184312	0.470643	0.310081	0.146545	-0.0106435	-0.12943	-0.297398	-1.05269	0.47538	-0.38901	0.245777	-0.530156	0.241126	0.351091	1.77897	-0.106224	0.0915039	0.566246	1.78218	-1.30774	-0.401949	0.515995	0.277509	1.4983	0.274918	0.0943012	-0.414678	0.940338	2.11293	-0.117202	0.122933	1.616	-0.291182	1.02512	2.00928	1.00589	0.324762	0.143406	-1.46771	1.79639	-0.25786	-0.277626	-1.19198	-0.10523	0.0733706
226	-3.16757	-0.401041	-3.16737	-1.78456	0.406986	1.1197	0.601191	0.261507	0.512232	0.657069	-1.84839	-4.89254	0.137524	2.68575	0.157354	-0.0702658	-0.19126	-0.273523	-1.60581	1.22644	-0.289937	0.797346	0.74959	-0.566808	-0.452482	-0.233577	0.656373	0.670025	0.472103	-0.911502	0.399124	-1.47526	3.80714	-0.386076	0.191194	2.75054	-1.94271	1.68807	2.9632	0.430658	-0.149615	0.961964	-2.02949	2.89318	-1.01403	0.0464417	0.243566	0.42974	0.5254
176	1.49934	0.0763636	1.2141	-2.66744	0.262907	-0.0533098	-0.19352	0.062669	0.299237	-0.622952	3.11711	3.96448	-1.92994	0.389949	-1.00007	-1.13219	-0.542875	-0.011932	-0.0962397	-0.659031	0.00751617	-0.42785	0.692029	2.57911	0.0832623	0.237372	0.61902	0.647181	-0.217204	-0.806175	0.399572	0.221706	-0.781592	-0.717706	0.632167	0.171353	1.00559	0.208915	1.49831	0.663241	0.352425	-0.782741	1.76252	-0.577583	1.67761	0.42507	-0.0976969	0.443764	-0.786724
177	3.01616	0.653061	2.91411	-1.89882	-0.0959403	-0.0219401	0.0629903	-0.25247	-0.131731	0.519116	2.07338	1.16765	0.621087	0.405076	0.275401	-0.579083	1.00198	-0.0127862	2.05809	-1.03102	0.173363	0.134455	1.20543	3.59349	0.918096	0.848211	0.783327	1.89877	0.00104191	0.0562575	0.550757	1.82104	1.01131	1.15978	-0.431382	-0.846937	2.08623	-0.369316	-2.39575	0.459594	0.650755	-0.661732	1.91514	-0.339475	0.301042	-0.11518	0.368718	0.389068	0.537528
214	-1.58085	-0.191262	-1.53999	1.12415	-0.453812	-0.183542	-0.67458	-0.288431	-0.522438	0.503821	-0.670705	2.43628	3.97198	-0.386847	-0.773916	-0.71244	-1.77496	0.104717	-0.982932	0.645132	0.322733	0.478513	-1.07243	-0.841897	-0.313463	-0.0848909	0.715022	-0.57223	-0.481278	0.0173069	-0.368487	-1.27225	-0.460385	1.12617	1.43859	0.671012	-0.481587	0.184205	4.45742	0.325914	-0.609066	0.20589	2.89021	1.82819	0.370906	-0.360915	0.708373	-0.771328	0.00436168
216	-1.41633	-0.602625	-1.30106	0.370068	-0.0933811	0.291772	0.0024682	0.0165504	-0.0467549	-0.737354	0.856399	-0.0683811	1.01898	0.84797	-0.308052	-0.508776	-0.369675	0.028952	-0.70654	0.783974	-0.196833	0.354822	0.315803	-0.423735	-0.716042	-1.16489	0.892432	0.194127	0.025821	0.00499594	-1.54154	0.272268	-0.234346	0.866476	1.26776	1.00901	-0.988352	0.688543	1.70182	0.67663	-0.403166	0.630855	-0.322701	3.42677	0.0448243	-0.0780572	-1.4712	-0.359812	0.0715506
229	-1.51055	-0.499242	-1.43819	-1.23406	0.733292	0.553829	0.637329	0.963994	0.866654	-0.497431	-0.458316	2.3797	-0.98107	1.77114	-0.971399	0.475033	-1.04501	-0.214611	-0.837958	0.0702633	-0.212877	-0.505034	-0.731219	-0.639719	-0.776515	-0.376676	0.793483	-0.894976	0.505254	-0.44051	-1.39413	-1.31521	-1.46992	0.471426	-0.492455	0.929831	-0.622038	0.71022	4.74409	-0.635372	-0.6705	1.24909	-0.380361	1.38293	0.741864	1.02561	-0.483305	-0.807557	-0.486646
209	-0.41741	-0.288055	-0.375611	0.0974219	-0.509326	-0.180359	-0.28701	-0.661179	-0.506354	0.33657	-0.403227	-0.650572	0.0411597	0.926995	-0.916053	0.0718574	-0.158649	0.0345335	-1.59339	-0.773445	0.00791426	-0.78561	-0.0933253	0.779828	-0.38683	0.164337	0.238308	-0.259433	-0.28681	-0.105073	0.289931	-0.192037	-0.631659	-1.30192	-0.108127	-0.230302	-0.261377	-0.011253	-2.08434	-0.211078	-0.683235	-0.572436	0.729218	-1.06054	0.453858	-0.564079	0.992124	-0.308732	-0.941802
193	-1.38708	-0.0834422	-1.32935	1.54111	-0.800145	0.0123613	-0.914996	-0.282815	-0.871861	-0.308392	-0.250896	1.90171	0.566582	-0.484331	0.358104	0.202272	-1.40836	0.00204108	-0.843048	-0.0981844	0.0767873	0.259921	-1.10988	-0.78363	-0.238791	-0.556498	0.171852	-0.572414	-0.896045	0.557447	0.517864	-1.65434	-0.908002	0.880385	0.588201	1.53748	-0.437369	0.30562	3.27276	-0.00769376	0.108796	-0.343889	2.09954	2.24171	0.691037	-0.865429	-1.39334	-0.984978	3.53615
194	-1.37379	0.119494	-1.21007	2.44015	0.561913	0.275969	0.627213	0.555947	0.63464	-0.848563	-1.03496	-3.65541	-1.33391	-1.14965	-1.05946	1.18455	0.280858	-0.0140513	-0.58133	-0.462977	-0.0984493	-0.0561628	-0.328032	-0.187158	0.126088	0.228726	-1.03626	-0.319032	0.512523	0.9062	1.00031	-0.239213	-1.08239	-0.648978	-0.0471758	0.103701	-0.838522	0.602688	1.24809	-0.144112	-0.546192	0.275517	-3.24545	-0.125868	-0.917397	0.345509	0.0906204	-0.168989	-0.314755
351	1.31174	0.215584	1.20208	0.951645	-0.463689	-0.246795	-0.613378	-0.810494	-0.382651	0.104193	0.905171	-0.264844	-0.520725	0.889425	0.0139768	0.120601	-0.406754	0.059913	0.0973248	0.110183	-0.388296	-0.511074	-0.117273	1.83974	0.10056	-0.0347763	1.16529	0.114787	-0.59539	0.370992	0.640647	2.16259	1.41916	-0.21496	0.529125	0.0248508	0.738544	-0.535245	1.28819	0.174126	0.7439	-0.555734	0.975325	0.389297	-0.498026	-0.401249	0.548734	0.589767	-0.373181
182	-0.458583	0.155867	-0.432626	1.2124	-0.0871434	-0.188451	-0.250977	0.193387	0.0547425	-0.228232	-0.630855	2.34995	-1.93916	-0.920159	-0.376573	0.378607	-0.469815	0.143822	-1.04089	0.664559	0.168445	-0.100484	-2.16114	-0.66842	0.0862329	-0.146261	1.00059	-1.83908	-0.159214	0.695918	0.363511	-0.156882	-2.77669	-1.38326	1.20146	-0.386273	-0.155989	-0.169222	2.11512	-0.22417	-0.273265	-0.309278	-1.46186	-0.0138323	0.0845848	-0.00632912	0.279609	0.5095	-0.068163
39	1.06087	0.107151	0.925545	-2.02882	0.0586636	-0.237515	-0.310358	-0.0594569	-0.0389611	0.175319	1.04334	0.17414	-0.709403	0.26618	-0.871368	0.205004	0.599528	0.00205714	-0.475216	-0.630601	0.0748524	-0.580151	0.787828	0.289765	0.167533	0.12458	0.298958	0.967567	-0.0964602	-0.951905	1.00662	-0.290356	-0.668157	-0.0569504	-0.564116	-0.248326	0.645079	-0.321351	1.81853	0.103199	0.59712	-0.479309	-0.225007	-1.04913	-0.120542	-0.270824	-1.68666	-0.0521106	-0.837451
37	0.00737354	0.006497	-0.0688259	-1.03999	-0.661771	-0.518296	-0.606512	-0.957501	-0.637819	-1.57234	0.748507	-0.519059	-2.00832	0.406522	-0.493526	-1.02548	-0.287732	-0.178155	-0.186278	-0.177495	-0.253754	-1.31212	0.822103	-0.106759	0.0430799	-0.231613	-0.924546	0.367846	-0.406161	-0.332828	-0.270109	0.617828	-1.22685	-0.791322	-0.834847	-0.827163	-0.141201	-0.689897	-0.768599	0.0550466	-0.701434	-1.14057	-1.00383	-1.35692	0.0330272	-0.40281	-1.35241	0.376563	-1.20159
38	0.400714	-0.0661077	0.324969	-0.482859	-0.0661323	-0.151963	0.0967307	-0.401959	-0.0702656	0.00729017	-1.7542	-0.43955	1.34296	1.19586	0.638034	-0.280183	0.0898366	-0.0457007	-0.368179	-1.20958	-0.117241	-0.127208	1.88539	-0.754502	-0.153967	-0.333887	-0.0213235	2.07658	0.0170662	-0.993878	-1.00087	-0.138852	1.3564	1.03892	-0.216409	-0.799931	0.0889325	-0.328469	-2.29004	1.0576	-0.142252	-0.695193	-1.18583	-2.66	0.185397	-0.0525147	1.28455	-0.00977479	0.199417
373	-0.395725	0.0519081	-0.477063	-0.345528	-0.972181	-0.523402	-0.804479	-0.72878	-0.988432	0.575526	-0.931004	0.224555	-0.157229	-1.33147	-1.04022	-0.33397	-0.223287	0.0333876	0.0465262	-0.00628505	-0.0119153	-0.293787	-1.73203	0.0175998	0.0664108	0.770167	-0.451904	-1.46608	-0.64058	-0.119853	-0.953486	-0.66601	-1.86818	-0.309895	-0.20266	-0.102787	-0.397157	-0.241898	1.91078	-0.944629	-1.23549	-0.716866	0.45798	-0.682205	-0.391342	-0.86316	-0.390105	-0.677976	-0.848594
611	-1.02183	-0.198848	-0.951433	-0.0937648	-0.481939	0.0336333	-0.550526	-1.13715	-0.481449	-0.519108	0.539496	0.0882304	-1.59264	-0.276531	0.425874	-0.412807	-0.663801	0.158057	-0.930378	0.506143	-0.0375999	0.330352	-1.08346	-1.37314	-0.270208	-0.702892	-0.774535	-1.06487	-0.313485	-0.353704	0.376872	-0.434007	0.441689	-1.20875	0.829878	1.0774	-0.500911	-0.0669803	0.636207	-0.143855	-0.722272	1.16839	-0.00383201	1.13148	0.187867	-0.329576	0.217624	-0.250567	0.493321
495	-0.684094	0.189209	-0.611754	0.748704	0.437507	0.396204	0.684579	0.871241	0.53714	1.50947	-0.66542	-2.09426	2.9535	-0.146932	-0.0947609	1.16344	0.325479	0.0523277	-0.289823	-0.543075	0.113693	0.0344477	-0.407454	2.72644	0.299412	0.402343	-0.243348	-0.125103	0.582422	-0.246819	-0.322567	0.0155026	-0.42908	2.0169	0.780764	0.461023	-0.212607	0.0732869	-0.131002	0.218812	0.118001	-0.172702	-0.836149	-0.145414	-0.105499	0.359936	2.37379	-0.287802	0.0565111
429	-1.54044	0.379279	-1.53784	0.854449	1.10614	0.794669	0.670013	0.920069	1.20854	1.50579	0.429238	2.68896	2.41375	-0.419848	0.99389	1.60374	-0.564816	0.165419	0.593537	1.21906	0.058662	0.454894	0.820322	-0.307538	0.578934	0.645641	0.500389	1.13585	0.326206	0.754044	0.491817	-1.07691	0.95146	2.06013	-0.204201	2.37968	-0.801586	1.0797	2.15647	0.303127	0.945341	0.563375	1.15134	4.28733	1.25328	1.03901	0.347499	0.647221	1.78785
417	-1.67272	0.0273013	-1.61694	1.54949	0.0340202	-0.52303	-0.510768	0.0789978	0.0174315	0.525406	-1.19232	-1.03086	0.172862	-0.279212	-0.367978	0.757199	-0.51663	0.0994387	-1.12354	1.16848	-0.00350071	-0.307111	-0.0881744	0.205446	-0.00925018	-0.609221	-0.0569139	-0.0791839	-0.363887	0.931307	-0.392392	-1.14853	0.0734193	-0.528088	-0.387727	-1.04682	-0.787743	-0.495631	-1.76994	-0.319359	0.0526855	-0.316802	0.00403098	-2.58862	0.382648	-0.185405	0.998371	0.137105	0.112489
413	-0.0486382	0.0216951	0.0225537	2.30058	0.537556	0.231491	0.533856	0.545203	0.52648	0.7106	0.713438	1.2562	0.471933	-1.24116	0.289036	0.935668	-0.394595	0.0177046	0.575067	0.904174	-0.0300115	0.386109	-1.10928	-0.690435	0.0534919	1.31091	-1.72135	-0.869759	0.378875	0.88002	-0.33053	-1.80942	-1.64246	0.408532	0.492173	-0.367932	-0.308455	0.334562	-0.443325	-0.337708	0.025127	0.472092	0.313939	-0.764405	0.70949	0.412423	0.110163	-0.432774	0.378988
528	0.107718	0.257569	0.0511075	0.0891786	0.277545	-0.0873274	-0.00104614	0.547766	0.213843	-0.626171	0.592785	0.480194	-1.60869	-0.997014	-0.00478825	-0.102644	-0.46175	0.307838	1.1177	-0.719518	0.0417618	0.960532	-1.3961	-0.36816	0.289371	1.25088	-0.992273	-0.913275	0.042394	-0.394346	0.812605	-0.951663	-1.92268	-1.18023	0.239004	-0.428564	-0.189495	-0.390716	-0.867701	-0.547802	-0.0547299	-0.334282	1.3156	-0.525878	-0.184045	0.182064	-1.11343	-0.710204	-0.114204
593	-1.63171	-0.169375	-1.71793	1.00859	-0.837125	-0.0182098	-0.51529	-0.552777	-0.776534	-0.100625	-0.226062	0.0544288	-0.0584947	-0.565942	0.442169	0.45628	-0.346639	0.103797	0.676847	-0.705912	0.260658	0.671365	0.124214	-1.12107	-0.229835	-0.546946	0.0883816	-0.0858628	-0.340679	-0.285063	-0.128289	0.00889142	-0.382317	0.502076	-0.377959	1.25702	-0.862844	0.324177	3.39597	-0.240443	0.255648	0.134607	1.02102	2.81338	-0.969136	-0.945627	-1.18921	0.125067	0.134939
607	2.09103	0.11561	2.03261	-1.71787	-0.521092	-0.262194	-0.830812	-0.0342586	-0.558224	-0.0222946	0.401807	1.9496	-3.26033	-1.61976	0.41868	-0.404037	0.188669	0.0275575	-0.682974	0.447122	0.16125	-0.359686	-0.664987	-1.43761	0.209707	0.915443	-0.462459	-0.196733	-0.637125	-1.04715	-1.27851	1.69546	-0.322292	-0.56996	0.0897385	0.88339	0.956785	-0.186435	0.790123	-0.452099	-0.205042	0.550907	2.98224	1.59825	0.652619	-0.564694	0.621273	-0.75407	0.127749
588	-2.17728	-0.0901214	-2.02968	-0.437349	-0.765144	-0.358535	-0.915609	-0.642512	-0.785509	0.835801	0.835671	0.623656	2.37538	-0.370611	-0.270104	-0.425733	-1.36791	-0.00378105	-2.81892	-0.16687	0.0706751	0.122145	-1.13901	-1.30697	-0.166647	-1.38246	-1.07815	-1.27747	-0.710743	-0.419965	-0.726092	-1.96747	-1.55533	1.36389	-0.45615	0.683722	-1.66225	-0.136538	0.80116	-0.829418	0.143306	-0.137437	-0.636617	0.551351	-0.243898	-0.613511	0.0587858	-0.0543201	-0.25806
467	-2.56553	-0.307114	-2.32486	0.257128	-0.190678	-0.120504	-0.373081	0.00395442	-0.143957	-1.18286	-1.91429	-0.232833	-1.45736	0.225145	0.86599	-0.515797	0.544217	-0.0336969	-1.07088	3.93286	-0.0450748	0.681046	-1.10775	-0.228863	-0.327653	-1.14362	-0.366644	-0.958385	-0.182347	-0.0678542	-1.43843	-1.55816	2.04255	-0.981943	-0.350407	0.703963	-1.25387	0.288126	2.22527	-0.708882	-0.343168	0.919986	0.46768	0.940613	-0.681946	-0.18233	-0.31681	-0.680637	0.964162
534	0.252759	0.298691	0.244231	-1.95996	0.0464715	-0.156729	-0.350466	-0.199384	0.0705967	0.0338198	2.24864	3.16432	-1.79339	1.29449	0.838837	-0.504842	-0.245204	0.146501	1.74127	-0.139613	0.242699	0.544444	1.69485	-0.480423	0.40085	1.50549	0.321406	1.60887	-0.253689	-0.661982	0.146275	-0.222802	2.03832	-1.12093	0.146223	0.192941	0.28574	0.0228794	0.734538	1.11816	0.699682	-0.653346	0.317728	-0.534006	0.832002	0.0984115	0.211539	0.550724	-0.316014
550	-1.39069	-0.111748	-1.35148	1.46541	-1.84775	-1.2224	-1.32949	-1.74169	-1.77328	0.454939	-0.971851	-4.6538	2.66111	-2.12899	-1.94866	-0.417969	-0.120318	-0.121657	-2.66982	-1.5897	-0.52117	-0.91453	-2.78463	-1.20654	-0.141648	-1.00481	-1.1692	-2.49659	-1.02489	-0.018006	0.836895	-0.600858	-3.89101	0.363091	-0.741825	-1.68723	-0.956953	-1.54415	-0.31551	-1.431	-1.14514	0.208101	-2.70251	-1.23969	-2.39133	-1.82498	-0.969341	-0.728926	-1.41718
438	-0.402234	0.358184	-0.261995	-0.323977	-0.138071	-0.343263	-0.396299	-0.399386	-0.154562	-0.0397843	0.249629	0.873762	-0.177081	-0.829951	-0.215604	-0.261168	0.693691	0.210217	-0.27794	0.867588	-0.0689656	0.720088	-1.47444	-0.00995782	0.413879	-0.281632	0.496345	-1.20809	-0.204827	-0.514638	-2.10888	-0.587323	-0.437044	-0.608875	1.79831	-1.11685	-0.475698	-0.601415	-1.29296	0.25202	-0.988739	-0.641539	0.6157	-2.38277	-0.292672	-0.094008	0.729854	-0.343975	0.15262
445	-1.07396	0.160791	-1.1299	-0.13794	-0.581074	-0.511552	-0.654001	-0.369363	-0.486076	-0.20435	-1.98511	1.26142	0.226336	-1.78803	-0.0847996	-0.282031	-0.9739	-0.182603	0.725272	0.127213	0.202339	-0.3527	0.0513637	-1.04679	0.291732	0.511943	-0.506026	0.0749582	-0.418419	-0.594529	-0.260505	-0.866527	-1.07684	1.01932	-0.274872	-1.12477	-0.554611	-0.879472	-2.56087	-0.200169	0.352641	0.539173	-1.19354	-1.3402	0.114617	-0.692476	0.0580504	0.647519	-0.307485
511	1.15882	-0.146304	1.1294	0.7016	0.714515	0.197084	0.750531	0.920036	0.742503	0.103226	0.902082	0.109739	-0.601099	0.390618	-0.354843	1.2276	0.25491	-0.00233471	-0.890189	1.39968	-0.215126	0.589862	0.509428	0.918754	-0.167017	0.11858	0.0254252	0.484657	0.479697	0.211769	0.673164	-0.209201	-0.402614	-0.473593	0.556733	-0.665916	0.374692	-0.083636	-1.39316	0.506358	-0.311465	0.193257	0.259903	0.482289	0.0601267	0.756871	-1.49801	0.0659755	0.760027
509	-1.30838	0.29421	-1.34812	2.09884	0.473688	0.0828373	0.227743	0.438046	0.490028	1.15914	-1.3893	0.0244861	2.21153	0.622638	-0.694284	1.62372	-0.112173	0.0489284	-1.23585	0.0725837	0.174674	-0.80928	0.25671	-0.40411	0.433508	0.573454	0.760305	0.278443	0.224873	1.65492	0.493872	-1.6486	-0.449567	0.629569	-0.338497	-0.137023	-0.546212	0.194836	0.993093	0.00196525	-0.250821	-0.417095	0.0682454	0.564633	0.247348	0.352105	0.661502	-0.110887	-0.140116
513	0.894861	-0.110753	0.929828	3.21649	-1.05034	-0.81728	-0.783201	-1.16119	-1.09186	0.107248	0.779046	-2.75008	1.75369	-0.0450374	-2.53485	1.0607	0.336743	-0.0398243	-2.12407	-1.60498	0.141001	-1.12536	-1.01251	-0.961778	-0.0909128	-0.956139	-0.797186	-0.949933	-0.519199	1.5366	-0.764222	-1.28793	-2.28966	0.746011	-0.249407	-2.13942	0.448683	-1.51303	-2.72347	-0.787826	-1.0812	-2.69705	0.421466	-3.34945	-0.944113	-1.15426	1.45659	-0.468636	-1.14241
471	-0.947203	0.134688	-0.997811	2.20266	-0.538066	-1.09805	-1.32118	-0.983442	-0.503371	0.40257	-1.27015	-0.29876	2.72179	-1.02017	-0.592633	-0.126968	-1.26412	-0.0976477	-0.576891	-0.401401	-0.237543	-1.26948	-0.611169	-0.890944	-0.0791865	-0.847435	-1.73007	-0.496444	-1.26038	0.360288	-0.391487	-0.455832	-0.201128	2.06386	0.354376	-2.23035	-0.0518399	-1.39741	-2.1416	-0.0812077	0.249258	-1.17759	0.439104	-3.41689	-1.10942	-0.535705	-0.080436	0.547381	-0.834263
478	1.56601	0.55553	1.50501	0.692719	0.513532	0.0900055	0.415287	-0.35694	0.582303	2.91262	-0.549076	-0.47613	6.14872	0.592095	1.03626	1.29079	0.981163	0.19436	0.694417	-0.650007	0.0621236	-0.141107	0.463444	2.89007	1.19286	0.191089	0.294307	0.39235	0.369265	0.411711	-0.518456	0.280916	0.383269	3.9655	0.570732	-0.428818	0.547929	-0.295792	-2.59365	0.440128	1.03272	-0.196481	-0.338624	-2.66835	0.427305	0.565797	1.04347	1.88435	0.575396
406	0.968241	-0.0583017	0.972457	2.65858	-0.556985	0.0457782	0.206338	-0.275728	-0.623954	-0.589892	0.435992	-3.96962	-0.864979	-1.05096	0.39289	0.769207	0.494327	-0.0997856	0.297062	-1.28761	-0.2573	0.268854	-0.130729	-0.881375	-0.0706457	0.380888	-0.143113	-0.295942	0.293493	1.41286	-0.699954	1.46077	-0.37138	-1.8239	-1.25345	-0.796127	0.70561	-0.373352	-0.822903	-0.703585	-0.902475	0.740314	-0.456769	-0.325018	-1.26377	1.39163	-1.06559	-0.218062	0.16482
421	-0.50722	-0.127399	-0.457256	0.834798	-0.578464	-0.442971	-0.680054	-0.28328	-0.520819	0.0793376	-0.268542	3.23623	1.35998	0.469503	-0.113854	-0.0864409	-0.45908	-0.122675	-0.146372	-1.12741	-0.145696	0.0142064	0.125043	-0.989264	-0.253933	-0.110469	0.119442	-0.212755	-0.582389	0.833222	0.0372156	0.941671	-0.137684	0.389267	-0.790515	-0.383538	-0.257529	-0.513207	-1.03125	-0.435256	0.00937684	-0.694093	2.38149	-0.460741	-0.108804	-0.390634	0.864768	-0.117405	0.00729719
482	-0.315705	0.126014	-0.236548	-1.99909	1.24678	0.282729	0.452796	1.55046	1.14568	-0.515319	0.1167	6.44977	-0.636429	-1.16189	0.392259	-0.759914	-1.18536	0.297687	1.03834	0.516176	0.286152	1.16255	-0.0786483	0.072854	0.118428	0.552728	-0.24444	0.0171707	0.274775	-0.00517116	-0.301831	0.647961	-1.55068	0.303188	0.346642	0.340314	-0.138838	0.360281	-0.0755483	0.00856998	-0.260565	-0.0374839	5.79314	0.0896361	3.05956	1.10709	-1.18155	-0.260814	0.423988
507	-0.502696	0.172035	-0.746642	0.491379	0.57032	0.194721	0.322004	0.52684	0.613638	1.39241	1.38372	0.831181	3.03463	-2.11721	0.942993	0.640842	-0.374001	-0.135631	0.583155	0.238898	-0.0618168	1.59902	-0.433252	0.733514	0.26369	0.406712	0.728658	-0.644179	0.207864	0.587293	0.568978	-1.09903	-0.838713	1.16803	-0.619999	0.598752	-0.247293	0.610412	0.878301	-0.650764	-0.308422	0.722938	0.672375	1.04899	1.27641	0.455659	0.120393	-0.378254	0.900566
553	-0.0252312	0.20674	-0.100842	2.84027	-0.776459	-0.92754	-0.991668	-1.1373	-0.787453	-0.751349	-1.00832	-0.801545	1.47689	-2.16149	-0.722887	-0.201291	-0.520618	0.0631572	-1.07218	-0.764764	-0.0685086	-0.712204	-2.47351	-0.10294	0.184074	-1.00953	-1.51491	-2.28158	-0.800701	1.56222	-0.820428	-0.562201	-2.41462	0.4493	-0.15978	-2.24654	-0.100277	-1.57258	-2.65039	-1.20616	-0.578002	-0.912742	0.803128	-3.83747	-0.289411	-0.647745	-0.891093	0.0665711	-0.457493
476	-0.500538	-0.0809771	-0.419257	0.410206	0.0808973	-0.276653	-0.0403851	-0.0465468	0.0950507	0.719811	0.0883808	-1.80256	2.74971	-0.21628	-0.62965	0.151187	0.10001	0.0105101	0.627162	-0.924714	-0.280671	-0.961452	0.0181553	-1.13983	-0.152681	0.525648	-0.328351	0.0752091	-0.0824847	-0.0300908	-0.872288	-1.76485	-0.958803	1.48594	-1.11885	-1.0113	-0.487794	-0.0483534	-1.33132	-0.460424	-0.914424	-0.180576	-1.34796	-1.68064	-0.535568	0.0740959	0.0994111	-0.790151	-0.0993895
575	-1.38946	-0.228116	-1.38818	2.13245	-0.955002	-1.05756	-1.26515	-0.987432	-0.96555	-0.559243	-0.45072	-0.585282	1.03341	0.470397	-1.16966	-0.0697642	-0.669083	-0.10974	-1.86039	-1.72072	-0.0389791	-1.64944	0.0915578	-1.50974	-0.343131	-0.323808	-0.379766	-0.0496848	-0.852265	1.47135	-2.21009	-2.1045	-1.734	0.958061	-0.307849	-2.09433	-1.01421	-1.63061	-2.44833	-0.0899917	-0.0310357	-1.91849	0.473773	-4.13824	-0.729843	-1.05353	-0.889498	0.203434	-1.28037
392	0.135709	0.385053	0.0731886	1.23107	0.268394	0.248125	0.268676	0.12076	0.178502	-0.620538	1.56991	0.746767	-1.80162	-1.08198	0.687562	0.646305	0.0046422	-0.0605096	1.11928	0.516126	0.0454209	0.322455	-0.270088	-1.26679	0.518203	0.188069	1.06854	-0.275004	0.215663	1.21886	0.752404	0.263379	-0.572706	-0.597311	0.827827	-0.150993	0.0516452	0.421083	-1.31513	0.1244	0.777229	0.600528	-1.05345	-0.313482	0.283929	0.156447	-0.362912	1.28511	0.611999
506	-0.357174	0.0695317	-0.374153	1.70922	-1.64184	-1.06363	-1.32046	-2.03483	-1.71127	-1.02968	-1.55653	-3.35641	-0.433365	0.74722	-0.767821	-0.069082	-0.231379	0.0337858	-1.67589	0.351036	0.0797734	-0.739114	-0.598369	-1.26279	-0.0552624	-0.862551	0.745967	-0.617589	-1.01229	0.534375	0.140622	-0.728366	-0.265586	-0.551904	0.0732105	-1.67614	-0.0347475	-1.12687	-2.35216	-0.144031	-0.174698	-0.677774	-2.5868	-1.82496	-1.79331	-1.45972	-0.923929	0.338532	-0.375988
364	1.40756	-0.469234	1.20179	-0.722426	0.378427	0.644199	0.675617	0.585104	0.272398	-0.0813119	-0.0061413	0.443504	-1.61475	0.608152	1.33395	0.457947	0.539528	-0.117	2.24543	-0.297537	-0.188953	0.514485	1.09198	-1.51831	-0.585822	0.958288	-1.41149	1.13257	0.470582	-0.105813	0.294494	0.514303	0.908698	-0.386976	0.143985	1.32087	0.825475	1.202	1.2081	0.595994	-0.102799	1.65451	-0.482737	1.87576	0.104521	0.200231	-1.39735	-0.540965	0.205513
133	1.48108	0.169367	1.54342	-0.364484	1.14901	0.408905	1.04879	1.19615	1.16408	0.514973	0.931278	0.621118	-1.25267	0.142988	0.499974	0.841812	1.23683	-0.141832	1.05688	1.29672	-0.131311	-0.384069	-0.236075	4.38943	0.225581	1.12263	1.47276	-0.176006	0.769153	0.252178	-0.0746174	2.13249	-1.40144	-0.448025	-0.215561	-0.229802	1.0427	0.423455	-0.784484	-0.24413	0.707147	0.191928	-0.617106	0.0504179	0.709811	0.969528	1.6292	0.87076	-0.228177
197	-0.844708	-0.317693	-0.898699	-0.500263	-0.949061	-0.398281	-0.847516	-0.988582	-0.876516	0.176332	0.538523	2.52926	-0.158754	-0.57607	-0.584762	-0.14206	-1.13661	0.146755	-0.732264	0.114611	0.0629178	-0.298854	-1.13144	-0.939887	-0.429421	-0.833756	-0.676167	-1.23252	-0.831226	-0.691323	0.216805	-0.778257	-1.33633	-0.850995	0.126306	0.605488	-0.817456	0.329519	0.477001	-0.580835	-0.488531	-0.350236	-0.818472	0.724365	0.537348	0.216762	-1.14779	0.0741221	-0.576163
294	-1.13427	-0.286958	-1.21325	0.813916	-0.827607	-0.422356	-0.767421	-0.211798	-0.846722	-1.21323	0.950366	0.893688	-1.79965	0.533789	0.394163	0.0869827	-0.93878	0.0678457	0.847822	0.582809	-0.0328033	0.101092	-0.649658	-0.196593	-0.420935	1.07822	-0.443243	-0.711487	-0.614327	0.271954	0.166552	-1.04473	1.1521	-1.1569	-0.394401	-0.00222026	-0.556291	-0.0532718	0.38537	-0.521125	-0.195436	0.582317	0.713661	1.45025	-0.41197	-0.757246	-0.333848	-0.654243	0.832328
378	-1.2956	0.0175736	-1.18464	1.05855	-0.0998284	-0.351933	-0.405466	-0.26456	-0.117635	-0.184369	-1.19107	-0.311359	1.49859	-2.1945	-0.55568	-0.227097	-0.112416	-0.0843563	-0.834452	0.316966	-0.0940763	0.303484	-1.55685	-1.20581	-0.0769728	-0.501749	-0.917766	-1.64568	-0.260231	0.66153	0.299897	-0.30809	-2.47603	-0.0992141	0.256469	-1.20228	-0.73627	-0.909903	-0.0451971	-0.773234	-0.40367	-0.738661	0.507089	-0.745661	-0.154642	0.0501805	-0.32464	-0.00103518	-0.0999866
291	-1.08857	0.304671	-1.01746	1.84962	-0.517112	-0.158185	-0.375719	-0.289244	-0.544415	0.56511	-0.221121	-1.4009	0.774651	-0.855509	0.411698	0.141135	-0.619229	-0.0185866	-1.17273	-0.0156156	0.0859697	1.34722	-0.54473	0.468154	0.397385	0.0519577	0.118197	-0.714715	-0.322236	1.22272	-0.192705	-1.52842	-1.0273	-0.219793	1.25113	0.371304	-0.878746	0.381001	0.8716	0.261591	0.683173	0.208381	-0.294148	0.490867	0.152291	-0.554328	0.314952	0.929729	0.563231
343	-0.256666	0.00112175	-0.0870604	0.433824	-0.915886	-0.348538	-0.727726	-0.441455	-0.999809	-0.255331	-1.30708	1.38533	1.50974	-0.94207	-0.409482	-0.924629	0.439473	0.048663	-1.28695	-0.983471	0.0158035	-1.04031	0.222907	0.821456	-0.0781316	-0.665732	0.380456	0.0971774	-0.509603	-0.209021	1.13735	-0.540719	-0.925642	0.614954	-0.129712	0.226246	-0.358686	-0.218228	-0.704601	-0.00376676	0.300973	-0.0629995	0.0746132	0.621043	-0.208982	-0.998172	0.15813	0.401749	-0.747199
302	-1.35518	-0.315283	-1.34677	-0.292456	-1.02393	-0.617909	-0.691405	-1.61573	-1.02279	-0.540316	-0.103495	-2.16983	-0.252754	-0.957226	-0.808882	-0.39094	0.708177	-0.0892869	-0.691188	-0.518733	0.332109	-0.92229	0.652677	-1.41053	-0.347162	-0.536366	-0.898205	0.44761	-0.332292	-1.12419	-1.19227	-1.79904	1.69902	0.0950662	-0.0285955	-0.236154	-1.50525	-0.424357	-0.0875911	0.192604	0.228227	0.38925	-6.19669	-0.899953	-1.68112	-1.0288	-0.489258	0.188656	-0.639565
303	-1.22239	-0.412855	-1.17135	-2.98018	1.22983	0.599919	0.521028	-0.331415	1.2144	-1.84385	-0.628459	1.31278	-2.12918	-0.585311	0.647773	-2.06014	-0.784874	-0.119426	1.44167	-0.0232742	-0.298234	0.329766	1.59587	-0.453152	-0.490458	-0.623533	-0.617522	1.09931	0.492605	-1.49884	-0.0364051	-0.171533	1.0943	-1.28445	0.306306	1.44388	-0.754078	0.292938	1.39028	1.12654	0.139367	1.85744	-0.747831	0.717952	1.05709	1.13271	-1.01354	0.0850334	0.4779
304	-2.83518	0.0645515	-2.70617	0.814507	0.870776	0.417012	0.357375	1.1752	0.774296	-0.147906	-0.729936	-0.3004	0.0164442	-1.18662	0.857501	0.979517	-0.150638	0.0506709	0.825866	0.575393	-0.084563	-0.197577	0.952844	-1.07946	0.0946116	-0.0810844	-0.561634	0.858203	0.214506	0.488289	-0.33031	-2.03437	0.388153	-0.645446	0.161365	1.20653	-1.33083	1.17688	1.76312	0.582384	1.09367	1.55335	-0.762737	1.08845	-0.180045	0.404643	-0.36919	0.373435	-0.212152
305	-2.03215	0.000616285	-1.96097	0.348516	-0.203295	-0.482325	-0.76798	0.0450741	-0.222433	-0.751115	0.433668	-0.600986	0.824583	-2.40286	0.0444207	-0.293058	-0.367082	-0.0602118	-1.09726	-0.667065	-0.0784978	-0.676317	-0.751386	-1.39064	0.062795	-1.12777	-1.06696	-0.828553	-0.567047	-0.584357	-0.656887	-1.13077	0.946521	0.255605	-0.192042	-1.22305	-1.14321	-0.576489	-2.47793	-0.437477	-0.378265	-1.08396	0.481849	-3.23623	-0.83959	-0.510329	-1.59455	-0.254221	-1.03606
306	1.06969	-0.162504	0.977894	-1.85313	-0.170654	0.398681	0.269205	-0.230363	-0.175849	-1.13476	1.71427	-1.68756	-1.5438	-0.567411	-0.208792	-0.162898	0.0524112	-0.110301	-0.0448237	0.216994	0.23158	-0.34839	-0.00727242	-0.152355	-0.245997	-0.826895	-0.214245	-0.380885	0.261645	-0.453804	0.53772	-0.0576059	0.459981	-0.33004	0.133516	1.11801	0.665335	0.511031	0.0974856	0.152405	0.904665	0.209664	0.315421	0.913198	0.0655186	-0.231852	-1.00051	-0.336106	-0.38358
367	1.86933	0.0714013	1.79651	1.08355	0.67641	0.526623	0.977788	0.790136	0.679892	0.698673	-0.00683822	-4.15493	0.763163	-1.50248	0.0780573	1.1629	1.10462	0.0583927	1.2675	0.292919	0.104271	0.704138	0.240957	-0.228173	0.332925	0.725792	-0.110289	-0.171019	0.832052	1.20269	0.0362582	3.72138	-0.204876	1.61111	0.00938018	0.199899	1.16077	0.492754	-1.66254	0.235772	0.403032	0.474562	-2.04749	1.179	0.356034	0.577072	0.997617	0.562109	-0.0272753
296	-2.22918	-0.437747	-2.11662	-0.0269543	-0.94409	-0.529766	-0.883445	-0.827886	-0.822145	0.571098	-0.455258	1.23446	2.46934	-0.407105	-0.0773606	0.407833	-0.0911751	-0.0836434	-1.4908	-0.765984	-0.0303773	-0.143583	0.82007	-1.21903	-0.513401	-2.01882	-1.9762	0.524688	-0.642708	-0.757395	-0.505677	-0.983437	0.797456	1.17481	-0.316009	0.183278	-1.43764	-0.423565	-0.122548	0.189487	-0.320929	-0.767824	-2.34174	0.282375	-0.630114	-0.890177	0.451265	-0.209186	0.220954
360	1.30002	0.526255	1.30039	0.928151	0.246734	0.00291223	0.253464	0.692611	0.297469	0.237673	-1.49809	-0.631704	0.815555	-0.169494	-0.865226	0.317474	0.619503	0.164732	-0.408753	0.44782	0.269404	-0.904192	-0.490671	4.47361	0.689546	0.257354	0.680627	-0.349691	0.0772087	-0.102891	-0.673967	0.428191	-1.08796	0.978485	-0.501794	-0.750238	0.81104	-0.277845	-1.52373	-0.501041	-0.0754967	-0.626604	0.765294	-2.00323	0.467442	0.397366	0.929087	-0.144764	-0.774474
976	1.86666	-0.263116	1.93384	0.469471	0.56956	0.598435	0.827438	0.45743	0.52869	-0.24028	0.766716	-1.86006	-0.906426	1.00486	1.23841	0.0816147	0.715657	0.0326874	-0.0122213	1.48578	0.0407895	1.29331	0.714582	-0.319513	-0.349185	0.841834	0.32476	0.688161	0.684176	0.531344	-1.56873	1.87697	1.8095	-0.226085	0.128629	0.985906	1.29845	0.894059	0.284952	0.463581	0.919751	1.12996	0.168478	3.09998	0.361481	0.316695	0.375381	0.394296	1.11479
183	2.5354	0.00382197	2.45331	0.749823	-0.0716421	-0.114769	0.140878	-0.120324	-0.063334	0.910375	1.10957	-0.262782	0.882462	0.273341	-0.942104	1.06982	0.722171	-0.0191546	-0.983118	0.19413	0.315397	-1.11442	-1.3821	3.34054	0.0450336	-0.0357079	0.871619	-1.32631	0.128983	1.12418	-0.690719	-0.438966	-1.57563	0.818101	-0.814071	-1.17975	1.19231	-0.385867	-1.4798	-1.16219	-0.473107	-0.750004	1.38589	-2.08165	-0.496855	0.085553	1.12281	-0.598564	-1.6975
190	-1.37029	-0.342979	-1.23978	1.6671	-0.376842	-0.451719	-0.367677	-0.084886	-0.319327	-0.0944337	-1.24031	-0.612011	1.94505	-0.179636	-0.989321	0.229565	-0.326202	-0.268531	-0.646095	-1.58534	-0.150531	-1.41225	-0.513049	0.771147	-0.43708	0.5889	-0.136727	-0.621236	-0.353431	0.652201	-1.26263	-1.56054	-0.779099	1.07189	-0.745031	-1.35282	-0.556031	-0.5849	1.97232	-0.617313	-0.638817	-1.06817	0.527656	-2.76222	-0.782036	-0.339264	0.926567	-0.734895	-0.873003
237	-0.272688	0.0320972	-0.149138	-0.891022	-0.0898022	0.158917	0.361466	0.195928	-0.00424292	-0.576358	0.103194	-4.48467	-1.22691	-0.841966	-0.93165	-0.4036	0.607768	-0.0496106	-1.60164	0.42052	0.0154581	-1.05761	-0.994129	-0.463074	0.0846048	-0.302239	0.737266	-0.840914	0.389033	0.11361	0.512788	-0.520239	-1.80728	-1.36414	-0.795021	-0.471053	-0.552378	-0.0646222	-0.331428	-0.946816	-0.115457	1.00565	-3.42761	-0.341194	-1.33341	-0.17398	-1.18139	-0.0514091	-0.553009
240	0.428744	0.0407448	0.454349	-0.303138	0.0497001	-0.0157988	0.0302413	-0.14082	0.060095	0.482936	1.08796	0.769304	0.610925	1.13861	-0.0657497	-0.221136	0.382924	0.115234	-0.37265	0.33368	-0.0208221	-0.345124	0.66358	-1.15309	-0.0761319	-0.228646	0.665206	0.704915	-0.00715937	-0.394609	0.624499	-0.342612	0.840232	0.0053106	-0.0924982	-0.624371	0.178375	-0.147615	0.402413	0.327071	0.482118	-0.309922	-2.04757	-0.126652	0.234247	0.0990112	0.499539	-0.262772	0.0346072
244	1.62765	0.239559	1.58389	-1.01157	0.293708	0.330072	0.549966	-0.0196562	0.20614	-0.218664	-0.00869457	-3.56378	-1.04169	0.83636	0.653005	-0.456505	1.33288	0.134931	2.25764	1.37953	0.371961	-0.201796	1.05957	1.32481	0.224384	1.19914	0.270991	1.22612	0.542769	-0.209415	-0.325624	-0.0299052	1.59944	-0.561478	0.201713	0.221831	1.0607	0.400989	-0.670462	0.542144	0.360841	0.141644	0.2802	0.0297024	-0.862452	0.0248217	-0.693233	0.159589	-0.108667
246	-1.07184	-0.0763328	-1.13289	-0.271166	0.0160336	-0.279802	-0.48519	0.0604739	0.100037	-0.721669	-0.442026	2.73731	-1.01152	1.63739	-0.307742	-0.843544	-0.880955	-0.167603	-0.932817	-1.38346	-0.143952	-0.684958	0.318873	-0.589566	0.134373	-0.753142	-0.394857	0.131562	-0.382041	-0.566749	0.895971	0.050696	0.290143	-0.965282	-0.0579984	-0.0734313	-0.519405	-0.320742	-1.86537	0.206129	-0.165961	-0.844134	4.48379	-0.458477	1.12355	0.0751405	-1.07816	0.0192467	-0.500944
374	-0.258624	-0.279141	0.0501223	-1.1094	-0.165845	-0.0828374	-0.262326	0.0735069	-0.138581	-0.668821	0.186794	0.48491	0.297678	-0.269199	-0.526348	-1.04223	0.213614	-0.132564	0.126094	-1.07321	-0.260973	-0.421516	0.209671	-1.42985	-0.293438	-0.752009	0.738977	-0.713302	-0.10966	-0.850794	0.817829	0.230139	0.63843	0.282166	-0.561754	0.370854	-0.296198	0.0735753	0.786724	-0.261347	0.203695	-0.190176	-1.19416	1.80316	-0.184472	-0.208296	-0.655188	0.0677574	-0.156032
332	-1.09631	-0.156284	-1.03445	-1.30884	-0.0402411	0.096856	0.0083721	-0.23903	-0.14691	-1.34204	-1.3335	-1.08505	-2.3615	0.875902	0.95342	0.0174417	-0.59671	-0.080401	-0.499588	0.574385	-0.300161	0.112921	0.924773	0.0564385	-0.292609	-0.481856	-0.989963	0.653725	-0.0107157	-1.22724	-0.340939	-1.14267	0.228077	-1.29829	0.126782	0.641462	-0.735962	0.383534	-0.835898	0.548657	0.978972	0.738396	-1.57116	-0.379123	-0.42031	-0.343257	-0.747884	0.663999	0.852855
617	-0.201747	0.044058	-0.145981	-1.16953	-0.44746	-0.353192	-0.254689	-0.56059	-0.424947	0.0389168	-0.502223	-1.51933	1.52794	-0.269758	-0.482333	-1.09451	0.420776	0.0803842	-1.42958	-0.13042	0.125731	-0.724488	-0.788427	-0.579322	-0.0816969	-0.783349	-0.282607	-0.695175	-0.11448	-0.716617	-0.357797	0.0982968	-0.976131	-0.183182	-0.67892	-1.03973	-0.158378	-0.315547	0.517857	-0.665421	-0.248573	-0.0917472	-2.2479	-0.784437	-0.463622	-0.416333	-0.356144	-0.453708	-0.167713
625	1.25244	0.0812871	1.1463	-2.10221	-0.416382	-0.0210067	-0.170076	-0.443107	-0.3813	0.250589	0.800379	1.44171	0.0388023	-0.709998	0.88649	-0.620393	-0.404989	-0.0269722	1.21778	0.26854	-0.159441	0.397174	0.31278	-0.88652	0.0775767	0.988897	-1.52955	0.0170535	-0.0654003	-0.706181	-1.76488	0.53142	0.833873	0.627771	-0.0328576	0.603028	0.829864	0.112516	3.11197	0.0913273	0.0298242	0.381244	2.8993	1.86357	0.380168	-0.172947	-1.03067	0.207138	0.813248
7	0.0830936	0.067116	0.236048	0.474446	0.223035	0.159013	0.206805	0.391427	0.173438	-0.262219	1.90438	-1.02321	0.111513	-0.641714	0.425622	0.383695	1.70627	-0.0612769	0.21401	0.193484	-0.24394	-0.129405	0.221248	-0.740056	0.0251872	-0.0632002	0.105149	0.341815	0.274401	-0.0077087	0.0174629	0.567668	-0.0903059	-0.176837	0.152561	0.157354	0.0576472	0.178949	-0.379725	0.00882151	-0.0318318	0.217173	-1.03494	0.663537	-0.666521	-0.158889	-0.813292	-0.275256	0.00284934
8	-0.868978	0.0876541	-0.853506	0.962792	0.226134	0.0369209	0.29091	0.552866	0.288001	0.551832	-0.780064	-1.34078	2.4558	-0.163318	-0.94906	-0.303077	0.221473	-0.0508583	0.133997	-1.01491	-0.111622	-0.988508	-0.532362	-0.716687	0.0827142	-0.133961	-0.0107932	-0.262335	0.253274	0.432106	0.314902	-0.118969	-1.87521	0.754343	-0.220789	-0.182771	-0.49735	-0.0975324	-1.44571	-0.275233	-0.386155	-0.0439565	5.02042	-0.511611	-0.934396	0.0658974	-0.1677	-0.244326	-0.802228
9	1.20676	0.0897535	1.12287	1.09779	0.127757	0.602712	-0.134895	0.812897	-0.0185656	0.088842	0.63416	5.52819	0.294035	-0.100727	1.05061	1.06114	-0.105158	0.213729	1.16527	0.0264423	0.135617	1.36542	-0.660159	-0.340962	0.0578238	0.218208	0.550907	-0.385437	-0.192405	0.82162	-0.393074	1.09219	0.499122	0.882909	0.443545	1.85209	0.699577	0.12671	4.19734	-0.100477	0.216342	-0.252281	6.5128	3.3365	2.22165	0.25389	0.501478	-0.415472	0.276998
12	-0.989022	-0.273782	-1.1611	-0.323978	0.0229347	-0.206374	-0.161514	-0.00230277	0.00241401	-0.584252	-1.59406	-1.73175	0.256916	0.639319	-0.831872	-1.29033	-0.551798	-0.0503179	-0.528476	0.268746	-0.0402896	-1.1889	-0.985142	-0.495691	-0.291747	0.0300171	-0.305096	-1.11623	-0.00968973	-0.827988	-0.265205	0.226057	-1.79635	-0.0432777	-0.196362	-1.29154	-0.67521	-0.787373	-0.823163	-0.647633	-0.963287	1.0371	-1.25534	-1.05283	-0.809553	-0.398921	-0.17214	-1.16052	-0.889948
23	-1.34551	-0.438485	-1.24715	0.00145068	0.0725138	0.0220454	-0.0312996	0.500083	0.151724	-0.326667	-0.192632	3.47218	-0.608439	0.653472	-0.0255079	0.213847	-1.31934	0.055377	-0.12483	1.70201	0.0814155	0.751903	-0.569635	-0.515762	-0.501255	-0.0557958	0.680845	-0.506332	-0.0567357	-0.493724	-0.226689	0.268605	1.38352	0.0975488	1.1206	0.620866	-0.812226	0.225811	1.99178	0.265674	-0.131775	0.219337	-1.19116	1.87662	0.629423	0.0508071	0.0482147	-0.924294	0.459731
13	-0.220054	-0.151979	-0.143406	1.78012	-0.680877	-0.416171	-0.37975	-0.703758	-0.634576	-0.937021	-0.72904	-3.70346	-0.16729	0.270536	-1.36328	0.396084	0.0547343	0.0454737	-0.537591	-0.0178112	-0.160532	-0.730605	-1.38039	-0.561034	-0.417235	-0.155042	-0.473645	-1.35628	-0.224958	0.293778	0.483	-0.310309	-2.89977	-0.387577	-1.13247	-0.732212	-0.173143	-0.174698	-0.844646	-1.05477	-1.0677	-0.977834	-3.50663	-1.60692	-1.17376	-0.689484	0.0755983	-1.07178	-1.36355
16	-0.188623	-0.167141	-0.151576	-0.901302	0.480328	0.27647	0.679167	0.557242	0.49812	0.0669182	0.714862	-0.365331	-0.284941	-0.765726	-0.922391	-1.53774	-0.244776	-0.110784	-0.0803744	1.8481	0.132835	0.330568	-0.840779	0.217327	-0.189098	0.124418	1.26957	-0.976185	0.563365	-0.550626	0.153192	-1.23356	-0.569658	-0.805338	0.283274	-0.108427	-0.0130577	0.283516	0.0677527	-0.388242	0.0110165	1.40377	0.511048	0.850876	0.377194	0.432537	0.630689	-0.507536	0.817523
17	0.830463	0.100173	0.871168	0.153678	-0.0114228	0.338231	0.491914	0.00325422	-0.0179332	0.405548	0.0410083	0.346649	-0.419747	1.55743	-0.222031	0.619997	0.534373	0.112028	-0.987261	-0.594514	-0.0117106	0.212659	0.614101	1.163	0.0379734	0.084199	0.513322	-0.126742	0.394965	0.326846	-0.468562	1.00216	0.258367	-0.549283	0.052752	0.356439	0.402357	0.776151	-1.89808	0.291282	-0.185545	0.373862	-0.36431	0.427544	0.829523	0.143299	0.724945	0.164794	0.303013
18	0.339919	0.0934914	0.317309	1.53717	-0.519432	-0.172385	-0.214668	-0.180312	-0.531734	0.484327	0.293434	-1.19926	1.5341	-0.668564	-1.46883	0.742569	0.802605	0.167286	-1.94278	1.51157	0.0831869	-0.801795	-2.62707	0.644197	0.0143926	-0.0426685	0.389123	-2.32061	-0.113641	0.893221	0.901622	0.227052	-2.71642	0.156408	0.299394	-0.339415	-0.11583	-0.0959722	0.115135	-1.14199	-0.861749	-0.29949	-1.64866	-0.48086	-0.49079	-0.675466	0.624948	-0.742428	-0.817876
19	1.30384	-0.0476727	1.36441	0.0225553	-0.400451	0.0146884	0.225684	-0.508225	-0.399749	-0.608805	0.328982	-2.17351	-0.272069	0.020961	-0.832872	-0.376715	1.50754	-0.0883814	-0.00774965	-0.984582	0.00927653	-0.227474	-0.764859	-0.180517	-0.0353907	0.165871	0.803381	-0.921808	0.313311	-0.61806	-0.159131	1.2829	-1.43185	-0.0258051	-0.11534	-0.598513	0.670261	-0.110687	-1.67954	-0.480864	-0.125021	0.345581	-1.89807	0.0868903	-0.649352	-0.537925	-1.18815	-0.241605	-0.780641
20	-0.247861	-0.0160682	-0.351482	-0.696859	-0.139229	0.200273	0.336029	0.122964	-0.139005	0.230101	-0.344704	1.33007	-1.00915	0.6314	-0.581359	0.5139	-0.595166	0.0493294	-0.237163	-0.428127	0.0994963	-0.764808	0.309518	-0.683315	-0.0534944	0.268849	-0.709059	-0.261454	0.329814	-0.806055	1.31782	-0.874539	-0.330393	-0.689121	0.0440954	0.50099	-0.46156	0.39168	2.18204	0.142072	0.137989	0.237974	0.943058	0.519446	0.385599	-0.152424	0.147651	0.145046	-1.27941
22	2.93812	0.368068	2.96153	0.0696528	2.17146	1.11853	2.11039	1.66903	2.12508	-0.0167584	0.779186	-1.15669	-0.603235	-0.142778	0.509383	-0.410015	2.17291	0.145114	2.95075	1.36364	0.213393	0.141419	0.763405	0.244005	0.636896	1.94544	0.875194	1.48844	1.62166	0.383458	1.61151	1.7054	-0.293307	-0.182676	0.49105	0.195023	1.64207	0.750973	0.584225	0.624766	0.513447	0.532285	-0.191598	0.408434	0.11149	1.81779	-0.301424	0.386493	0.388628
25	-0.315788	0.196389	-0.234896	0.140716	1.17814	1.20483	1.17927	0.920952	1.30649	0.039177	0.0461956	2.48398	-0.607081	1.86316	1.34456	0.50933	0.14238	0.21408	1.59246	1.20961	0.124438	1.26069	1.2035	-0.0755538	0.277481	0.636316	0.558638	1.74735	0.870997	0.0549379	1.58112	-0.298036	1.84508	-0.307652	0.780509	2.5501	0.102632	1.46668	3.66941	0.953437	0.420696	2.26462	2.48018	5.12554	1.43842	1.11685	0.163889	0.544011	0.87098
26	0.717689	-0.0342753	0.701389	-0.0428447	0.995647	0.912219	1.13815	0.611243	0.948674	-0.344872	0.391303	0.500042	-1.71275	-0.401081	-0.168626	-0.16971	0.48571	0.0750969	0.282669	0.645579	0.180459	0.198299	0.713261	-0.421231	-0.118834	-0.35281	0.111249	0.340829	0.800156	0.390785	1.25377	-0.258307	-0.7896	-1.83407	-0.289267	1.60053	0.50014	0.833582	3.09254	0.255685	0.0338248	1.36976	-0.659928	3.02634	0.564586	0.641515	0.431647	0.287214	0.061929
33	0.0832811	0.206131	0.130618	2.46133	-0.8421	-0.105402	0.0178981	-0.667875	-0.752158	0.366513	-0.151985	-3.91857	2.50486	-0.482797	-0.381673	0.618051	0.773617	-0.0261836	-0.553154	-1.48654	-0.0354477	-1.1718	-1.39111	0.393054	0.532033	0.084509	0.868593	-1.17019	0.033105	0.64563	-0.159106	0.408013	-1.36053	1.12375	-0.577595	-0.0975616	0.0827676	-0.571778	2.71932	-0.881695	0.0795758	0.674193	0.15458	0.34708	-1.26998	-0.745322	-0.363739	-0.237793	-1.21176
34	1.06113	-0.151013	0.862634	0.893003	-0.826068	-0.319139	-0.304066	-0.692403	-0.86802	0.685138	-0.90976	-3.83702	1.06786	-0.640726	-0.320544	0.266096	1.14486	-0.0473165	0.0930869	-0.10814	0.159056	-0.533516	-0.115882	-1.19892	-0.233691	0.076535	0.55373	-0.0326711	-0.0345314	-0.0647779	-1.30544	0.254085	0.609077	0.692337	0.0399559	-0.215942	0.169177	-0.115871	-0.37897	-0.159258	0.171123	0.356204	-4.71079	0.02826	-1.54286	-0.912522	1.44101	-0.215762	-0.40943
35	-1.81641	-0.27201	-1.58778	0.713361	0.240774	-0.0141945	0.250919	0.182795	0.330567	0.674768	0.31789	-3.76601	2.73342	1.07852	-0.886744	0.31093	0.86076	-0.118965	-0.635095	0.551539	-0.122113	-0.0664694	0.195946	-1.047	-0.399453	-1.14601	0.373432	0.00272597	0.211679	0.867462	0.637288	-0.0463125	0.954112	1.41353	0.831126	-0.315085	-1.22218	-0.133032	0.226897	0.578598	-0.338357	-0.345622	-1.82406	-0.341995	-1.2988	0.163714	1.83162	-0.449969	-0.820655
29	1.12573	0.0378151	1.07892	1.81449	0.0248105	0.159882	0.320103	-0.282638	-0.0193464	0.97357	1.13374	0.342697	3.11639	-0.906414	1.57786	0.94215	1.32218	0.09243	-0.523563	0.519224	0.143331	1.0373	-0.404682	2.02687	-0.00178686	-0.207753	1.01749	-0.198586	0.286571	1.69768	-0.775639	1.08391	1.74682	1.94561	0.142041	0.355536	0.648455	0.210549	1.85703	-0.0514698	0.863331	1.1955	-1.3038	0.270639	0.376307	-0.17005	-0.304382	0.228302	0.496561
1	1.84988	-0.192419	1.78204	-0.36901	0.13863	0.4758	0.808473	0.0427567	0.143052	0.229715	0.231511	0.0211921	-0.217444	0.215239	0.993908	0.379811	0.631602	-0.103	0.817971	3.04877	-0.121737	0.927039	0.949945	-0.555628	-0.280947	0.398127	0.508075	0.731108	0.636217	0.241859	-0.308092	0.618826	3.21591	0.0462383	1.03347	0.260171	1.32707	0.314374	-0.717351	0.795527	0.473745	0.371	-0.23869	1.81303	0.0488335	0.416643	-1.71473	-0.0646226	0.86888
357	0.702984	-0.367742	0.612654	0.639331	-0.627196	0.457914	0.00529061	-0.482515	-0.603283	0.333671	0.827344	-0.0353587	1.4866	-0.893776	0.00262387	0.487136	-0.186837	-0.118226	1.66435	0.570901	-0.122389	-0.119786	1.01879	-1.8118	-0.479546	-0.123204	0.346997	0.565768	-0.00996496	-0.339782	-1.15046	1.0031	0.381189	0.415144	-1.18623	1.53572	0.189641	0.539442	3.72523	0.0412286	-0.292967	1.01702	-0.956181	2.53714	-0.371108	-0.529933	-1.48952	-0.472307	-0.137736
191	1.09494	0.391275	1.20558	-1.92708	1.41288	0.814671	1.12452	1.32393	1.42317	-0.123958	0.00436797	2.41199	-3.28156	0.289003	0.32743	0.302974	-0.164313	-0.155146	0.479057	1.88907	-0.19127	1.09582	-0.919545	2.35741	0.42556	2.47679	0.510035	-0.790463	0.773545	-0.670089	-0.276261	0.683362	-1.05887	-1.82407	0.237143	1.24404	0.821712	0.693486	0.416166	-0.544726	-0.257745	2.44185	1.66577	1.73619	1.7316	1.35316	0.00603159	-0.486085	0.871761
186	-1.32947	0.0146025	-1.3453	2.04959	-0.50254	-0.543164	-0.658329	0.283387	-0.522551	-0.0853774	1.17113	1.28801	0.541225	-0.985325	0.6825	0.69694	-0.0391949	-0.126048	-0.967724	-0.29311	-0.145546	-1.08728	-0.772399	-1.23595	0.0060063	-0.277934	-1.03533	-0.890888	-0.588122	1.00143	0.825189	-0.261617	-1.08787	-0.0357825	-0.0426302	-0.543411	-0.706754	-0.235707	0.0647518	-0.471432	0.261047	-0.129885	1.97022	-1.84134	0.0475201	-0.543243	-0.283424	-0.0817292	-0.840601
308	-2.28125	-0.171749	-2.18989	-0.544885	-0.338375	-0.70927	-0.855083	-0.0799107	-0.267937	-0.393117	0.294081	0.268392	-0.56924	-0.937381	-1.28711	-0.296739	-1.42601	-0.213632	0.33503	-1.36217	0.0620696	-1.3031	-0.175119	-1.19153	-0.210355	0.810552	-0.69281	-0.465963	-0.686679	-0.958682	0.415928	-2.17225	-0.733607	-0.101812	-1.31764	-1.1693	-0.85187	-0.646314	-3.49289	-0.71637	-0.268134	-1.29695	0.380767	-3.65797	-0.720166	-0.438454	-0.194449	-0.412037	-1.10843
309	3.01765	0.376152	2.83771	-1.04557	0.836941	0.728626	1.14541	1.16301	0.765	-0.534729	2.8377	-0.716553	-2.65457	3.08044	2.40404	0.620587	1.14641	0.209155	1.64241	2.42478	0.339293	1.94723	-0.211081	1.38081	0.399559	0.781556	-0.814675	0.308928	0.789714	0.0734911	-0.377639	1.24125	0.771616	-1.69538	0.50727	0.918486	1.74302	0.679247	0.194724	0.141909	1.43306	2.11517	0.205712	-0.334857	-0.197751	0.444916	-0.972809	0.31041	1.47077
368	0.964065	0.20394	1.06369	0.563275	1.55286	0.859639	1.56714	1.42074	1.52463	0.178412	0.334478	-3.44914	0.00897923	0.084866	-0.322054	0.57749	1.39805	0.13804	1.78397	1.53585	0.270504	-0.56326	-0.461467	0.631158	0.537566	0.551564	0.917539	-0.318286	1.22215	0.315923	0.844403	1.50917	0.00770318	-0.225063	-0.157914	-0.534354	0.388087	0.0200471	-1.75707	-0.294322	1.23973	-0.237844	-2.10055	-1.6953	0.0832793	1.20811	0.830481	0.83811	-0.719818
178	0.123494	-0.140199	-0.0145606	-0.215945	-0.340695	-0.220903	-0.220203	-0.101536	-0.270439	0.38184	-0.0530015	-0.965641	-1.08268	0.362088	-1.13152	1.811	-0.228591	0.0494397	-1.6448	0.32849	0.0735588	-1.09701	0.0130867	2.69615	-0.20294	-0.903428	1.83252	0.113661	-0.349305	-0.389078	-0.67875	-0.0475242	-1.42175	-1.26072	-0.340858	-0.184999	0.0150076	0.0753127	-3.10263	-0.129063	-0.891704	-1.03823	0.165683	-2.30227	-0.336736	-0.100405	0.0558062	0.117515	-1.09285
179	0.459336	0.352889	0.402191	-2.57866	0.167358	0.083696	-0.00615774	-0.0464218	0.165428	-1.29889	0.316613	0.234164	-1.6184	0.377156	-0.603639	-1.71908	-0.155741	0.249034	-0.287173	0.0466451	0.0151175	-0.796703	0.53718	0.420991	0.409839	-0.190286	0.670463	0.375224	0.0881242	-1.49877	-1.37498	-0.374053	-1.8593	-0.433121	-0.934572	0.176942	0.0946515	0.189515	3.28475	-0.104161	-0.291424	-0.54652	-0.0606736	0.918557	0.339147	0.164115	-1.39257	0.122065	-0.498251
180	-1.30296	0.013472	-1.22474	0.844358	-0.753866	-0.678078	-0.776129	0.00739731	-0.719944	-0.422711	-1.54441	-0.258308	0.490861	-0.846199	-1.29609	0.53581	-0.632082	-0.0279937	-1.25803	-1.87766	-0.0198272	-1.42311	-0.688644	3.56092	-0.0583252	-0.83825	-0.15669	-0.816985	-0.640001	0.272984	0.769778	-1.62036	-2.03727	-0.777124	-0.535995	-1.37004	-0.864123	-0.732855	-2.25035	-0.628532	-0.462293	-1.33746	-0.0773045	-2.94826	-0.633154	-0.540415	-0.496875	-0.389998	-1.37862
169	0.272716	0.135049	0.268311	-0.0284611	-0.408352	0.0731061	-0.210949	-0.39651	-0.432658	0.388883	-0.703429	-0.767931	0.862141	0.094833	-0.339422	0.0203908	0.642096	0.0694772	-1.13862	-1.73774	0.0883111	-0.418343	1.02484	-0.29921	0.230511	-1.03461	1.19548	0.918441	-0.11643	-0.437362	0.698959	0.715144	0.72067	0.00917599	-0.216741	0.968306	-0.0157351	0.722013	0.412627	0.621274	0.39624	-0.441069	-2.00406	0.710281	-0.311735	-0.428893	0.628223	0.815424	-0.771509
189	2.9805	0.31003	2.65016	1.35898	-0.899093	-0.408441	-0.726783	-1.00859	-0.824217	1.03692	2.79821	0.550231	2.48201	0.202706	-0.45126	0.524653	0.220373	0.0373981	1.70789	-1.44988	0.0304945	0.277288	-0.886926	2.2129	0.350402	1.11495	-0.0620966	-0.817569	-0.616128	1.82695	0.0422474	-0.101737	-2.11921	1.05861	0.374779	0.107085	1.83006	-0.264454	2.61725	-0.256448	0.0922231	-0.626203	0.720756	2.11628	0.316532	-0.464112	0.37164	0.240868	-0.804277
383	-0.695593	0.121785	-0.859473	-0.846285	-0.292307	-0.433959	-0.627826	-0.341485	-0.276624	0.3215	1.57832	2.45188	-0.205991	-1.9254	-0.809958	-0.700142	-0.664058	-0.113495	-0.535687	-1.02491	-0.0605906	-0.0517304	-1.70988	-0.995476	0.0684953	0.345393	-0.662627	-1.60798	-0.532232	0.277637	-0.195558	-0.850053	-2.58663	-0.775581	-0.910596	-0.558757	-0.420882	-0.521328	-0.615384	-1.4624	-0.316322	0.117206	-0.30534	0.415047	-0.11585	-0.256663	0.994124	0.0685818	-0.155594
370	0.82222	-0.236848	0.795378	0.849449	1.71748	1.16772	1.70319	1.32334	1.70393	0.500538	0.891932	-0.458125	0.141552	0.789737	-0.0997303	1.34773	1.20008	-0.00509835	1.85014	0.791569	0.013962	-0.173378	0.117431	-0.485911	-0.271263	0.174438	1.02601	0.0838557	1.17713	0.550889	-0.391908	0.479131	0.922351	-0.334928	-0.201349	1.88724	0.471431	1.87763	4.93505	-0.0823688	0.448654	0.771681	-1.93353	4.60179	0.797715	1.38354	0.369869	0.378806	0.660302
951	0.918233	0.0819548	0.941349	0.109143	-0.625833	0.0426071	0.0634952	-0.336774	-0.663189	-0.370347	0.73992	-1.06783	-1.71167	-1.36901	1.63378	0.0475099	0.492636	0.247911	-0.390297	0.44708	-0.0313976	1.04022	-0.724496	1.14776	0.0834919	0.25688	-0.448051	-0.508746	0.0318351	0.30948	-0.170564	1.72919	1.12038	-0.769075	0.871054	0.742397	0.328853	0.247797	-2.39907	0.16542	1.10334	1.96583	0.775885	1.86526	-0.753848	-0.255857	-0.832169	0.320106	0.464505
254	0.312114	0.1664	0.200696	-1.16039	-0.160468	-0.315036	-0.479056	-0.614431	-0.129493	-1.98409	0.0229281	1.88405	-2.63471	-1.03459	0.0516764	-2.24991	0.114161	-0.1542	0.411151	1.20807	0.0271679	0.49243	1.05778	-1.32388	0.192412	0.146469	-0.266029	0.749577	-0.290101	-0.0598411	-0.543471	0.134884	1.20821	-0.878235	0.0978201	-0.0140347	0.322189	-0.0529078	-1.35031	0.559205	-0.171075	-0.512456	-1.58816	0.324579	0.397421	-0.211242	-1.24581	0.0565739	0.471028
163	2.40432	-0.0956463	2.39362	0.981777	0.263353	0.29344	0.477496	0.00951667	0.363587	0.98048	0.218101	0.227721	2.04501	-1.13601	-0.339779	1.09308	1.22661	-0.00595417	0.992915	0.780887	0.219988	0.150733	-0.0177939	0.727239	-0.0664213	-0.000312027	0.915264	0.0537931	0.352124	0.4682	-1.18092	1.05992	0.421105	1.38987	-0.30329	0.270065	1.24528	-0.015524	-0.480951	-0.126541	0.525729	0.342536	0.542227	2.73549	0.207085	0.319369	1.71598	-0.008891	-0.238404
161	0.139162	0.144617	0.0759809	1.04944	0.0984014	-0.0340618	-0.467165	0.072489	0.145067	0.309126	0.0654703	4.49565	0.381821	1.27015	2.05179	0.210488	-0.565667	0.345387	1.28181	0.11451	0.267667	0.953449	0.918776	0.357014	0.1523	0.304772	1.28877	0.944791	-0.419665	0.0684504	0.394611	-1.01174	0.226457	0.184792	1.17339	0.7626	0.309147	0.464541	0.477032	0.917669	0.674085	-0.381102	3.99869	1.0698	2.30157	0.316205	0.387554	0.708799	0.182969
140	0.0194998	-0.318323	-0.115987	0.519684	-0.481598	-0.361856	-0.53516	-0.0884837	-0.552262	-1.42536	-0.746864	-0.808822	-1.64422	0.000185609	-0.112251	-1.0512	-0.426525	0.112812	0.422806	-1.39964	-0.00652747	0.0171662	0.748663	-0.295592	-0.387569	-0.638246	1.00667	0.774998	-0.271873	0.0816252	-0.0490135	2.14149	0.0988545	-1.30745	-0.415248	-0.440753	-0.18674	-0.178466	0.965719	0.283804	0.136589	0.0334336	-0.514125	-0.677336	-0.475824	-0.565326	-0.909442	-0.539679	0.0277323
165	-2.67157	-0.275564	-2.6269	1.38921	-0.547916	-0.494863	-0.912427	-0.301691	-0.521837	0.592649	-1.7013	-0.114597	1.66557	1.41436	-0.652187	0.587957	-0.868324	-0.0338773	-1.87249	0.606179	-0.142512	-0.531252	-0.722249	0.656565	-0.421339	-0.468481	1.37721	-0.665076	-0.798775	1.04555	0.693688	-1.90199	-0.568553	0.471119	-0.859106	-0.366029	-1.38725	-0.221981	-2.01912	-0.870151	-0.899224	0.741298	-0.295161	-0.935248	-0.17507	-0.542192	0.976689	-1.10886	-0.331833
164	-0.906518	-0.0494042	-0.579652	0.63445	-0.259805	-0.366141	-0.512781	-0.252238	-0.229054	-0.615362	-0.519617	2.22627	-0.347739	-0.469882	-0.291167	-0.114307	-1.3901	0.0619406	-1.59008	-0.446854	-0.167002	0.339344	-0.473992	-0.373491	-0.0410756	-1.01243	-1.12745	-0.62361	-0.410999	-0.253034	0.0298691	-1.31022	-0.285964	-0.53242	0.298772	-0.37235	-0.779896	-0.11777	-1.74339	-0.252315	-0.211459	-0.940887	-0.13402	-0.156627	0.653789	-0.118517	-2.14214	-0.268489	0.264274
160	-0.0193479	0.126417	0.0644764	-0.258893	1.43588	0.737504	1.08593	0.981357	1.35072	0.567173	0.586898	-0.223125	-1.12372	1.68957	0.917826	0.601097	0.198431	0.0424471	0.167765	-0.185134	0.111015	0.99231	2.4083	0.757577	0.270008	0.964704	0.232932	3.57927	0.777073	-0.295778	-0.343565	0.645451	0.785195	-0.139541	-0.0535868	0.882288	0.187863	0.561209	-2.76789	1.67985	0.618412	0.220241	0.545092	0.0159245	0.932154	1.29323	0.72859	0.491726	0.728103
155	0.286991	0.0469726	0.266285	-0.988918	-0.294926	-0.350492	-0.316875	-0.444782	-0.352624	-0.268638	0.970235	-0.858648	-0.54815	-0.790443	0.236103	-0.0635398	-0.342722	0.0334232	-1.14714	-0.474113	0.220861	-0.0641365	0.285762	-0.146328	0.0604259	-0.43909	0.270745	-0.0685989	-0.292848	-0.8817	1.47164	1.5842	-0.39948	-0.575614	-0.581289	-1.24448	-0.0357077	-1.13701	-1.31478	-0.105902	-0.37809	-0.52112	1.05342	-1.26684	-0.431694	-0.41835	-0.582936	0.301772	-0.140823
145	2.23437	0.100554	2.10169	1.19566	-0.101308	-0.32187	-0.269856	-0.58775	-0.140122	0.864093	-1.45696	-0.691918	3.23941	-0.45268	-0.365987	0.0132723	0.571014	0.0380508	-1.02903	-1.01524	-0.000333201	0.341271	0.0278848	0.432591	0.159651	0.147535	0.617813	0.0942713	-0.193138	0.703015	0.946638	1.2857	-0.998969	1.92748	1.81221	-1.17959	1.80668	-0.708675	-3.65437	0.960588	-0.0503703	-1.80829	0.252854	-2.78894	0.0968708	-0.129354	2.13451	0.199837	-0.157341
154	0.874685	-0.276954	0.754948	-0.0255198	-0.499871	-0.276516	-0.311274	-0.46059	-0.53001	-0.2371	1.41997	-1.42227	0.0209898	-1.64869	0.154514	-0.166634	0.116439	0.0806902	0.0712589	-0.456475	0.179161	0.537597	0.507889	-0.754056	-0.331149	-0.507672	-0.65914	0.404855	-0.221259	0.126192	0.163139	0.229262	0.712302	-0.190805	0.469806	-0.354404	0.2917	-0.581537	1.54773	0.519899	-0.189175	0.479967	0.470276	0.826589	-0.64796	-0.565737	-0.651526	-0.506256	-0.0789143
146	-0.947729	-0.0400989	-0.764191	-1.02935	0.45057	0.352957	0.7925	0.775334	0.539918	-0.746672	-0.44509	0.186199	-2.10087	-1.24265	-0.000263012	-0.141049	0.837757	-0.0718317	-1.14972	-0.352918	0.105009	0.102817	-0.0888473	-0.553994	-0.0772771	-0.635296	0.513959	-0.364366	0.464582	-0.71121	-0.25502	-0.0752342	0.757125	-0.376236	0.291606	0.433692	-0.433777	0.164513	-1.37277	0.18818	0.229183	0.102985	0.0924463	-0.816763	-0.349224	0.417118	-1.02225	0.259351	-0.349201
149	2.12248	0.218425	2.20879	1.2699	0.566955	0.397309	0.718753	-0.171573	0.471654	-1.19674	0.15004	-2.21097	-1.47304	0.393886	-0.832666	-0.357537	0.999692	0.031919	-1.06755	-1.42904	-0.00730479	-0.862362	0.532053	0.504603	0.250403	-0.307279	-0.457687	0.0264971	0.738377	1.10064	0.644523	1.35067	-1.39995	-0.767953	-0.626145	-0.61563	1.38973	-0.252111	-1.62068	0.0560854	-0.580215	-0.53745	-1.50427	-1.27023	0.737751	0.387068	-0.592847	-0.318255	-0.642256
157	-0.581646	0.184826	-0.542409	-2.33479	0.492708	0.118234	-0.0898516	0.00397528	0.337653	-0.183836	0.239264	3.47742	-0.43113	0.687275	1.37358	-1.01204	-0.387484	0.0563959	1.92609	-0.248348	0.0780524	1.0281	1.03442	0.876511	0.290093	1.01404	0.910982	1.10997	-0.0960929	-1.47696	0.917651	-0.398964	1.47465	-0.117553	1.62925	0.658679	-0.184279	0.527128	0.288792	1.21158	0.225576	-0.60593	2.71413	-0.642873	0.816602	0.350249	-0.0942679	0.642667	0.29008
151	-1.38958	-0.185241	-1.4124	-0.451231	0.609944	0.08673	0.226915	0.397099	0.505941	-0.722039	1.56134	1.97961	-0.282079	-0.450779	-0.347181	-0.392021	-0.66133	-0.0519754	2.56981	-0.248113	-0.0759225	0.279699	0.0703533	-0.0398676	-0.232771	0.94745	0.126057	-0.131689	0.159218	-0.217329	0.0859005	-0.529743	-1.58171	-0.234234	-1.24479	-0.489249	-0.871476	-0.367719	-1.99316	-0.600999	-0.430282	0.357489	2.18139	-0.764024	0.516293	0.302078	-0.70032	-0.243348	0.23632
152	1.0268	0.260218	0.889592	-1.69831	0.455697	0.555328	0.396609	0.423824	0.332461	-1.37534	0.347527	-0.520579	-2.32465	0.862792	-0.193911	-0.845996	0.776528	0.354031	1.4202	-1.72345	-0.00911038	0.16393	1.86396	-0.471747	0.355821	-0.309617	0.030384	1.28477	0.538433	-0.779887	0.159597	0.410576	0.327252	-0.448573	-0.00283178	0.696747	0.407384	0.634615	2.28634	1.03917	0.752005	0.676003	0.125085	0.0950639	0.700967	0.310709	-1.45061	0.542788	-0.362937
158	-1.48217	-0.380638	-1.50817	-1.56872	0.0571312	0.0689392	0.219002	0.0298621	0.0733639	0.316385	-0.554911	-0.0415154	-0.434833	2.63611	-0.940262	0.241851	-0.62322	-0.109569	-0.341192	-0.944258	-0.112606	-0.338258	0.155394	0.476889	-0.443652	0.983681	-0.427768	0.280878	0.244021	-0.529325	0.637256	-2.50605	-0.475775	0.22812	-0.156709	-0.520593	-1.20153	-0.11833	-2.96955	-0.212664	-0.314458	0.116202	-2.00292	-2.41309	-0.359975	0.00430476	-0.22629	-0.802712	-0.127575
153	0.208351	0.196238	0.121261	-0.365929	-0.913177	-0.630819	-0.728633	-0.999805	-0.769142	0.635941	1.10973	-1.50049	2.935	1.15287	-0.727862	-0.775396	-0.254734	-0.0463109	-1.68152	-1.41486	0.20171	-0.0748473	-0.686752	0.620312	0.103211	-0.295653	0.89507	-0.781411	-0.607012	0.341679	-2.12544	-0.273705	-0.702697	1.55448	-0.4669	-1.54735	0.272288	-1.09266	-0.870193	-0.541699	-0.233038	0.0179856	0.651995	-2.11196	-0.940409	-0.829624	0.720675	-0.510513	-0.473829
384	-0.52091	0.316504	-0.602266	-0.0966458	-1.01379	-1.13763	-1.4554	-0.596335	-0.977408	0.0842337	1.00753	1.9593	0.592706	-2.12337	-0.716641	-0.0590776	-1.08588	-0.097664	-0.430215	-1.05747	-0.0342985	-0.323635	-1.70642	-0.178093	0.712964	-0.20624	-0.151992	-1.40317	-1.1844	0.0361928	0.152704	-0.252633	-1.14482	0.332494	0.459835	-1.75218	-0.416224	-1.36476	-1.42641	-0.418861	0.0271963	-1.60816	7.53355	-1.69317	0.0827064	-0.919435	-0.167853	0.824166	-0.497284
255	0.379218	0.165661	0.305098	-1.68386	0.306653	0.252759	0.0499121	0.104993	0.277347	-0.00373613	-0.867849	3.29278	-0.236394	1.13899	1.06156	-0.191035	-0.400461	0.0897614	0.730788	0.297043	0.0469075	0.453248	0.575737	0.793148	0.317855	0.116056	-1.04469	0.594062	0.0879927	-0.355014	0.664943	-0.368158	2.32319	-0.337982	-0.0473449	0.747778	-0.0486711	0.285449	0.267437	0.378502	0.917669	0.210957	-1.49322	1.55985	1.44862	0.557101	0.186421	-0.327068	1.53263
259	-0.46136	-0.207872	-0.585267	-0.367445	-0.931458	-1.44988	-1.80486	-1.23506	-1.10433	-0.39424	-1.24117	3.05081	-0.0940352	1.00427	-0.507795	-0.683544	-1.36026	-0.0283811	-0.498999	-1.25632	-0.119692	-0.297979	0.773508	-0.617809	-0.259562	-0.243857	0.524315	0.558084	-1.59464	-0.738151	-0.615356	-1.26787	-0.24803	-0.141048	-0.318061	-1.37227	-0.268804	-1.19544	-1.70671	0.277676	-0.109861	-2.08901	3.26153	-2.73736	0.458242	-0.903404	-0.885885	-0.0455883	-0.515757
260	1.763	-0.0669699	1.52235	0.628847	-0.289364	-0.0650515	0.122284	-0.89482	-0.305049	-0.115602	0.103635	-1.72139	-0.524897	0.0795582	0.471853	-0.796857	0.971898	-0.0583358	0.688517	-1.56501	-0.165285	-0.289818	1.6466	-1.70742	-0.0994924	-1.08215	0.0545897	1.74115	0.117113	0.617429	0.328266	0.419713	1.46476	-0.25256	0.253844	-0.70398	0.984793	-0.32203	-1.57993	1.14977	-0.24255	-0.416411	-1.15575	-1.75366	-1.10123	-0.393236	0.24483	-0.0645588	-0.495058
261	-0.276764	0.122473	-0.487091	-0.150875	-0.393777	-0.198231	-0.276832	-0.640793	-0.436236	-0.527916	-0.606956	-1.8153	-1.27331	-0.102451	1.74181	-0.754538	0.128897	-0.0741048	1.11176	-0.267978	-0.172622	0.979298	2.34092	-1.43584	0.129971	-0.685929	0.197112	2.87221	-0.195311	0.563922	-0.244223	-1.04127	2.03394	-0.529016	-0.70298	0.120094	-0.114373	-0.0323692	0.962287	1.23135	-0.0758528	-0.475384	-0.394029	-0.651633	-0.576819	-0.642227	-0.216839	-0.248609	0.548608
262	1.15978	0.0574164	0.977853	-2.14044	-0.55444	-0.222457	-0.205893	-0.720964	-0.609836	-0.129623	-0.489001	-2.36688	-1.08015	0.990746	-0.876366	-0.211091	0.205775	-0.0624526	0.457332	-2.32936	-0.197017	-0.911962	1.86593	-1.18628	-0.0635977	-0.757677	-0.223344	1.55614	-0.159371	-1.13607	-0.147374	1.72449	-0.731124	-0.0158073	-0.0856145	-0.167248	0.705541	-0.484569	0.858185	0.882595	0.470917	-1.48873	-0.190861	-1.11017	-0.670155	-0.510844	0.68081	0.940736	-0.753738
263	2.48561	0.0534435	2.16678	0.0456639	0.6739	0.389265	0.833758	0.541573	0.620201	-0.70873	1.29873	-1.17882	-1.50613	-0.67117	2.03132	-0.22196	1.32308	-0.155447	1.82122	0.150514	-0.311868	1.57794	1.71101	-1.14403	0.0395301	-0.0797336	-1.14249	1.63907	0.651675	0.686606	1.19389	1.88378	1.64223	-0.123707	0.0388074	0.123315	1.54119	0.156815	0.516162	1.03039	0.682625	0.278366	0.749009	-0.501959	0.254881	0.584352	0.198327	0.576035	1.22873
264	-1.8103	-0.0374882	-1.8111	-0.9158	0.44746	0.215361	0.238972	0.0613993	0.403295	-1.28796	-1.07304	-2.06188	-1.41653	0.462423	-0.19525	-1.06723	-0.00470224	-0.106305	0.219278	-0.680935	-0.289153	-0.800576	1.13333	-1.17913	-0.103779	-0.662916	0.259107	0.985119	0.371574	-1.11816	0.187051	-0.782539	0.510284	-1.11458	-0.21869	0.149904	-1.14614	0.274125	-2.26482	0.439195	0.0606371	-0.0646988	-1.83142	-1.32545	-0.87591	-0.0544338	-1.71978	0.133477	-0.333466
265	2.54671	0.173078	2.36601	0.234592	1.23771	0.788966	1.53734	1.61044	1.20902	0.212192	2.21587	-0.219529	-0.29193	-0.730325	0.408016	-0.0231641	1.6527	0.157688	1.13766	0.252279	0.358956	0.252289	0.0995715	0.210097	0.161589	0.419946	1.88362	0.314961	1.0492	0.524319	-0.674163	2.1694	-0.529325	0.0708268	-0.368306	0.188248	1.64811	0.475051	0.375284	-0.145036	-0.000111036	0.328646	0.0257889	0.139617	0.00285877	0.997065	0.760435	0.188127	-0.00914379
266	-0.370802	0.209474	-0.384182	0.962882	0.193846	-0.385105	-0.244515	0.0877453	0.223343	-0.549916	-0.270276	0.143226	1.46325	0.589773	-0.377378	-0.583132	0.406951	0.156295	-1.17992	0.167212	0.053193	-0.766958	-0.423196	-1.05985	0.256807	-1.54655	0.928208	-0.409607	-0.119522	0.513027	0.803969	0.393347	1.15524	1.26766	-0.0146436	-1.13826	-0.273695	-0.322374	-2.09679	-0.332095	0.294851	-1.04664	-0.384763	-1.6034	0.0533796	-0.0395182	-0.643016	0.323063	-0.242696
267	2.65892	0.338126	2.29394	-0.977803	-0.483773	-0.326903	-0.286948	-1.10444	-0.526549	0.0762094	1.42367	-1.86138	-2.36948	0.841002	1.19943	-0.623913	0.934013	0.139631	1.33744	-0.379706	0.0335324	-0.150577	1.41981	-0.713025	0.33702	-0.54589	-0.628804	1.8422	-0.161344	0.143025	-0.869058	1.59245	2.02987	-0.564189	0.692002	-0.737855	2.30006	-0.653019	0.299655	1.29387	0.319554	-1.512	-0.537464	-1.51376	-0.118498	0.172823	1.10783	0.241607	-0.493733
268	0.593941	0.00208146	0.48788	-1.22664	0.619419	0.0762303	0.324576	0.254721	0.649289	-0.260828	0.595811	0.184205	-1.80822	0.99711	0.753708	-1.04132	-0.0169436	-0.111335	-0.295465	-0.708282	-0.0206591	0.57511	1.34125	-1.48671	-0.00363217	-0.0737384	-0.45362	1.35588	0.311324	-1.04855	-0.243951	1.9122	1.34427	-1.72233	-1.03743	-0.720227	0.0232366	-0.687036	-0.89256	0.284026	-0.0981344	-0.267596	-0.471678	-1.8935	0.152878	0.570246	-1.31121	-0.225811	0.721448
270	0.862826	-0.0140074	0.682895	-1.72786	-0.791343	-0.421245	-0.473983	-0.440909	-0.817386	-0.863264	0.265167	0.144843	-1.18464	0.518467	0.112734	-0.634391	-0.175941	-0.0428232	1.77854	-1.82252	-0.0957685	-0.716152	1.50464	-0.191851	-0.0478759	-0.494709	0.0793651	1.24443	-0.4242	-1.27174	-0.053831	0.0172807	0.566405	-0.638517	-0.0853434	-0.569094	0.364691	-0.41852	1.05395	0.867444	0.0172003	-1.1765	-0.0845727	0.26036	-0.926969	-0.53819	-0.896569	-0.268907	-0.600213
272	-1.29002	0.0243939	-1.2318	-1.88992	-0.563001	-0.419744	-0.373415	-0.084708	-0.487503	-0.429412	-0.892389	-2.10749	-2.50505	-0.709742	-1.14748	-1.1606	-0.51651	0.169957	-1.11944	-0.767696	0.224853	-0.550516	-2.06022	0.427848	0.136606	-0.828122	-0.155308	-1.5881	-0.216278	-0.299415	-0.557535	-0.78938	-2.08528	-1.78478	-1.22482	-1.17246	-0.832226	-1.15591	-3.0112	-1.4696	-0.627313	-0.841894	-3.35578	-2.6763	-0.399663	-0.367498	-0.643543	-0.369519	-1.15075
275	2.41016	0.209507	2.30106	-1.12367	1.82787	1.00603	1.84737	1.16979	1.81233	0.00151996	3.52137	0.610947	-1.18944	2.25184	0.517551	-0.00897773	1.26613	0.0201872	0.834065	-0.161387	0.106589	0.857657	2.21746	-0.680442	0.336735	0.762582	-0.0795818	2.75703	1.29161	-0.299443	1.44725	1.52593	2.03981	-0.132514	-0.0104469	0.602121	1.66951	0.973372	-0.197654	1.41791	1.29409	-0.313873	-0.685648	-1.64355	1.27501	1.49283	-0.477266	0.733891	0.0843879
278	0.263778	0.264651	0.069155	-1.41152	-0.937114	-0.909796	-1.15739	-1.1039	-1.00623	-0.459996	-0.19202	1.70969	-1.14727	1.39501	0.675092	-1.02059	-0.598245	-0.116564	-0.175109	-1.86745	-0.156753	-1.74933	0.881627	-0.725068	0.331546	0.118535	0.43924	1.07014	-1.06209	-1.27341	0.72292	0.223059	0.42124	-0.352692	0.0130886	-0.783293	-0.0354388	-0.68492	-0.850104	0.446594	0.0212329	-1.81552	-0.318752	-2.18281	0.282885	-0.570061	-0.5419	0.267986	-1.38323
279	2.77395	0.155458	2.73862	-0.901762	-0.89035	-0.357717	-0.250411	-0.893743	-0.770252	-1.31635	2.99171	-0.512042	-2.10588	1.24278	0.121231	-1.05523	0.910684	0.0463108	-0.204617	-1.49801	-0.0419274	-0.658072	0.751501	-1.13967	0.158308	-0.730727	-0.707205	0.572746	-0.114273	-0.544971	-0.0149065	1.30601	-0.968198	-2.03918	-0.187468	-1.01113	1.3899	-0.757666	0.803425	0.418864	-0.635882	-1.53578	-0.879432	-1.55871	-0.120324	0.257288	-1.84237	-0.198963	-0.670981
282	1.06638	0.19327	1.03597	0.318602	1.05482	1.09537	1.19663	1.41439	1.08158	0.682988	0.597805	1.13579	-0.552163	1.16962	1.76782	0.816207	1.38558	0.249138	1.99522	1.57702	0.206736	1.773	1.09115	0.186622	0.203474	1.76375	0.974327	1.22481	1.14318	0.0480083	0.220042	1.14818	2.84701	-0.958637	0.131448	2.03592	0.782209	1.23635	3.45006	0.508381	0.823048	1.6326	-0.602823	3.30208	0.225196	0.831758	1.36959	0.521156	1.32352
284	2.02624	-0.211296	1.88369	-1.23609	-0.00888479	-0.0716958	0.0446874	-0.0098298	0.0548876	-0.255794	1.16614	1.16874	-1.10146	2.09179	0.0262775	-0.229688	0.157668	-0.130618	-0.703044	-1.10433	-0.295421	-0.473572	0.995256	-0.00804547	-0.347682	-0.116825	0.171673	0.808575	-0.0498971	0.0395862	0.0763849	0.171392	0.705304	-0.632812	-0.868481	-0.570881	1.11784	0.0359472	-1.91626	0.290366	0.0345147	-0.283223	-1.02937	-0.298439	0.272821	0.0661869	0.116114	0.00135154	0.476629
285	0.219225	-0.351257	-0.224863	-0.110747	-1.22443	-0.956361	-1.23362	-0.660177	-1.19212	0.266288	0.38448	0.334379	0.152489	0.148274	-0.605531	-0.840929	-0.954753	-0.106252	-2.04737	-0.706995	-0.263966	-1.31843	-0.204892	-1.35642	-0.397726	-0.253802	-0.140617	-0.629483	-0.852847	0.177007	-0.314046	-0.409357	0.377774	0.411796	-0.615765	-1.51532	-0.185513	-1.26227	-1.04967	-0.452774	-0.999785	-1.13118	-0.824396	-1.72651	-0.774343	-1.16373	-0.663903	-0.529644	-1.25325
188	-0.0194	0.215113	-0.135239	-0.400104	0.357959	0.175426	0.276391	0.399205	0.328204	-0.831067	0.36804	1.4544	-1.83922	-0.116187	-0.0320555	-0.218723	-0.0117989	-0.126649	2.99483	0.734131	-0.188137	-0.827395	0.299744	-0.304216	0.287686	1.38926	1.2941	0.202622	0.294891	0.0774512	-1.16229	0.361857	0.641535	-0.740832	-0.295762	0.220248	0.173278	0.102679	3.19625	0.019166	0.859151	-0.188086	-0.323752	-0.0155743	0.115637	0.381341	-0.259424	0.0359903	-0.822714
385	3.75373	0.242628	3.38915	-1.19939	0.0415213	-0.0300174	0.150223	-0.069985	0.0763396	-0.81771	2.09345	2.04321	-1.47368	0.0198502	-0.555494	0.269801	0.582056	0.202529	0.422273	-0.526337	0.0210011	-0.49173	0.896094	2.75841	0.405316	-0.517201	-0.238987	1.15819	-0.00835816	-0.0427939	0.294567	2.16715	-1.04602	-0.60414	0.149519	-1.02818	2.31042	-0.156647	-0.892194	0.610624	0.631401	-1.86977	2.01225	-1.13697	1.09295	1.54693	-0.559075	0.245596	-0.868497
386	-1.92824	-0.322052	-1.87431	-1.25762	-0.241353	-0.207495	-0.435508	-0.499597	-0.224083	-0.3959	-0.78486	-0.277337	-0.354127	-0.649633	0.743432	-0.805195	-0.405185	0.00647084	1.67264	1.79942	-0.297713	0.975902	-0.225656	-1.29017	-0.480276	0.807704	-0.44113	-0.230918	-0.333732	-0.784943	-0.0165661	-1.02399	0.0883724	-1.17686	1.64133	0.467769	-0.895747	-0.00276218	3.22275	0.678132	-0.543445	0.455784	-0.0458921	1.97143	-0.00105253	-0.163564	-0.134953	-0.247147	0.596372
104	1.11368	-0.364977	0.934267	0.445147	0.302042	0.237583	0.369153	0.652537	0.306692	0.389263	2.08874	0.884694	1.15019	0.555844	-0.905041	0.490818	-0.0857705	0.0814729	0.309088	0.647879	-0.0228589	-0.928187	-0.899142	0.311091	-0.507172	-0.919235	-0.411322	-1.15789	0.176609	0.857193	0.204564	-0.721838	-0.998948	0.739869	-0.786887	0.415646	0.386794	0.263658	5.09643	-0.796047	-0.206839	0.0371366	0.520502	2.66536	1.16953	0.316258	0.639789	0.942391	-0.614609
105	0.796002	0.108868	0.731288	-1.25053	-0.580236	-0.755157	-0.707033	-0.263968	-0.682286	-0.162939	2.23604	-2.20442	-0.266975	0.248899	-2.32733	-0.288532	0.175827	0.225798	-2.18257	-1.83333	-0.0517238	-1.85694	-0.936642	1.60609	0.147096	-0.776742	-0.270528	-1.21115	-0.510858	-0.451943	0.182512	0.05247	-2.48202	-0.0609541	-1.52745	-1.8558	0.461401	-1.38574	-1.97483	-1.31737	0.291854	-2.24164	-0.0685446	-2.9084	-1.047	-1.03675	-0.238958	0.471711	-1.86089
129	2.17101	-0.143647	2.06812	1.53573	1.27132	0.573163	1.31467	1.40135	1.29009	0.530743	1.59691	0.406555	0.735461	-0.430419	-0.754464	1.35079	1.1299	0.0192206	-1.50687	0.305798	0.222572	-0.696225	-0.175778	1.35694	-0.0841277	-0.670082	-0.657412	-0.535676	0.779684	1.08437	0.463079	0.187907	-1.77249	-0.176481	-0.786057	-0.353765	1.33148	0.608163	-0.70857	-0.462236	-0.14246	0.970386	0.539532	-0.143122	0.290581	1.21068	0.729152	0.273623	-0.392548
126	-0.831952	0.20798	-0.970772	0.817669	-0.369295	-0.550492	-0.73033	-0.230284	-0.44885	-1.15243	-0.643352	-0.966253	0.326348	-0.849422	-0.550901	-1.58731	-0.330686	0.0798895	-0.412755	-0.263612	-0.220417	0.897955	0.0694957	-0.0898155	0.308017	-0.116803	-0.995995	0.275984	-0.439401	-0.397627	-0.344923	-1.17396	0.635123	0.227435	0.268293	-0.941535	-0.772503	-0.977764	-2.18226	0.032733	0.0640964	-0.392318	-0.233348	-2.15315	-0.481641	-0.661701	-0.439381	-0.616363	1.0437
130	-0.844632	0.0286108	-0.857903	-1.63724	-0.923432	-1.01469	-1.63368	-0.514924	-0.967464	0.0899504	0.12716	4.63281	1.15078	0.0851707	-1.18023	-1.39047	-2.09565	0.0356947	-0.411997	-0.232921	-0.0736574	-0.59405	-1.56131	-1.30916	-0.00641929	0.0404496	-0.607401	-1.4539	-1.52993	-0.610617	-0.900596	-0.635134	-1.70413	0.163248	0.384328	-0.414713	-0.304116	-1.06064	-0.881505	-0.467996	-0.832187	-1.16161	8.41692	-0.893292	1.74063	-0.701025	0.27611	-0.431556	-1.05853
111	0.816988	0.151729	0.779781	1.11675	0.258799	0.0238805	0.237414	0.234814	0.234248	0.339691	0.315025	-0.100043	1.47329	0.183181	-1.44752	0.0433649	0.590215	0.0393454	1.55786	0.338189	0.210249	-0.904806	-0.687793	-0.345431	0.205284	1.75843	-0.00216314	-0.641899	0.274931	0.596618	0.565441	0.542274	-2.15946	-0.230854	-0.369279	-0.275689	0.530844	0.140613	-0.636795	-0.666267	-0.160856	-0.697753	0.174311	-1.14201	0.343066	0.0688132	0.487066	0.221441	-0.917916
112	2.18644	0.146853	2.00129	0.810479	0.375957	0.245017	0.232968	0.483555	0.300488	0.160961	-0.972026	-0.130026	1.09608	-2.08023	-0.705504	-0.134991	0.662308	0.0961167	1.33218	0.0467182	0.00480574	-0.754888	-0.081026	-0.454407	0.169486	0.122253	-0.0223942	-0.19675	0.0479859	0.484434	1.22909	1.21349	-2.66107	0.697763	0.133193	0.957485	1.34428	1.07362	2.67359	0.0400635	0.214003	0.484222	-1.1909	0.880523	-0.498103	0.00858431	-0.321419	1.38878	-1.13962
113	-0.601844	0.0543008	-0.526517	0.241607	0.0949215	-0.100886	-0.181988	-0.850457	0.129174	-0.407683	-1.54763	1.07943	0.350509	-0.810269	0.179399	-0.208593	-0.154305	-0.0538642	0.0906046	-0.313753	-0.138562	0.362658	0.449448	-0.463452	0.118688	-0.536105	-0.468282	0.222459	-0.0811766	0.165142	0.417984	-0.0629066	0.611464	0.152778	-0.152581	-0.493979	-0.264943	-0.226072	-2.54586	0.136417	0.502716	-0.506582	2.23259	-1.10745	-0.366409	0.00978283	0.206125	0.478153	0.0657831
115	-0.98509	0.142825	-0.93485	1.87531	-0.394907	-0.449873	-0.46995	-0.412819	-0.364716	-0.272418	-0.47817	-1.74455	0.986808	0.169365	-0.670071	0.497018	-0.236145	0.116544	-1.15353	0.119049	0.061318	-0.510266	0.0990922	0.493971	0.0934904	-0.702083	-0.0762298	0.663911	-0.472734	0.224953	-0.843977	-0.545331	-0.831026	0.595174	0.297191	-1.40204	-0.44036	-0.402104	-2.68213	0.174629	-0.0280689	-0.928006	-0.0976597	-3.71615	-0.191284	-0.364383	0.580335	-0.451476	-0.558186
116	1.31306	-0.0212307	1.20673	-1.07817	-0.620471	-0.473164	-0.539183	-0.687821	-0.669697	0.718689	-0.102277	1.71533	2.07155	-1.05231	-0.0905013	-1.59088	-0.670569	-0.210535	-0.842803	-1.11515	-0.320616	0.0092574	-0.233617	-0.697753	-0.0735217	-0.72813	-1.05809	-0.540805	-0.409134	0.688798	-0.165997	0.850461	1.93347	0.718599	-0.554705	-0.81934	0.467033	-0.897272	-0.795654	-0.32727	0.0644715	-0.601066	3.86359	-0.906814	0.379531	-0.351214	-0.514582	-0.550665	-0.560043
117	0.083096	-0.0123496	-0.19096	0.607098	0.347229	-0.144941	0.00307433	0.733194	0.29373	-0.453019	-0.940174	2.70531	0.488977	-0.661973	-1.07343	-0.0652553	-0.624317	0.148213	-0.613347	-0.415491	0.225589	-0.942759	-0.571503	0.214183	-0.0673178	-0.571917	-1.28437	-0.742461	0.0342897	0.767437	0.925142	-0.23721	-1.68076	0.0905409	-0.167462	-1.60169	-0.231813	-0.678184	-0.932117	-0.486587	-0.293226	-1.7076	-0.922754	-3.05431	-0.0666336	-0.00149673	-0.452978	-0.379705	-1.15277
120	0.221285	0.000594165	0.197444	-0.0939699	-0.384407	-0.391904	-0.518852	-0.511456	-0.407081	-0.699975	0.0708296	0.618991	-0.955818	1.68216	-0.493824	-0.180804	-0.77042	-0.00439148	-1.48917	-1.35544	-0.0702305	-1.01489	1.26556	0.116404	0.0325469	-0.250773	0.287604	0.806419	-0.365406	-0.275337	1.29349	-1.26141	0.615263	-0.442956	-0.0564413	-0.487698	0.0589466	-0.259741	-1.46631	0.620964	0.128569	-1.33005	0.105346	-0.559698	-0.720247	-0.478515	-0.647593	-0.0679845	-0.785753
121	-0.821037	0.216985	-0.856053	1.29891	-0.0852178	0.263434	-0.0662085	-0.306032	-0.0809978	0.0473368	-0.0867928	-1.80719	0.653622	2.04739	0.575219	0.559463	0.0996852	0.36798	1.05324	-1.20143	0.305896	-0.812846	1.59187	1.23789	0.32135	0.375475	-0.435285	1.55422	0.0816844	0.136364	-0.393438	-0.321522	1.06272	1.41459	-0.0804881	1.375	-0.338425	1.01089	2.57875	0.661716	1.41484	-0.0316002	2.68869	0.418388	-0.37864	-0.188061	0.0359323	1.41906	-0.692839
122	-1.40847	-0.362289	-1.40584	0.104934	-1.27917	-0.612988	-0.888477	-1.42489	-1.28782	0.124548	-2.01166	-4.65883	1.88768	0.640137	-1.47187	0.294979	0.145389	-0.0678621	-2.15912	-1.01102	-0.07687	-0.326553	-0.749896	-0.905135	-0.644194	-1.43	-1.86373	-0.758274	-0.761359	0.430489	-0.968243	-1.62648	-0.282693	1.64857	-0.417199	0.220297	-0.766412	0.206425	-1.05056	-0.634517	-0.828561	-0.549863	-4.12287	0.563894	-1.73718	-1.28127	0.28421	-0.890104	-1.25297
185	1.03415	0.36241	0.837506	0.706888	0.616955	0.17648	0.4332	-0.0488003	0.596749	-0.0740709	-0.0739013	-2.65197	-1.04513	-0.424595	-0.28074	0.31973	0.521151	-0.134066	1.06262	-0.38643	0.166534	-0.516445	-0.531764	3.39767	0.434352	1.57102	1.14895	-0.357094	0.306687	0.10568	0.0812683	1.68034	-0.619471	0.853063	0.328086	-0.724862	0.803629	-0.295994	-1.7731	-0.182069	0.259286	-0.876337	1.76861	-1.5315	-0.469239	0.440844	1.22126	1.20277	-0.372173
388	-1.27365	-0.395843	-1.0961	1.96339	1.07032	0.505916	1.13335	1.15656	1.07676	-0.30033	-1.08237	-1.6903	0.865698	1.25945	0.726157	0.729151	0.92152	-0.124912	-0.475904	0.727706	-0.055495	0.490325	0.801334	-0.46783	-0.475091	-0.308053	-0.423368	0.652323	0.887755	1.04492	-0.460689	-0.759704	0.529952	0.422309	-0.312842	-0.172046	-0.567663	0.343606	-2.15725	0.201587	0.383972	1.89238	-1.26488	0.0731466	-0.141195	0.706436	-2.48992	0.0441779	0.284224
293	-1.92583	-0.186148	-1.80192	1.07679	-0.618375	-0.530747	-0.738653	-0.215993	-0.639298	0.464121	0.726484	0.217704	0.660687	-0.913743	-1.08804	0.6206	-0.403521	-0.199791	-0.0811086	1.63915	0.0327231	0.498933	-1.37012	0.0262687	-0.247496	-0.876332	-0.629753	-1.20026	-0.547448	1.37907	0.22454	-1.89875	-0.72238	0.313395	-0.0505852	-0.43049	-0.797089	-0.801836	1.81257	-0.784648	0.00689219	-0.964405	0.794284	0.587708	-1.05572	-0.707049	1.5116	0.0513427	-0.543406
45	0.053369	0.178762	0.266367	0.617684	0.0709753	-0.00617421	0.0488344	-0.57363	0.0822938	0.5448	-1.03518	-0.846747	1.022	-0.130814	-0.164362	0.982768	-0.0432936	0.12383	-0.0158457	-1.05298	0.268093	-0.0409842	0.389212	4.39997	0.236725	-1.18594	-1.15483	0.13552	-2.91063e-05	0.136866	-0.0181963	0.209489	-1.02211	0.102932	-1.04076	-0.404819	0.010266	-0.165388	-1.02243	-0.329935	0.581858	-0.338903	0.129636	-1.52991	-0.369732	0.0544499	0.54895	0.497188	0.105151
40	7.26086	0.536772	8.36956	-2.47587	1.8751	1.70743	2.66388	1.11612	1.86699	0.405308	-1.33077	-2.93667	-1.40899	-0.484359	-0.811957	-1.48029	3.6788	-0.123384	0.282548	0.534857	0.123268	1.00402	1.58677	0.940651	0.845004	-1.6703	-0.946708	1.7872	2.02862	2.0815	1.78759	4.18892	-0.703375	0.30675	0.984356	0.0155758	4.52353	0.826508	0.4889	1.18597	0.888822	0.0880581	-0.982509	2.14676	0.940975	1.83901	-0.765843	0.515224	0.851068
41	0.410061	0.22412	0.367915	-0.812487	0.695275	0.338903	0.662845	0.0729133	0.693107	0.57248	0.637164	-0.273876	-0.343732	0.828512	0.728567	0.171895	0.287749	-0.12809	-0.767699	0.211668	-0.059672	0.0381674	0.365984	1.44134	0.522491	0.431167	0.38509	0.336868	0.424976	-0.168921	1.40216	0.0589493	0.460482	-0.337745	-0.400038	0.539223	0.217451	0.31479	-2.78975	-0.00238204	0.903103	0.0737287	0.0804222	-0.335402	-0.0922605	0.578813	0.539045	0.07089	0.308682
42	0.649122	0.273796	0.631	-1.25956	0.297686	-0.138897	0.136336	0.338184	0.26919	-0.624048	1.01851	0.168585	-1.32969	-0.0674174	0.280837	-0.988179	0.621738	0.0138056	0.170485	-0.860388	-0.0732406	0.831534	1.19698	0.587778	0.489801	-0.185544	-0.364392	0.993233	0.114317	-0.366718	0.414985	-0.176645	0.917305	-0.644972	0.960149	-1.29145	0.219593	-0.473915	-2.53581	1.00314	0.755255	-1.83658	-0.161717	-3.01298	0.153423	0.141522	-1.22633	0.230662	-0.0153996
344	2.41814	0.144521	2.26021	-0.350615	-0.29684	-0.378181	-0.742437	-0.0328675	-0.427965	-0.27605	1.39555	4.94775	-0.0819171	1.02717	-0.346803	-0.339657	0.0706599	0.0628791	0.679739	-1.04659	0.117079	-0.38265	0.364185	-0.477082	0.220608	0.400172	-0.764238	0.380263	-0.639763	0.218155	0.762289	3.17505	0.372078	1.09303	0.065863	-0.213623	1.30464	-0.351454	-3.06593	0.315487	0.223314	-0.997664	5.47287	-0.977892	2.51148	0.114356	-0.0395535	-0.0617615	0.107392
46	1.24176	0.17243	1.18383	-0.243943	0.621199	0.19943	0.634851	0.363413	0.467793	0.365548	-0.0637104	-0.178526	-0.0343326	1.33758	-0.342415	0.43079	1.2553	-0.139507	1.74013	-0.937011	-0.315174	-0.557935	0.576647	-0.369194	0.215159	0.819427	-0.17052	0.540052	0.585653	-0.562045	-0.0017308	2.27887	0.369918	-0.0381884	-0.631875	-0.319111	0.678048	-0.442982	-0.482424	-0.0722782	-0.333334	-0.845346	-0.0386554	-1.25741	0.484729	0.380547	-0.0413413	-0.087797	-0.283649
956	0.93273	-0.10998	0.990735	0.705162	0.185003	0.10709	0.312625	0.425948	0.16567	-0.0214837	3.80455	-0.891282	1.45309	-0.331694	-0.828641	0.123686	0.659054	-0.0904391	0.426812	0.466753	-0.26576	-1.33356	-0.0690127	-0.436765	-0.12076	0.437747	0.400585	-0.14572	0.269024	0.648238	-0.241128	1.33188	-1.53984	1.63861	-0.0333972	-1.15879	0.596002	-0.203267	0.750151	-0.161968	0.234104	-0.211605	-1.10322	-0.591654	-0.141325	-0.0639711	-0.174899	0.0635235	-0.701717
408	-0.882524	-0.307666	-0.701971	0.712453	0.199099	0.27265	0.0726302	0.155705	0.256687	0.917944	-0.980233	2.89394	3.25915	-0.107861	0.711577	0.33056	-0.225491	-0.0201686	0.99772	0.368984	-0.0243889	1.01816	0.699379	-1.746	-0.556846	-0.0799921	-0.908954	0.394637	0.0790858	0.415525	0.198449	-1.29332	2.98877	1.48581	0.00969321	0.653836	-0.354307	0.646873	-1.32156	0.468122	0.817467	0.147662	0.917012	0.716553	0.764809	0.406406	0.643152	-0.133553	1.30459
474	0.926005	0.347407	0.927003	0.0748569	0.545071	0.890403	1.04699	0.681033	0.582472	3.16667	-0.28149	0.57376	4.36396	0.315472	0.781611	1.11002	0.731589	-0.0441473	0.333972	-0.642012	-0.0879047	0.455441	0.780422	2.87185	0.845655	0.790302	0.881394	0.222083	0.715999	0.395211	0.266245	-0.188355	1.34371	2.74837	-0.389891	1.83972	0.110851	1.45758	1.17666	0.218674	0.169446	0.00753473	-0.496846	3.81681	0.998792	0.538306	4.33353	-0.143859	0.616183
568	-0.413459	0.0220214	-0.425995	-2.66439	0.0524788	7.63713e-05	0.216336	0.437065	0.0797874	-0.900748	1.36454	-0.936852	-1.53478	2.3795	0.0362273	-0.825007	-0.776405	-0.240233	-1.76656	-0.893867	-0.312973	-0.293422	0.64062	0.710081	-0.0689626	-0.337068	-0.18875	0.396513	0.0888162	-1.72555	0.935044	-0.897332	0.441417	-1.04183	0.463895	-0.163171	-0.506348	0.175457	-0.784497	0.6054	-0.84088	0.759846	-0.841713	0.798029	-0.451317	0.131892	-0.767841	-0.809304	0.247106
561	0.213481	-0.256374	0.172334	0.434839	0.928915	0.661314	0.765392	-0.0606441	0.942932	0.969862	-0.029661	3.99657	0.854346	0.997532	1.83003	1.22509	-0.307186	0.127184	1.59834	1.74289	0.066303	1.36134	1.68995	-0.312025	-0.303077	2.08482	1.28651	2.09455	0.466591	0.372803	-0.848931	-0.295816	3.2563	0.418128	-0.110506	1.05417	0.78777	0.83815	-0.547858	0.81122	0.514994	2.18024	1.77883	0.273257	2.5651	0.687019	0.354667	0.932928	1.50957
566	0.803853	-0.0623431	0.740091	-0.962436	0.781538	0.472736	0.761569	1.15303	0.810073	-1.22043	0.972466	0.698215	-2.98234	0.370774	0.712163	-0.633303	0.581554	-0.0845736	0.979131	-1.87572	-0.313603	-0.214467	1.45671	0.113235	-0.048166	0.722251	-0.000778078	1.54597	0.614588	-0.547897	-0.692924	-0.107971	0.227523	-1.96032	0.228788	0.682416	0.166399	0.604635	-1.3733	0.803806	0.161965	-0.588648	-0.306768	0.312664	0.430594	0.700395	-1.57267	0.0834158	-0.0577304
525	0.209438	0.106114	0.177047	-0.865646	-0.113386	0.153195	0.0798875	0.425754	-0.102109	-0.847367	-0.716935	0.862237	-1.5705	-0.286599	1.11451	-0.72994	-0.172884	-0.0377722	1.24925	-1.32224	0.204211	-0.770512	0.743161	-0.230381	0.131295	0.411141	0.121863	0.568567	0.153356	-0.636686	0.138888	0.329028	1.57455	-1.38038	-0.795214	0.712275	0.0673777	0.185725	2.95542	0.0235995	0.541759	-0.230114	0.433394	3.44847	0.321146	0.0490179	-0.873445	0.913267	-0.32816
414	-0.389229	-0.0834742	-0.387157	1.14703	-0.440901	-0.586754	-0.652302	-0.388001	-0.300707	-0.829268	-0.850255	-1.29712	-1.93202	0.341786	-1.2555	-0.272106	-0.459786	-0.0142536	-0.989579	-0.688586	-0.0416682	-0.259345	-1.33795	-0.317121	-0.1959	-0.459969	-0.333995	-1.30979	-0.38825	0.177885	1.92532	0.238916	-2.00503	-1.86125	0.518752	-1.81321	-0.211929	-1.14616	-0.712339	-0.430187	-1.08206	-1.5571	0.282512	-1.86195	-0.408768	-0.316678	-0.369439	0.213026	-0.669439
483	0.892625	0.330552	0.964848	0.700735	0.212546	0.287537	0.749474	1.45052	0.300857	1.43586	-0.382317	-0.17547	2.14806	0.0158552	-0.316659	1.27543	0.388483	-0.0797354	0.345432	0.112739	0.0187077	-0.629722	0.0587687	1.35521	0.512668	0.694283	0.933065	0.050925	0.438102	0.648254	-0.390406	0.173092	-0.5518	1.34333	-0.33384	0.00740277	0.598285	0.461052	1.19443	-0.135201	0.879684	-0.868937	-0.232608	0.392282	0.238869	0.330221	1.47119	0.434751	0.249181
463	0.50926	0.200347	0.539559	1.83075	-0.748036	-0.123532	-0.366163	-0.05319	-0.685989	-0.874806	1.07349	-0.347246	-0.250054	-0.211087	0.971132	-0.562924	0.165867	0.00492226	0.277652	-1.5674	0.246649	0.173244	0.528446	-0.614743	0.337732	0.141014	0.840571	0.442738	-0.238464	1.20706	0.0444985	-0.492175	0.571969	0.600908	1.35717	0.29075	0.114774	0.149837	3.55745	0.938011	0.503056	0.378577	0.628349	3.75165	-0.167441	-0.574276	-1.58422	0.770876	0.232864
446	0.560667	0.138933	0.69839	-0.00644285	1.06755	0.876992	1.47264	1.37022	1.03727	3.19025	-0.647496	0.52259	4.86508	0.712755	0.348752	1.36688	0.95752	-0.0892818	-0.271906	0.377308	-0.0195619	0.0039319	0.862799	3.38511	0.28708	0.0189714	0.674594	0.233584	1.19278	-0.258303	0.477724	0.750393	1.23915	2.86325	0.108088	0.849702	0.199838	0.652434	0.511816	0.389307	0.010737	0.148227	-0.122644	0.822899	0.503312	0.987302	3.17168	0.666487	0.0609389
475	2.45301	0.129677	2.41974	0.0832843	1.60535	1.09626	1.35417	1.20197	1.32863	0.207533	2.95152	0.672535	-0.352631	-0.723237	2.26999	0.402755	0.898162	-0.00982309	4.94916	1.10074	0.0957764	0.740831	1.85134	0.267576	0.303458	2.25566	-0.815677	2.13417	1.25925	0.472511	-1.54429	1.98582	1.92406	-0.0534071	0.303944	1.58628	1.31129	1.54096	1.60677	1.27123	0.888008	1.06476	-0.6645	2.13658	0.964852	1.12502	0.786067	0.277284	0.442446
514	0.788977	0.607815	0.868193	2.42415	1.1591	0.452011	0.751438	0.855415	1.38123	-0.0666424	1.42717	-2.02925	-0.0808118	-1.66029	-1.31349	1.74718	0.95657	0.484248	-0.953965	0.00869397	0.271308	0.139163	-0.924684	4.82083	0.986819	-0.28026	0.542448	-0.870362	0.759435	1.4673	-2.1246	2.20425	-2.16439	1.49184	0.45984	-0.595552	0.363989	-0.0361456	-2.50095	-0.526684	1.28085	0.165672	2.91368	-2.80482	-0.145617	0.982285	0.897901	1.61315	-0.545668
570	0.492408	0.170062	0.457469	1.04954	-0.995467	-0.337518	-0.562795	-1.07446	-0.968527	-0.442403	0.10642	1.07624	-0.404117	-1.38253	0.848382	0.481844	-0.682909	0.0895074	-1.73549	0.712935	-0.0696929	-0.25927	-0.287225	-1.20528	0.125539	-0.0857037	-0.974116	-0.297611	-0.457796	0.406725	-0.491533	0.0188425	0.33745	-0.304705	0.685308	-0.0452858	0.544758	-0.154008	0.47942	-0.0420745	-0.720565	0.195034	-0.570695	0.657292	-0.194727	-0.167126	-0.445677	-0.944414	-0.126074
427	1.86851	0.419687	2.06783	1.6487	2.06623	1.49922	2.4831	1.64049	2.12441	1.69778	0.486495	-2.39262	1.36647	1.11371	1.24813	2.61355	2.86054	0.384952	0.126795	1.26023	-0.346215	1.24289	1.4957	6.47906	0.766536	0.709568	1.85804	1.90606	1.77536	0.635128	0.755571	1.80803	3.37742	1.30718	0.219309	1.28287	1.18682	1.53195	0.0517147	1.00523	1.46061	1.56224	-1.1726	2.48234	-0.0433232	1.95996	2.53215	1.91912	0.895952
563	-2.16704	-0.139953	-1.9662	-0.0352875	-0.222203	-0.0748326	-0.394463	-0.208724	-0.32154	0.798568	-0.546943	2.14847	1.91779	0.331239	1.86067	0.855542	0.134792	0.218315	0.681113	0.162649	0.182199	0.945789	1.72802	-2.36864	-0.0117549	1.15983	0.630353	1.6241	-0.347311	-0.509706	0.0107785	-1.18338	3.66073	1.84483	0.320117	0.75066	-0.535061	0.0566272	-2.3249	1.25005	0.685551	-0.418244	1.58584	0.679923	0.549651	-0.199201	-0.161896	0.634148	1.17718
432	0.152419	0.260245	0.0948749	1.80232	-0.581625	-0.152502	-0.20315	-0.173415	-0.637742	0.271177	1.89004	1.47972	-0.310593	-2.08276	0.364925	0.699266	0.117432	-0.0840528	0.227187	-0.0866183	-0.0607208	0.485766	-0.575582	0.194102	0.30739	0.849689	-0.629055	-0.449773	-0.0747576	0.884346	0.552357	0.401639	-0.219866	0.120434	0.164452	0.21872	0.0930873	-0.130152	-0.574363	-0.361736	-0.046045	-0.260686	0.754188	-1.50353	-0.00987124	-0.760867	-0.345494	0.23208	-0.685163
436	1.71543	0.143266	1.51438	-0.782882	-0.406657	-0.604024	-0.739307	-0.705566	-0.448943	1.67136	1.58207	-0.861454	0.623965	1.7868	0.0961089	-0.448118	-1.19064	-0.187931	-0.505738	-0.307187	-0.329877	-0.59955	-0.738903	0.0614213	0.0524337	-0.139848	-0.480254	0.0102882	-0.712657	-0.566182	0.396074	-0.363615	-0.665214	1.07058	0.613825	-1.05784	0.983767	-0.605479	-1.38226	-0.0846676	0.4588	-1.26975	0.97806	-3.37375	-0.617519	-0.468365	1.28178	0.282239	-0.337959
572	-0.856761	0.00638682	-0.873101	1.3965	-0.66287	-0.451017	-0.910085	-0.758154	-0.712948	0.0542893	-2.91575	1.2973	1.24629	-1.51727	-0.455257	0.223774	-0.342806	-0.0891289	-0.376176	-1.29114	-0.0774192	0.262813	-1.0494	-2.15399	-0.141457	-0.436667	-0.858557	-0.93972	-0.664742	1.13514	0.207056	-0.15664	-0.88059	-0.205917	0.47976	0.398922	-0.523161	-0.0360707	1.5035	-0.268343	-0.222812	-0.719153	1.33044	1.63195	-0.0485258	-0.443353	0.196819	0.316589	-0.0611488
499	-2.05087	-0.829693	-2.12634	0.942637	-1.41538	-1.12714	-1.37253	-1.37635	-1.42383	0.0997071	-0.629459	-0.604558	2.36851	-0.862354	-1.78824	-0.00452855	-1.03007	-0.267095	-2.05524	-0.701392	-0.229079	0.057896	-2.00275	-1.03308	-0.973815	-1.89699	-0.986451	-1.93312	-1.03795	0.457288	-0.808438	-1.13322	-1.01087	1.63691	0.167056	-1.79446	-1.60339	-1.15158	-0.547932	-0.945348	-0.437345	-1.62574	-2.50051	-2.63142	-1.0008	-1.51268	0.259422	-0.743284	-0.585645
590	4.66056	0.577054	5.13097	-1.0348	-0.464988	0.261834	0.370335	0.386291	-0.533326	0.00268924	2.55631	-0.822439	-1.37196	-1.26791	-0.545871	-1.42953	1.71281	0.205101	0.0555759	2.61468	0.00614123	0.538121	-1.19834	-0.0510062	1.06116	1.18298	-0.356757	-0.58049	0.394869	1.29989	-1.30789	3.17263	-1.60309	-0.167269	1.71689	-0.475505	2.76606	-0.142787	0.867315	0.308634	-0.364971	0.754147	1.29482	1.31691	-0.132434	0.839282	-1.17287	-1.53022	0.606401
591	-0.398508	-0.00238449	-0.439199	0.467149	-0.455523	-0.242645	-0.623791	-0.281972	-0.414605	0.0622873	-0.323845	-0.0145304	0.280139	-1.58314	0.884962	-0.38071	0.240087	-0.227354	1.18523	-0.841133	-0.371458	-0.415408	-0.709928	-0.667188	-0.0245247	-0.0562162	-0.122779	-0.5711	-0.417795	-0.125022	-0.362032	0.425637	-0.887778	-0.0794709	-0.808422	0.805002	-0.368366	0.00404546	4.18055	-0.817483	-0.55141	0.184504	0.178689	3.57267	-0.414884	-0.411981	0.0814083	-0.526253	-0.455725
581	0.190536	-0.130813	0.318872	-0.372213	-0.664065	-0.119116	-0.216787	-0.735451	-0.689659	-0.24975	0.837474	-0.625067	-1.21722	-1.35659	-0.512205	-1.03003	0.43744	-0.1114	-1.28561	1.70162	-0.163674	0.134132	-2.21294	-1.51089	-0.172316	0.0769491	-0.707739	-1.95461	-0.121532	-0.240507	-0.915743	-0.0188056	-2.49088	-1.56761	0.117634	0.04028	0.275906	-0.483364	0.20307	-1.27875	-0.839109	1.61102	-0.030195	0.231812	-0.103311	-0.508237	0.330539	-1.21093	-0.150847
519	-1.2605	0.234142	-1.40601	0.360544	-1.45712	-1.54793	-1.86548	-1.24684	-1.37031	-1.14564	-3.10971	-0.967693	-0.836196	-2.73611	-2.52141	-1.57594	-1.38616	0.126149	-3.05363	-0.694197	0.0446957	-0.796666	-3.3345	-1.65563	0.35338	-1.59859	0.838178	-2.78885	-1.42012	0.19466	0.1238	-0.662939	-4.50923	-1.45247	0.381451	-2.3376	-0.676457	-1.9768	-1.35928	-1.36771	-1.68654	0.156656	-0.426926	-2.88303	-0.657612	-1.45105	-0.3064	-1.76844	-1.36461
459	-0.948885	0.03206	-0.897749	3.09098	0.0199425	0.345128	0.505095	0.276317	0.134849	1.92154	-0.402142	-2.69002	4.6262	0.026337	-0.909049	1.56975	0.488141	-0.0857388	-0.865727	0.326317	0.202261	0.0346781	-0.793405	-0.770075	-0.0263942	0.106375	-0.648235	-0.881449	0.465462	1.18427	0.268187	0.313853	-0.703565	2.23848	-0.338315	-0.282	-0.503614	-0.143457	2.30426	-0.695131	-0.0584	0.962562	-1.80959	0.0733773	-0.471996	-0.311448	0.222649	0.326322	0.160222
468	-1.79266	-0.0421506	-1.84533	-0.419232	-1.68134	-0.841741	-1.28629	-1.09386	-1.65351	1.64775	-0.845733	-1.244	2.10699	-1.01978	-0.878288	0.241547	-0.842132	0.0565862	-1.0502	-0.884489	0.183168	-0.031679	-1.13097	-1.66028	-0.210612	-0.588456	-0.824423	-0.768568	-1.0167	-0.556261	-1.01737	0.904062	-0.992618	1.0527	1.83454	-0.0208309	-0.938239	-0.590662	0.398998	0.627745	-0.592157	-0.589752	-3.1528	-0.355396	-0.875769	-1.40542	1.39873	-0.416165	-0.535606
396	0.0261684	0.1358	-0.0284904	2.53425	-0.115472	0.0969026	0.268678	0.271611	-0.137176	1.17372	1.07899	-1.62141	2.04672	0.0769772	0.480893	0.972034	0.1826	0.0778692	0.75407	0.284777	0.0129565	-0.332288	0.669428	-1.70849	0.198224	0.976717	-1.342	0.896926	0.107758	1.05829	0.315354	0.780487	1.65319	0.492332	0.327464	-0.564576	-0.154244	-0.431332	-0.977157	0.421708	0.73195	0.352028	-0.949345	-0.817538	-0.690841	-0.281775	1.99202	0.41051	0.350197
526	-1.85291	0.322061	-1.97351	1.95885	-0.745208	-0.412792	-0.794282	-0.686805	-0.644938	-0.299442	-1.92714	1.96538	-0.148813	-2.36486	1.13087	0.724105	-0.560297	0.021132	-1.31587	-0.0927669	0.1115	0.703558	-0.690566	-0.559666	0.306544	-0.477346	0.208237	-0.864479	-0.667393	0.556305	0.69084	2.17094	0.191718	0.534505	-0.0638806	0.134271	-1.26901	-0.37575	-0.249297	-0.494203	-0.493605	0.238773	0.355244	-0.18413	-0.543987	-0.864783	-0.0693048	-0.674245	1.08871
533	-2.62013	-0.104821	-2.66734	2.72939	-1.66506	-1.4499	-1.70534	-1.17445	-1.66968	-0.776859	-2.29131	-3.22881	0.461669	-1.15638	-2.28692	0.108065	-0.906998	-0.0619057	-2.17988	-0.354061	-0.222472	-1.68534	-1.60749	-0.421104	-0.157554	-1.33667	-0.479713	-1.68534	-1.32483	0.885825	-1.66244	-2.16748	-2.87725	-0.475937	-0.351254	-2.16395	-1.70746	-1.61104	-0.236695	-1.01972	-0.966558	-1.56819	-0.502043	-2.90965	-1.83767	-1.84282	-1.1799	-0.0728986	-1.16748
485	0.209767	0.129518	0.243744	-0.477833	0.445799	0.21057	0.174676	0.0410115	0.515372	0.563509	0.761334	0.660276	-1.41483	1.44878	1.82829	0.841945	-0.294223	-0.163327	0.0225524	-0.114153	0.0669503	1.03208	0.773372	3.61924	0.19354	0.88644	0.337445	0.689211	0.0290093	-0.170293	0.653176	-1.13828	2.89507	-0.304901	0.624263	0.832491	0.0557221	0.517885	1.03807	0.659364	0.772503	0.174248	2.48085	2.389	0.237107	0.574746	0.162558	0.278374	1.60674
503	-0.116419	0.467229	-0.167437	1.88178	0.358314	-0.137673	0.0480127	0.294237	0.457695	0.424604	1.8901	-0.756254	0.107314	-1.61348	-0.317785	1.06768	-0.279346	-0.0228929	0.986339	0.605879	-0.169395	-0.458373	-0.717481	2.96281	0.81621	0.207908	-1.21196	-0.530675	0.113209	0.625669	-0.251227	-0.0437214	-1.55416	-0.493709	-0.560589	-0.690859	-0.339163	-0.455221	-2.01167	-0.625343	-0.134403	-0.741881	-0.204708	-1.95103	-0.0992641	0.380375	-0.670082	0.213724	-0.264399
609	0.574093	0.00373544	0.421316	1.44243	-0.81139	-0.55985	-0.848752	-0.449524	-0.780385	1.15483	-0.136046	0.458317	2.33812	-1.35976	-1.075	0.989404	-0.672767	0.0182056	-1.05416	-0.204977	-0.0259942	-0.345752	-2.98787	0.8478	-0.100354	0.0861959	-0.981252	-2.50492	-0.719935	0.828138	0.124137	0.00397075	-2.68034	2.3979	-0.758589	-0.146904	0.00714161	-0.793988	1.32305	-1.82573	-1.9322	-0.379253	0.571704	-0.946019	-0.912927	-0.621821	0.318283	-1.34235	-0.110555
395	-1.00966	0.0183545	-0.660789	-1.56778	1.03829	0.858841	1.23975	1.25491	1.06346	-0.298686	-0.392114	-0.227133	-0.755134	-1.49795	0.137463	0.372458	0.593594	-0.210614	0.94823	1.95622	-0.308171	0.285396	-0.769208	1.22783	0.115504	0.306309	-0.346247	-0.598498	0.749651	-0.820406	0.416695	-0.388229	-0.64463	-0.803431	-0.133851	1.40733	-0.26532	0.609599	0.18061	-0.506977	-0.333699	1.57046	0.100565	1.70356	0.453841	0.834452	-0.0189216	-1.025	0.815153
493	-1.89148	-0.165197	-1.87188	-0.667239	-0.291903	-0.44999	-0.543653	0.0709747	-0.354614	-1.28399	-2.3214	-1.24131	-1.7677	-1.68335	-0.0280731	-0.410565	-0.569969	0.0378575	-1.85492	-0.600927	-0.0820135	0.179898	-0.122079	-1.17038	-0.27744	-1.24686	-0.363659	-0.289711	-0.360126	-0.6571	0.53875	-2.24036	-0.565739	-0.264678	-0.113544	-0.975965	-1.47405	-1.1611	-0.600319	-0.214124	-0.544105	-0.223427	0.0523338	-1.69031	-0.615512	-0.614866	-0.0996434	-0.350062	-0.526669
418	0.110981	0.303072	0.0634227	1.92111	-1.09638	-1.19835	-1.48754	-0.525588	-1.10546	-1.08174	0.666816	1.71995	-0.143369	0.0359836	0.54464	-0.495755	-0.571156	0.188198	1.88081	0.0874543	-0.0568963	-1.7707	-0.532662	-0.390848	0.403735	0.734777	-0.078727	-0.339455	-1.21609	1.8881	-0.527197	-1.09946	0.651534	-0.856467	-1.01899	-1.77001	-0.177492	-1.46733	1.01995	-0.950169	0.337136	-1.24394	3.80655	-1.64606	0.320174	-1.13948	0.402321	0.334458	-1.41157
435	-0.433751	-0.105385	-0.482943	2.23975	-0.68081	0.079527	-0.504183	-0.118826	-0.653285	0.145955	-1.54796	-1.36594	0.562242	-0.531437	0.725578	0.306648	0.222354	-0.0182625	1.16054	0.939719	0.137041	1.53781	-0.743813	0.406724	-0.341611	0.749816	-0.1508	-0.706932	-0.388443	0.986951	-0.834099	-0.972356	-0.225069	-0.548894	1.77902	0.777586	-0.270685	0.443912	1.5678	0.548787	0.590799	1.29261	-0.622135	4.19799	-0.431833	-0.730296	0.282814	0.412574	0.758402
569	-0.764446	0.247164	-0.625991	0.42834	-0.225502	-0.552692	-0.852873	-0.471977	-0.219721	-0.724234	1.26675	-2.33705	-0.978966	-0.949319	-1.59085	-0.77136	-0.403114	-0.0792881	-0.593141	-0.787337	-0.332916	-1.01692	-1.14471	-1.41955	0.329465	-1.05608	-0.487416	-1.29556	-0.479215	-0.443673	0.929329	0.113872	-2.35467	-0.396678	-0.630354	-0.359803	-0.670731	-0.366658	-1.48776	-1.02778	-0.544829	-1.84417	-1.22746	-0.0738521	-1.28159	-0.507634	-0.185299	0.0461894	-0.755622
454	-2.3218	-0.410467	-2.20243	0.675038	-0.291729	-0.480908	-0.573115	-0.313513	-0.207771	0.630547	-0.340879	-0.640127	2.41683	-0.590517	-0.0514633	0.219487	-0.162659	0.0689898	-1.26829	0.158566	0.0032813	-0.232071	0.95084	-1.69318	-0.568791	-0.614066	-1.62323	0.695271	-0.432471	0.502061	-1.18042	-0.64932	0.525418	1.31091	-0.591486	-0.605855	-1.2818	-0.47307	-0.755725	0.127358	0.0391544	0.502722	-0.00090705	-1.96171	0.11893	-0.359298	1.26249	0.460197	0.0967711
527	-0.604573	-0.143086	-0.597834	-0.993881	-0.268238	-0.113584	-0.162051	-0.128021	-0.196463	-0.223089	-0.651694	-0.918971	-0.648061	0.579897	-0.465926	-0.191701	-0.283306	-0.246723	-0.254451	0.118916	-0.15902	-0.682644	-1.22645	3.36962	-0.429478	-0.00373656	0.685814	-1.06261	-0.0773059	-0.962186	-0.0458711	0.544226	-1.27708	-0.334914	-0.420172	0.264815	-0.379043	0.103891	2.17593	-0.846063	-0.833543	-0.071554	1.27276	2.16633	-1.02693	-0.495762	0.297172	-0.288248	-0.766832
469	-0.578466	0.124185	-0.691956	0.626205	-0.340779	0.138335	-0.0596643	-0.282003	-0.289036	0.569858	0.537332	-0.586461	0.818277	0.851325	-0.45993	0.275796	-0.124708	-0.0713426	1.13523	-0.593308	-0.0291849	-0.00467111	-1.07873	2.22143	0.3276	1.53752	-0.227583	-0.936697	-0.00405706	0.509112	-1.89335	-0.170364	-1.39483	0.964401	0.0606019	0.788322	-0.217762	0.419875	3.04951	-0.380499	0.162334	0.751968	2.90294	2.55592	-0.560685	-0.319605	0.0168987	0.623821	-0.740465
608	-0.356664	-0.122863	-0.409561	1.38999	-1.18672	-0.767149	-0.859895	-1.16269	-1.13539	-0.0300658	0.459117	-2.33203	1.34958	-1.30567	-1.02214	0.518685	-0.212277	0.101734	-2.36246	-0.601043	0.0683276	-0.238654	-0.956806	-1.59165	-0.321794	-0.941075	-0.624515	-0.932196	-0.719787	0.721986	-0.817998	-1.42227	-2.17658	-0.167204	-0.146119	-1.10732	-0.327348	-0.639915	-1.3024	-0.425051	-0.783638	-0.9245	-3.58971	-1.71827	-1.34999	-1.13358	0.277254	0.140129	-0.537021
600	-2.01999	-0.551558	-1.93959	-0.734137	-1.44084	-1.02547	-1.13551	-1.04068	-1.47752	1.03656	0.0862975	-2.06156	1.66685	-0.462902	-1.49167	0.378244	-0.411946	0.0955691	-1.34888	1.12056	-0.049386	0.0792087	-2.16965	-1.32254	-0.632075	-1.50281	0.404521	-1.82737	-0.939522	-0.071026	-0.839685	-1.84762	-0.905077	0.139232	0.393438	-1.08488	-1.22124	-1.313	0.895754	-0.850899	-0.959157	-1.38723	-0.66835	-2.34552	-1.81661	-1.49554	1.70758	-1.14445	-0.888375
529	-0.539866	-0.321491	-0.553573	0.885704	0.0400617	-0.175484	-0.41602	-0.407001	0.0272516	0.433018	-0.151903	0.24511	2.41456	0.00846012	-0.0599333	0.536569	-0.0577137	0.262702	0.961846	-0.202832	0.0500681	0.192589	0.0471586	-0.976694	-0.457858	-0.111307	0.349713	-0.223091	-0.211082	0.0205443	0.448388	0.0100823	1.07448	0.968421	0.43033	0.435974	-0.289799	0.309674	-2.01085	0.256495	-0.255032	-0.550458	0.907939	0.33874	0.288843	0.0137819	0.0238068	0.000812195	-0.301489
512	1.60673	0.646645	1.62497	1.13912	0.919488	0.421621	0.89187	0.560572	0.879326	1.6698	0.959611	0.303698	2.96256	1.15061	1.88607	0.850578	1.40195	-1.39892	0.644486	0.909251	1.84751	1.64353	0.754274	0.507015	1.16003	2.05034	1.3602	1.36637	0.531839	0.637489	0.913671	1.11549	1.60284	2.91823	2.02906	0.372618	1.07602	0.296118	-0.318225	1.37713	1.12643	-0.377912	-0.379795	1.64767	0.204213	0.834334	1.2682	1.29398	2.17083
398	-1.70618	0.219436	-1.58759	0.82365	-0.0565984	0.523612	0.116558	0.190467	-0.107724	0.80741	-1.13622	0.746861	0.193154	0.177427	0.576579	0.142165	-0.454933	0.115417	0.141247	0.854894	0.0486261	0.993671	-1.07931	1.32506	0.244729	0.67985	0.0952449	-0.945863	0.116973	0.167639	0.463913	-1.33529	0.748887	-0.340758	1.2231	1.6761	-0.642434	0.629492	2.77485	0.257488	0.230919	1.38168	-0.0892361	1.90436	-0.210754	-0.0818946	1.59496	0.883972	0.429412
497	-1.37253	-0.379596	-1.21568	0.650429	-1.75554	-1.25801	-1.52471	-1.9072	-1.71099	-0.661161	-0.147486	-2.98144	-0.0264903	-0.468225	-2.15445	-0.178512	-0.615621	-0.133607	-2.41664	-1.92532	-0.136952	-0.98452	-1.54468	-0.56438	-0.439114	-1.62224	-1.2531	-1.79927	-1.27009	-0.0804311	-1.17391	-1.08674	-3.46878	-1.4259	-0.80062	-1.42605	-1.02557	-1.09749	-0.785597	-1.40482	-0.900957	-1.36554	-1.76496	-2.43632	-1.2157	-1.61667	-1.08235	-0.209289	-1.57665
462	-2.82219	-0.323178	-2.81621	1.0851	-1.69474	-1.57024	-2.16427	-1.37238	-1.63421	-1.01931	-1.05595	1.37106	-0.472449	-1.01009	-1.75015	-0.400237	-2.15069	0.0653774	-2.42402	-0.566519	0.280703	-0.243394	-2.04715	-0.366161	-0.376941	-1.43139	-0.858842	-1.85178	-1.86239	0.850262	-0.182825	-0.846211	-3.5755	-0.806833	-0.451155	-1.43928	-1.20122	-1.57291	-2.51746	-1.29705	-1.41988	-1.38361	-0.0831075	-2.50147	-0.171174	-1.47623	-1.39044	-0.867659	-0.270626
567	-1.93379	-0.419218	-1.93341	-1.49994	-0.764923	-0.329599	-0.814842	-0.710297	-0.658194	-0.736103	-0.498981	0.721519	0.0094378	-1.96029	-1.60313	-0.275075	-0.946747	-0.199556	-1.63021	1.66819	-0.317984	-0.489626	-1.56884	-1.97574	-0.573182	-1.04726	-0.379447	-1.56291	-0.646569	-1.33605	-0.317646	-0.454149	-2.45085	-0.371539	0.436144	0.470915	-1.0429	-0.0140117	3.18543	-0.421358	-1.12374	0.686978	1.8056	1.73154	-0.844798	-0.593536	-0.697544	-0.61707	-1.12657
564	-2.83657	-0.687971	-2.72597	0.300637	-1.06402	-0.603343	-1.01931	-0.77732	-1.01547	-1.199	-1.83645	-0.411153	-2.63691	-1.33294	-1.653	-0.523883	-1.4778	0.177738	-2.73561	0.410663	-0.148814	-0.810246	-3.54016	0.309931	-0.854755	-1.69148	-0.702878	-3.04267	-0.728648	0.0640093	0.491347	-2.01296	-3.17077	-1.94606	0.0691935	-0.00881598	-1.64783	-0.163943	1.95128	-1.30177	-2.01453	0.433064	0.580937	-0.650742	-0.245407	-1.02781	-1.99111	-2.21946	-0.72216
573	-1.52329	-0.215085	-1.52445	-0.0607132	0.376928	0.266212	0.217078	-0.150384	0.397842	-0.154962	0.178862	-2.457	-1.39921	-1.56403	0.376218	0.501127	0.39577	-0.0318891	0.62142	0.166689	-0.0229251	0.103974	0.763479	-1.66001	-0.221473	-0.450781	0.431031	0.434815	0.172143	-0.0881832	-1.42087	-0.777169	0.519125	0.0395485	0.982356	1.03257	-0.918229	1.08225	2.21894	0.843057	0.320108	-0.307161	-2.25899	-0.0749509	-1.02292	-0.0418472	-0.15817	0.936314	-0.0172947
562	-1.96013	-0.379632	-1.8511	0.227468	-0.966415	-0.845207	-1.16238	-0.797635	-0.943614	0.228653	-0.936863	0.448063	1.26515	-2.13465	-1.75745	-0.0605678	-0.705406	0.0631631	-0.93621	-0.54714	0.105217	-0.573425	-1.099	-1.43933	-0.491784	-1.46676	-0.380184	-1.15842	-0.938267	-1.00778	-0.0908127	-0.406416	-3.22867	0.845896	0.46813	-0.902327	-1.41498	-0.520003	0.296703	-0.38076	-0.955123	-1.24189	-0.342161	-0.734653	-1.04692	-1.0587	-1.07611	-0.110347	-0.200446
448	-0.374394	-0.316338	-0.436957	2.16179	-0.263027	-0.294715	-0.312003	0.060618	-0.216951	-0.60674	0.60313	0.450148	0.836625	0.176372	0.83213	0.852239	-0.321135	-0.177523	-0.695039	0.736365	0.552047	0.961179	0.255872	-1.56431	-0.405536	-0.639655	-1.07755	0.295789	-0.314101	1.10651	0.0664531	-1.46697	1.24532	1.20766	-0.16733	-0.115826	-0.0735738	-0.0365793	-0.0772885	-0.0444145	0.893959	0.791098	0.137382	0.500885	-0.372681	-0.376744	0.576965	0.392873	1.3363
557	0.0506342	-0.124697	0.117801	2.32449	0.117256	-0.394958	-0.343409	-0.792337	0.215282	-0.0983363	-0.201268	-1.32813	0.207509	-1.50128	-0.595733	0.564458	-0.229358	-0.0233239	0.663116	-0.472917	-0.0264169	0.410187	-0.37113	-1.64639	-0.126533	0.361351	-0.713903	-0.111944	-0.216716	1.58338	-0.367151	1.75656	-0.0790546	0.611281	0.584568	-1.27634	-0.143895	-0.499785	-1.56103	0.0878834	0.166212	-0.710974	-0.425227	-2.26544	0.783537	0.182034	1.01625	0.745682	0.204325
450	-0.644019	0.445813	-0.443293	0.439492	1.57615	0.828527	1.20822	1.02997	1.46575	-0.413704	-0.41588	0.775037	-1.15451	-0.916379	0.855161	-0.0211915	1.25109	-0.0283703	3.26629	0.215861	-0.0741475	1.10332	1.08244	-0.656226	0.59905	1.61585	-0.561192	1.68016	0.946839	0.0576964	-0.68828	1.15918	0.0931024	-1.0026	-0.46403	1.2805	-0.434392	1.23312	-0.252443	0.391444	-0.512926	0.303974	-0.466799	1.97213	0.327433	1.26906	-0.233296	-0.61578	0.636829
515	-1.36407	-0.0344239	-1.3552	-0.865089	-1.01725	-0.503761	-0.845878	-0.403586	-1.05639	-1.35511	-0.766877	0.358243	-2.30279	-1.57082	0.752829	-0.71768	-1.49794	-0.0166999	-1.67201	-0.753908	-0.0393637	-0.542519	-0.22584	-1.98705	-0.0169856	-0.900901	-1.0908	-0.628176	-0.566184	-0.595682	-0.0761102	-1.78772	-1.03221	-0.649457	-0.751601	-0.113096	-0.609848	-0.567855	-1.58076	-0.523007	-0.732461	0.051069	0.528489	-0.0388081	-0.421486	-0.902226	-0.432116	-0.966274	-0.219554
597	-1.62593	0.0541804	-1.67291	2.94491	-0.6184	-0.338523	-0.255277	-0.191814	-0.624598	1.67844	-2.36136	-0.80552	2.76366	-0.860624	-0.804757	2.1684	-0.657365	-0.113431	-1.96922	-0.139392	0.0582751	-0.357131	-1.35215	-1.12015	0.0360363	-0.957676	-0.35696	-1.32089	-0.228768	0.779908	0.161741	-0.245497	-1.80009	1.24101	0.470199	-0.960746	-0.991975	-0.544374	0.595285	-0.660547	-0.819956	-0.0667063	-2.18613	-1.566	-0.305052	-0.639125	0.526307	0.102126	-0.404915
362	0.391792	0.122737	0.450209	-0.388511	-0.121613	0.284403	0.186771	-0.290285	-0.105636	0.525232	0.0171184	0.175377	-0.486693	0.587449	0.709876	0.600839	0.984273	0.152013	0.463655	0.582788	0.178932	1.14821	-0.191626	3.8439	0.396822	1.04976	-0.573746	-0.620322	0.222584	-0.252205	-0.427934	0.153828	0.653019	-0.413645	0.13747	0.939918	0.300318	0.334972	-0.620599	0.0599309	-0.317815	0.447201	0.358249	0.501887	-0.0600048	-0.0778386	1.55729	-0.129446	0.520635
630	-2.10998	0.216376	-2.14506	1.30976	-1.05498	-1.03588	-1.53816	-0.884144	-1.00113	-0.392951	-0.893971	-1.3739	0.546383	0.0572047	0.154588	0.125139	-0.781355	-0.00893155	-2.08057	0.179815	-0.121879	0.140487	-1.91834	0.228564	0.0800335	-1.08741	0.293777	-1.64305	-1.23	0.677111	0.0829962	-1.66963	0.335967	0.445104	0.0825024	-0.97453	-0.70042	-0.613879	-0.463193	-0.982631	1.50187	-0.110412	0.770534	-2.04177	-0.810275	-0.940036	-0.421631	0.473575	0.676299
349	-0.563906	0.0753799	-0.770583	0.900834	-0.351126	-0.175027	-0.186523	-0.318913	-0.287317	0.620171	0.883791	0.390159	0.500081	-0.798155	-0.584019	0.323006	-0.0837371	-0.00563161	-0.396256	-0.313054	-0.04967	-0.289809	-1.18836	-0.116006	0.13086	-0.256807	0.26514	-1.2604	-0.110347	-0.137045	-0.822524	0.836791	-1.30636	-0.634628	-0.770907	-0.508102	-0.544401	-0.331079	-0.5598	-1.18676	-0.513742	-0.123244	-0.00308116	-0.296295	-0.385637	-0.420791	0.67489	-0.742927	0.133803
330	-1.84027	-0.541658	-1.72051	0.697714	-1.43456	-0.901217	-1.32316	-1.30954	-1.3737	0.191637	-2.35671	1.39952	2.61636	-0.892734	-0.390659	-0.356543	-0.786961	0.00945287	-0.375309	-0.856777	-0.171785	-0.720344	0.0790271	-1.91427	-0.70617	-1.06387	-1.68419	-0.313093	-1.00557	0.250749	-0.12885	-2.01003	0.661765	0.98934	-0.605273	-1.16776	-1.2762	-1.17664	0.440938	-0.243368	-0.420298	-0.0638106	0.142782	-1.90952	-0.483586	-1.08579	0.341348	-0.29428	-0.936011
363	1.81556	0.210673	1.65641	-1.33575	-0.130918	0.186656	0.0260831	-0.651811	-0.0784561	-0.702963	-0.158402	-0.479915	0.132848	-0.237041	0.558866	-1.23358	0.844004	0.072551	-0.448555	-0.808235	-0.0359996	0.211714	0.607089	0.747742	0.19869	-0.0571139	1.15916	0.00677523	0.0668082	-0.954237	0.788194	3.15673	1.35173	-0.544147	-0.835907	1.13079	0.887942	0.124443	2.53448	-0.0757245	0.757569	-0.491753	0.284122	4.11869	0.0310023	-0.0833371	-0.330671	0.557089	0.712999
50	-0.411162	-0.252886	-0.288849	-2.54476	0.770732	0.322679	0.400319	0.59592	0.730588	0.000604869	0.684777	0.0148165	-0.770187	-0.0906502	0.469707	-0.0196414	0.941104	-0.228863	0.710872	-0.639768	-0.0678168	-0.360638	0.766876	0.314074	-0.378366	0.00627124	-0.958089	0.482321	0.215781	-1.34425	0.60284	1.5291	1.59933	-0.276889	-0.316637	0.811525	-0.312567	0.476915	-2.05248	0.316023	-0.704587	-1.09889	-0.105239	-0.552614	-0.410744	0.478087	0.326781	-0.25943	-0.29067
48	-0.722422	-0.212979	-0.671843	-0.590292	0.957514	0.302661	0.832884	0.556704	0.983791	-0.527943	-0.524869	-3.384	-0.52442	1.22763	-2.17376	-0.49729	0.0748826	-0.210072	0.547116	-0.219557	-0.157342	-2.04285	-0.523779	-0.483584	-0.233414	1.32299	-0.389339	-0.244574	0.825795	-0.348521	-0.343345	-0.419135	-2.31315	-1.16243	-1.02242	-0.963556	-0.172147	-0.281558	-1.65651	-0.956933	-1.81734	-0.966557	-1.87063	-2.06924	-0.679537	0.566955	-0.0850774	-1.53897	-1.22231
49	2.13138	0.255782	1.97073	-0.887019	0.619785	0.0842144	0.205383	0.106687	0.51811	-0.763619	0.785758	2.23414	-0.772577	1.10846	-0.182067	-1.08657	0.0624174	-0.122575	2.53506	-0.145203	-0.359482	-0.426872	0.0649843	0.377378	0.420485	1.38097	-0.909371	0.390714	0.214549	-0.709679	0.149426	1.7489	-0.862227	-0.62975	-0.430148	-0.304115	1.40338	0.0988044	-1.19915	-0.12367	-0.492339	-0.681895	-0.55236	-0.432957	0.93108	0.544131	-0.285442	-0.823449	-0.0566043
51	1.8644	0.20384	1.79547	-1.13411	1.38889	0.748547	1.27212	1.23956	1.322	0.000538813	0.465613	3.50268	-1.00107	-0.75547	1.75329	0.531097	0.288445	-0.0932885	4.22618	1.33519	0.455242	0.0588928	1.22641	1.11117	0.582718	2.20575	0.912782	1.45114	1.01248	-0.0819254	0.492601	1.80948	-0.185093	0.0794002	-0.361527	0.411992	1.03284	0.430325	0.535117	0.390607	1.49409	0.338662	-0.037184	-0.321391	1.08633	1.15417	0.182182	0.650205	1.03407
57	1.16918	-0.0319807	1.4116	-0.0832691	-0.481108	-0.172563	-0.184217	-0.423424	-0.518162	-0.529403	-0.311217	-2.19222	0.18148	-0.279205	0.238552	-0.0200486	0.861731	0.0615565	0.337012	-0.275727	-0.076175	-0.626284	0.77822	0.972022	-0.066605	0.431343	-0.370349	0.788901	-0.0450785	0.44579	-0.228727	0.193175	0.323603	0.283387	-0.102537	-0.57529	0.401796	-0.137288	-2.01008	0.476805	-0.472373	0.450832	-0.725782	-1.13048	-0.130505	-0.529077	-0.484444	-0.643714	-0.732293
58	1.42773	-0.0243419	1.43465	-0.82087	0.956218	0.829684	1.33266	0.355786	0.978345	-0.258407	-0.437265	-3.44187	-0.719286	1.86067	0.580049	-0.173701	1.58286	-0.124277	1.75791	-0.113691	-0.297991	-0.383903	0.970992	-1.55753	0.0702787	0.713074	-0.656738	0.968943	0.996814	-1.00011	0.896244	-1.22105	0.954863	-0.662575	-1.01176	0.552729	0.375523	0.731328	-2.0199	0.136578	0.012483	0.231152	-2.14071	0.538174	0.0677758	0.950722	0.11607	0.269835	0.224373
66	2.11181	0.143167	2.09599	-0.205896	0.510853	0.175383	0.647296	0.0888193	0.446909	-0.0263364	-0.801281	0.0261515	-0.576869	0.38682	1.07673	-0.335284	1.36426	0.0237305	0.895002	-0.390028	-0.200998	0.176364	1.65812	0.481855	0.390508	-0.160709	0.435272	1.41998	0.462651	0.195412	-1.68711	2.38037	2.12043	-0.0120822	-0.188115	-0.450986	0.9361	0.0441862	-2.23813	0.777485	0.319892	0.374794	-1.24736	-1.24626	0.0237599	0.389512	-0.0725446	0.810546	0.472112
65	0.520932	0.222011	0.550216	-1.18103	1.02202	0.944624	1.14276	0.350468	1.07992	0.18792	1.20269	2.56965	-0.782829	0.0946542	0.534001	0.130518	0.559971	0.211792	-1.03902	-0.376458	0.0701015	0.988872	0.885601	-0.405751	0.240522	-0.299366	-0.40656	0.818002	0.870865	-0.306547	0.881585	0.485797	1.47795	0.262782	0.391433	1.75024	0.228705	1.47868	-1.6423	0.52637	0.335634	0.0972234	1.12496	1.39045	1.30905	1.05299	0.388897	0.545999	0.628081
60	1.89078	-0.199578	2.2802	-0.121857	-0.195034	-0.120328	-0.0802129	-1.04473	-0.258912	0.69198	-0.193107	-1.6207	1.80977	1.50648	-0.263277	-0.239688	0.964748	-0.0124294	-1.02729	-1.03201	0.0451491	0.298669	1.35045	-0.910446	-0.315744	-1.23737	0.531809	1.21873	-0.0293282	0.307282	-0.168436	0.884704	0.853941	0.848597	0.440693	-0.54955	1.33338	-0.110587	1.97159	0.965052	0.158227	-1.47993	-1.3221	-1.56432	0.00440798	-0.0128102	0.590815	0.218699	-0.0432673
53	0.292052	-0.382722	0.167803	-0.162373	-0.0873622	-0.178967	-0.291403	-1.10188	0.00175744	-0.346634	-1.58987	-0.354486	-0.384049	1.86003	0.294289	-1.00753	-0.326683	0.081417	-1.41145	-0.918828	-0.092809	0.040291	0.602226	-1.31689	-0.534395	-0.664325	-0.15801	0.837386	-0.157656	-0.515213	1.58447	1.25089	1.8726	-1.27487	0.642871	-0.821818	0.0366651	-0.549909	-2.23371	0.544752	-0.814142	0.383011	-0.981123	-1.91133	0.479613	0.0787343	0.119228	-0.523235	0.205459
59	0.411255	-0.33162	0.262671	-2.32749	0.448693	0.0511632	0.26502	0.0296976	0.429266	-1.5792	0.527652	1.15633	-2.29077	2.17265	-1.3668	-0.758238	-0.434089	-0.14972	-1.05675	-2.40767	-0.238814	0.362168	-0.564995	1.91072	-0.561047	-1.33299	-0.633967	-0.19809	0.239783	-0.936455	0.0861962	0.207484	0.598944	-0.941638	0.0156444	-0.96162	0.307658	-0.614605	-2.50484	-0.333115	-0.226826	0.0402358	0.827152	-2.75399	0.431627	0.652891	-0.728698	-0.858984	0.371382
63	1.54118	0.140395	1.37827	-1.44635	0.491844	0.563964	0.928904	-0.10707	0.441513	-0.861463	-0.619862	-0.45913	-1.62981	0.406229	1.20273	-0.686113	1.2498	0.0623811	2.71144	0.189134	0.0756983	0.258401	1.51003	-0.584051	0.22076	-0.552392	-0.701859	1.14119	0.649654	0.0568236	0.778748	-0.532412	0.917928	-1.05512	-0.282664	0.539911	0.831713	0.67968	1.17373	0.741264	0.765658	-0.365388	-1.15367	-0.764873	0.178775	0.688878	-1.02787	0.935005	0.61271
54	-0.14028	0.107533	-0.138445	-2.95194	1.59352	0.961012	1.44956	0.611985	1.71783	-1.47783	0.449648	-1.62848	-2.89121	-0.60304	0.137516	-0.977813	0.348905	-0.152415	2.06489	0.786814	-0.00632051	-0.214793	1.38187	1.24186	0.173874	1.51431	-0.0232933	1.41492	1.1517	-1.2106	-0.752252	-0.570175	0.142822	-1.70819	-0.0943843	0.887792	-0.489762	0.820396	2.5277	0.737627	0.0332689	1.08495	-0.616942	1.47005	0.328506	1.28473	-1.38674	0.328544	0.191308
56	-1.14927	0.293548	-0.928023	0.00166407	-0.479799	-0.481624	-0.84699	-0.907767	-0.40874	-1.01839	0.484143	3.53887	-2.34289	0.521513	0.167302	0.0207121	-1.97185	-0.0267937	-1.12152	0.286187	0.412533	0.0796181	0.657438	-0.580968	0.322186	-0.163822	0.377703	0.189763	-0.714409	-0.0738571	-0.0152047	-0.756015	-0.205758	-1.87391	0.532072	0.238295	-0.731184	-0.207409	-2.01248	0.460142	-0.110613	-0.738346	0.779439	-0.0985043	0.346423	-0.344865	-0.501668	0.419331	0.452383
64	-0.337426	0.150981	-0.2452	-1.40299	-0.256051	-0.385625	-0.258836	0.385778	-0.139079	-0.087306	-0.395764	-1.00547	-0.655879	0.548575	-1.49358	-0.268793	-0.384123	-0.174232	-1.01946	-0.381459	-0.115252	-0.811261	-0.660418	-0.145576	0.194484	0.460942	-0.659594	-0.40382	-0.227135	-0.415627	0.0868194	1.83356	-1.62758	-0.269927	-0.572607	-1.4895	-0.250588	-0.652001	-1.42921	-0.633822	-1.10463	-1.42046	0.455547	-2.28961	-0.493927	-0.145625	0.414132	-0.860791	-0.81266
61	0.910183	0.340213	0.729746	-0.916879	0.156961	-0.0155143	0.0663082	-0.446294	0.187581	0.0102152	-0.125285	-2.21136	-1.03597	1.38702	0.0254234	-0.214368	0.158526	0.179167	-1.73776	-0.813296	0.150361	1.29893	1.06158	1.62057	0.219788	-0.971349	0.757552	0.682305	0.0694902	-0.341402	0.703167	1.46716	0.753443	-0.399074	2.01732	0.095438	0.970313	0.0697958	-1.73571	1.41322	1.47024	-0.346288	-0.194421	-1.15016	-0.598572	-0.0426676	0.163145	1.50364	0.345662
124	-0.131168	-0.220779	-0.240036	-1.723	0.102434	-0.639421	-0.651089	0.33806	0.063369	-1.17323	-1.73793	-0.318708	-0.660002	-1.04606	-1.45488	-1.18751	-0.497807	-0.0238847	-0.350751	-1.81185	-0.455713	-1.74086	-0.0377901	-0.118005	-0.318554	-0.481076	-2.12312	-0.12261	-0.48564	-1.01551	-0.379659	-1.24733	-1.66867	-1.40547	-0.733081	-1.28443	-0.359979	-1.35218	1.50228	-0.245456	-0.54017	-1.487	0.0999111	-1.46637	-0.651858	-0.15587	-0.493495	-0.814821	-1.28086
329	-0.147846	0.0616435	-0.183663	-0.238176	0.287449	0.234941	0.223045	0.391923	0.206054	0.0582366	-0.625847	-0.528543	-0.987297	0.783908	0.02448	0.116493	-0.00226213	-0.095897	2.41272	-0.0213587	0.00433808	-0.809133	0.469781	0.314553	0.0418473	1.56903	1.62605	0.297258	0.218262	0.486266	-0.246722	0.0591169	-1.92809	-0.307158	-0.759779	0.689263	-0.0776109	0.454085	1.88557	-0.127348	-0.513402	0.281037	0.514829	0.903504	-0.211035	0.124887	0.690395	-0.392766	-0.310395
937	-0.960647	0.0909806	-1.06143	0.213709	0.334898	-0.243254	-0.437418	0.340231	0.283671	0.0136893	0.250552	5.25979	-1.10802	-0.158578	0.629294	0.565871	-0.839535	-0.0461736	0.947585	0.611303	-0.27244	-0.0280561	0.617297	-0.337341	0.157568	0.446372	-0.77674	0.666565	-0.432493	0.0593152	1.61743	-0.829224	1.3095	-0.492369	-0.307113	0.148207	-0.688285	-0.198268	-0.966957	0.109904	0.429999	-0.719584	2.21419	-1.65421	1.84716	0.0134459	-0.567287	0.0262982	0.57546
891	-1.93163	-0.0518119	-1.71576	0.783662	0.125271	-0.0426702	-0.067026	-0.0960079	0.148516	-0.175834	-1.15787	-1.02791	-0.563509	1.47821	0.125473	0.492412	0.30336	0.0807522	0.0642973	-0.19553	0.166718	0.802801	0.6214	-0.933679	-0.139875	-0.656256	-0.369876	0.61387	0.0299188	-0.510101	-0.551322	-1.11861	-0.0233979	-0.350296	1.03102	-0.133653	-0.840864	-0.141725	-1.5668	0.803161	-0.449096	-0.891819	-1.86358	-1.19602	-0.314592	-0.0285263	-0.806974	0.103753	0.20915
835	-2.41079	0.270179	-2.25136	-0.125539	1.19188	0.297794	0.623823	0.933189	1.17468	0.528359	-0.872689	0.801893	-0.0464478	2.34843	-0.343335	0.423473	-0.0626588	0.184038	-0.66771	0.517919	-0.0730237	-0.154425	1.37106	0.454028	0.346696	-0.0835603	0.472079	1.58947	0.534703	-0.213761	0.723939	-1.22622	0.374903	0.107777	-0.071133	0.0396742	-0.725805	0.323132	-1.30669	0.619498	-0.157805	0.252023	-0.590979	-0.410961	0.673141	0.917313	-0.307883	0.741811	0.631041
688	-0.716659	-0.119464	-0.365692	-0.00437044	1.4922	0.800165	1.3958	1.74701	1.44231	-0.701901	-0.121518	1.27346	-0.58215	0.164527	0.668662	-0.122227	-0.358398	-0.183604	0.7818	0.800993	-0.187384	-0.506487	0.364693	-0.639889	-0.117606	-0.068854	-0.400889	0.822593	0.875587	-0.334603	0.673199	-0.735041	0.78494	-0.184645	-0.226381	0.745135	-0.509658	0.823074	2.16064	0.105745	-0.827051	0.234583	-0.457724	1.69809	1.03162	1.12088	-0.174554	-0.905097	0.197194
771	-2.09923	-0.501252	-2.00658	1.72977	0.0184259	0.0409768	-0.0919251	0.345435	0.0326512	1.09313	-1.00676	2.18487	2.11674	1.17306	-0.288418	1.42914	-0.316028	0.187599	-0.398899	1.13426	0.346873	0.367877	-1.20917	0.770098	-0.529944	0.0640351	0.926967	-1.17727	-0.152255	-0.502867	0.807942	-0.116298	2.0362	1.41268	0.447782	0.725137	-1.19344	0.225809	0.682393	-0.512357	0.000873704	1.01254	-1.87314	1.3739	0.580078	-0.122872	0.704848	-0.468205	0.842126
833	-0.47006	-0.0125565	-0.419346	3.2719	-0.20386	-0.231839	-0.303772	-0.597389	-0.165827	1.48124	-1.18069	-0.595175	2.8069	1.10403	0.0347635	1.15111	0.895856	0.0238077	0.0919792	-0.117284	0.367315	0.6775	0.479659	-0.91318	-0.0961788	0.0370834	0.810953	0.144654	-0.23272	1.28238	0.813506	-1.28547	1.88898	1.29439	0.302754	-0.325038	-0.117275	-0.078024	-0.734482	0.420165	0.447027	-1.01581	-1.82857	-1.46156	-0.854243	-0.205615	1.46018	1.11376	0.424581
740	-1.07782	-0.198934	-0.878336	0.646355	0.24119	0.508225	0.198529	0.875598	0.193247	0.580217	0.30193	-1.76805	1.2029	1.13037	0.804059	1.01311	-0.166056	0.0399985	0.373679	0.479507	0.361111	0.4419	-0.034683	0.750451	-0.346837	0.0467423	0.925453	-0.206061	0.387633	-0.191034	0.481768	-0.605657	1.10347	0.281443	0.129888	1.29948	-0.447419	0.425026	3.81489	-0.0516537	-0.305957	0.00156476	-0.42466	3.09348	0.0942216	0.232938	1.44331	-0.0869658	0.336398
779	1.96514	0.195626	1.63952	0.185845	1.48594	0.946124	1.56316	1.74131	1.50965	0.330905	-0.244157	0.582399	-1.54184	0.966167	1.61293	0.827313	0.813247	0.0986116	1.81993	0.990909	0.135512	0.130384	0.849304	1.47105	0.279239	0.435297	1.05013	1.8176	1.07021	0.238178	-0.312206	0.817862	1.16158	-0.224311	0.0449177	0.799262	1.18607	0.785593	-0.24534	0.524177	0.614321	0.806067	0.225149	1.16824	0.655151	1.34285	0.87948	0.494945	0.786716
898	-0.00993361	0.155254	-0.0689402	1.03275	0.365864	0.274934	0.331861	0.227263	0.239364	0.431361	0.377976	-1.95337	0.0121299	0.0135176	0.315522	0.919508	0.0620718	0.339988	-1.86842	0.161811	0.304881	0.0783814	0.590942	0.142184	0.115208	-1.03525	0.72332	-0.106368	0.43012	0.598187	1.29259	-1.35838	0.114905	-0.0420019	1.10085	-0.685289	-0.112362	-0.0800751	-1.00384	0.81687	0.152497	1.17036	0.245603	-0.916498	-0.226144	0.0606803	0.6173	0.630723	-0.150267
860	-0.885832	0.125312	-0.856572	-0.292473	0.452409	-0.125507	-0.287844	0.383919	0.423515	-1.02859	-0.449835	3.36003	-1.95296	-0.679576	0.156059	-0.726095	-1.26199	-0.131411	0.279371	-0.32504	-0.0198147	-0.298364	0.20473	0.370017	0.403587	0.172004	0.0524558	0.545805	-0.296195	0.111504	0.445385	0.0389494	-0.0459612	-2.00667	-0.241022	-0.141532	-0.561068	0.110327	-0.0662196	0.0435246	0.418619	-0.359087	7.76927	-0.581157	1.19628	0.378895	-0.335754	0.381832	-0.251804
733	0.312115	-0.102266	0.293349	0.114906	-1.43386	-0.974138	-0.970676	-1.27327	-1.40009	-0.852259	0.16804	-2.67549	-0.117107	0.281305	-1.2871	-0.464623	-0.160097	-0.0464215	-2.24219	-1.18863	0.158494	-1.0375	-0.500547	-0.612941	-0.172619	-1.34546	0.191786	-0.910986	-0.726416	0.0145519	1.13847	0.600623	-2.03371	-0.838181	-0.642508	-1.95905	-0.128281	-1.67147	-2.32952	-0.620494	-0.554797	-0.872765	3.35207	-1.67939	-1.60079	-1.27174	-1.13225	0.410997	-0.554228
803	0.346531	-0.154434	0.220773	-1.3219	-0.895913	-0.649535	-0.918093	-1.01647	-0.82665	-0.196118	-0.420927	0.599412	-1.31643	0.681025	-0.100665	-0.943225	-0.451969	0.0944932	-1.47483	-1.15914	-0.131285	-0.055312	-0.125269	-0.56142	-0.175213	-0.663446	-0.15476	-0.200742	-0.650162	-0.563951	1.26879	-0.183873	-0.355025	-1.06525	-0.708051	-0.466575	0.0671405	-0.705908	-2.05047	-0.484986	-0.86345	-0.310353	0.666707	-0.694481	-0.0882092	-0.747232	0.255064	-0.68201	0.338887
823	-1.85319	-0.0241625	-1.89714	-0.0889184	-0.823766	-0.631735	-0.85923	-0.568593	-0.792616	0.0152885	-1.11873	0.473702	-0.0929902	-0.62548	-1.06308	-0.119064	-1.36782	0.114502	0.155094	0.759229	0.0739388	-0.294796	-1.62888	-0.506196	-0.00491904	0.311559	-0.713141	-1.2384	-0.743251	-0.176364	1.16838	-2.30712	-1.65067	-0.677948	0.324425	-0.319852	-1.18807	-0.717699	-0.102441	-0.719349	-1.3373	-0.763179	0.574593	-0.383302	-0.587027	-0.988565	-0.0776057	-0.849302	-0.369038
829	2.46554	-0.109853	2.34489	-0.0423947	1.12122	0.821777	1.67046	1.12929	1.04717	0.749379	-1.30262	0.79772	-0.155426	0.950138	1.11937	0.311242	0.745277	-0.0528674	1.96284	1.01602	0.0509948	0.519893	0.626206	-0.905609	-0.190573	1.33454	0.514174	0.691882	1.04001	-0.298893	-0.00492736	1.02629	1.56047	-0.328798	0.0956509	0.3817	1.2421	0.949044	-2.10221	0.334421	0.15516	1.14377	-1.08815	0.727565	1.30743	1.07325	0.873302	-0.632097	0.370874
738	1.30886	0.345452	1.4448	0.144027	0.765537	0.468358	0.431227	0.522327	0.668079	1.03143	-0.581412	0.327476	2.29744	0.54945	-0.767594	0.735281	-0.022458	0.347541	-1.31349	0.706196	0.223052	-0.411554	-1.89135	0.921045	0.432778	-0.601176	0.619326	-1.28325	0.610633	0.497506	0.114195	-0.0685668	-1.49107	1.61252	-0.632841	-0.635053	0.989339	-0.160789	-3.12111	-0.969642	-0.155521	-0.743104	1.67637	-1.97585	0.367755	0.50508	0.491189	-0.0134967	-0.238716
783	0.777255	0.366284	0.632791	0.366431	0.772253	0.60473	0.707577	0.513704	0.857433	0.0486007	-1.19789	-0.0904845	1.16244	-0.815453	1.02773	0.486289	0.0847989	0.222105	0.293904	0.864875	-0.0359134	1.01024	0.391746	-0.386939	0.518812	-0.231681	0.300894	0.695517	0.512694	0.107978	-0.502394	1.67704	1.23029	0.440999	0.1263	1.16257	0.710426	1.14128	3.56415	0.153908	1.6587	1.34205	3.30216	1.96879	0.0870931	0.453463	-0.964084	1.49869	0.557467
900	-0.805542	0.216208	-0.757975	-2.44367	0.0566215	-0.0925174	-0.0014662	-0.148543	0.00610974	0.766871	-0.873488	-2.71864	-0.302339	0.761675	0.30932	-1.34651	-0.792287	-0.01634	0.22051	0.118127	0.123168	0.209228	0.56618	1.69321	0.345937	0.940989	1.885	0.779531	-0.0538768	-1.34925	0.851899	-0.822394	0.157733	-0.163687	0.219732	0.124041	-0.309811	0.0667313	1.07832	0.2803	0.984585	0.104012	2.78524	-0.00367379	-0.134371	0.0091714	1.5177	1.1293	-0.0722875
730	-1.44389	-0.290226	-1.27889	-0.511246	-0.462112	-0.405951	-0.448127	0.236178	-0.436235	-0.312437	-1.33273	-1.05053	-0.332021	-0.169888	0.214626	-0.679619	-0.027056	-0.108618	-0.30069	-0.0643198	-0.210198	-0.411354	-0.907998	-0.75458	-0.4081	-0.361737	0.833396	-0.631439	-0.33646	-0.242548	0.0617889	-1.66034	0.39733	-0.01753	-0.679786	-0.894819	-0.779149	-0.836664	0.632753	-0.825467	-1.06036	-0.182559	-1.47271	-1.05593	-0.569473	-0.76879	-0.88137	-1.23805	0.0226435
906	1.26696	0.168158	1.23354	-1.69003	0.115807	0.111649	0.246295	-0.126868	0.066732	1.00092	-0.330165	-1.17939	0.68432	-1.86745	0.708501	-0.111562	0.677811	0.170157	0.400256	0.567638	0.159722	0.711986	0.601615	-1.42971	0.221933	0.875502	-1.65316	0.509176	0.252864	-1.24197	-0.337805	2.0355	1.00898	1.22652	-0.246876	0.27002	0.586321	0.550874	0.555157	0.172521	-0.0465609	0.255681	0.017154	0.505019	0.400995	0.078763	-0.105986	0.113076	0.942457
908	-0.323579	-0.162898	-0.329075	-0.0173967	-0.372547	0.274052	-0.0734858	-0.344006	-0.678153	-0.463955	0.464041	1.05652	-1.68329	1.64977	0.716636	0.605494	-0.328729	0.0706027	0.284288	1.12841	0.214513	0.83885	1.27365	-0.402506	-0.252277	-0.0919049	-0.596425	1.38693	-0.175607	-0.0632736	-0.560614	-0.414848	2.28936	-0.443675	0.402134	1.16112	-0.119329	0.507944	1.97586	0.909415	-0.0124745	0.480613	0.762401	-0.253319	0.532113	-0.496685	0.0877236	-0.361495	0.367981
859	-1.29076	-0.237634	-1.16139	-0.183745	-0.0562568	-0.0169177	0.114418	-0.167488	0.0116442	-0.0347765	-0.0316851	-2.53009	-0.139175	2.01473	0.079837	-0.184241	-0.248447	-0.124972	0.534084	-0.979982	-0.389503	0.368737	0.249376	-0.751116	-0.353458	0.192373	0.241947	0.33163	0.0734547	-0.322965	-1.09793	-1.86857	1.26566	0.537589	-0.364223	0.356706	-0.385446	0.26776	0.0885358	-0.0199176	0.134498	0.52588	-1.68838	-0.637718	-0.915469	-0.0885814	0.250081	-0.205657	0.655147
796	2.41792	-0.106423	2.53065	-0.632481	1.145	0.429053	0.657317	0.321614	1.02523	0.500538	-1.49929	-0.864967	-0.152109	1.70064	1.96316	0.483476	0.752252	0.211414	3.13985	-0.0642436	0.128653	1.12095	2.14181	-0.654787	-0.214206	3.19969	0.396735	2.64214	0.591031	0.264935	-0.920106	1.98244	1.13067	1.34166	0.934352	-0.0556444	1.99187	-0.0647704	-1.6139	1.63452	0.542441	0.0972104	0.521821	-0.838595	0.305592	0.778104	1.03933	0.372101	0.773008
858	-0.755551	-0.307914	-0.690911	-0.0593394	0.788475	0.713604	0.959346	0.840791	0.750061	0.163073	-0.201993	-0.177166	-1.11055	0.998803	1.79019	0.552801	-0.264145	-0.313603	4.02677	2.11716	-0.122255	1.05432	1.4643	-0.740789	-0.392461	1.64604	1.1294	1.3843	0.56788	-0.0696928	-0.174702	-0.757604	2.6278	-0.260227	0.0188094	1.77512	-0.0223262	1.44617	1.76083	0.789342	0.228219	1.29412	-1.73294	3.21009	-0.330824	0.781726	0.355919	0.00218448	1.15836
828	1.37967	-0.156298	1.26663	0.0806352	0.155673	0.0640233	0.190954	-0.0998792	0.179457	-0.269785	1.73442	0.229032	-0.200467	1.95783	-0.00606115	0.196209	-0.0625027	-0.0421844	-1.04984	-0.295274	0.0627987	-0.310574	0.633898	1.03026	-0.162759	-1.18123	1.66015	0.19879	0.0801978	0.838847	0.722516	0.484666	0.30413	0.522047	-0.30821	0.202898	1.02769	-0.0732735	1.6604	0.149368	-0.241428	0.113741	-0.68187	1.47689	-0.188305	0.238175	-0.420878	0.0401292	0.266519
821	1.98963	-0.00948478	1.51135	-1.55355	1.36395	0.839118	1.37245	1.69209	1.2923	-0.19996	-0.105981	0.760771	-2.94372	3.40657	0.837837	0.304812	-0.501032	0.0583861	0.54056	1.55498	0.142546	-0.195007	0.83348	2.85951	-0.0846605	1.42453	1.64943	1.1282	0.94329	-0.62172	-0.15933	1.05755	1.05951	-1.03432	0.42587	0.761063	1.25323	0.93794	1.74441	0.694259	-0.294811	0.832678	-0.75026	2.81833	0.486537	0.958148	0.299387	-0.48989	0.397628
746	0.0911799	0.0920458	-0.10843	-0.00904223	0.107782	0.212134	0.634879	0.365736	0.112799	-0.131105	0.927884	-2.90394	0.278369	0.258469	-0.579917	0.235813	0.617669	-0.23843	-0.854471	-0.479126	0.0825719	-0.455479	-0.224045	1.09963	0.130723	0.534558	-0.283923	0.0571275	0.79597	0.083535	-2.6052	0.815705	-0.956031	0.959898	-0.142127	-0.630999	-0.901188	0.0620351	-1.16193	-0.302821	-0.676674	-0.454958	-5.677	-0.992678	-1.94909	-0.138855	-0.723951	-0.193649	-0.293547
714	0.606899	0.0795978	0.638131	0.744736	1.00805	0.641338	1.15676	1.17437	0.991803	1.01968	0.7675	0.363897	1.60065	0.100718	0.646324	0.606567	0.765695	-0.0414831	1.22118	0.442962	0.0702484	0.889599	-0.85549	-0.315205	0.099502	-0.275983	0.691169	-0.509652	0.737323	0.30152	1.31647	0.860514	0.245057	0.871768	-0.13395	0.846325	0.369078	0.852165	-2.17346	-0.327484	0.763756	0.603616	-0.349325	1.59963	-0.109766	0.851693	1.06975	0.198444	1.06905
682	-1.16906	-0.141257	-1.15313	-0.301957	-0.337394	-0.478271	-0.80772	0.310945	-0.411513	0.474739	-2.18212	3.28289	-0.0668535	0.659953	-0.149202	-0.0238445	-1.72061	0.0153682	-1.24064	-0.137323	0.0697535	-0.598336	-0.671125	-0.22095	-0.342261	-0.306657	0.733894	-0.48577	-0.670917	-0.364941	-0.697839	-1.16093	-0.0898272	-0.141695	-0.340987	-0.171334	-0.610284	-0.252319	-0.380795	-0.438251	0.347011	-0.432103	1.942	0.392569	1.14641	-0.248817	1.21766	-0.327129	0.0817786
693	-0.957192	0.0207813	-0.922734	-0.719602	-1.06553	-0.42667	-1.0802	-1.67367	-1.16214	-0.122321	-0.750892	0.130238	-0.420437	0.128455	0.973702	-0.690157	-0.898674	-0.0451399	-0.0224975	-0.192485	0.387623	0.717683	1.23716	-0.746253	-0.106184	-0.498716	-0.757336	0.899977	-0.855994	-0.132938	-0.674793	-0.152726	2.11594	-0.0226379	0.668383	0.573904	-0.389011	-0.118701	-0.383959	0.933598	0.345335	-0.369286	-0.575894	-0.325637	-0.615187	-1.16295	0.500509	0.405103	0.126543
677	0.890663	0.0996905	0.964141	-0.327821	0.919443	0.599763	0.848209	1.30603	0.950303	0.611323	0.172062	2.82702	-0.797857	-0.244372	1.2387	0.297158	0.404636	0.167031	0.568005	1.64547	0.00711081	1.29384	-1.10073	0.797237	0.132751	0.582226	0.281258	-0.536905	0.63518	-0.454952	1.30487	0.807046	-0.0482998	-0.46204	0.969973	0.73801	0.411927	0.890528	-1.72609	0.103412	0.788091	1.77074	2.30194	1.2278	1.45922	0.780665	0.972158	-0.0674512	1.01498
722	2.32207	-0.00964392	1.94877	0.0696137	-0.163448	0.431136	0.37061	0.646155	-0.126927	1.21266	-0.177554	1.18736	2.12974	-0.134568	0.396856	0.858282	0.254319	0.0962054	0.387455	0.340799	0.359869	0.0435379	-0.0956914	0.223796	-0.0269845	-0.433494	0.440935	0.136903	0.321405	0.386318	0.867236	1.79605	0.542425	1.23773	-0.164747	1.2019	1.57088	0.591003	3.62862	-0.264684	0.00306938	0.414844	-0.379039	3.32693	0.308373	-0.201343	1.5266	0.00194932	0.148713
846	2.37314	0.00977786	2.34787	-0.103857	-0.281809	-0.00638529	-0.0496622	0.524115	-0.214752	0.801425	0.818757	3.70781	1.4769	0.130836	0.471366	0.52514	-0.0478741	-0.0602434	-0.294344	-0.57444	-0.0492838	0.11944	0.427119	0.0161909	0.0706157	0.78568	0.540657	0.201726	-0.0552188	-0.348318	0.77224	1.25875	2.11411	0.458931	0.857924	0.240047	1.58831	0.202324	0.426203	0.488119	0.115824	0.103601	-0.918479	1.15943	1.20079	-0.0297602	1.52881	0.591138	0.213553
841	-0.637256	0.0732196	-0.5748	0.147225	-0.70733	0.18143	-0.347024	0.00948019	-0.657739	-0.151203	-0.326358	-1.63939	-0.539392	-1.70178	1.25357	0.373562	-0.336221	-0.115957	0.113137	0.70394	0.000754614	0.391228	0.600555	0.683624	0.0213824	-0.0319057	0.439577	0.512458	-0.303381	0.116208	1.63977	0.310071	2.10213	0.206128	0.215579	1.31777	0.168295	0.621055	1.85168	0.438517	0.110486	1.10465	0.0759561	2.44423	-0.53866	-0.549228	-0.497052	0.128881	0.40308
731	-0.130916	0.037606	-0.242973	-0.897786	0.406832	0.328494	0.384995	0.927912	0.35292	-1.08575	-0.654786	-1.92486	-1.23819	-2.0716	0.38148	-0.520977	0.591127	0.109058	2.43221	0.886846	0.0819355	0.116862	-0.0910336	-0.443524	-0.000475258	0.821174	-0.84468	-0.150732	0.165067	-0.421342	-0.497662	-0.739316	-0.263272	0.00386317	0.0113773	0.962566	-0.256381	0.229208	2.1193	-0.110027	-0.206825	0.800713	-0.819726	3.75319	-0.329662	0.102763	-0.955578	-0.0899854	0.297064
772	2.13253	-0.168804	2.05708	0.549575	0.300136	0.248306	0.470061	0.308595	0.297326	-0.721535	1.26226	0.607021	-1.32257	-0.632137	0.0400985	-0.177956	0.744814	-0.0288554	1.23366	0.416561	0.051868	1.30809	0.331674	0.203006	-0.407637	-0.379565	1.5888	0.0799094	0.32549	0.809609	0.575803	2.19044	1.05835	-0.195189	1.02807	0.155234	1.11564	0.626976	1.81467	0.735129	0.223588	0.0321819	0.0242301	1.36146	0.415556	0.302709	-1.35361	0.75266	0.170487
742	1.63467	0.173748	1.56891	-1.04556	0.796039	0.0334316	0.39465	0.317941	0.731731	-0.605552	0.308181	1.00885	-1.2238	-0.562249	0.599629	-0.633151	0.433395	0.106898	0.822667	-0.475749	-0.167963	0.904821	0.171753	0.238055	0.0974866	1.03324	-0.261555	-0.0201932	0.317637	-0.013167	-0.837308	0.700593	-0.764859	-0.510376	0.695309	-1.0025	1.03009	-0.432245	-2.80712	0.256799	0.531164	-0.442448	0.412773	-0.788609	0.0675154	0.543328	-0.612887	0.174085	0.758155
685	0.0103577	0.0181122	0.0362617	-2.05842	0.320101	0.527176	0.453943	0.101826	0.223532	-0.175168	0.124092	0.25571	-1.81106	0.057696	1.34937	-0.994685	0.57722	-0.0025637	2.54615	0.225065	-0.0759427	0.17198	1.27069	-0.488706	-0.0603301	0.748323	0.13601	1.49621	0.364934	-0.744342	-0.940919	-0.242755	1.17024	-0.61702	-0.130699	1.36439	-0.0244297	0.165174	2.69158	0.401484	0.441415	0.956445	-1.24932	2.21246	0.318237	0.141155	-0.672813	0.52601	0.0574365
664	-1.20439	-0.300914	-1.21211	-0.996358	0.56746	0.00532266	0.0987357	0.540413	0.59294	-0.49439	-1.48452	-0.546586	-1.01102	1.03109	-0.372699	-0.674668	-0.759111	0.0779564	0.263274	1.08353	-0.210788	-0.384298	-0.0304956	-0.265911	-0.474132	-0.186911	0.905815	-0.197258	0.101348	-0.608085	-0.94499	-0.164436	-0.507247	-1.59128	-1.09224	0.100403	-0.749087	0.213619	0.132364	-0.559627	-0.924126	-0.225278	-0.43748	-0.0270287	0.600311	0.456289	-0.362952	-1.09869	0.522957
907	-0.112088	0.0320212	-0.0273129	-1.52473	-0.16259	-0.127098	0.00322901	-0.101126	-0.139871	0.52649	-0.720785	-1.23975	0.53194	0.461225	-0.0427521	-0.201036	-0.55081	0.140025	-0.916299	0.270122	0.141586	-0.126296	0.950857	-0.520442	0.0087773	0.312692	0.00590933	0.67098	-0.0704017	-0.69037	-1.20541	-0.017983	0.2146	-0.0613054	0.0943656	-0.544842	-0.253704	-0.405153	1.20862	0.50075	-0.280748	0.359574	-0.972053	-1.31312	-0.200266	-0.137901	1.41116	-0.0843551	0.414571
651	-1.30763	0.139338	-1.42817	-0.199888	-0.0676909	-0.575176	-0.805506	0.425981	-0.04849	0.108583	-0.963269	1.73543	-0.784971	0.628796	0.532834	-0.143325	-1.8178	0.147334	1.58241	1.30441	0.102172	-0.0225728	-0.080373	-0.51814	0.0314338	1.62189	0.728423	-0.159948	-0.681321	-0.735007	0.159859	-0.885245	-0.159638	-0.134614	-0.404985	-1.00061	-0.894137	-0.919757	0.0107545	-0.162601	-0.172849	-0.447349	1.73328	-0.652295	0.330659	-0.275185	0.550709	0.287279	0.749017
638	4.09333	0.29028	4.30097	-0.872429	0.36711	0.759885	0.909676	0.321011	0.309998	-0.208694	1.88433	1.10502	-1.54215	3.2482	2.25382	0.333334	1.40795	0.032646	1.3229	-0.183549	0.0703895	1.22926	2.00103	0.52505	0.40753	0.572906	2.00185	1.7928	0.761511	0.320887	-0.256369	5.43783	4.88057	-0.548227	0.265081	1.61087	2.58627	0.636401	0.81491	1.2232	1.5942	1.27039	0.178043	2.53384	0.614053	2.8564	-0.549446	0.863351	1.11684
687	-0.219766	0.133827	-0.186471	-1.60853	1.38174	1.20384	1.16115	1.2596	1.33394	0.170193	0.533636	3.35049	-1.21766	0.0485827	1.62603	0.259935	-0.0603891	0.144548	1.37295	0.724766	0.11089	0.930828	0.885157	0.35933	0.0610654	0.705189	0.0451142	0.891125	0.89896	-0.749466	-0.859604	0.652899	2.38312	-0.53914	1.45361	2.27004	-0.18519	0.849732	1.55122	1.06655	0.753322	1.26187	2.15093	2.82801	1.46057	1.13812	0.363304	0.564546	0.657083
656	-2.15575	-0.0455795	-2.15923	-0.0530361	-0.562347	-0.352458	-0.806894	-0.500538	-0.573066	0.0294265	-0.258929	-0.288233	1.02348	-0.0843798	1.18875	-0.178528	-0.651997	0.103888	0.458421	0.0248964	-0.061563	-0.247959	-0.300309	-0.208867	-0.10785	0.110287	-0.112345	-0.34552	-0.554676	0.178512	-1.94652	-0.939442	0.998253	0.548597	-1.034	0.468774	-0.968588	-0.198112	-0.410468	-0.590819	0.0926554	1.16752	-0.639789	1.25343	-0.39551	-0.609721	0.132694	0.0409946	0.708835
647	-0.0915907	-0.0323305	-0.0354657	-0.215982	0.678139	0.760646	0.740173	1.03853	0.67769	1.69405	-1.54954	0.217296	1.19707	0.158787	0.482573	0.112272	-0.079896	-0.143329	1.50681	1.01792	0.0926543	0.849725	0.394785	-0.292277	-0.0309441	1.00839	1.13401	0.420887	0.539448	0.0834706	0.961179	0.295942	1.41986	-0.318962	1.10598	1.46095	0.062933	0.836081	2.1196	0.738873	0.309184	0.844544	-0.688948	3.94408	0.233764	0.494131	2.34938	-0.367444	0.752238
782	-2.13354	-0.380838	-2.14726	0.18169	-0.964299	-0.648839	-1.11357	-0.49355	-1.02896	-0.762399	-0.972243	0.00623413	-0.438827	0.322894	-0.31067	-1.03491	-1.42265	-0.0281557	0.20741	-0.0540345	0.0120229	0.183391	-1.14839	0.338778	-0.513229	0.697054	0.427548	-1.0845	-0.899776	0.0951721	0.160834	-0.970031	-1.26514	-0.66728	-0.770514	0.215373	-1.21017	-0.210101	1.84473	-1.06403	-0.761923	-0.0693873	-0.144826	1.06505	-0.508822	-1.1668	-0.629497	-0.738323	0.215761
702	3.26408	-0.194264	3.31462	-0.403051	0.627249	0.573904	1.19946	0.673412	0.627251	0.564162	0.627411	-0.0487858	0.177691	2.66653	-0.0403638	0.801998	0.900867	0.0399416	-0.404049	-0.667712	0.152359	0.398518	1.2612	0.0840535	-0.282413	-0.856745	0.808309	0.957007	0.965076	0.432819	-0.112888	2.48287	0.0965212	1.108	0.84744	-0.767756	2.5099	0.116825	-1.06706	0.898838	-0.122862	-0.549819	0.0240441	-2.97791	0.699632	0.893284	0.283912	0.629954	-0.704095
734	1.09656	0.128723	1.13932	0.188845	0.466423	0.362035	0.718576	0.285645	0.449841	-0.119237	0.930718	-3.42302	-1.78773	0.292936	-0.773087	-0.389564	0.473796	0.0354799	-0.935671	0.847907	-0.293352	0.269105	-1.93685	0.695335	0.210532	0.336084	-0.621864	-1.5069	0.665063	-0.00176558	-0.342279	-0.0336123	-2.55558	-1.32029	0.203841	-0.566015	0.357059	0.25307	0.731777	-0.733258	-1.00615	0.45517	-3.01404	-0.275456	-1.20323	0.0946117	-0.198488	-0.224995	-0.0122612
893	-0.773948	-0.0283883	-0.708557	-0.413303	-0.905557	-0.506792	-0.657121	-0.059539	-0.835005	0.0067297	-0.696933	0.770963	-0.320754	-0.622543	0.0933752	-0.415378	-0.292168	-0.0802164	-1.92912	-0.322495	0.245257	0.385772	0.0120809	-0.551334	-0.00456515	-0.32089	0.692822	-0.0737013	-0.586495	-0.721944	-0.457956	-1.0723	0.645091	-0.160696	0.45139	-0.352635	-0.529158	-0.128989	-2.53538	0.145017	-0.234885	0.5187	-0.0194759	-0.365152	-0.687098	-0.780337	0.343031	-0.177903	0.586144
786	2.40391	0.0162876	2.24205	-0.390591	-1.05087	0.366939	-0.165703	-0.691188	-1.04005	0.491906	2.31593	-0.0279846	-1.81512	0.553189	-0.757947	1.21457	0.639403	0.046391	-0.352232	-0.36587	-0.00122336	0.584325	-0.83653	1.21521	0.0356929	0.318569	-1.1127	-0.843359	-0.195696	-0.34628	0.342516	-0.317827	-0.528195	0.0746832	0.381201	1.46587	1.52111	0.729948	-0.318524	-0.216842	-0.0961699	0.342747	0.541251	2.33184	-0.516762	-0.3776	-0.157672	0.185678	-0.646767
705	-0.142624	-0.0328996	-0.243121	-0.0422864	0.474418	0.20179	0.532097	0.548911	0.418756	-0.166237	-2.5866	-1.88989	-0.0597578	0.535109	-1.04993	-0.346736	0.168564	-0.147007	0.0558681	0.288103	-0.0421908	-1.15901	-0.271333	-0.0785749	-0.151932	0.0284424	-0.595078	-0.128673	0.442985	0.181032	-0.792962	-0.941233	-1.15244	-0.665108	-0.60689	-1.16369	-0.24954	-0.301162	-1.69311	-0.429743	-0.745003	-0.335736	-0.813352	-1.90802	0.138656	0.217991	0.12428	-0.902561	-0.499982
865	1.70371	-0.208026	1.74653	-0.195807	0.435301	0.227651	0.60525	-0.0838414	0.476975	-0.676569	0.709554	-3.18369	-1.23083	1.05167	0.558177	-0.698071	0.674172	-0.139638	-0.470548	0.165368	-0.173844	0.169991	0.695135	0.393075	-0.36351	1.09483	1.20527	0.731695	0.575633	0.148271	-0.0867159	0.620468	1.1936	-0.239054	-0.656014	-1.11817	0.935944	-0.124118	-3.01425	0.220854	0.188314	-0.0111776	-3.44814	-1.37926	-1.57848	0.331041	-1.15731	0.129569	0.0914833
911	0.178869	-0.00597092	0.220239	-0.611799	0.493001	0.0131252	0.416455	0.188087	0.449833	-0.0541699	-1.66059	0.270965	-1.64062	-0.212781	-0.633171	0.134601	0.0404886	-0.0179795	-1.55324	0.62521	0.11885	0.623802	-0.291105	1.27325	-0.0566412	-0.0264313	0.684122	-0.312852	0.406447	-0.389785	-0.0899312	0.0234238	-0.499462	-0.503328	0.0435011	-1.27032	-0.252315	-0.13767	-1.79608	-0.173877	-0.889181	0.518623	-0.249593	-2.02013	1.15519	0.475766	0.229925	0.269047	-0.114399
773	-0.995204	-0.374074	-1.00817	1.30573	-0.348796	-0.25	-0.384491	-0.282018	-0.373982	-0.13659	-0.171348	-0.146766	0.87042	0.482068	0.368325	0.26399	-0.0210421	-0.304931	0.488002	0.299884	-0.427849	0.372418	-0.0198246	-0.00127905	-0.607354	0.708251	-0.259393	-0.261976	-0.269552	0.639532	0.66641	-1.31603	2.27053	0.462806	-0.27307	-0.20837	-0.470084	-0.131366	0.766917	-0.0509796	-0.0967075	0.654522	-1.31065	1.3976	-0.147932	-0.346181	-0.726417	-0.310243	0.788236
915	-0.572721	-0.0582768	-0.536487	0.877728	-0.235445	-0.306559	-0.563045	0.171186	-0.312731	1.10684	-0.254226	2.18959	0.982316	1.48061	-0.101052	0.202653	-0.402068	-0.0844655	0.635705	0.153933	-0.270165	-0.406851	-0.90211	0.229636	-0.178816	0.82156	0.474895	-0.787385	-0.399426	0.400272	0.841656	-0.76572	-0.87855	0.0325353	-0.999211	-0.268436	-0.381026	-0.17344	-0.104619	-0.92683	-0.276031	-0.48078	0.19604	-0.137051	0.885606	-0.143146	1.24036	-0.954278	-0.088296
843	0.719993	0.234914	0.60171	1.46693	-0.167478	0.106302	0.249882	0.404731	-0.109503	0.920377	2.91304	-1.14449	2.08488	-0.382139	0.445794	0.661089	0.246145	0.0707777	0.237811	-0.0841321	0.159478	0.132089	0.0429575	1.00244	0.37623	0.904518	1.11728	0.11378	0.234875	0.281852	-0.991874	0.584564	0.0545474	1.12955	-0.675074	0.255619	0.382464	0.373575	4.55222	-0.432724	0.230324	0.155109	0.0667553	0.711239	0.42745	-0.0774649	-1.19246	0.270137	0.63156
645	-1.41515	-0.102638	-1.21443	-0.127371	-0.0110638	0.331291	0.0542979	-0.212125	-0.0143046	-0.823798	-0.160639	-1.29681	-1.15787	0.0294555	-0.0882443	-0.0584932	-0.721832	-0.155986	0.139604	0.251843	0.0870325	-0.202014	0.616715	-0.859127	-0.156113	-0.156861	0.0670844	0.374428	0.044296	-0.0938592	-0.275267	-0.729752	0.245898	-1.1665	-0.218821	1.04666	-0.696543	0.802475	1.22757	0.261957	0.528874	1.24471	0.134343	2.33606	-0.758644	-0.157377	-1.04861	0.365628	-0.530329
777	-2.42566	0.131964	-2.31011	-1.41603	-0.109089	0.65759	0.116407	-0.00744885	-0.124119	0.934613	-0.396666	-0.186799	-1.96584	1.86688	1.64479	0.186804	-0.261475	-0.0458949	1.62402	1.42467	-0.0408479	2.34464	1.24572	-0.555022	0.120543	0.592976	0.685876	1.67723	0.0283358	-0.729776	1.22541	-2.07958	4.37881	-1.44031	0.380768	1.94365	-1.13132	0.899265	1.81974	0.880945	0.36783	1.0835	-1.46039	2.18705	-0.439361	-0.206317	2.19195	-0.567113	2.58942
125	-1.4864	0.141408	-1.44853	-0.453106	0.586567	0.243461	0.289405	0.74245	0.58039	-0.969274	-1.0387	1.38873	-1.25993	-0.438213	0.573325	-0.430057	-0.396938	-0.0531495	-0.92364	-0.313613	-0.183765	0.412905	0.591646	0.577035	0.0413191	-0.209637	-0.906695	0.419592	0.276645	-1.09672	0.804744	-0.219736	0.905396	-0.438548	0.371362	0.198645	-1.03421	-0.167535	0.0705849	0.355287	-0.442291	0.0782741	1.27527	0.0660593	0.228201	0.312216	-0.711485	-0.204885	0.505076
390	-1.19684	0.436698	-1.1599	-0.672912	-0.103434	0.0374203	-0.126209	0.479335	-0.0889504	0.0855434	-0.00161438	-1.74373	-0.0396794	0.48664	1.18716	-0.599006	0.122628	0.024234	1.73367	1.0578	0.366123	0.739693	1.49532	1.20663	0.414098	2.06961	-0.649496	1.60096	-0.159933	-0.46401	0.0685676	-0.73159	1.62562	0.145441	0.865419	0.595674	-0.641439	0.537711	1.70783	1.12496	0.631129	0.408243	-0.34594	1.70249	-0.407911	-0.288976	-0.0400587	0.466659	1.29572
204	-0.618844	0.112102	-0.677534	0.57099	-0.477823	-0.442034	-0.734104	-0.959384	-0.497055	-0.21626	-0.774664	-0.495652	-0.284666	0.13071	1.36354	-0.928517	-0.36177	0.0717533	-0.260805	-0.103436	-0.160561	0.399361	-0.29355	0.315324	0.180056	-0.41826	0.260992	0.121246	-0.436374	0.0913068	0.347877	-0.229334	0.865675	-0.298309	-0.0435075	-0.414795	-0.535468	-0.395194	-0.427918	-0.311507	0.831037	1.17323	-0.652961	-1.25806	-0.45823	-0.708987	-0.324551	0.573257	0.431872
322	2.11453	0.476603	1.95787	-0.986211	1.14258	0.47943	0.781829	0.639068	1.14993	-0.0752361	1.12307	4.18739	0.26815	-1.95714	-0.338955	-0.335001	0.658406	0.0365673	-0.438993	0.453711	0.0718527	0.638438	-0.776827	-0.369581	1.00787	-0.624363	-0.884374	-1.00562	0.493072	-0.197317	0.703568	1.37236	-1.82261	0.183058	-0.789722	-0.0122909	1.18125	0.560495	-2.95085	-0.672034	0.136577	0.56393	4.3617	-0.715107	1.51125	1.10178	-0.384095	1.11392	-0.406556
323	-1.81401	0.0503949	-1.78433	-0.728046	0.084409	-0.266664	-0.17088	-0.0357787	0.0686957	-0.0430913	-1.70009	-3.37233	0.677197	-2.00893	0.166048	0.312848	-0.0823779	0.135661	-0.695811	-1.57647	0.347774	0.0927467	1.00824	-1.91927	0.0521279	-2.54798	-1.21348	0.338027	-0.0964333	-0.00861315	-0.316508	-1.12402	-0.195936	1.01543	0.852218	-0.456601	-0.377468	-0.314295	-1.34761	0.880356	1.31582	-1.64513	-3.27585	-2.6058	-0.711602	-0.113139	-0.620354	0.564278	-0.409619
325	-0.737761	0.0177224	-0.690897	-0.408544	0.953657	0.382293	0.828402	0.843664	0.97277	-0.387719	0.296085	-1.51461	0.226838	-1.59225	-0.773431	0.0898463	-0.157904	0.0652121	0.813578	0.410165	-0.0578355	-0.179455	-0.200627	-1.32193	0.00303216	-0.578534	-0.554839	-0.26135	0.581682	-0.326785	-0.224362	0.0274391	-0.683722	0.244363	0.214284	-0.172077	-0.239955	0.402519	-1.16469	-0.0345983	-0.431096	0.608433	0.702925	-0.715488	0.0186926	0.767113	-0.460536	-0.0351174	0.14208
205	0.867853	0.0496085	0.808094	0.79817	-0.969704	-0.142051	-0.321361	-1.09554	-0.986467	0.983464	2.14048	0.805944	1.26893	-2.82461	-0.360138	0.482985	-0.425922	0.105105	-1.12828	-0.409656	0.0233682	0.134001	-2.39536	1.67576	0.0324835	-0.651423	-0.235086	-2.14141	-0.206857	0.303134	-0.290965	-0.764271	-1.52267	0.256183	-0.756716	0.340577	0.171248	0.0739148	0.0114161	-1.57373	0.125785	0.814686	1.53306	0.839474	0.221382	0.189597	-1.11662	-0.0424532	-0.151858
327	0.534848	-0.44776	0.787784	-0.484926	-0.10463	0.399734	0.0961823	0.192993	-0.0580663	0.386654	-0.426939	-2.43496	0.231051	-0.060701	0.712634	-0.650625	0.791903	-0.0267378	1.03075	-1.08836	-0.181755	0.69754	0.510788	-1.53493	-0.455859	0.258594	-0.608801	0.340415	0.145952	-0.290112	-0.21784	1.11923	0.689072	-0.649902	1.40204	1.52714	0.872155	1.04652	4.25965	0.874893	0.747773	2.02677	-1.37202	3.01665	-0.486432	0.00760888	-0.0195895	-0.0157876	0.746979
206	0.555357	0.149026	0.495321	-0.354471	-0.809631	0.0478767	0.0266153	-0.483938	-0.704241	0.221113	0.322029	-0.588955	-0.60963	1.13189	0.24053	0.920727	0.667836	-0.0657362	-0.662634	0.217218	-0.140326	0.725565	-0.406655	-0.361687	0.332248	-0.672849	-0.12505	-0.450533	0.0610555	0.458525	-0.518066	0.142784	1.23328	0.447254	0.24421	0.182925	-0.128907	0.0154257	0.501159	-0.220701	-0.374073	0.099583	-0.477162	1.26948	-0.502232	0.91451	-0.276678	0.0911396	0.591715
69	-1.24887	-0.127581	-1.32082	-1.23697	-0.898566	-0.723256	-0.763431	-0.223492	-0.860043	-0.311355	-1.27027	-1.42865	0.446464	-0.0538282	-1.14314	-0.858149	-0.285213	-0.106741	-1.65297	-0.231117	-0.0185378	-0.690169	-1.21878	0.0158646	-0.211756	-0.0289983	-1.84521	-1.09277	-0.584192	-0.527692	0.101731	-0.706214	-1.64458	0.149014	-0.54963	-1.14073	-1.00155	-0.56982	-2.66383	-1.00007	-0.313604	-0.653366	-0.203848	-2.10013	-1.11665	-1.19916	-0.4036	-0.603113	-1.04675
70	-0.634924	-0.21072	-0.540335	0.33758	-0.067948	0.134203	0.248575	0.0408411	-0.0756423	0.711616	-1.48254	0.465013	0.876428	-0.669688	-0.529168	-0.0539725	-0.133318	-0.172301	0.205382	0.0648526	-0.204282	-0.381341	-0.918015	-0.103068	-0.301336	0.358134	-0.699394	-1.03297	0.253625	0.112889	0.389594	-0.220646	-0.189232	0.181964	-0.835522	0.237159	-0.47036	0.491097	-0.947535	-1.00568	-0.255008	0.708785	-0.352934	-0.937527	0.042801	0.0115875	0.466278	-0.337309	-0.155212
71	-0.428556	0.421411	-0.209879	-0.28776	0.105738	-0.0313638	-0.0658652	0.415504	0.0858195	-0.521957	-0.317699	2.53552	-1.03856	0.754905	0.705951	-0.52882	-0.50548	0.156508	-0.211277	0.67407	0.0423425	-0.348541	0.642057	-0.609451	0.52355	0.207671	0.451255	0.810149	-0.0158227	-0.708573	0.721445	0.576692	-1.12884	-0.177503	-0.197304	0.365253	-0.477984	0.191494	1.9741	0.194447	-0.173685	0.230807	-0.318647	-0.140136	0.198929	-0.0384966	0.471069	-0.247615	0.137494
75	0.382595	-0.0146494	0.410392	0.104514	-0.348872	-0.297858	-0.270134	-0.625391	-0.464905	1.62529	1.38127	0.0494299	3.07741	0.279993	-0.549164	-0.106924	0.399544	-0.238547	-0.758954	-1.33568	-0.154938	-0.840207	0.818875	-1.03819	0.0180608	-0.563049	0.00521126	0.584305	-0.0238414	1.10493	-1.25645	0.0423718	0.0548135	2.17207	-1.14729	-0.994915	0.197719	-0.361702	-0.042532	-0.00454163	0.120285	-0.805372	-0.195661	-2.87806	-0.203184	-0.468034	1.2132	0.0797502	-1.12868
77	-1.14471	-0.0879358	-1.0636	-0.153783	-0.71396	-0.112284	-0.730748	-0.755351	-0.671202	-1.41444	0.0798305	0.910649	-2.59725	0.479053	1.15449	-0.934649	-0.41953	0.0792675	-0.821707	-0.143685	0.252183	0.609256	1.09897	1.18521	-0.21437	-0.890258	-0.285858	0.465382	-0.621195	-0.416208	-0.315123	-1.04674	2.36962	-1.29588	1.05816	0.714259	-0.689096	-0.00149102	-0.1108	1.05254	0.442826	-0.0354254	-0.188257	0.118964	-0.4757	-0.73375	-1.02038	0.574221	-0.17751
79	-1.1481	0.0338059	-1.03877	-0.597727	-0.084026	-0.221445	-0.174626	-0.00654106	-0.105432	-0.555411	-0.411434	0.52513	0.316247	0.122097	-0.36192	-0.526671	0.263522	0.203412	0.228904	0.425194	0.18412	-0.908888	-0.472576	-0.0463264	0.0778558	-0.0330992	1.41982	-0.544103	-0.0339964	-0.242544	-0.746357	-1.79373	1.55296	0.821294	-0.892999	-0.60364	-0.807085	-0.294294	2.71497	-0.704331	-0.271255	0.589696	1.12489	-1.15841	-0.0414035	-0.192259	-0.786609	-0.671734	-0.550987
80	0.135209	0.215369	0.122768	-0.254723	0.500128	0.479472	0.662216	0.296062	0.470335	-0.407251	-2.23278	0.60822	-1.67074	-1.09965	0.527447	-0.35441	0.0454435	-0.137983	-0.306286	0.311139	0.044734	0.499665	-0.363041	0.0521809	0.32357	0.183213	-0.0449135	-0.481295	0.434164	-0.0990132	1.16677	-0.644523	-1.10873	-1.32704	0.401651	0.622505	0.086209	0.558733	-0.00615301	-0.0662335	0.250152	0.445027	0.165634	1.5643	0.459406	0.308821	0.211335	1.05098	0.128658
81	-0.0147692	0.329061	0.00319804	-0.260912	0.455273	0.128359	0.333707	0.366576	0.463761	0.579903	0.893211	0.509931	0.693651	-0.491325	0.415037	-0.224244	0.591539	-0.183128	-0.848331	0.545094	-0.422137	-0.809837	0.214072	-0.248869	0.44474	-0.323066	-0.885188	0.0190799	0.248072	0.310267	1.40416	-0.368898	0.804939	0.176764	-0.431077	-0.88393	0.00147726	-0.225504	-1.08365	-0.261101	-0.155725	1.38494	1.14346	-1.0353	0.209285	0.172336	1.05978	-0.31389	-0.520737
82	0.32356	-0.00520064	0.465748	0.510222	1.1388	0.600487	1.13379	0.8951	1.11812	0.212555	2.55689	0.717946	0.507307	0.201482	-0.444198	1.0611	0.423243	0.00797412	0.35139	0.514227	-0.0294227	0.161001	-0.402384	0.128752	0.00422936	-0.239449	-0.29336	-0.579103	0.837069	0.514474	1.02446	0.272478	-0.560121	-0.688387	-0.289418	0.207239	0.153167	0.463913	0.712939	-0.339602	-0.378418	0.599009	0.0384272	0.879494	0.776587	1.10932	1.30854	-0.411593	0.784214
83	-0.0793765	-0.21551	-0.0561347	0.0659752	-0.210403	0.359356	0.242733	-0.468492	-0.231372	0.604386	-0.597221	-0.0942398	1.86214	1.08638	0.913403	0.152188	0.545036	-0.123009	0.0665604	0.512432	-0.491116	0.270788	-0.177173	-0.413648	-0.22779	-1.19383	0.0604023	-0.441515	0.139472	0.280655	-0.546827	0.0738784	1.14069	0.582073	-0.0967406	1.29303	-0.0251446	0.811183	2.00283	-0.237181	-0.616239	0.921817	-0.390179	1.8057	-0.320849	1.02576	0.390577	-0.864207	0.84909
84	-0.709367	-0.0159665	-0.788028	-1.10761	-1.44747	-0.655113	-1.19522	-1.61581	-1.51046	-1.07785	0.304796	-0.827041	-1.89034	1.15242	0.56137	-1.05851	-0.404774	-0.058849	-0.134909	-1.23937	-0.143354	-0.24271	0.293516	0.456493	0.0475235	0.751163	-0.45335	0.200215	-0.864314	-0.847559	-0.487846	-1.3552	1.85392	-0.719699	-0.547397	0.0218477	-0.17974	-0.110137	-0.658422	-0.163965	-0.403664	0.415871	-1.32953	0.175093	-0.571466	-1.42688	-0.405923	-0.0771964	-0.132089
87	-1.03972	0.21822	-1.08731	-1.53204	-0.549515	0.455432	0.0252678	0.221187	-0.489547	0.227982	0.29602	-0.00874154	-0.896015	-0.525614	0.492445	-0.147153	-0.760549	0.0197503	0.528655	0.255462	0.113595	0.108764	-0.222639	1.00833	0.323707	0.181819	1.0095	-0.2269	-0.0458205	-1.08045	-0.0632229	0.0823278	-0.844888	-0.393983	-0.109929	1.84658	-0.454324	0.920744	0.976863	-0.208652	-0.500684	1.27822	0.630026	3.89101	-0.234903	-0.510179	-0.113719	0.0712368	0.015164
88	2.36659	-0.226612	2.45916	-1.10782	-0.956946	0.195469	-0.410314	-0.323891	-0.449851	-0.439135	0.81803	3.95776	-1.676	0.175071	0.476587	-0.787911	-0.0638693	-0.0238598	1.95876	-0.17786	-0.0827264	0.193656	-0.0869146	0.15283	-0.258538	1.56285	0.621941	-0.387531	-0.307573	-0.0439285	-0.00756173	1.69112	0.631212	-1.59342	-0.253092	1.75297	1.60816	0.354948	2.12991	-0.342737	-0.16847	-0.124232	4.46081	4.20148	1.62773	1.87227	-0.638253	-0.0321431	0.351343
89	-0.206801	0.153202	-0.15835	1.26102	0.377387	0.347437	0.289446	-0.326569	0.285109	1.17782	-0.209972	1.81158	1.68385	1.3104	0.142232	0.837658	0.40315	0.0929308	-0.0199199	0.414624	0.0756795	1.10909	0.811632	-0.52393	0.151141	0.531379	0.933697	1.00503	0.194952	0.371669	0.508206	-0.459141	0.594426	0.616403	1.80187	0.779141	0.0734351	0.69853	-0.697458	1.27871	-0.0256158	0.246734	-0.0648567	-0.491479	0.283601	0.213009	1.56063	0.186765	0.518633
90	-0.177218	0.190988	-0.222724	0.971296	-0.388247	-0.636908	-0.888224	-1.25764	-0.420449	1.04811	-0.265583	-0.729721	2.62684	1.42635	-0.129729	0.0780035	-0.143183	0.178858	-0.131448	-1.3576	-0.175963	-0.900093	0.271374	-1.00597	0.233864	0.537089	0.458563	0.730646	-0.73095	0.388729	0.0291414	1.53803	0.0762543	1.70372	0.963632	-0.906067	0.00638665	-0.533826	-1.27805	0.663594	0.167781	-0.797637	0.172551	-2.78896	0.380712	-0.586555	-0.424946	-0.212545	-0.456093
92	-0.328259	0.0184197	-0.343881	-0.167422	0.0103395	-0.129725	-0.703833	0.61146	0.016861	0.531212	-0.755286	6.11055	0.20912	-0.460305	0.508887	0.00358767	-1.29068	-0.0462346	1.20444	0.666983	0.205827	0.23826	-0.706745	1.044	0.304322	0.8601	-0.557013	-0.691663	-0.664735	-0.224684	0.20247	-1.48064	-0.919304	0.368751	-1.04055	0.475924	-0.00816466	-0.0291416	-0.0529535	-0.866733	-0.610202	-0.833667	1.40958	1.01806	1.96019	0.0158685	0.322537	-0.221142	0.767991
100	0.494849	0.0142266	0.484374	0.865228	0.940546	0.566438	1.02812	1.25094	0.930475	0.687045	-1.55848	-0.730314	1.29514	-1.14539	0.411411	0.241787	0.927087	-0.0632378	0.815655	0.949343	0.102971	-0.413147	-0.768257	-0.374189	-0.0625189	0.594389	-0.87329	-0.521144	0.741404	0.313464	0.230761	0.188752	-0.0226865	0.906269	-0.048783	-0.229084	0.265052	0.401616	-0.134304	-0.409528	-0.734536	0.43239	-0.533644	-0.31548	-0.208957	0.609565	0.725948	-0.809405	0.290062
[truncated: 1,619 more columns]

## Sheet: Loadings
Compound	Fact1	Fact2	Fact3	Fact4	Fact5	Fact6	Fact7	Fact8	Fact9	Fact10	Fact11	Fact12	Fact13	Fact14	Fact15	Fact16	Fact17	Fact18	Fact19	Fact20	Fact21	Fact22	Fact23	Fact24	Fact25	Fact26	Fact27	Fact28	Fact29	Fact30	Fact31	Fact32	Fact33	Fact34	Fact35	Fact36	Fact37	Fact38	Fact39	Fact40	Fact41	Fact42	Fact43	Fact44	Fact45	Fact46	Fact47	Fact48	Fact49
LC.03.0099	0.0844306	-0.00819801	0.0181151	0.032897	2.2172e-06	-0.0174027	-0.0132491	-1.56327e-06	-0.0452031	1.70975e-06	-4.09515e-05	0.0409407	0.019925	-0.0161465	0.000252091	6.25057e-05	-0.0476991	-0.0326515	1.08181e-05	0.044326	-1.36235e-06	4.12269e-07	-0.000924036	1.83603e-05	0.000457681	0.0383594	0.000223883	-0.000202062	0.0469102	0.000280159	-0.000554791	-1.04875e-05	-3.7298e-05	1.4687e-06	-0.0018471	-0.0192112	0.0403077	-5.95993e-06	-3.21225e-06	6.91823e-06	-9.63189e-06	8.90369e-07	0.000718236	3.43138e-05	2.89626e-05	-0.000492364	-0.00756093	-2.33741e-06	-2.84103e-05
LC.03.0077	0.0789301	-0.00683997	-0.00626999	0.0462165	4.48605e-07	6.06125e-05	-0.000168362	-0.00648282	-0.0289399	4.51805e-05	-4.3054e-05	0.0165977	0.0570132	0.000208688	-2.22309e-06	0.0167855	-0.0890361	-0.0543603	3.25666e-05	0.0595683	-2.80623e-07	9.91616e-07	5.61808e-05	1.98967e-05	-4.52449e-05	5.43114e-05	6.4256e-06	-2.97752e-05	0.0132728	-3.62607e-06	-0.000296365	2.60026e-05	0.000102037	-1.63592e-05	0.000305026	-0.0143994	2.11016e-05	-3.58157e-06	-6.57903e-06	2.61858e-06	4.7784e-06	-4.7543e-06	0.000132669	0.0670774	-5.24062e-06	-8.14534e-07	0.000349612	8.85456e-06	-4.47414e-06
LC.03.0149	0.0785895	0.0120918	-0.00876978	0.0252987	-8.70398e-06	-0.0418725	0.000418159	1.19906e-06	0.000249876	-0.000158722	-0.000806039	-0.00225286	-0.0238163	0.00712959	-1.80466e-05	0.0322809	-0.00193064	0.00171912	-4.0568e-06	0.000233039	0.000179137	-3.25121e-05	-0.00161504	0.000191056	-0.0124103	0.00451462	0.000142255	-9.8283e-05	-0.00121606	-0.000613792	0.00047924	0.000103227	0.0790862	-0.000112591	-0.0114391	-0.000452552	5.77278e-05	0.000132579	9.14592e-06	-0.000381647	-8.59186e-06	4.32325e-05	-0.000541621	0.000842351	0.000201911	8.85703e-06	0.00365375	1.91882e-05	-8.07975e-05
LC.03.0292	0.078213	0.00874691	-0.0453575	-0.03305	-3.51233e-06	-0.0310628	-0.0230621	5.52866e-05	0.0554125	-6.28701e-05	-0.000662594	-0.000141218	0.000774115	0.0217154	0.000494291	0.000124479	0.00174499	-0.0256388	4.94123e-07	0.0358423	-1.84922e-05	-3.09581e-05	0.000423757	8.86011e-05	-0.00140046	-0.0274313	-0.000483287	8.66185e-06	-0.0388736	-0.000225062	3.64334e-05	0.000255569	1.77642e-05	4.74718e-05	0.0215872	-0.0201156	-9.47315e-05	-4.01483e-06	2.59803e-06	-3.50688e-05	-2.17967e-05	3.80483e-06	5.52552e-05	0.0132316	0.000298197	4.40241e-05	0.00285626	3.54249e-05	1.94985e-05
LC.03.0352	0.0773131	0.0087194	-0.0296115	-0.0167495	2.30418e-06	-0.0369682	-0.0225562	3.07197e-05	0.0493253	-3.28236e-05	-0.000117103	0.01906	0.0223766	0.00444028	3.57406e-05	-0.0164747	-0.0254077	-0.0449908	-2.67437e-05	0.0452078	-6.4241e-06	-0.00015393	0.000131739	-1.78515e-05	-0.000202932	-0.052672	-0.00342286	6.92637e-05	0.0312499	-0.00077862	-0.000591712	-0.000237483	0.000416503	-0.0368524	0.00139928	-5.68341e-05	-0.000149551	6.84204e-06	-2.61866e-07	6.15305e-07	-2.29805e-05	5.58454e-06	0.000174829	0.00486934	0.00085011	1.77828e-05	-0.00103418	4.52562e-06	1.86766e-05
LC.03.0101	0.0768534	-0.0106224	0.000183726	0.0454137	-1.44052e-06	2.043e-05	0.00857231	-1.88111e-05	0.000137071	3.15544e-05	0.000769494	0.00264082	-6.30561e-05	-0.000364663	8.83918e-06	0.0296011	-0.0418984	-0.0604952	-1.95158e-06	0.0646779	-2.82757e-06	1.77897e-05	-0.0113921	0.00112846	-0.0248741	-0.0468094	-1.39776e-05	-3.10662e-06	0.000624928	-8.88626e-05	9.05782e-05	-8.05645e-05	2.60438e-05	-0.000137717	0.00103338	-0.0311893	0.000169029	-2.51348e-05	6.70375e-06	-3.79779e-06	-0.000653062	-2.18551e-06	0.000113746	0.0734829	9.41667e-06	-1.70211e-06	0.144349	1.57023e-05	-4.65115e-06
LC.03.0355	0.076447	0.000127136	-5.66879e-05	0.0283785	-1.12007e-06	0.000183973	-7.32163e-05	-3.97391e-05	-0.0200641	3.84332e-05	0.0102864	0.00232193	0.0353301	0.020757	-0.000505031	-0.0458409	-0.0687286	-0.0445257	2.0472e-05	0.0402597	4.10981e-06	7.07818e-06	0.00014887	-2.8233e-05	0.000114011	0.00181636	-2.20072e-05	-7.5935e-05	0.023272	1.6791e-05	0.0191954	0.000282486	-1.8631e-06	-7.24962e-06	0.0104949	-0.000149539	7.67925e-06	-1.18399e-05	-3.41311e-05	2.4702e-06	2.02952e-05	-5.96689e-06	-1.52698e-06	0.0626611	2.42826e-06	4.13632e-07	0.00235675	3.92613e-06	-4.52298e-05
LC.03.0129	0.0763944	-0.0120981	-0.0309927	0.0344555	-4.34337e-07	-0.0347671	-0.0346596	-4.25196e-06	-0.0711503	-7.65252e-05	-0.000187629	-0.0347123	0.0433298	0.000130059	5.94268e-05	0.0503637	-0.00190638	-0.0623938	2.86163e-05	0.0582756	1.59903e-05	-1.51191e-05	0.000183651	-5.14566e-05	-0.00157825	-0.0432916	0.0192799	-1.86024e-05	-0.000217743	-0.000981088	6.97584e-05	1.84957e-05	8.38651e-05	-0.00059355	0.000928972	-0.000436091	-1.3816e-05	9.00516e-06	-4.25295e-07	-6.23996e-06	2.16437e-05	3.54626e-06	-8.18769e-05	-0.00155221	-3.36825e-05	-1.27069e-05	0.000320509	-2.95686e-05	8.58673e-05
LC.03.0138	0.0760735	-0.0110589	0.0342631	0.0612872	3.37093e-07	7.25977e-06	-3.37042e-05	-1.34467e-06	-0.0279432	-3.62797e-06	-0.000169946	0.0357629	0.0432394	-0.000420126	-3.30822e-06	0.0136559	6.233e-05	-0.0475337	-7.55902e-06	0.0629064	1.96398e-07	7.58683e-07	3.87017e-05	-3.86768e-06	1.82728e-05	-8.07682e-05	2.41825e-06	1.67452e-05	0.0367896	0.000357266	-0.0104092	-4.08404e-05	-2.47589e-06	3.45864e-05	0.00248721	-0.0328487	3.71243e-05	-1.09943e-06	-4.10717e-07	8.97655e-07	1.19e-05	2.45786e-09	-6.61099e-06	0.000194631	1.44023e-05	-1.96698e-06	0.0507519	-4.29587e-06	-1.90911e-05
LC.03.0119	0.0758925	-0.00744204	0.0344061	0.0503845	1.55182e-06	-1.15082e-05	-0.0135417	8.75567e-06	-0.0403777	-1.02422e-05	-0.000281703	0.0504257	0.0334576	-0.000244078	2.76866e-05	2.85457e-05	0.0329273	-0.0303961	-1.25814e-05	0.0488738	-7.09008e-06	5.37677e-07	6.97468e-05	-2.16442e-06	3.83461e-05	0.0205632	3.41736e-05	-5.69485e-06	0.05087	7.49144e-06	-0.000143451	-3.22526e-05	0.0671052	0.000119381	-0.0156846	-0.0192062	0.000217672	3.10619e-06	6.2578e-08	9.29165e-09	1.65788e-06	-7.44329e-07	2.65819e-06	-0.0030633	-3.53147e-06	-3.27809e-05	-0.000517148	-3.14204e-06	1.04098e-07
LC.03.0404	0.0752713	0.0270976	0.000141055	0.000347526	-1.0189e-05	-0.00116028	0.00858345	-2.97375e-05	0.000311929	0.000523537	0.000782016	0.000802054	-0.0246508	0.021708	-4.24571e-05	0.0428061	-0.00591317	0.0176349	-0.000110977	0.000616976	0.0250339	-4.75858e-05	4.43663e-05	-0.00093605	0.000238242	0.0619636	0.000150056	-1.09513e-05	0.00240256	-0.0589791	0.000230764	-0.00347717	0.0462159	6.65301e-05	-0.000319438	-0.000670106	0.000187516	4.9775e-05	2.59678e-05	2.122e-05	-0.00889377	-3.72755e-06	-0.000113799	0.000950811	0.000281978	-0.000188771	-0.00661867	4.40077e-05	-0.000110735
LC.03.0199	0.0752054	-0.00549845	0.0336608	0.0448767	1.57675e-06	5.7146e-05	-1.43965e-05	8.50523e-06	-0.0201828	-0.000117751	0.000366715	0.024277	0.0291279	0.000157946	-0.000248092	-0.0475189	9.60678e-05	-0.0410258	4.02709e-06	0.0493959	4.05821e-07	4.58135e-06	0.00016381	3.77623e-06	4.13509e-05	-0.000271743	-4.99297e-05	2.49923e-05	0.0322493	4.6549e-05	0.000383693	3.23241e-05	-9.94524e-06	7.05464e-05	0.0123822	-0.0206231	1.68956e-05	-6.64319e-07	3.12897e-07	-9.75519e-06	1.95004e-05	2.85761e-06	-4.43711e-05	0.0174184	1.56449e-05	2.02412e-05	0.0408104	1.60221e-06	-2.76703e-05
LC.03.0236	0.0748145	-0.0350074	-0.0288418	0.0401281	-3.18559e-06	-0.032021	0.0242725	1.26018e-05	-0.0368061	0.000410793	-0.000258202	-0.00935886	0.0154322	0.00268332	0.000799547	0.0693516	0.0117181	-0.0227022	7.36853e-06	0.0162583	2.4612e-05	5.26662e-05	-0.000607559	-3.10348e-05	0.00382108	-0.000613687	0.000583069	-1.03394e-05	-0.0325815	7.06104e-05	-0.000100461	-3.10777e-05	-0.000235576	3.83403e-05	-0.006779	-0.000154094	0.000343427	1.98894e-06	2.40924e-06	-1.53533e-05	7.45606e-05	1.04139e-06	0.000114557	-0.00200039	-0.000211751	-1.16927e-06	-0.000178983	-8.83172e-05	0.000139068
LC.03.0333	0.0747763	-0.0333491	-0.0306944	0.0394669	-3.63199e-05	-0.0188319	0.0310532	1.44703e-05	-0.0475237	-0.000419229	0.00175277	-0.00759521	-0.0235044	-0.000722796	3.79197e-05	0.0802088	-0.0201049	0.0012609	4.64374e-06	-0.00288729	3.62535e-05	6.85893e-05	0.00052261	0.0308484	0.000757845	0.00549709	5.31534e-05	-3.59624e-05	-0.0476309	0.000312119	-0.000232798	0.0010594	-7.49248e-05	6.33422e-05	-0.0337699	-0.000182745	0.00040199	1.34588e-05	7.03229e-07	-3.44794e-06	7.17668e-05	5.47227e-07	8.57967e-05	-0.00299949	-1.14242e-05	1.07904e-06	-0.0360192	-0.00083204	-0.000114968
LC.03.0340	0.0744158	0.000710663	-0.00748712	-0.0201126	-1.19211e-05	-9.90657e-05	-0.0379703	0.00014346	0.114436	-0.000186424	-0.00176696	0.0214861	2.49129e-06	-0.00104309	9.97868e-06	0.000181609	0.0141256	-0.0088433	3.21872e-05	0.0140235	2.35404e-05	0.000163772	-0.00117698	-0.000134009	0.00147429	0.00139033	-0.00731868	-0.000165771	-0.000242745	0.000217583	-0.002214	-8.37131e-05	-0.0292146	-1.6787e-05	-0.00167637	-0.0194584	6.4139e-05	-4.0145e-06	-3.84711e-06	6.31087e-06	7.04487e-05	2.35295e-05	-1.21716e-05	-0.0396193	4.02381e-06	-4.19125e-05	-0.042414	-0.000330645	-5.38878e-05
LC.03.0171	0.0743574	-0.0115626	-0.0441663	-0.012127	9.18009e-06	-3.50058e-05	0.0142581	-4.32554e-06	0.0219151	-1.51659e-06	-0.000701146	-0.0185423	0.0173403	9.61834e-05	4.79905e-05	0.0137418	0.0281843	0.0264298	-1.66355e-05	-0.000538156	-0.000257753	2.35335e-05	4.18548e-05	-3.41042e-06	-0.000113655	0.00110526	0.000211197	-2.13098e-05	-0.114911	3.96733e-05	-4.55421e-05	-7.81474e-05	-0.0235537	7.70067e-06	-0.0213221	-7.72324e-05	2.61551e-05	4.70586e-06	-4.99823e-06	8.0996e-07	-4.36754e-06	-3.6654e-06	-0.000150491	0.0289859	8.97308e-06	0.000101305	0.0303715	-1.05427e-05	9.95687e-06
LC.03.0741	0.0742182	0.0123496	-0.000182659	-0.022192	1.5218e-05	-0.0285478	-0.018888	0.000104368	0.0385178	5.03692e-06	-0.000935934	0.036776	-0.000655007	-0.00449889	0.000176932	-0.0287993	0.00126883	-0.0464792	-3.49775e-05	0.0439844	-3.82249e-06	-1.22533e-05	0.0251527	-0.000110915	-0.00424734	-0.0156678	0.000126312	0.000181488	0.0394575	-9.44638e-05	0.0001382	0.000852599	-7.95536e-05	0.00140645	-0.000883215	-0.00135657	-3.71192e-05	4.47574e-05	-2.73039e-06	9.81815e-07	4.69674e-06	3.19544e-07	-0.000103192	0.000254765	0.000128485	0.000106846	-0.00134989	2.87335e-05	0.000130886
LC.03.0136	0.0736311	0.000337489	0.00483426	0.0360266	-1.95456e-06	0.0106908	0.0132637	-1.26088e-06	0.0150079	-0.000147852	0.0126691	-0.0014857	-2.23106e-05	0.00681696	1.53397e-05	6.66682e-05	-0.03573	-0.0545632	-1.73288e-06	0.052198	-2.20221e-05	1.74415e-05	4.91647e-05	0.00182035	-0.0192691	-0.048882	-0.000502343	1.46068e-07	0.000220813	-0.000195428	0.0229672	-0.000244086	3.03007e-05	2.97959e-06	0.032162	-0.0281877	2.73662e-05	-2.9032e-05	1.26607e-06	-7.32816e-07	-0.000117436	3.07952e-06	0.000437949	0.0923728	5.69911e-05	8.13656e-06	0.145554	2.7897e-05	-8.76916e-06
LC.03.0865	0.0734434	0.00325419	-0.0269689	-0.00979362	5.76118e-06	-0.0268103	-0.024791	-4.17833e-05	-0.0393224	0.00326786	-0.000205609	0.00532132	-0.000330924	0.0251842	0.000260896	0.0810642	-0.0100274	0.00223902	5.61841e-05	0.00128303	4.64991e-05	4.32384e-05	-0.0274766	-0.000737688	0.00800804	0.000158767	-0.000263311	-0.00205157	0.000202688	-5.98298e-05	0.00119784	-0.00191116	8.06549e-05	-0.000191099	-0.00216544	-0.0457852	5.36763e-05	-3.81602e-06	-1.80541e-05	4.06042e-05	9.40159e-05	-5.9606e-06	-0.000132149	-0.0867204	-1.68126e-05	-0.000806232	-0.0027932	-1.22538e-05	-3.91178e-05
LC.03.0685	0.0734137	-0.0230119	-0.0379602	0.0175614	-3.307e-05	-0.00141226	0.00441099	-1.45643e-05	-0.0481588	2.20613e-05	0.00240591	-0.0160439	-0.00156596	0.0109876	0.000207804	0.0841205	-0.0506544	-0.000953698	2.38295e-05	0.000513302	7.03536e-05	0.0001114	-0.011558	0.0269059	0.0001298	0.00111737	-0.00025038	-2.88121e-06	-0.0406338	-1.78712e-05	0.000235241	0.000754277	4.67568e-05	-0.000422536	-0.000532722	0.000542946	7.28139e-05	2.84747e-06	4.26013e-06	-9.02723e-07	0.000290838	2.33901e-05	0.000439363	-0.00941478	8.9402e-06	7.27669e-05	-0.0671276	-2.5141e-05	1.36692e-05
LC.03.0074	0.0732263	-0.000492862	0.000205703	0.000276293	-9.95085e-07	0.00730881	-0.0276824	-1.03291e-05	0.138191	1.13906e-05	0.000116028	-0.00028181	8.04329e-05	-0.00847614	-4.11191e-05	0.00806246	0.0539888	-0.000116412	4.26284e-06	0.0112999	4.5471e-06	7.86592e-06	0.000104984	1.3825e-05	0.000101869	0.000963712	-3.34369e-05	-3.63674e-05	8.434e-05	2.09548e-05	0.00010198	0.000159821	0.0191571	0.0194778	-0.0257792	-8.68005e-05	4.92936e-05	4.04404e-07	-6.28875e-07	6.70644e-06	-4.29664e-06	-1.14097e-06	-0.0183998	-0.0440428	-5.31255e-05	-5.98636e-06	-0.0484176	-1.14529e-06	9.99476e-07
LC.03.0065	0.07278	0.000149814	-0.0099695	-0.00835267	-5.83581e-07	-3.12547e-06	-0.00998631	2.19988e-05	0.143707	6.16995e-06	3.93153e-05	0.000157934	-5.21305e-05	-0.00897025	-3.93722e-06	1.26086e-05	0.03429	-8.47671e-05	5.35018e-06	0.0158277	-2.96158e-06	8.77546e-06	-0.000162883	6.77011e-06	4.2986e-05	-0.0010344	-3.01955e-05	8.67875e-07	6.97763e-05	3.3183e-06	3.97648e-05	0.000110408	-0.000265176	0.0188205	-0.0196387	-0.000110937	1.93983e-05	1.56744e-06	2.4149e-07	-1.25053e-07	4.42379e-06	-5.76213e-06	-0.0108819	-0.0310271	-0.000127288	-0.00899108	-0.0341797	-3.18278e-06	9.05947e-06
LC.03.0220	0.0723708	-0.010465	-0.0270798	8.18425e-05	9.69229e-05	0.000107913	0.000392222	2.91057e-05	-0.0189258	-1.48827e-05	0.000488866	-0.0531322	0.0054404	-0.000141856	3.6059e-06	-0.000611395	-0.0066564	0.0355744	-6.21155e-05	0.000268109	-0.000213578	6.59812e-05	-0.00023879	5.76112e-05	0.00114341	0.00136668	0.000686467	-0.000419145	-0.0892195	0.0245066	-0.0311838	-0.00786724	0.000428846	-0.0014537	-0.01529	0.032246	-3.01712e-05	-2.07656e-05	-2.63247e-06	3.9048e-05	1.87961e-05	6.50866e-06	0.000424312	0.00250754	4.67385e-05	0.000197463	0.00073274	2.03573e-05	4.26966e-05
LC.03.0108	0.0721424	0.0030948	-9.62745e-05	0.0128197	6.96305e-07	2.1433e-05	-0.0165788	3.54986e-06	0.146746	1.74823e-05	1.28202e-05	0.00140197	-0.000109844	2.17984e-05	-9.82039e-08	4.44197e-06	-0.000323747	-0.000724209	-5.74252e-07	0.000154448	3.12084e-06	-3.56671e-05	-6.65716e-05	8.18123e-06	-0.000169978	-0.0351155	-1.418e-05	-3.7445e-06	1.33583e-05	3.1518e-05	-5.98171e-05	-1.36005e-05	-6.27322e-05	0.020506	-0.0328124	-8.83698e-06	9.06426e-05	1.06288e-06	-2.97376e-07	4.4638e-06	-4.79851e-06	-5.12997e-07	-0.000190579	-0.0302235	-1.80315e-05	1.046e-06	-0.0444133	1.31475e-05	-2.36061e-06
LC.03.0295	0.0719174	0.0116087	-0.0180473	-0.00147615	-8.93736e-06	-0.0165878	-0.0566299	-5.82069e-06	-0.0485772	-7.77894e-06	-0.000304807	-0.0217256	0.0181287	0.0200602	-3.57665e-05	0.0425899	-0.0730171	-0.0247942	0.000228002	0.0423173	-7.94974e-05	-1.32123e-05	0.00200128	-0.00010899	0.000134453	0.0436393	-0.0105395	-0.0351227	0.00114087	-8.12479e-05	0.000424061	-6.61067e-05	-0.00200538	0.000216383	0.0230915	-0.00103329	-0.000120212	-1.51852e-05	-9.51078e-06	8.40283e-06	5.501e-05	-1.02879e-05	8.47631e-05	0.00167018	-0.000117152	-2.75553e-05	-0.071752	5.96903e-05	3.37717e-05
LC.03.0409	0.0718576	0.0130003	-0.0302774	-0.0203038	-3.6045e-05	-0.0195298	-0.0522018	-5.27143e-05	-0.0383824	-0.000208556	-0.000341604	-0.00485551	-0.00024468	0.00142649	0.000112196	0.074131	-0.0427082	-0.00280621	8.7152e-05	0.00181906	-0.000105837	4.18675e-05	-1.86464e-05	-7.51937e-05	0.000172284	-0.003158	-0.000159425	-0.0335243	0.0006045	-0.000120123	0.00108016	-0.00361709	-0.000936394	-8.6229e-05	-0.021185	-0.0300867	9.07448e-05	-2.10948e-05	4.35347e-07	-3.42209e-06	5.46685e-05	-7.40635e-06	-0.000358132	-0.0542448	-0.000292098	-9.03026e-05	-0.00524953	-3.91386e-05	-5.83428e-05
LC.03.0343	0.0718065	-0.00205439	-0.000339128	0.0317496	2.11257e-05	-0.0590649	-0.033534	-8.55018e-06	-0.0679402	0.000112326	-2.34783e-06	-0.0343232	0.00173619	0.000389566	2.64126e-05	0.0587169	-0.00261297	-0.0387584	-0.0021117	0.0545416	5.2038e-05	-0.000222949	-0.000112739	-2.05803e-05	6.74202e-05	0.02731	0.0234021	0.000495599	-0.0637255	-0.000727827	-0.000147818	-0.000115794	0.000134621	8.56245e-05	-0.0333374	-0.000530332	-5.32762e-05	6.69476e-06	6.51065e-08	2.92428e-06	-5.4392e-05	-2.01305e-05	-0.000377725	8.5807e-05	-5.79697e-05	-2.7292e-05	-0.000279811	-6.65557e-05	-1.00467e-06
LC.03.0397	0.0711535	-0.0137883	-0.00065204	0.000289383	-9.03206e-06	-0.000274867	0.00161219	-2.02863e-05	0.0698755	-7.58625e-05	-0.000244002	-0.0036919	-0.000364461	-0.00634978	-0.000171418	0.016224	-0.0141952	0.0436994	0.0526165	-0.0202221	3.96113e-05	0.000320819	0.00323836	-1.25885e-06	0.0131697	0.0530115	-0.000969723	0.000111307	-0.0756403	-0.00301844	-0.00127009	0.000467735	-0.00046435	0.000123931	0.00225634	-0.000218471	-0.000233585	-7.12937e-05	1.69755e-06	2.12856e-05	-3.96859e-05	-8.23751e-07	0.000354443	-0.00361696	0.00054431	-8.15043e-06	-0.000657936	-2.06782e-05	4.87576e-05
LC.03.0280	0.0707112	0.0229692	-0.000591479	0.0129523	6.18197e-07	0.000229186	-0.0307626	0.000338682	0.108193	-8.75196e-05	0.0125037	0.00619116	-0.0103832	-0.00129035	-1.13608e-05	8.72222e-05	0.0652535	0.00131428	2.10737e-05	-0.00104653	-7.0527e-06	7.10384e-06	0.00052452	-0.000197897	-0.000197669	-0.0153707	-0.000836078	-6.49628e-05	0.00109999	1.28735e-05	-0.00185234	-6.86841e-05	0.102262	-0.00023352	-0.0139573	9.81416e-05	-5.72042e-05	4.56708e-06	-6.94982e-06	2.02519e-05	-3.84453e-05	-1.54481e-05	7.93706e-05	-0.02972	4.51256e-07	2.69196e-05	-0.00131016	-6.95281e-06	6.75051e-05
LC.03.0337	0.0707024	-0.000707353	0.000489722	-0.0155949	-2.3564e-05	-1.67502e-05	-0.0348952	-0.0148964	0.108173	7.14139e-06	-0.000373968	0.000528638	-2.62755e-05	-0.00593521	5.55348e-06	0.0214085	0.0346451	-0.00512299	-8.78641e-06	0.0488425	-4.3518e-06	-1.98872e-05	7.72641e-05	1.09268e-05	0.000348419	0.00461941	-0.00102874	-3.37767e-06	0.00204346	3.29384e-05	-0.000315475	4.08817e-05	6.71452e-05	0.000237287	0.0227362	-0.000643873	2.16147e-05	-5.71756e-05	-5.59391e-07	4.7417e-05	-9.09096e-06	5.27844e-06	-0.02107	-0.0571887	-1.11251e-06	-0.000222165	-0.0889234	-0.000171281	-2.76313e-05
LC.03.0703	0.0705441	0.00210908	0.000494438	-0.0264763	-1.11426e-05	-0.0143359	-0.0341703	-0.000983592	0.116761	-0.00068815	-0.000306757	-0.00264646	0.000139187	-0.0149262	-0.000726575	0.000175321	0.00075085	-0.0019163	-6.52077e-06	0.0523792	-6.94804e-06	-1.5232e-07	7.34229e-05	1.0134e-05	2.91716e-05	9.95273e-05	1.29659e-05	-1.85549e-05	0.0249606	1.1892e-05	-0.00260639	0.000135548	0.000161045	0.0323616	0.000342431	0.000110672	2.44453e-05	-3.61215e-05	4.03172e-06	3.08095e-07	0.0003703	7.79425e-06	-0.00034501	-0.0430128	0.000140799	-7.57464e-06	-0.0665008	-2.29702e-05	-6.33723e-05
LC.03.0603	0.0703809	-0.0157072	-0.0360295	0.014705	-9.47039e-05	1.28747e-05	0.00709773	0.000232903	-0.000513531	4.15181e-05	0.000435231	0.0340487	0.00120809	-0.00732959	-1.66987e-05	0.0281301	0.0770425	-0.00628042	-1.73903e-05	0.00552007	-2.5521e-05	-3.6194e-05	4.57518e-05	0.000119732	0.000378363	0.000738654	0.000350864	-6.36551e-06	-0.137743	-2.5232e-05	0.000364611	-4.15362e-05	7.87088e-05	8.88166e-05	0.0731209	-8.73646e-05	2.46067e-06	-9.82057e-06	8.49833e-07	-4.2099e-05	-0.000119376	-9.92767e-06	3.99509e-06	-0.0550156	2.15615e-05	0.000106094	-0.00043383	1.54182e-05	1.41201e-05
LC.03.0278	0.0702058	0.0111582	0.0022428	0.0249645	2.60933e-06	0.0304361	-0.00325436	-1.27977e-05	0.100881	0.000498683	0.000567414	-0.000570139	-0.000609543	0.000139956	-2.0633e-05	-0.0182462	-0.00589472	-1.31603e-05	-1.94564e-05	0.000762012	2.31441e-06	2.76948e-07	-0.00769783	9.49289e-06	0.000164049	3.92284e-05	-8.40373e-05	0.000401329	-0.00158381	9.04801e-06	-7.01369e-05	-0.000525841	-9.2635e-05	0.00144041	-0.0145868	6.36417e-05	-0.000239825	-3.88402e-06	-1.43109e-06	-5.96886e-05	-1.94174e-06	-5.02411e-06	-4.77684e-05	0.00861686	4.41144e-06	-1.82741e-05	-0.0293551	-1.12269e-06	-5.81593e-05
LC.03.0478	0.0700305	0.0103867	-0.0375648	-0.0446641	6.34053e-07	-1.3452e-05	-4.0053e-05	1.8265e-05	0.125082	-4.59155e-05	4.0728e-05	-0.000447929	0.000756031	-0.00051037	-8.93002e-07	-3.1997e-05	0.000605229	0.011143	6.92518e-07	-0.0129394	-3.77271e-07	0.000260005	-0.000254562	2.07994e-05	-1.66247e-05	-0.0231043	0.000528394	-8.59653e-06	-0.000124149	-1.16786e-05	4.21346e-05	-0.000126636	-1.06452e-05	7.50579e-06	-0.00302046	9.19644e-05	-6.50204e-06	2.14453e-06	9.21414e-07	2.54786e-06	2.21843e-06	2.25516e-06	0.000131094	0.000485552	-1.29018e-05	8.815e-06	-0.0359638	2.48091e-07	1.73566e-07
LC.03.0021	0.0699261	0.0126436	-0.0325795	-0.0216025	2.24999e-07	-5.14557e-06	-6.62223e-05	2.70025e-06	0.134482	1.03711e-05	-3.16403e-05	-0.016973	-0.0131159	-0.000145838	3.94548e-05	-0.0059061	0.0139043	0.000203207	5.13037e-06	4.128e-05	5.53528e-07	-8.78215e-07	-3.85103e-05	-6.28211e-06	0.000211716	-0.000627513	2.40817e-05	6.07502e-06	0.000164524	3.14628e-07	0.000672461	3.28352e-05	2.6382e-06	1.38271e-06	-0.000308833	-2.7092e-05	-6.11726e-05	-6.4652e-07	3.21902e-06	-0.000165997	-8.19511e-05	-7.59276e-07	0.000148445	0.0128553	-1.83829e-05	-7.58733e-05	-8.8707e-05	-2.3062e-06	6.95242e-06
LC.03.0347	0.0698229	-0.00337384	-0.0236866	0.035356	-1.27816e-05	-0.0199967	-0.00181581	-3.90544e-05	-0.0286673	7.35109e-05	-0.000422214	0.0213271	-0.00182623	0.000759055	1.99095e-05	-0.000101922	0.00145574	-0.0546247	1.17062e-05	-0.000173023	2.3823e-05	9.63545e-06	0.000847783	-2.05111e-05	-0.00494065	-0.0296828	-0.000186372	4.83351e-05	-0.0673692	7.31431e-05	0.000988373	0.00119208	-0.000134994	-0.122962	0.0203651	0.000151526	-9.58875e-06	6.42759e-05	1.10171e-06	-0.000135149	7.82638e-05	-2.25248e-06	0.000943074	-0.0528411	0.000156553	-0.000123105	0.0013394	2.64321e-05	0.000931945
LC.03.1097	0.0695757	-0.0020281	0.0137905	0.020441	0.000914669	-0.00036518	-0.0124902	-1.2978e-05	-0.02288	-0.000668337	0.000185	0.0179983	0.0275629	-0.000379522	0.000279367	-0.0519483	-0.0914441	-0.0336599	1.3244e-05	0.00639919	1.76319e-05	-5.80594e-05	0.00104273	1.3222e-05	0.000232517	0.0170202	0.00076783	0.00014013	0.0393418	-9.79679e-05	8.71112e-05	0.000134097	-0.00141679	-0.00549089	-0.00235452	-0.000105006	2.66864e-05	-1.67099e-05	-1.81835e-06	-2.90169e-06	-0.000389249	-4.9112e-06	0.000994211	0.0120121	0.000234639	-2.98272e-05	-0.00135753	-1.44444e-05	-0.000105164
LC.03.0242	0.0693415	0.0118351	-0.031643	-0.033385	4.66424e-07	-0.0173474	-0.0221695	-7.28845e-05	0.116663	-4.54693e-05	-0.0128956	-0.0282362	8.97997e-05	-0.0126051	-0.000405343	7.38356e-05	0.000672929	0.00123104	2.79112e-06	0.0278643	9.72455e-06	1.79357e-06	8.94425e-05	8.41525e-05	0.0010235	-4.78167e-05	7.77041e-05	-3.54791e-05	0.0199951	2.06964e-05	-6.37143e-05	-0.000789144	0.0031605	5.81379e-05	0.0332682	1.35603e-06	-3.67522e-05	-0.00012738	7.89476e-07	-1.06246e-05	-8.65368e-07	-4.23677e-06	0.000285967	-0.0004825	4.86803e-05	-1.62049e-05	-0.0481844	-1.75284e-05	-0.000171556
LC.03.1053	0.0690509	0.00440328	-9.30532e-05	-0.0308977	2.17344e-06	-0.000229269	-0.00244374	1.12784e-05	0.0445057	0.00455066	-0.0382042	-0.00112256	0.000300014	0.0264329	0.000170876	9.24048e-05	-0.0382462	0.0322206	2.77332e-05	-0.00722696	-5.85023e-05	5.42569e-05	-0.000740092	-0.000202894	-0.00100339	-0.00135263	-0.000378071	-5.1927e-05	0.000459433	0.000113576	0.000535482	0.000643609	-0.00149409	2.4102e-05	-0.0234173	0.000589272	0.000117643	-1.8586e-05	2.78263e-06	6.19864e-05	8.26796e-05	7.79732e-05	-0.000303239	-0.00611558	-6.37287e-06	2.33574e-05	-0.00574293	0.000130284	9.19178e-05
LC.03.0042	0.0689281	0.0150793	-0.0331727	-0.00712754	2.91314e-06	1.41543e-05	-0.00640982	-7.48463e-07	0.135542	7.72003e-06	-2.33444e-05	-0.0209018	-0.000286877	-0.000101574	7.16659e-06	-0.0117195	-0.0148057	-0.000129367	4.52282e-06	-5.14198e-05	-2.89231e-06	-2.29223e-05	-0.000152415	8.56113e-07	3.37404e-05	-0.0364148	0.000396217	-5.85035e-07	1.25152e-05	-7.72234e-06	7.14752e-06	2.48403e-05	5.60833e-05	2.13459e-06	-0.0112264	0.000785166	-1.58255e-05	-1.7397e-06	-9.02965e-08	3.63561e-07	-4.44288e-06	2.40415e-07	5.12388e-06	0.0224877	4.76322e-06	2.7914e-06	-0.0178712	6.13128e-07	5.33603e-07
LC.03.0601	0.0687326	-0.00790742	2.14926e-05	-0.0532178	-8.05705e-05	-0.0194316	0.000930569	7.41989e-05	-0.0174663	-6.95896e-06	0.00035974	0.00042285	-0.0959164	-0.0170906	6.75469e-05	-0.00092485	-0.000168019	-0.0404762	-0.000142217	0.0739708	-6.3452e-05	-7.91929e-05	-0.00377594	-0.000156325	-9.06886e-05	0.10688	-0.000232636	1.32151e-05	0.00434081	-0.000145341	-0.0280178	0.000285333	-0.0367515	-0.000126769	0.00249309	-0.000143897	0.000202819	-5.44349e-06	3.79429e-08	-1.36533e-06	-2.86084e-05	8.31587e-06	0.000691414	-0.0634428	-7.41235e-06	-5.71988e-06	0.0492359	-2.91233e-05	-5.90098e-05
LC.03.0490	0.0684645	-0.00562754	-0.00112293	0.0356973	-4.32902e-05	-0.0320675	-0.016405	1.76295e-05	-0.0931303	0.00105806	8.13754e-05	-0.00100916	0.000601894	-0.00637762	-0.000187678	0.0292124	0.00388131	0.00191962	-3.22599e-05	0.00837982	9.46447e-05	0.0239635	-0.0227949	-0.000579374	0.000739124	-0.0201566	-0.00198368	-2.09781e-05	0.00200033	-0.000888578	-0.000330212	0.000113473	-0.000740291	-0.000183773	-0.0581228	0.00120304	-0.000233732	1.38266e-05	3.84348e-08	-8.79586e-06	5.30002e-05	0.000328275	0.000763759	-0.00305611	-1.13192e-05	-0.000132758	-0.00411139	-3.51885e-05	-9.67962e-06
LC.03.0197	0.0683282	-0.0130248	0.0602459	-0.000170699	-5.88939e-07	0.0405115	0.000509593	9.29924e-07	-0.0484563	-0.000161984	0.000404286	0.0232482	0.0553183	0.0178045	-0.000123107	0.000301951	-0.0184144	-0.0413668	-1.28854e-05	0.00412439	-7.58096e-07	6.94239e-05	3.60694e-05	-0.000200262	0.000655386	-0.0682296	-0.000259738	0.000137186	0.0134969	6.17297e-05	0.0166283	-0.000104357	-2.83263e-05	0.000267352	0.0124566	-0.0509638	-4.03587e-05	-5.98991e-06	-2.63056e-08	-7.15486e-07	7.78968e-05	-1.69758e-05	-6.50814e-05	0.0433841	-0.000135322	5.15603e-06	8.69262e-05	-7.76255e-06	-4.33217e-07
LC.03.0708	0.0681559	0.007838	-0.0245443	0.000259004	6.35761e-07	0.0097745	0.000330577	1.38468e-05	0.140312	5.21584e-05	0.00900834	-6.59486e-05	-0.000114304	0.000155166	1.13017e-05	2.00538e-05	-0.0487796	7.1283e-05	-1.45459e-05	-0.00166164	-4.4444e-06	-5.15314e-06	0.00013274	6.35479e-06	-5.73693e-05	-0.0425822	0.00145655	9.4862e-05	-5.92919e-05	-2.11074e-05	-7.61071e-05	-2.09145e-05	-0.0142806	0.021374	-0.0305065	3.67369e-05	4.13674e-06	1.78097e-05	-1.2999e-05	1.08283e-06	3.0862e-07	5.22241e-06	-0.00010563	-0.0041413	-3.91329e-06	6.25075e-05	0.000153134	1.21981e-06	1.52014e-05
LC.03.0080	0.0679057	0.0130603	-0.0005149	-0.0276194	-9.51184e-06	-0.0194744	0.0134782	5.05694e-05	0.0286005	-3.7177e-05	-0.0217552	-0.00756912	0.000813182	-0.000718708	-2.80384e-05	0.0340617	-0.00115959	0.0707774	-0.000102668	0.00219678	0.0167363	5.12405e-06	4.15357e-05	-5.52349e-05	-0.00225442	0.0566523	-0.000443349	4.31893e-05	0.000799729	-0.033147	0.000254128	-0.0313401	-0.139271	0.000156792	0.00118566	-0.0445665	-0.000656322	1.9131e-05	3.74758e-06	-0.000360052	-9.83556e-05	-1.57834e-05	-0.000516831	0.0287375	2.33961e-05	-1.52799e-05	-2.5768e-05	-9.3178e-06	7.41284e-06
LC.03.1027	0.067743	0.0178177	-0.0358962	-0.02064	1.2431e-06	-0.000509818	-0.0245522	9.19282e-05	0.107896	-0.000197406	-0.000817359	0.00673213	3.7282e-05	-1.38424e-05	2.8273e-06	0.000600555	0.010238	0.0113508	-6.09812e-06	-0.00491932	-1.99699e-05	-2.53685e-06	-0.000297044	1.32091e-05	0.000320783	-0.00165377	-0.00010681	-3.01787e-05	0.00193666	-0.000406673	0.0015639	0.000387125	0.000477683	-0.000218078	0.00158137	0.000125314	-6.08095e-06	4.47568e-06	5.19508e-06	-1.6763e-06	-9.22069e-05	1.08741e-05	5.81301e-05	0.0232901	-3.75524e-05	1.75576e-05	-0.000467676	8.16914e-06	-2.35367e-05
LC.03.0581	0.0675744	0.00852818	-0.0130295	-0.026211	-1.34467e-05	0.065037	-0.0119742	0.0226259	0.0392833	6.16818e-05	0.00138129	0.00149267	-9.3016e-05	0.0135608	-2.13682e-05	-0.000128002	0.000880834	0.0382166	-7.6047e-06	0.000578528	4.95502e-05	1.65648e-05	0.000107293	-9.9186e-05	0.0157424	0.0828691	-0.00023028	4.59705e-05	-0.000396217	8.47042e-06	-0.000480234	0.000264569	-0.0516692	-1.41415e-05	-0.0015737	2.84951e-05	-0.000116796	-1.74973e-06	-0.000148337	8.21904e-08	0.000367381	2.65233e-06	8.75526e-06	0.000809491	0.000379161	5.23942e-06	0.125879	-1.77799e-05	-9.86086e-05
LC.03.0740	0.0674754	-0.000104216	-4.15879e-05	-0.0484529	-1.37561e-06	-0.000191402	-0.000863774	0.000147455	0.00800299	-0.000565959	0.000294161	-0.0271019	-0.0860341	-0.0254989	-2.0733e-05	-0.0424884	0.000263105	-0.0169093	1.19332e-05	0.056654	-2.2067e-05	0.000130607	0.00012005	0.00027835	-0.000758871	0.0728283	-0.00587199	-0.000251304	0.00331562	-2.5313e-05	0.000239366	0.000419289	0.000110861	-9.33865e-05	0.0262921	0.00254386	2.76673e-05	3.73715e-05	-5.64371e-07	-1.04917e-05	-2.88219e-05	5.20235e-05	0.000202995	0.0121153	1.99124e-05	3.91668e-05	0.0400108	0.000221035	-3.34823e-06
LC.03.0234	0.0674524	0.00582597	-0.0347337	-0.0572919	4.42201e-08	0.000111214	0.000625342	2.05202e-05	0.115859	-8.96892e-06	-6.31934e-05	0.0102552	0.000179233	4.88857e-05	2.51093e-05	-0.000712824	0.013447	0.0115326	-6.43934e-06	-0.0185786	-3.34633e-07	0.0158394	0.000133313	9.46239e-06	-0.000117416	-0.0287335	8.14149e-05	-1.11841e-05	-9.7314e-05	4.11852e-05	4.61131e-05	-0.000465106	-0.000105032	-2.61392e-05	0.00144985	0.000235557	4.14246e-05	1.2652e-06	3.317e-06	-5.74739e-05	1.75739e-05	1.08236e-06	0.0270065	0.000585186	5.08131e-06	1.75937e-05	-0.0218447	5.27979e-07	1.2028e-05
LC.03.1035	0.0671724	-0.0126294	-0.0478489	-0.000629662	9.62971e-07	-0.000239719	0.0126149	2.13779e-05	0.00158073	-0.000216184	0.000319325	-0.0176661	0.000531432	-0.0366793	8.02644e-05	-0.000438521	0.00145982	0.0155599	-2.63616e-05	-0.00176168	4.99924e-05	-0.000127593	-0.000868535	0.00123638	-0.000430235	-0.00329151	-0.000251861	0.000101203	-0.106883	-9.65183e-05	0.000604514	0.00049535	-0.0322606	-5.91931e-05	0.000512817	7.35072e-05	-1.09083e-05	-5.5323e-05	-1.31974e-05	-3.96819e-05	-7.12463e-05	-7.16099e-07	-0.000729054	0.00789032	3.71031e-05	0.000254815	0.0129126	-3.62729e-05	8.58537e-05
LC.03.1089	0.0671073	-0.0123978	0.0211756	0.00426192	-2.32037e-05	-0.0307795	-0.00431741	0.000281334	-0.042159	0.000521057	-0.0203564	0.0625424	0.0410988	-0.0190023	0.000143494	0.00055757	-0.010001	-0.0285967	-9.38312e-05	0.000428828	6.12955e-06	-2.87811e-05	0.000939287	-0.000173463	-0.000210739	0.000675955	-0.000198504	2.93152e-05	0.000353121	0.000107742	0.000290223	-0.000830486	0.00124412	0.000361018	-0.0269763	-0.000330152	0.000754886	0.000202068	-4.1282e-05	-3.40709e-05	0.000865319	-1.41816e-05	0.000500479	-0.0302157	-1.83697e-05	-3.40257e-05	-0.0592754	-2.80078e-05	-7.09809e-05
LC.03.0733	0.0659942	-0.0132935	-0.0158119	0.0300145	-3.15997e-05	-0.000684035	0.000672396	3.35868e-06	-0.00415094	0.000195169	-0.000106247	0.0270833	-0.000543429	-0.00461796	-0.000144026	0.000363171	0.077185	-0.036434	-7.28821e-05	0.00134531	5.79766e-05	-1.1029e-05	0.000764991	-0.000297808	0.000202483	0.00348204	0.000199952	0.000151813	-0.13359	5.96334e-05	0.00124283	-0.00058071	0.000727339	-4.34414e-06	0.0767558	-5.7736e-05	-0.000544307	-1.48255e-05	-3.67495e-06	-1.88451e-05	-0.000204972	-5.08385e-05	1.1159e-05	-0.102304	3.60858e-05	-6.61319e-06	-0.00214174	-1.48056e-05	-5.9534e-06
LC.03.0221	0.0658988	-0.0267455	0.000116194	0.000528226	7.85474e-07	-0.0210785	0.0011658	7.06795e-05	0.000282953	-6.87494e-05	-1.74729e-06	0.0159392	0.0182926	0.0190721	-1.20485e-05	0.000399274	0.0534128	0.00248564	-0.000202901	-0.00831938	3.8917e-06	-6.62224e-06	-0.0290912	0.000463492	-4.56324e-05	0.017039	-0.000122842	1.46711e-05	-0.0752164	0.000426611	-0.000417591	-0.000363913	0.000262122	0.000169663	-0.00223803	6.7768e-05	-7.63052e-05	-1.17718e-05	-2.49001e-05	1.21786e-05	7.13266e-06	-6.06178e-06	-8.6269e-05	0.0351489	-3.57188e-06	0.0296577	0.000561307	-3.56288e-05	1.66598e-05
LC.03.0297	0.0653092	-0.0125433	-0.0683298	0.0108588	1.03125e-05	-0.000302867	-0.000261429	1.23267e-05	-0.000803426	-0.000114592	-5.03321e-05	-0.0325279	0.00603805	-0.000436361	-2.31712e-05	0.0394527	0.000338096	-9.60819e-05	3.18601e-05	-4.56053e-05	4.02644e-05	-1.113e-05	0.000217277	0.000105831	0.000245109	0.00359313	0.000549122	-4.93181e-06	-0.209498	-5.75969e-05	0.00100821	-0.000466178	-0.00036971	-3.14552e-05	0.046269	-0.00017784	-7.63972e-05	2.6809e-06	2.66066e-05	-5.38424e-06	-5.81947e-05	6.37844e-06	1.91411e-05	-0.0935813	5.69125e-05	-1.65787e-05	0.000132625	4.19883e-06	7.9394e-06
LC.03.0279	0.0651071	0.0104119	1.45113e-05	-0.0369733	8.73744e-08	4.98101e-06	-0.0107994	0.0118303	0.129976	-2.9672e-05	9.75852e-05	0.0113222	-0.0264594	0.0059755	1.80159e-06	-0.0108378	-0.0408258	-0.00256247	-6.58556e-05	0.0483105	-2.13226e-06	-0.000241705	0.00200441	-6.01757e-06	-0.000476116	-0.0326588	-0.00303092	3.05247e-05	0.000356737	-3.68964e-05	-0.000776231	4.74821e-05	0.000312688	-7.74009e-06	-0.0242199	0.0240372	-7.3249e-05	-4.01658e-07	-2.61716e-06	1.94813e-06	-4.90216e-06	3.86664e-06	0.000136986	-0.0208417	-2.2982e-06	4.22773e-07	-0.040847	0.000337164	-1.95474e-05
LC.03.0597	0.0648557	0.0173693	-0.0417902	0.0295119	-2.08545e-06	-0.0518808	0.00704377	5.68005e-05	-0.0306077	-0.00221786	0.000934888	-0.00979361	-0.0290795	0.00100266	-0.000171581	0.0400014	-0.0012462	-7.55102e-05	-9.6312e-05	-0.000827073	-1.34851e-05	-0.000130898	0.00148858	-7.20972e-05	-0.0334683	-0.000760431	0.000123885	-6.03734e-05	0.000872089	-0.000573015	0.000911774	0.00145374	0.0526249	0.000151955	-0.0110295	-0.00126327	0.000360691	6.04681e-05	3.29534e-06	-0.000558897	-0.000239358	-6.71342e-05	-0.000569249	0.00207942	-0.000245892	-7.8927e-05	-0.00134601	6.31026e-05	-0.000143454
LC.03.0222	0.0646063	0.0114794	0.00029788	0.0225173	-5.2535e-05	2.86112e-05	-0.028671	-1.55943e-05	-0.0992261	0.000191413	0.000387039	0.0055553	0.000269516	-0.000469134	-0.000187652	0.082455	0.000626843	0.0236458	5.75937e-06	-0.0136352	-1.70436e-05	0.000184492	-0.000928169	3.35555e-05	-0.000344687	-0.00427005	-0.0237994	-0.000199342	0.0613515	0.000128223	-0.000529742	0.000136345	-0.0542066	-0.000362383	-0.120768	0.00103707	0.000237113	-7.84325e-06	-1.49563e-05	1.15069e-05	0.00031775	-2.42268e-05	-0.0005637	-0.00478621	-0.000107846	0.00020105	-0.00151786	-4.43237e-06	4.35942e-05
LC.03.0003	0.064586	-0.00846675	-0.0317835	-0.0126766	3.07881e-06	-0.000822736	0.0290662	-2.71755e-05	-0.0963941	-5.20826e-05	0.00102258	-9.41825e-05	-0.00471691	0.02086	-3.51144e-06	-1.45226e-06	0.0343677	0.0261004	-1.26223e-05	0.00100956	4.22215e-05	-1.89042e-05	0.000598861	-5.25575e-05	0.0093816	-0.00402897	0.000631403	0.000411059	-0.00515589	0.00086796	-0.0296859	-0.00167732	-0.000351256	-0.0395369	-0.000916333	0.000133648	-2.61555e-05	1.21501e-05	2.40347e-07	-2.47432e-05	1.46902e-05	1.6796e-05	0.000100522	0.000179188	0.000115957	2.01966e-05	0.000723061	-2.76099e-06	1.06909e-05
LC.03.0241	0.0643154	0.00613548	-0.0167085	-0.0530821	2.55071e-05	-8.68768e-05	0.0535937	-0.000346102	0.0336986	-0.00111608	-0.0229957	-0.00830046	0.0253198	0.000490661	-4.37912e-05	-0.000235824	0.00254838	0.0336913	0.000113171	-0.00341185	-0.000280576	1.98835e-05	6.68184e-05	-0.000157676	-0.0149829	0.027839	-0.000610137	3.57789e-05	-0.0521348	-0.000145315	0.0150652	0.00257023	-0.00171344	4.6545e-05	0.00435701	-0.000130766	-7.2134e-05	-0.000564958	0.000111259	9.47562e-06	2.11061e-05	4.49312e-05	-6.3809e-05	-0.000414666	-5.36512e-07	2.26147e-06	0.00364813	6.62027e-05	-1.06797e-05
LC.03.0645	0.0642526	-0.0226188	-0.0294546	0.00328046	-2.0379e-06	0.000703844	0.00136879	3.58898e-05	-0.0297905	1.78897e-05	0.000901947	0.00314466	-0.0425533	0.000919604	-3.73837e-05	-0.0978017	-0.0028918	-0.0297957	9.13341e-05	-0.00314609	1.38457e-05	1.88295e-05	-0.0253609	0.00563631	-0.00134864	-0.00168221	2.38705e-05	-0.000121099	0.000922766	0.000111444	-0.00143397	0.00017108	-0.000670534	-6.39648e-05	-0.0368822	0.000412233	0.000136649	3.17874e-06	-3.33276e-05	5.21902e-06	0.00074903	-1.30866e-06	-0.00155319	-0.000997501	-0.000591519	1.40602e-06	-0.0554833	-0.00119223	7.61814e-06
LC.03.0599	0.0641616	-0.0065915	-0.000536265	-0.0728054	3.34919e-06	-0.0157408	-0.00058078	-5.13677e-06	-0.000670432	0.000219616	-0.000425051	-0.000127288	-0.12013	-0.0164043	-7.20527e-05	0.0286585	-0.0352493	-0.0215833	-0.000115573	0.0866652	-1.61724e-07	-1.9388e-05	0.00124087	-3.66986e-05	-0.0195365	0.126759	0.000186134	-4.3666e-05	-0.000156682	0.000189134	7.80431e-05	0.000347633	-0.0232962	4.90407e-05	-0.0182517	0.00092322	0.000136645	4.03565e-06	3.79243e-07	7.98021e-06	4.69056e-05	8.17035e-07	-6.8465e-05	0.0100194	4.4464e-05	3.87865e-05	0.00328033	6.32609e-06	9.22253e-06
LC.03.0475	0.063921	-0.012611	-0.0332362	-0.0223263	7.51764e-06	-0.0248366	0.00437665	-1.07394e-05	-0.00027534	-5.71121e-05	-0.00779258	0.0311028	4.38298e-05	-0.00352783	-0.000216942	0.000872091	0.0104053	0.0141833	0.0216954	0.000731766	-1.77043e-05	-1.03753e-05	0.00378431	-0.000234765	0.0598951	0.000633508	0.000307013	-3.30609e-05	0.00909608	0.000833984	0.000751504	0.000345757	-0.000806949	-0.000855742	0.0661634	-0.000853147	-0.000711612	-1.27806e-05	1.15571e-05	0.00020692	-0.000147663	-0.000165981	-0.0445602	-0.026811	-0.000872548	-6.10818e-05	0.00105826	-0.00013191	0.000482357
LC.03.0826	0.0639112	0.0124986	-0.0280317	-0.0410228	-2.67645e-06	-0.000543164	0.00016035	-2.0332e-05	0.104577	-0.00957382	0.00011196	-0.000954586	0.000405904	-0.00110055	-0.000180088	0.000857065	-0.000458768	0.0073708	6.43299e-06	0.00118123	6.12401e-05	0.000202529	-0.000636489	6.41647e-05	0.000583138	-0.000540938	0.000207082	-4.21757e-06	-0.000454282	-5.73888e-05	-0.000249163	-0.0260388	-1.708e-05	-4.3577e-05	0.0307309	-3.99945e-05	-5.67706e-06	1.30948e-05	-8.49376e-08	-0.000429782	8.4631e-05	1.28996e-05	0.00551492	-0.00180038	-1.96674e-05	2.04234e-05	-0.00725627	-6.4145e-05	-1.68342e-05
LC.03.0389	0.0638561	0.0230627	-0.036487	-0.029593	2.06272e-06	0.0118971	-0.0174928	-4.94065e-05	0.118576	-3.67596e-05	0.000182054	1.11636e-05	-0.000417158	0.00164024	2.01605e-05	-0.0237814	-0.0627129	0.0003757	3.31371e-06	-0.0295138	-1.46288e-05	1.07204e-05	6.40986e-05	-1.54762e-05	-0.00296245	-0.0311286	0.000124036	-7.90472e-06	0.000119816	-4.19379e-06	2.30505e-05	-1.48048e-05	-0.0379958	-2.25797e-05	-0.0121128	0.000284239	6.45239e-05	4.34493e-05	-6.4156e-07	-3.49858e-06	-2.75013e-06	5.78437e-06	-0.000305637	0.00257334	1.59207e-05	0.000127343	0.000198347	-7.77026e-07	9.56899e-06
LC.03.0028	0.0638161	-0.016041	0.000123374	0.00029356	-5.25996e-05	-0.000120938	0.0102407	-1.80713e-05	-0.0667558	5.87474e-05	9.66598e-05	0.0294378	9.76496e-08	0.0125744	6.69541e-06	0.000160615	0.052306	-0.000406484	-0.000105044	0.0176611	-2.18405e-05	-4.6308e-06	-0.000805013	-3.18208e-05	-3.01574e-05	-0.000111704	0.000134767	0.000355727	0.000376443	-1.68325e-05	-0.000783355	-0.000159725	-0.000165526	0.000159258	0.0191891	-7.15541e-05	-2.97484e-05	8.53182e-05	9.33021e-07	-1.03415e-05	-1.73751e-05	6.27507e-05	-5.53841e-05	-0.00665329	0.000118531	-1.83454e-05	-1.4418e-05	4.70863e-06	9.35847e-05
LC.03.0506	0.0636225	0.00234459	-0.000621692	0.0121309	1.96897e-06	-0.00489601	-0.00245894	0.000180856	0.000880332	0.000169248	-0.000556944	0.00229094	-0.000578606	0.0428671	-0.000188756	-0.0521629	0.00274777	-0.0524399	3.28222e-05	0.00140708	3.4006e-05	-4.45234e-06	0.00430511	9.59379e-05	4.19068e-05	-0.0114758	-0.00248915	0.000190052	0.00497032	0.00179558	0.000422335	-0.000104413	0.000239321	-0.000160719	0.0490373	0.000447095	-3.595e-05	1.32834e-05	-0.000761817	1.67818e-05	9.30527e-05	-1.12861e-05	0.00010121	-0.0038707	-0.000641533	3.9937e-05	0.0244019	0.000136562	-4.03513e-06
LC.03.0281	0.0634314	-0.0277085	0.000166031	0.0457166	5.83768e-06	-0.0143796	0.0162771	-2.71489e-06	6.40342e-05	0.000162831	-0.000432409	0.0395749	0.028675	0.0119509	-5.46281e-06	0.0110799	0.0546106	0.000847062	-2.61843e-05	0.000475847	1.44629e-05	-3.68602e-06	0.00373877	9.13431e-05	-1.16518e-05	0.000499855	0.000183051	5.37193e-05	-0.0772898	2.6049e-05	6.71057e-05	-0.00146526	-6.451e-05	-7.29553e-05	0.0107586	0.000640767	0.0177077	1.65315e-05	-3.09797e-06	-3.33544e-05	-0.000213133	2.89387e-06	7.59329e-05	-0.0213533	3.93796e-06	5.80836e-06	4.29577e-05	8.49315e-06	5.45347e-06
LC.03.0085	0.0633026	-0.000108167	0.000165247	-0.0228598	-1.05504e-05	0.0683742	0.0218531	-7.55705e-05	0.0497252	-6.71267e-05	-3.54412e-05	-0.0134156	0.000252415	0.0126789	1.87112e-06	-0.0271457	-0.0301937	0.000637211	1.14811e-05	-0.000309367	4.89367e-05	2.04404e-06	-8.8939e-05	-0.000201613	3.7488e-05	0.000523486	0.000257347	1.00228e-05	-0.021034	3.9539e-05	-4.99161e-05	5.91217e-05	2.2799e-06	-0.000164632	0.000172464	0.000540901	0.000121655	9.24231e-06	1.05564e-05	5.43986e-06	5.48363e-06	4.08418e-05	-4.83995e-05	0.000148137	4.73115e-05	-7.56017e-05	0.152799	-1.10862e-05	-2.30502e-05
LC.03.0175	0.0631723	-0.0217844	0.0692015	-0.0184614	-6.68624e-09	0.0674497	-0.0116489	-3.62422e-07	-0.0601337	1.39093e-05	-3.37222e-05	-7.31462e-05	-0.0187879	-0.00022256	-8.77256e-05	0.0229307	-0.0340233	-0.0569206	1.87414e-06	-0.00030504	-2.74157e-06	-2.26442e-06	-0.000414662	4.29148e-05	-0.0110109	-0.103627	0.000229112	-1.48648e-05	0.000754797	-1.57215e-05	0.0142447	-9.05293e-05	0.000289525	-4.76844e-06	-0.0157626	-0.0472715	-1.51865e-05	-3.15448e-06	3.38503e-06	-1.5294e-06	-9.17255e-06	-1.35445e-06	-3.41735e-06	0.0783521	-7.44347e-05	2.2664e-05	0.0540909	6.26166e-07	4.44094e-06
LC.03.0589	0.0631294	0.00609588	0.00108856	-0.00214614	-4.88181e-06	-0.0312108	0.0145063	2.76173e-05	0.0368624	0.000733084	-0.000158497	0.0171582	-0.000277218	0.00184585	-1.75272e-05	0.00497677	-0.0218165	0.0496955	-3.74376e-05	0.0027114	4.55474e-05	-1.73624e-05	-0.000413564	-0.00024106	0.0359826	0.0539408	0.000330795	0.000418746	0.000838678	-0.0514094	0.000104446	0.000215684	0.00392798	-0.00272463	0.0179987	-0.000336199	-0.000818188	-4.32832e-05	-4.68838e-07	1.89076e-05	-1.30947e-06	-1.342e-06	-0.000234238	0.00805257	0.000891234	-0.000162323	-0.00051655	-6.19419e-05	-3.91338e-05
LC.03.0029	0.0630144	-0.0176121	0.000298399	0.0188398	-1.34618e-05	-0.013448	0.0131913	-2.05378e-06	-0.0582477	-1.19572e-05	0.00014459	0.0358139	0.000226026	0.000156323	6.20777e-06	0.00075245	0.0581474	-0.0132896	-1.49795e-06	0.000324768	3.09635e-06	-1.76235e-05	-0.000166702	-4.06774e-06	-2.79824e-05	4.17517e-05	0.00172858	1.02167e-05	-1.47698e-05	-1.34178e-05	2.30155e-05	0.000204267	-3.55031e-06	-4.90367e-06	0.00409325	2.84851e-05	-6.68814e-05	8.13368e-06	1.38532e-07	-1.99558e-05	1.38341e-05	1.03436e-05	9.73816e-06	0.000141462	2.84313e-05	1.45529e-06	-4.81098e-05	1.98505e-05	2.05973e-05
LC.03.0595	0.0629915	0.0334848	0.000147674	-0.00134782	-2.80647e-07	-0.0207065	-0.0441326	-1.05742e-05	-0.0665248	0.000141244	0.000280734	-0.0142888	-0.0816585	-0.00834667	0.00017937	0.0838148	-0.0564436	0.000883006	-7.15278e-05	0.0526943	-8.46903e-06	-1.95088e-06	0.000205123	-0.000256529	-7.61335e-05	0.110965	0.000112666	-4.60967e-05	-0.000318469	1.65177e-05	0.0579434	0.000110629	-0.000103324	5.89542e-05	-0.0243436	-0.000986466	0.00500774	0.000103856	-5.63003e-06	1.0689e-05	3.55154e-06	2.48304e-07	-0.000486565	-0.000957366	-9.15883e-05	1.44047e-05	0.0537369	8.48256e-06	1.21281e-05
LC.03.0600	0.0628786	-0.00973924	-0.0680215	-0.0275276	-0.0194172	-0.0133624	-0.0126931	-7.31729e-05	-0.0288854	0.000309825	-0.00069957	-0.00278895	0.000820982	-0.0100741	6.46599e-05	3.98342e-05	0.0267866	-0.00479303	2.36339e-05	0.00157183	-2.71507e-05	-9.61022e-06	0.000362289	-5.13443e-05	9.47364e-05	-0.00210828	0.000150413	-6.70616e-05	-0.173355	1.23721e-05	0.000960999	0.00200377	-7.19028e-06	7.13141e-05	0.00542283	0.0004629	0.000112425	-5.24529e-05	2.54198e-06	-1.50372e-05	8.26497e-05	-2.96127e-06	-3.88241e-05	-0.0612108	3.43326e-05	1.06773e-05	0.000127059	0.000104863	-2.94054e-06
LC.03.0477	0.0628642	0.0212176	-0.000367538	-0.037375	1.1606e-06	-0.00047305	-0.0411077	0.0135054	0.103642	-0.000104765	0.00166131	-1.31551e-05	-0.0286631	0.00395119	-6.19803e-06	0.000216267	0.0344905	-0.00132286	-2.11911e-05	0.0383667	-2.41816e-05	-4.87085e-05	0.000599864	-6.55457e-05	-0.0200055	-0.00478179	-0.000177316	9.60755e-05	0.000444469	1.97836e-06	-0.000395958	-0.000106641	0.120056	2.14211e-05	-0.0209765	0.0209703	-4.90624e-05	-1.14123e-05	-4.51776e-07	9.82011e-07	1.7261e-05	3.42928e-06	-0.000288266	-0.00139561	8.38336e-06	2.06703e-05	-0.0739826	1.7858e-05	4.70147e-06
LC.03.0684	0.0626767	0.0145655	-0.0343724	0.00433554	-1.13959e-06	-5.56527e-05	-0.0532362	-2.27992e-05	-0.0570877	-0.000387791	-0.000407137	0.0100932	-0.0281529	-0.000150089	0.000810533	0.0722701	-0.0193199	-0.00127204	0.00115836	-0.0165503	-4.5852e-05	-1.18409e-05	0.00154148	-5.78043e-05	0.000575501	0.0116235	-0.000130739	-0.000117813	-0.0481338	0.0001287	0.0018213	9.66979e-05	-7.14451e-05	-0.0582002	0.0303768	0.000765322	4.28355e-05	3.27417e-06	-8.70142e-05	2.74961e-05	0.000221585	4.30569e-05	0.00017255	-0.0786419	-3.75388e-05	0.000222598	0.00225977	1.71824e-05	3.75169e-05
LC.03.0489	0.0625902	-0.0043054	-0.0179722	0.0239318	-2.03687e-05	-0.0290325	-5.82375e-05	-9.70869e-06	-0.109053	-2.2776e-06	0.0024591	-0.0175963	-0.00305895	0.001049	7.40181e-05	0.0558357	0.000863428	-0.00448703	-3.30944e-05	0.00485468	9.8904e-05	0.000285312	-0.000359589	-0.000950086	0.000663695	-0.0238394	0.000793738	-6.16132e-05	0.000837903	-7.08681e-05	8.90802e-06	8.49963e-05	-0.0125892	-9.97945e-05	-0.0319933	0.000815956	-0.000161343	0.000236242	-9.47457e-06	-1.34999e-05	0.0305187	-1.66732e-05	0.00264203	-0.0243326	-4.78213e-06	-0.00023915	-0.0121372	-6.58572e-05	9.34893e-05
LC.03.0196	0.0621388	-0.0250803	0.0599651	-0.014456	-4.1569e-07	0.062701	-0.017821	8.65653e-06	-0.0749936	3.5015e-05	0.000114108	0.000985485	0.0439869	-0.000208948	7.84462e-06	0.0210557	-0.0664233	-0.0461965	3.18382e-05	-0.000368787	-1.5032e-05	-3.97379e-06	4.52602e-05	-2.26213e-05	-0.00107483	-0.04741	-3.72719e-05	-4.47259e-05	0.0118674	2.80631e-05	0.000128967	-0.000179795	-2.30182e-06	2.95768e-05	0.0122577	-0.0233172	7.80088e-05	4.85615e-06	-3.48089e-06	-9.15682e-06	2.06164e-05	5.73192e-07	8.17352e-05	0.0580855	-2.39356e-05	-3.24706e-06	-0.060313	6.21504e-06	0.000175655
LC.03.0111	0.0620629	0.0106377	-0.000375481	-0.00110374	-3.5691e-06	-0.000251924	3.14893e-05	6.47871e-06	-0.115204	-0.00026056	0.000174086	0.000161881	3.08656e-05	-0.017968	-5.05863e-05	0.0873794	0.000943046	0.00694601	-1.20885e-05	-0.000924519	-4.73093e-06	-0.000252487	0.000227246	7.95112e-06	-6.36497e-05	-0.000430448	-0.0425337	0.000683633	0.0685197	-0.000267387	0.000404014	4.23321e-06	-0.150191	7.68249e-05	-0.0401746	3.68561e-05	-0.000395567	-2.48858e-05	2.84125e-07	2.97399e-05	-0.000197824	-3.47788e-05	-0.0013417	-0.00300755	2.14774e-05	1.30275e-06	0.000123182	0.0259751	3.22911e-06
LC.03.0118	0.0616493	4.93708e-05	7.6614e-06	-0.0279206	-4.23498e-07	0.0784452	0.0117727	-4.57947e-05	0.0311135	-2.31636e-05	-0.000220606	-3.09769e-05	0.0650736	0.0151969	5.85039e-05	-0.017863	-0.0611185	3.71898e-05	-1.0524e-05	0.0089223	9.90185e-07	-1.18831e-05	-0.000127226	-7.16953e-06	-0.000429189	0.0502613	0.00025423	7.53139e-05	-0.0367843	-5.30635e-06	-4.91436e-05	0.000146185	3.47352e-06	2.44736e-06	0.00158766	0.0198181	0.000237996	2.7943e-05	1.27429e-06	1.60085e-06	-9.09552e-06	1.17582e-06	-0.0109001	0.025798	-6.61245e-06	-6.53622e-06	0.0198308	-4.21678e-06	1.66055e-06
LC.03.1055	0.0616253	-0.00639078	-0.0461223	0.0283812	3.23317e-05	6.79573e-05	0.00255262	-5.89661e-05	-0.0243787	2.41632e-06	-0.000415074	-0.035182	-0.000532697	-0.0439725	0.000148433	0.000345099	0.000370695	0.0240022	-0.036997	-0.00251207	-2.85944e-05	7.02349e-05	0.0176508	0.000262271	0.000481149	-0.00326404	0.000406789	3.44432e-05	-0.0586342	0.00187286	-0.0043556	-0.00169869	0.000523917	-0.0420521	-0.00285443	0.0212504	-0.000110335	-0.000146893	-3.02653e-05	2.48917e-05	-0.000616778	-1.38246e-05	-0.000577562	-0.000933473	0.000128784	2.8522e-06	0.00208255	-1.11957e-05	6.18989e-05
LC.03.1008	0.0614854	-0.00141257	-0.0275823	-0.0457589	8.90913e-06	0.00888129	0.00634593	-3.38029e-05	0.0970892	-0.00206265	-0.00213799	0.00418664	-0.00621913	0.00208631	6.70757e-06	-0.000611707	-0.00142877	0.00126331	1.18029e-05	-0.008744	-4.80815e-06	2.47899e-05	-0.00135095	8.6857e-05	0.000195659	-0.000879628	-4.23493e-05	-0.000848027	0.000703102	0.000448954	-0.000439518	-0.0014327	0.00107482	-0.000322767	0.00269918	0.00178143	2.84449e-05	-1.59382e-05	1.4291e-06	-5.54267e-06	2.51851e-05	2.62648e-05	0.000480773	0.0235543	-0.000412209	1.4986e-05	0.00665897	-1.21792e-05	-1.64535e-05
LC.03.0174	0.0614042	-0.00817772	-0.00672286	0.00152812	-1.27347e-05	-0.0196277	0.0238301	1.22543e-05	-0.126607	0.000101323	-0.000161775	-0.00241207	-0.00017409	0.000429097	-3.89314e-05	0.0466487	0.0268907	0.041739	1.40596e-05	-0.000336651	0.000196211	7.99641e-05	-0.00149443	-4.24875e-05	-1.69197e-05	0.00204002	-0.02363	-0.000120894	0.0591081	-0.00015697	-0.000120824	0.00421299	-0.0978555	-0.000118586	-0.0362268	0.00013071	-0.00109549	0.000419281	0.000154789	-1.87741e-06	-0.000128155	5.96863e-06	0.000224282	-0.000622349	-0.000228851	1.22628e-05	-0.000425439	-2.37344e-05	8.47621e-05
LC.03.0217	0.0614027	-0.00631095	-0.000703892	-0.00780195	-9.15044e-06	-0.055405	-0.000448846	-9.24076e-05	0.0414972	2.12486e-05	-0.00112213	-0.00299417	0.00999178	-0.000109595	0.000115187	0.00110734	-0.0406202	0.0113689	-2.58825e-05	0.0149987	0.000302385	3.04371e-06	0.000749193	-0.00157384	-9.06507e-05	-0.000910326	-2.35905e-05	0.000505334	-0.000667419	-0.00114734	0.00232533	-0.00196116	0.00187097	-0.000415322	-9.91005e-05	-0.000106849	-0.00790353	1.97175e-05	2.69841e-05	-3.05977e-05	0.000175986	6.80454e-06	-0.00582651	-0.00598529	0.000188409	-0.00116486	0.00149295	-2.34358e-05	-0.000288058
LC.03.0339	0.0610465	-0.020924	-0.000215779	0.027932	-1.08758e-07	3.93958e-05	0.0360138	-0.000237321	0.018573	-5.42076e-05	-0.000108454	-0.0322496	0.0247694	-0.000414938	1.45316e-05	1.11322e-05	0.0412188	0.0244535	0.0219549	-0.0111339	-1.13038e-05	9.82101e-06	0.01448	-0.000403126	-0.000363588	-0.000311107	-3.00643e-05	-4.00258e-05	-0.15784	-0.000140487	-8.25991e-05	-0.000106234	-0.000631441	-0.000112031	-0.0178714	-0.0155555	0.000116777	-2.80181e-05	-3.60277e-06	4.02073e-06	6.34443e-05	8.5193e-07	4.50826e-05	-0.000975388	3.61825e-05	1.7988e-05	0.0486042	-5.13273e-06	3.84031e-05
LC.03.0604	0.0609756	0.0195506	-0.0267481	-0.00676037	2.80822e-06	5.31447e-05	0.0319515	0.000229138	0.0259249	-0.000165613	-1.53912e-05	-0.0142393	-0.00274923	0.0056783	-0.000114546	-0.0480984	0.000409533	0.047743	9.39455e-05	-0.0158139	-4.37869e-05	0.00027942	0.00113164	0.0572563	-0.00156429	0.0554972	-0.000791969	-0.000226085	0.0115549	0.0385606	0.00147573	0.00192579	0.000365241	-0.000272918	-0.0318381	-0.000496027	-0.00203186	7.50986e-06	9.54273e-06	1.56997e-05	6.53889e-05	1.68478e-05	-0.000228184	0.00142157	0.000117673	-9.57236e-05	-0.000280401	-7.1999e-05	-0.00228887
LC.03.0132	0.0607368	0.0153836	-0.000183686	-0.0315261	5.00464e-06	-0.000435878	0.0254089	1.47385e-05	0.0159052	0.00085692	0.000365759	0.00604907	-0.000106203	0.00100843	-0.000105495	0.0594889	-0.0021295	0.0736582	-0.000250421	0.000546283	0.0226117	1.41247e-06	-0.000380131	-0.000511668	-0.000601726	0.0793782	-0.000854147	-4.14473e-05	0.00136372	-0.0436638	0.000549503	-0.00923335	-0.10443	8.22345e-05	0.0549116	-0.00538341	-0.000312515	-1.02433e-05	8.08217e-07	-1.08808e-05	-0.0340863	-2.35834e-05	-0.000108991	0.0471094	4.58728e-05	-0.000409961	-0.00680543	1.30758e-06	5.32226e-05
LC.03.0344	0.0604968	-0.00211186	-0.000216344	0.000587243	-7.08234e-07	0.000188795	0.00163967	-3.46365e-05	-0.042406	0.000133161	0.00133125	-0.000865739	0.00122547	0.0104246	2.65172e-05	-0.000173569	-0.162144	-0.0236015	0.000105465	-0.000186725	4.07346e-07	6.76993e-06	0.0106953	-3.77754e-05	0.00030746	-0.00429046	-6.75088e-05	-1.49206e-05	0.000522171	-0.000189012	-0.0147628	-0.00194482	0.0172211	-0.000278877	0.00262071	0.0210559	-0.000627186	-2.05474e-05	-1.47626e-06	-3.49601e-05	-1.02143e-05	-6.50902e-05	0.0344394	-0.0547716	-5.25307e-05	0.000128516	-0.000124459	-1.66129e-06	4.69411e-05
LC.03.0704	0.0603598	-0.0154474	-1.52237e-05	0.0279332	8.10582e-06	0.029408	0.0266479	-0.00810413	-0.00358588	-0.000847429	0.0011308	-0.0410962	0.042882	-0.0205705	0.00021082	-0.000886864	-0.0427625	0.0307517	0.0202564	-0.00277631	2.40425e-05	5.92808e-05	-0.000522495	-7.85462e-05	-0.00022576	0.0139339	0.000258755	-0.000122357	-0.105714	0.000137851	-0.000814272	-0.0379288	-7.27771e-05	-0.000456676	-0.0527581	8.38783e-05	-9.02056e-05	1.62894e-05	2.73284e-06	-7.72615e-06	0.000105512	2.84738e-06	0.00131769	-0.000200878	-9.83103e-05	-9.45249e-05	0.000592994	-4.90799e-05	-0.000620129
LC.03.0747	0.0603355	-0.0143589	-0.0121836	0.0296091	-0.00052889	0.000346088	-0.000790714	-0.000109267	-0.00458873	0.000695891	0.00120802	-0.0443119	-0.0303635	-0.00443833	0.000232324	0.0344556	-0.00573445	-0.00172228	0.000696794	-0.00206438	0.0296624	-1.66545e-05	7.87716e-05	0.000113831	-0.0297476	-0.00306317	0.00167305	9.02014e-05	0.000257777	-0.00256126	-0.00269499	0.000461193	0.0103457	8.37154e-05	0.000392577	0.0373369	-0.000399313	4.01232e-05	0.000344424	-5.34731e-05	-4.67582e-05	-2.1635e-05	0.028745	-0.142714	1.26467e-05	-7.84827e-05	-0.00163789	7.59145e-06	-0.00113596
LC.03.0676	0.0600329	0.0285231	-0.0526571	-0.00011061	1.16049e-05	-0.000152843	-0.0459131	-1.06031e-05	-0.0408661	-1.67605e-05	0.0110767	-0.000526442	-0.0399582	0.000488355	9.69607e-05	0.0758887	-0.0558277	-0.00440358	0.000204283	-0.00105403	-0.000421986	0.000110856	-0.000543204	-3.70188e-05	0.0004566	0.00192561	-4.36029e-05	-0.000467844	-0.0406436	0.00021266	0.0340799	-0.000303923	-0.000144645	-0.0653935	0.0286394	-0.000245887	-5.2319e-05	1.41669e-05	-1.69895e-05	-6.06142e-06	-0.000117565	2.00222e-05	0.000309901	-0.0409093	-0.00105611	0.000252161	0.00329914	5.39084e-05	1.99909e-05
LC.03.0410	0.0599512	-0.0159132	-4.07996e-05	0.020133	-0.000117211	-0.00623377	0.0175661	-5.37734e-05	-0.000733093	0.000132475	0.000214015	0.0438877	0.0724912	-0.00171246	0.00232672	0.0256802	0.00248001	-0.00147125	-0.000111295	-0.0607485	0.000210563	-0.000333616	0.000352441	-0.000325983	3.84198e-05	-0.00168926	0.0167573	0.000153205	0.0481466	0.000100688	0.000592073	0.00244839	0.0426411	-2.34077e-05	0.00450661	0.000811534	0.000290855	5.20867e-05	-1.78314e-05	-2.71626e-05	-0.000111607	-9.88776e-07	0.000292768	-0.0537004	-6.17753e-05	-5.33365e-05	-0.0186223	5.66396e-05	3.32189e-05
LC.03.0152	0.0594067	-0.0117243	-0.000906643	-0.00808214	-7.76598e-06	-1.58258e-05	-0.0265365	2.4418e-05	-0.0969765	0.000687516	-0.000100011	-8.68465e-05	-0.000809585	-0.00168246	-1.19693e-05	6.90924e-05	-0.000447575	-0.000113419	1.47949e-05	0.0343934	-1.29569e-05	3.36982e-05	-0.000314853	-0.00062447	-0.000182304	-0.0027106	-5.07259e-06	-0.000252697	0.000994033	-2.04676e-05	-0.0458775	0.00155939	-1.79211e-05	7.33305e-05	-0.05129	-0.000329187	0.00029416	7.96991e-05	1.31856e-05	8.23812e-06	-2.63671e-05	8.67509e-06	-0.0223269	-0.0394683	-0.000136788	-0.000144059	-0.00231161	-1.56604e-05	-1.69347e-05
LC.03.0498	0.0592335	-0.0220694	0.0900903	-8.49916e-05	3.22316e-06	0.0561468	-0.0209515	6.49437e-05	-0.0757155	-4.3821e-05	2.42812e-05	0.031424	0.033912	-0.000107021	2.65942e-06	0.0256131	0.000207548	-0.0399552	4.45181e-06	-0.000677162	-8.82119e-06	1.35401e-05	-7.79204e-05	1.50064e-05	2.9282e-05	-0.0644053	-1.92548e-05	-6.65935e-05	0.0329809	1.14931e-05	0.000204602	-2.21492e-05	-8.91754e-07	-8.43204e-06	-0.00093264	-0.0471527	0.000204552	-1.06166e-06	-1.34268e-06	2.46222e-06	-1.43202e-06	-7.47585e-08	0.000114176	0.000968186	-8.44685e-06	-1.8729e-07	-0.000204381	-1.04527e-05	2.69882e-06
LC.03.0017	0.0591743	0.0155356	0.0410054	0.0374996	-1.57891e-06	0.0912832	-0.000602265	-2.27171e-05	0.0224473	9.77912e-05	-2.56254e-05	0.0308384	0.000186003	0.00915473	8.755e-06	-5.05221e-05	0.0548528	0.0158506	-0.0117682	0.0193521	3.61137e-06	-2.61448e-05	7.12001e-05	-2.44469e-05	0.0110203	0.0923187	-0.00152941	1.44268e-05	0.000601921	-0.000155009	-2.80524e-05	-0.000901142	0.0465847	7.57473e-05	0.0167318	-0.000586157	-0.000204355	3.84967e-06	-4.92586e-06	3.48248e-06	2.0924e-05	5.17014e-07	-4.00296e-05	-0.0407646	-3.85915e-05	8.20877e-07	0.0587826	1.10065e-05	1.11825e-05
LC.03.0022	0.0590091	0.0106008	0.0377026	0.0226816	3.62191e-07	0.094392	0.0101013	1.53565e-05	0.0341931	1.9264e-05	-4.73637e-05	0.0145492	-0.0175919	0.00453729	-1.16617e-05	1.34018e-05	0.0311841	0.0153557	-1.23767e-05	0.0225913	-2.31718e-06	-9.41442e-06	0.000820259	-1.84865e-05	0.000197069	0.0781012	-5.25368e-05	0.000111107	-0.000435317	-1.28859e-05	-0.0127958	-2.61348e-05	-2.91606e-05	2.35692e-05	0.00214907	0.000112471	-3.0687e-05	2.58148e-06	-6.55641e-07	2.44612e-06	0.000533374	-1.95547e-05	6.37616e-05	-0.0402849	5.04713e-06	-2.90859e-06	0.134641	-7.54245e-06	4.53672e-06
LC.03.0100	0.0589337	0.0159983	6.96276e-05	5.37002e-05	-3.04254e-06	-2.96578e-05	-0.00449594	4.65344e-05	0.000444943	5.61231e-05	0.00175575	-0.00335913	-8.95519e-05	0.0534548	1.97034e-05	-0.134855	0.0205707	0.000524888	1.96751e-05	-0.0337317	-8.26706e-06	0.0208003	0.000159707	-3.44502e-05	-0.000171596	-0.0248746	-0.00251588	-2.38985e-05	-0.000700057	-4.71551e-05	0.0978583	-0.000177841	-0.0154721	5.74909e-05	0.00777714	0.000129792	0.00229593	1.00295e-05	-3.41458e-06	-1.8527e-05	-1.42625e-06	-4.66554e-05	2.76895e-07	-0.00250354	-0.0025736	-9.56176e-06	-0.000799176	3.89391e-05	0.00231966
LC.03.0341	0.058765	-0.0222506	0.0520148	-0.0276034	-3.78134e-06	0.0480358	-0.00138257	-0.000161756	-0.0513011	2.55333e-05	0.000362396	0.00189379	0.0876231	0.000234254	1.73154e-05	-0.000205959	-0.0287896	-0.0471815	-3.76689e-05	0.00107086	3.7466e-07	-1.67023e-06	-5.76674e-05	-1.28779e-05	-0.00152845	-0.10483	-9.0445e-06	2.67438e-05	-6.49785e-05	2.14887e-06	0.0196786	-0.00224978	0.000970229	4.76711e-05	0.000142826	-0.0578097	-8.66487e-06	-8.14508e-07	-2.08348e-06	-2.26052e-05	-0.000150338	-8.66588e-06	-0.000218593	0.0938401	-1.75482e-05	-4.89312e-06	-0.0270276	4.03465e-05	1.70664e-05
LC.03.1045	0.0587337	-0.0228485	-0.000310249	0.0140465	4.78842e-06	0.00104976	0.000964534	0.00126906	6.12298e-05	0.000263786	0.00132001	0.0616887	0.0469537	0.00047114	-0.000180468	-0.0327397	0.0446326	0.0413323	0.00010757	-0.0104465	4.39591e-05	-1.67781e-05	-0.00343885	9.84809e-05	0.000165857	-0.00161203	0.036863	-0.0228506	-0.0698893	-0.000330588	-0.0225315	0.000162897	0.000179131	-0.000146555	0.00687633	-0.000149737	-0.000340038	-0.000139528	1.88711e-06	-1.21066e-05	-3.39706e-05	-8.15922e-06	0.000583253	0.0469663	6.65185e-05	9.61835e-05	0.00100103	-9.83704e-05	4.08743e-05
LC.03.0593	0.0586944	-0.0224888	-0.0169474	0.0286652	1.73078e-06	4.45427e-05	0.0237187	-2.59825e-05	0.00259797	-7.15042e-05	0.000467147	-0.0120463	0.0776718	0.0119025	-9.38886e-06	-7.93525e-05	-0.0632461	-0.0347866	-0.017669	0.03363	-1.74516e-07	1.09347e-06	-0.00203174	0.000935416	0.000370401	0.00373475	0.000123261	-9.14784e-06	-0.103459	8.96653e-05	-0.0306258	5.31587e-05	-0.000140391	-0.000406139	-0.0476974	0.000323165	1.14571e-05	1.18801e-05	-3.26202e-06	-3.86503e-06	-0.000692997	8.9266e-06	0.000473259	0.0952839	6.58444e-05	-1.28024e-05	-0.00139743	0.000113144	-4.43141e-06
LC.03.0711	0.0585724	0.0112511	0.0146635	-0.064133	-7.7577e-06	-7.39969e-05	-0.0392311	-3.72382e-05	0.0782068	-0.000570419	-0.000680376	-0.00707177	-0.0117108	0.00213291	-1.55123e-06	0.00142643	-0.0645734	-0.00527128	2.21355e-06	0.105107	-2.02949e-06	-2.26488e-06	0.000346256	-7.64392e-05	-0.00063566	0.000515108	-0.000860663	0.00023235	0.00127926	-0.000786009	-0.0317103	0.000204169	0.000786304	5.01154e-06	-0.030391	0.021466	-5.44387e-05	-1.37831e-05	3.86594e-06	-5.01837e-06	-4.97411e-05	1.92445e-05	0.000252827	-0.0018278	1.67e-05	-2.29742e-05	-0.0952385	3.08325e-06	-7.4397e-06
LC.03.0503	0.0582269	-0.00133753	0.000280223	0.0122011	4.77376e-07	-0.0214832	-0.0211105	-0.0205293	-0.0125248	-0.00214637	-1.41478e-05	0.00176845	0.00074261	-0.125528	-3.82957e-06	-0.12499	-0.0193057	-0.00313748	1.03655e-05	-0.000637504	-5.64039e-06	1.68446e-06	0.00086254	1.13902e-05	1.64383e-05	1.57525e-05	0.00130605	-0.000272911	0.00581688	0.000202992	0.00187897	1.32598e-05	0.000181858	-0.000569759	-0.0030815	0.000759671	8.46222e-05	-5.42415e-06	7.29527e-07	-2.99965e-06	-5.31908e-05	2.92747e-05	6.62681e-05	0.0263822	0.000662554	-3.16187e-05	-0.00332284	-4.87202e-05	6.1832e-05
LC.03.0205	0.0582193	-0.0158622	-0.0494139	0.00280876	-4.51032e-06	0.000171958	-0.00482265	0.000115569	-0.0198884	-7.79516e-05	-0.00298644	-0.00084747	-0.0405576	-0.101431	3.09459e-05	-0.0994222	-0.0254149	-0.0300496	-5.39067e-05	-0.000690052	1.98131e-05	-4.933e-05	-0.003554	0.00134887	-0.000350305	0.000311988	-2.78063e-05	-6.2034e-06	1.45342e-05	3.92255e-06	-0.036344	-0.000712703	-0.000146395	0.000118286	-0.000551757	2.26642e-05	0.00091271	-0.000113286	-7.95041e-06	1.27555e-05	-3.13846e-05	1.40019e-05	-6.99524e-05	0.000949394	0.00025541	8.14979e-05	-0.010149	-0.000386188	8.61275e-06
LC.03.0493	0.0580533	-0.000923871	-1.74187e-05	-9.81032e-05	-9.88274e-06	-0.000891286	0.0117401	-4.20997e-05	-0.0394089	0.000693334	0.000279439	-1.91612e-05	0.00563048	-0.00112508	-1.30483e-05	0.000151143	-0.090493	-0.0219855	1.72993e-05	-0.00372329	-1.85789e-06	-7.82957e-06	0.000497053	-0.000141217	1.92147e-06	-0.0400753	-0.000141458	-4.90064e-05	0.000144551	-7.00849e-05	0.00072661	-0.00189383	0.0218415	-0.000785996	0.0298115	0.000482627	-3.86447e-05	5.97607e-06	-4.51183e-06	-3.42113e-05	0.00012221	1.05042e-06	0.0371069	-0.0567417	6.50777e-05	0.000423572	0.00104554	5.81624e-06	3.89673e-05
LC.03.0244	0.057983	-0.0506673	0.0531448	-0.000236472	-3.01639e-06	0.0356775	0.029131	7.71276e-05	-0.000178445	-5.07628e-05	-0.000107549	-0.0182986	0.00118784	-6.68883e-05	-5.38787e-05	0.00262116	0.00375929	-0.0285008	-0.00108773	-0.00680036	9.96466e-06	1.16529e-05	0.000170547	4.54081e-05	0.000460015	-0.0652911	-0.00103401	-2.80827e-05	-0.0892749	4.30385e-05	0.000391681	-0.000928611	0.000280098	-0.000138307	-0.00100367	-0.0314581	-0.00027967	-1.29788e-05	4.63535e-07	-1.23189e-06	1.17407e-05	-3.36028e-06	0.000135786	0.0787337	2.53629e-05	6.86059e-05	0.000485694	-0.000101224	1.47114e-06
LC.03.1077	0.057954	-0.00711537	-0.0212615	-0.00773639	-1.03243e-06	0.000444727	-0.00280437	-4.14902e-05	0.000779475	0.00197511	0.00177843	0.0150902	0.054863	0.00566273	8.76981e-06	-0.00281951	-0.129866	-0.0521738	-2.90707e-06	0.00186723	7.63054e-06	9.13679e-05	0.00114976	-0.000294366	-0.000271022	0.00190145	-0.00049701	6.21282e-06	0.00315637	0.000889028	-0.012946	0.00059155	-0.063016	4.12373e-05	0.0339672	-0.00171115	-0.000892027	6.88905e-05	-3.47958e-06	-2.99944e-05	-2.11832e-05	5.06487e-06	-0.000468089	0.0594816	-2.32213e-05	-4.30385e-05	0.00130285	0.000372169	-3.77115e-05
LC.03.0473	0.0578606	0.018673	0.0183597	0.0411825	2.36036e-05	0.0711067	-0.00100048	1.28284e-05	0.00527461	0.000190186	-0.00122885	0.00188381	-0.0338071	0.00150304	9.52553e-05	-0.000368376	0.0401374	0.0058828	2.86662e-06	0.000431852	-4.927e-05	-0.0283092	0.00215517	-0.000320579	-0.000410678	0.070154	0.000989959	-6.084e-05	-0.000357985	0.000451893	0.000706436	0.000123753	0.00327002	-0.0357541	0.00540264	0.0274062	0.000363491	-6.17029e-06	-1.02226e-05	-1.21018e-05	0.000350921	-2.80478e-06	0.000805255	0.0345632	7.03916e-05	0.000179816	0.00714134	8.03214e-05	7.27334e-05
LC.03.0858	0.0578355	0.010496	-0.00117817	0.0135428	-2.22022e-05	-0.000274337	-0.0717722	-0.000114919	-0.0692667	0.000487797	0.000410949	-0.0292334	-0.00259109	-0.0216063	-0.000186581	0.0490191	-0.00140805	0.00190437	3.16704e-05	0.00726516	-2.68488e-05	0.000237925	-0.000217741	-0.000281607	-7.73964e-05	0.00139607	-0.000282248	-9.45461e-05	0.00180872	0.00123504	0.00273136	-0.00012811	-0.0294946	-0.000487348	-0.0442725	0.000108562	3.23599e-05	1.04736e-05	-0.000138002	0.000105551	0.0140577	-3.97102e-05	0.00364435	-0.0034687	0.000816923	-3.64642e-05	-0.0030723	-6.77419e-07	0.000155972
LC.03.0722	0.0576622	0.0427345	0.000390957	0.023749	1.63268e-05	-6.18722e-05	-0.0491302	-7.6201e-05	-0.0924699	9.43829e-05	-0.000999681	-0.00616976	-0.0285942	-5.59091e-05	4.30135e-05	0.0871406	-0.0871157	0.00107819	-3.69086e-05	0.0304407	1.85567e-05	-2.94952e-05	-0.00113904	-0.000192473	0.00113361	0.0556309	0.000321133	2.941e-05	-0.00995222	4.19009e-06	0.0749778	0.000238531	-0.000157077	-3.66918e-05	-0.000242394	-0.000345483	-5.03907e-05	5.17408e-05	-4.95655e-05	2.65034e-05	0.000106267	3.21533e-06	-0.000555175	0.00347882	-8.96812e-05	-2.1647e-05	0.00687916	-8.91961e-06	0.000127006
LC.03.0677	0.057647	0.0383613	-0.0255514	0.0011214	1.03323e-05	-0.00199368	-0.0446006	7.03909e-05	-0.0409394	-0.000148997	0.00204052	0.0392267	-0.0657152	0.00119359	3.01377e-07	0.0707803	-0.00573531	-0.00248893	8.74543e-05	0.015513	2.03512e-05	-3.63998e-05	-1.43996e-06	0.000144643	-0.000442883	0.00416512	0.00238737	-0.000120956	-0.00249254	-0.000123312	0.00544591	0.000441436	0.000290365	-0.0886746	0.0235305	-8.6908e-05	-4.06029e-05	3.51545e-06	-1.95402e-06	-9.43864e-06	0.000102095	6.86625e-05	0.000238464	-0.0869807	0.000914164	0.00227135	0.0796566	0.000231641	2.56867e-05
LC.03.0729	0.0576346	0.00442762	-0.00132284	0.000780642	-7.38031e-06	-0.0187703	-0.00383528	-0.000159369	-0.0824	-0.000164743	0.000889782	-0.00178262	-0.00153709	0.00256544	0.000161229	0.0769429	0.000326685	-0.0398907	7.8193e-06	-0.0139944	4.10691e-07	-6.69401e-05	0.000526323	-0.000331451	-0.000173768	-0.0550663	-0.00984816	-8.63431e-05	0.0497411	-0.000181182	0.000817682	0.00133901	-0.0107137	0.000138983	-0.0901725	0.00508749	0.000264982	-9.90142e-05	2.11142e-05	5.3535e-05	0.0249836	-0.000315841	-0.00023096	-0.046847	0.000187515	4.562e-05	-0.074013	3.68233e-05	8.75355e-06
LC.03.0049	0.0568586	-0.0126708	0.0116936	0.030396	-0.0118929	-3.25334e-05	-0.00168503	9.90634e-06	-0.04895	-3.10793e-05	4.82608e-05	0.0166015	6.50752e-05	7.30318e-05	-8.83114e-07	-0.000103922	0.0613492	-0.0132957	-1.49249e-05	0.0140459	2.01745e-06	-1.17203e-05	-4.72777e-05	1.96754e-05	-0.000362703	0.00356532	0.00272619	2.37827e-05	-1.95663e-05	-0.0165137	0.0214029	-8.0591e-07	0.0167038	-2.05535e-05	0.0247512	2.77048e-06	3.68806e-06	4.9448e-07	1.97149e-06	-3.58626e-06	-8.11705e-05	-4.35691e-07	5.45785e-05	-0.0280676	8.60959e-06	4.51244e-06	-0.0031883	8.20102e-08	-5.83722e-06
LC.03.0505	0.0567458	0.0238725	0.0430558	0.000837688	1.01965e-05	-7.28604e-05	4.14989e-05	2.90525e-05	0.000246237	0.000149158	0.000558602	-0.000777533	-0.00642538	0.0467078	0.000199169	-0.12537	0.000354516	0.0115609	-9.11694e-06	-0.0210362	-7.58551e-07	-3.22979e-06	-0.0113605	-2.67611e-05	-0.000398012	0.0177188	-8.66358e-05	2.11108e-05	-0.000213956	-2.73166e-05	0.105941	-0.000955265	2.62035e-05	-5.45504e-05	-0.0247551	-0.037292	3.25312e-05	-3.34718e-06	-1.46153e-06	3.57409e-06	-3.51983e-05	-1.4764e-06	0.000329128	-0.0490832	-6.06926e-05	0.000258915	0.00196015	2.04625e-05	7.11572e-05
LC.03.0416	0.0565144	0.0160909	0.0342155	-0.00594643	3.51799e-06	-1.38127e-05	-0.00100185	-1.04088e-05	-0.000395404	4.9802e-05	0.0160047	-0.0155578	7.66828e-06	0.0239631	-9.88867e-06	-0.13761	-0.0212153	-9.87694e-05	-5.67477e-05	0.00223086	-4.3114e-06	1.94476e-05	-0.000109208	-0.00023909	0.000108452	0.000166693	-0.000225083	1.79876e-05	-0.0014772	2.31759e-05	0.0675799	7.59886e-05	-6.98884e-05	5.41715e-05	-0.000226021	-0.000130388	-4.47987e-06	-7.08679e-06	-5.65396e-07	-6.90925e-06	-5.03207e-05	-1.17753e-05	6.46333e-05	-0.0332985	-5.2206e-05	7.189e-08	-0.00380686	1.36291e-06	-9.28824e-07
LC.03.0680	0.0564602	0.0366615	-0.0476841	-0.00190047	-2.05552e-06	-0.0246102	-0.032392	3.43881e-05	-0.035553	-0.000444178	-0.00022359	0.0349171	-0.0853867	-0.00170414	9.41017e-06	0.0475402	-0.00737742	-0.00848935	1.91552e-05	0.0288848	-4.34214e-05	7.39115e-06	0.000390488	0.000244161	-0.000148822	0.00292711	2.1227e-05	-8.06569e-05	-0.000873568	-0.000374681	0.000726542	-0.000135145	6.28197e-05	-0.0774827	0.0279166	0.000103869	5.24229e-05	1.16187e-05	-9.6716e-09	1.89406e-07	0.000138987	2.06353e-05	1.47255e-05	-0.0387743	-0.000105304	0.000631973	0.113524	2.41596e-05	4.68334e-06
LC.03.0602	0.0564595	0.00602501	-0.0152154	0.0124154	3.30463e-06	-2.71809e-05	-0.00324016	-2.71022e-05	-0.0604225	5.73542e-05	-0.00170866	-0.000198492	-0.000496222	8.13842e-06	-7.0654e-06	-0.000111681	0.0547154	-0.0227618	1.21102e-05	0.00031794	-2.32987e-05	8.42644e-06	-0.000889394	0.000355159	-0.000141919	-0.00152596	0.000386746	0.000500876	0.000595069	5.32291e-06	0.0210362	3.33477e-05	0.120797	-0.000212083	0.0233237	0.000154878	-0.000764098	-1.90587e-05	6.1998e-07	2.18874e-05	-3.85515e-05	-7.71497e-07	0.00076141	-0.0230163	-9.9625e-06	8.42673e-06	0.00193522	-1.5785e-05	-2.60647e-06
LC.03.0394	0.0563525	0.0211374	-8.24581e-05	-0.00251533	2.58256e-06	-0.0323518	0.0062147	-0.00494358	0.00116819	0.000697073	0.000820157	-0.0186444	-0.000992307	0.0243683	-0.000149875	0.000176682	-0.0289625	0.0117758	-1.99542e-05	-7.05587e-06	-8.04106e-05	-8.47658e-05	0.0286149	-0.000164798	-0.0551986	0.0672703	-0.00133389	7.26908e-05	0.000124858	-0.000156917	0.000535244	0.000100398	0.0496407	-0.00141217	-0.00151355	0.000313056	-0.000666518	3.48469e-05	-7.91447e-05	0.000198474	0.000157584	-6.50265e-06	-0.000614271	0.000111432	-0.000170892	9.98526e-06	0.0123023	9.21659e-05	-9.05133e-06
LC.03.0088	0.0562507	0.01332	-0.000904012	0.00891617	-0.0177057	0.000322541	-0.0314411	-0.000188626	-0.116764	0.00013282	0.00035199	-0.0182903	-0.00571559	-0.0039122	-5.62672e-05	0.0571028	0.00062372	0.0402639	0.000521076	0.0178495	0.0158091	5.10845e-05	1.81946e-05	4.78311e-05	0.0286871	-0.000580305	-0.000387995	-4.71701e-05	0.0541749	3.78227e-05	-0.000568871	-0.000248124	-0.17417	-0.00016694	-0.0219642	0.000120652	0.000138514	7.26653e-05	-0.000159454	-3.56832e-06	2.44148e-05	-5.53357e-06	0.0432316	-0.00132063	-4.02644e-05	2.42621e-05	2.85246e-05	0.00018259	-4.96999e-05
LC.03.0723	0.0562168	-0.0189544	-0.0779868	-0.0321454	-0.0353111	-2.22262e-05	-0.00121006	9.91992e-05	-0.0227654	9.76933e-05	0.000274459	0.051364	0.0164354	0.00020092	-1.84204e-05	0.0282864	0.0355592	0.00144185	-2.3565e-06	-0.00120743	-7.11548e-06	1.85923e-05	0.000581707	1.12312e-05	-0.000658467	-0.0222185	-5.85999e-05	-1.55503e-05	-0.147214	0.000291992	-3.81053e-05	-1.34356e-05	8.41352e-05	1.37891e-05	0.0368549	-0.001026	-0.000173075	1.02331e-05	-2.16018e-06	-4.01654e-05	5.97041e-06	-1.72749e-05	-1.81001e-05	-0.0351985	7.11423e-05	3.84801e-06	-0.0102663	-3.50693e-06	1.24993e-05
LC.03.0726	0.0562056	9.17002e-05	-0.00075941	-0.00022278	1.97715e-05	-0.00108889	0.0465205	8.52225e-06	-0.121873	-0.000412976	5.84342e-05	-0.000122914	-0.00114978	0.00440276	1.17212e-05	0.0499198	0.010454	0.00457236	7.46235e-06	-0.00842688	-0.000185594	-0.000174411	0.000343471	0.00016873	-0.000159596	-0.00198951	-0.0333074	0.000231806	0.0662211	-9.12722e-05	0.0140691	0.000555532	-0.10025	0.000502464	-0.00515805	0.000161953	-0.000374209	-1.4624e-05	0.000345316	-7.90953e-06	-0.000698583	-9.16061e-06	-0.0226084	-0.0173152	-0.000220292	5.9896e-05	0.00638626	1.62651e-05	1.75238e-05
LC.03.0016	0.0561093	-0.00507498	0.0426333	0.0444763	-1.45938e-06	0.100659	0.00652549	-5.55293e-05	0.0275275	2.46359e-05	-0.000593059	0.017634	0.00844935	0.0105285	2.25158e-06	-0.000166209	-0.0241394	0.0140117	-2.41775e-05	0.0438999	1.31377e-05	-3.24239e-05	0.000186787	1.35308e-05	0.000129893	0.0913376	-0.000230587	0.000109241	-0.000898835	2.91375e-05	-0.000127988	-0.000203593	0.000106462	5.91764e-05	0.0174759	0.000679048	-0.000177687	5.43449e-06	1.98813e-05	-3.18376e-05	-1.00326e-05	-3.30114e-06	5.1339e-07	0.000704564	-5.39105e-06	-7.65417e-06	-0.000931944	6.07402e-06	-1.74278e-05
LC.03.0486	0.0560602	0.000881451	-0.0307637	-0.0130247	-0.000153483	-0.0173481	0.000587049	8.82787e-06	0.000986774	0.00347767	-8.13688e-05	-0.00109348	0.128763	0.0014085	0.000202703	0.000531846	-0.0136025	0.0169323	-0.000548727	-0.0743621	-3.83403e-05	-8.82798e-05	-0.000236302	-7.43396e-05	-0.000291011	-0.00399528	0.00242984	0.000122305	0.047847	-7.57778e-05	-0.000823337	0.0055904	0.018315	0.000641582	0.00616726	0.00427747	5.43211e-06	-1.57848e-06	6.3682e-06	-1.74174e-05	3.23194e-05	5.52231e-05	-0.000160258	-0.0140379	0.000297749	3.49316e-05	-0.0138843	7.43558e-05	-5.63176e-05
LC.03.0408	0.0559745	0.0153579	-0.00918465	0.054527	-5.89265e-05	-1.38048e-05	-0.000198839	-1.95501e-05	-0.0303417	2.19208e-05	0.00170083	0.0374855	0.0163317	-0.0162658	1.97139e-05	-0.0298837	-0.0714159	-0.0431039	3.67118e-06	-0.000295103	-6.75246e-06	-0.0116772	0.000138143	2.0782e-05	3.27158e-07	-0.000445123	-0.0192306	1.40289e-06	0.00285404	1.82219e-05	-0.00156011	0.00781989	-6.70223e-05	-0.184467	-0.0179073	-1.84318e-05	6.85292e-05	4.36734e-06	-1.16494e-05	-3.47365e-06	1.35548e-05	-1.48247e-06	-4.45955e-05	-0.000789195	-3.90956e-05	-3.57694e-05	-0.028196	-2.6937e-06	-4.18255e-05
LC.03.1067	0.0559541	-0.0314475	0.0261253	0.0647245	-1.15539e-05	0.000718471	0.0459057	0.000397124	0.00346288	0.000778108	7.7813e-05	0.0634949	-0.000339369	-0.00966173	-0.000636937	-0.021296	0.00182993	0.0213006	-1.08483e-06	-0.00521208	4.49547e-05	-3.28519e-05	-5.38447e-05	-3.29608e-06	0.0241112	0.00124645	0.000100414	0.00017694	-0.0450734	0.0142707	-0.000354592	-0.00012466	0.00739498	-0.000223012	0.00138775	-0.000191294	-0.000103478	-6.16062e-05	-1.09878e-05	0.00129391	0.000171227	-7.61135e-05	7.2528e-05	-0.00213301	-8.7126e-05	3.07936e-05	-0.000689001	-4.49873e-06	0.00124589
LC.03.1095	0.0558457	-0.015009	0.000853435	0.0391349	-0.0001538	-0.000188075	-0.00374193	-0.000283871	-0.00133609	-0.000320218	-0.01345	-0.0231297	-0.0428133	0.00451716	-5.75127e-05	0.00333944	0.00933395	-0.000730327	0.00139397	0.00205397	0.00106783	0.000244533	0.00321228	8.55019e-06	-0.00187921	-0.0153338	0.00157999	4.65794e-07	-0.00140095	0.000146745	0.00132011	0.0120028	0.000236187	-0.000207745	0.0337952	0.0177176	0.00110614	8.67652e-06	9.34699e-06	-4.20269e-05	-3.05691e-05	-4.44395e-05	9.2166e-05	-0.153969	-3.18692e-05	-7.48902e-05	0.000351569	0.00018209	-0.000147162
LC.03.0670	0.0558203	-0.00228869	-0.0240733	-0.0339863	1.22694e-06	0.0672369	0.000219968	-2.51427e-05	0.0451447	0.0054788	-7.48425e-06	0.00207885	9.42759e-05	0.00268433	-1.11857e-05	-0.040904	-0.127244	0.00106899	6.84445e-06	-0.00119616	-1.99564e-06	1.59308e-05	-0.000645662	-2.41885e-05	-0.000167167	0.0561904	0.000549314	8.1832e-05	-0.026778	9.85054e-05	-0.000112839	0.00077293	-0.0557307	-2.17342e-05	0.0153584	0.000153322	-7.33215e-05	1.28058e-05	3.15131e-07	4.2936e-06	-0.000921189	-1.44591e-05	-0.00073357	0.014297	0.000113374	3.87511e-05	0.0659375	-7.25545e-05	1.9083e-05
LC.03.0291	0.0556967	0.0160448	-0.000207301	0.0420104	2.78302e-07	2.15504e-05	0.000867129	2.23355e-05	-0.0193762	-8.72852e-05	7.38026e-05	0.0224199	-0.0286281	-0.0193092	-3.37643e-05	-0.0472243	-0.0338685	-0.0604779	7.44684e-07	0.00129441	2.48224e-06	-6.03747e-06	0.00014654	4.17507e-06	-0.00340113	-0.0575094	-0.0221432	0.000103619	0.00527595	-2.84603e-05	4.81987e-05	0.000422012	-3.9457e-05	-0.182374	-0.0238242	-0.0179234	1.85427e-05	3.71064e-06	2.20604e-08	6.8151e-07	-3.09169e-05	-4.56421e-06	-9.3435e-05	-0.000432416	-7.11992e-05	2.94239e-06	0.0715072	2.42568e-06	3.30555e-07
LC.03.1036	0.0556701	0.010339	0.0229969	0.00868207	-2.06056e-06	0.0625424	-0.0409628	-0.00107275	0.0164957	9.3061e-05	3.01702e-05	-0.0138723	-0.0217018	-0.000222594	-0.000238722	-0.00143773	0.00862196	0.00104531	1.25062e-05	0.0298367	2.19895e-05	-1.06379e-05	-0.00737213	-4.54382e-05	-0.000121233	0.0972126	-0.00171072	5.31785e-05	6.90946e-05	-0.000162539	-0.000157374	-0.000213303	0.147002	1.07015e-05	0.00102808	0.000559722	-0.000208494	8.57738e-06	3.64047e-06	2.45004e-06	-0.000629935	2.04947e-05	4.24517e-05	0.0215251	0.000201302	-2.34065e-06	-0.0662487	0.000368436	0.000238757
LC.03.0502	0.0556643	0.000694697	0.0031736	-0.000860814	3.58269e-06	-2.09198e-05	7.01874e-05	-3.02273e-05	-1.00171e-05	6.21708e-05	-9.30949e-05	-0.00649835	0.00072263	-0.0462207	-0.000710585	-0.151975	-0.0021749	0.00182555	1.33427e-05	0.000110201	-3.61908e-05	0.000913404	0.000123135	-2.63741e-06	0.000472957	-0.0297477	-0.0005593	-0.000193104	9.19956e-05	-5.62921e-05	0.0413265	-0.000124836	-0.012509	-1.8175e-05	-1.13058e-05	0.00379716	-0.000112665	-4.82255e-06	1.4668e-05	-1.77225e-06	-8.94076e-06	-0.00010935	0.000205773	-0.00357268	-6.39993e-05	-2.44208e-05	-0.0174333	1.37254e-05	2.32616e-05
LC.03.0246	0.0555033	0.0101439	0.02403	0.071265	-2.31912e-05	4.51672e-05	-0.000484413	1.80849e-05	-0.0359296	-0.000250156	0.000329121	0.0725851	0.0123807	-0.0253537	-6.66555e-07	-0.0170553	-7.5211e-05	-0.0419677	-1.34332e-06	0.00259133	-2.88284e-05	-4.06694e-06	-0.00065941	7.09859e-05	7.56081e-05	-0.0114867	-0.0128378	0.0176468	0.0189675	-8.55602e-05	-0.000248369	0.000133196	0.00141362	-0.1579	-0.0280629	-7.63054e-05	-1.51e-05	-3.71168e-06	2.31211e-06	-5.33703e-05	-4.74171e-05	6.78897e-05	-1.00286e-05	-0.000965041	3.46321e-05	0.000109066	0.000165471	-4.25833e-06	1.12727e-05
LC.03.0006	0.055492	-0.000403856	-3.10512e-05	-0.000132623	3.15101e-06	0.109998	0.029395	-5.60283e-07	0.0229011	-5.02054e-06	-8.11914e-05	-0.000302256	-0.000146127	-0.000899859	-1.66165e-05	-4.99375e-05	-0.082675	0.00514991	-1.57022e-05	0.0350762	-7.13229e-06	-3.05912e-05	-0.000302612	-0.000136681	-1.05451e-05	0.0727867	-1.28874e-05	9.17234e-05	-0.0280475	6.67558e-05	5.44013e-05	0.000404833	-5.32913e-05	3.53461e-05	0.00825296	0.000361854	-7.55294e-05	-1.03911e-05	5.28742e-07	7.31718e-06	0.000480655	7.44747e-07	-7.94752e-05	0.04314	4.28903e-05	-3.00236e-06	0.075875	-1.05234e-05	1.8587e-05
LC.03.0247	0.0553133	0.018474	0.030592	-0.00290422	-5.94024e-06	-2.18244e-05	0.00107179	-9.17127e-05	0.000219293	-0.000220791	0.000732918	-0.00486871	-0.0263829	-0.109385	-6.21248e-05	-0.121543	1.86454e-05	-0.00442051	-1.05782e-05	0.000837321	-0.00056519	3.94548e-05	-0.000277643	9.23776e-05	-0.00317582	-0.00133777	-5.78712e-05	5.64246e-05	-0.00281802	-2.80486e-05	0.000225781	0.00358408	-0.000103465	2.49496e-05	-0.0322714	0.0152898	-0.000168852	7.3102e-05	-1.37854e-06	-2.68742e-05	3.6121e-06	4.71732e-06	0.000230057	-0.0338028	-0.000147936	1.71281e-05	9.48285e-05	0.000327403	-5.29879e-05
LC.03.0820	0.0552881	-0.00389006	-0.0290043	-0.00294786	7.68584e-06	0.0522469	0.00122004	-7.14116e-05	0.0601789	0.000147024	1.86755e-05	0.00101257	-0.00335536	0.0230245	7.19647e-06	-2.68232e-05	-0.0208776	-0.000111192	6.66212e-05	-0.00118437	-7.84767e-05	2.10836e-05	-0.000387626	0.000137729	0.000373988	-0.000399971	0.00226834	-1.93861e-05	-0.113259	0.000574817	-0.00828398	-7.11615e-05	-0.00133307	2.25589e-05	-0.00394494	-0.000382329	-4.42919e-05	-6.85018e-05	-6.38993e-06	2.6696e-05	-6.48647e-05	-9.63465e-06	-0.000328409	0.00101222	9.17998e-05	-4.05745e-05	0.191498	-5.12257e-05	4.11759e-05
LC.03.0661	0.0552423	-0.00250886	-0.0366193	-0.0144106	-7.17542e-07	0.000452359	0.0334049	-0.000647834	-0.000909129	-1.42869e-05	-0.00555876	-0.00425722	-0.0257286	0.06896	0.000388415	-0.0751353	0.000933885	-0.00156708	-1.46474e-05	-0.00121108	1.90049e-06	-0.000214648	0.0175407	4.00718e-05	-0.000870723	0.00150768	0.000541019	-8.0071e-06	0.000611263	-2.66716e-05	-0.0440771	0.00045075	0.000458408	0.000789726	-0.027529	0.00035533	-8.15979e-06	-3.60977e-06	9.86967e-05	-7.0655e-05	-9.71391e-06	4.73667e-05	3.38505e-06	0.0181209	5.56511e-05	-0.000151876	0.00301269	7.17713e-06	-0.00105937
LC.03.0748	0.0552051	0.0164498	-0.0429148	-0.0296171	-2.32565e-05	-0.0315527	-0.0592894	-0.000146423	-0.0264935	-5.04983e-06	-0.00151706	-0.00802246	-0.00240468	0.00740502	-0.0024755	0.0527899	0.00621069	0.00565251	5.16033e-05	0.0464582	-3.17584e-05	4.64869e-05	-0.000764577	0.000113753	-0.000660546	0.0936623	-0.00903085	-0.000225716	-0.00402602	-0.000332477	0.00178787	-0.00010381	-0.000112661	0.000766078	0.00416839	-0.0335579	-0.000495494	1.46213e-05	7.0977e-07	3.41122e-05	8.57581e-05	-2.78443e-05	-0.000214328	0.0690771	-9.29159e-06	7.30028e-06	-0.0405803	0.000173047	-0.000229887
LC.03.0239	0.0550601	-0.0295116	0.00130106	0.0490169	2.69339e-06	0.000125308	0.0228409	-0.000261016	0.0266147	0.000581352	-6.66609e-05	0.000195741	0.0357839	0.00106201	-3.68654e-06	0.0158924	0.0589212	0.0109318	4.64884e-05	-0.00255722	1.61933e-05	-0.000118927	0.00143838	-7.18142e-06	-0.000563696	-0.000212275	5.56793e-08	-2.81055e-06	-0.114531	-0.000179449	0.000195538	-1.39136e-05	0.000311689	2.2222e-05	0.00476255	-0.00172806	-3.26795e-06	-1.74975e-05	-3.70542e-06	8.11616e-06	-1.38907e-05	-3.17315e-06	-0.000518552	-0.0232195	3.40744e-05	6.43098e-07	0.0265859	4.68118e-05	1.94879e-05
LC.03.0580	0.054983	0.00729693	-0.000635985	-0.0419222	3.98826e-06	-0.00211845	0.0149228	9.43428e-06	-0.0213991	-4.65827e-05	0.000351102	-0.0301504	0.051134	-0.000847966	9.43325e-05	0.000649645	-0.0101069	0.0562884	-8.95276e-06	-0.00296464	-0.0208051	8.68739e-06	0.017818	-1.07924e-05	0.000266749	-0.000934188	-0.000609076	0.000203806	-0.0628621	0.000153056	7.44817e-05	-0.000242446	-0.000195452	1.99418e-05	-0.0112024	-0.000730914	2.64299e-05	3.29859e-05	-5.29424e-07	5.5342e-06	4.97051e-05	-3.83695e-06	9.37648e-05	0.0158549	-0.000116468	-1.3057e-05	0.00467665	-1.49753e-05	6.31671e-07
LC.03.0285	0.0548475	0.00949823	-0.032483	-0.00649435	2.4001e-05	0.000310151	0.0347665	-0.000144932	-0.0539269	-3.66301e-05	-0.000250631	0.0206092	-0.000451017	0.0193076	-0.000311508	-0.0468906	-0.0866649	0.0451839	0.00013611	-0.00934193	4.1935e-05	-4.52893e-05	0.00749625	0.000118357	0.0317439	0.000837186	0.00261278	2.83048e-05	-0.000250014	0.00111247	-0.0358537	0.000188653	-0.0523273	-0.00236688	-9.46361e-05	0.00125113	0.000448559	-1.04861e-07	4.21314e-05	3.69006e-05	-1.31449e-05	2.71011e-07	-0.00180783	-0.045251	-2.19675e-05	7.27461e-05	0.00282434	9.91486e-06	-0.000188083
LC.03.0739	0.0546408	-0.0220909	-0.0585108	0.000218158	-2.79259e-05	1.80004e-05	-0.000597491	5.87943e-06	-0.0162782	-5.74745e-05	9.19292e-05	-0.00859907	-0.000341512	0.000418536	0.000106899	0.0424946	-0.0308444	-0.000693546	7.04137e-05	5.69053e-05	3.27871e-06	2.33807e-05	-0.000696823	-0.00040716	0.000284143	0.000698656	-0.00022317	-0.000353608	-0.230406	0.00193143	-0.000201745	-6.37761e-05	-0.00012592	0.000386897	0.00389655	0.000575308	0.000150237	-1.8283e-05	1.16838e-05	-5.48166e-06	0.00403828	4.60713e-06	0.000109066	-0.146479	2.14925e-05	-6.22475e-05	-0.0477632	2.18774e-05	-0.000175955
LC.03.0849	0.0546091	-0.00554595	6.66911e-06	0.000411575	2.67924e-06	0.00198936	0.0101477	-0.00115294	-0.00643927	0.000521601	-0.00281505	-0.0636235	0.00224335	-0.0408194	4.89025e-05	-8.72967e-05	-0.0156566	0.0137691	0.000102096	7.05634e-06	-2.38925e-05	3.07737e-05	0.0346862	-0.000704435	0.000747381	0.00065596	0.000204767	-0.00895284	-0.109373	-2.49643e-05	-0.0474431	-0.00121215	-0.000914115	0.000202342	0.00918038	-7.36867e-05	6.79052e-05	-3.34905e-05	4.68559e-06	-1.14594e-06	9.12894e-05	2.31291e-05	-0.000199078	-0.00168731	-4.92661e-05	-4.09999e-06	0.00344827	0.000126615	0.00145355
LC.03.0076	0.0545355	0.0107755	-0.00123721	-0.00372318	1.91043e-06	0.000102922	0.00134303	-6.33704e-06	0.000102057	0.000310968	0.00111295	-0.0199229	0.0115682	0.000684455	0.00379136	-0.157674	-0.003675	0.00599735	0.000505718	-0.0241	-6.7942e-06	5.07002e-06	-0.00282542	0.000138991	0.00103356	0.00354125	-5.84088e-05	-0.000271735	0.000600676	1.09611e-05	0.0619547	0.000284214	-2.36466e-05	9.75526e-06	0.00757754	6.65778e-05	8.22721e-06	3.66273e-06	-1.11706e-05	8.35553e-06	1.37258e-05	-3.40184e-06	5.89708e-05	0.0289596	-5.09218e-05	-1.30649e-05	-0.000106546	0.00019798	8.98362e-05
LC.03.0110	0.0545165	0.0109189	-0.0290908	-0.0421651	1.05718e-05	9.76753e-05	0.0427339	-1.71877e-05	-0.0643141	1.35688e-05	0.000143798	0.0173303	0.00472246	0.0186973	-3.1793e-05	-0.000271108	0.00305357	0.0217681	-1.28081e-05	-0.0164294	-9.96041e-06	6.81934e-05	0.00155478	-9.81965e-05	0.0002972	-0.0030384	0.000358449	2.26899e-05	-0.00105332	0.000246903	-0.0126061	-0.0457972	-2.1629e-05	-0.0421339	0.0273262	0.000822819	-2.48976e-05	2.37865e-05	2.86696e-07	-1.82137e-06	0.00104496	2.52465e-05	0.0489425	7.63235e-05	0.000573441	1.76867e-08	0.000217653	1.63994e-05	5.0577e-05
LC.03.0812	0.0545104	-0.00495354	-0.0596051	-0.000540362	-7.82877e-06	-0.000133345	-0.00103446	6.82675e-05	-0.00229829	-0.00135121	-0.0476295	-0.0147746	-0.00151329	0.0532662	0.00011709	-0.0763859	0.00217153	-0.00237521	-0.000462827	-0.00878797	8.41899e-05	-0.000147658	0.00945855	5.19509e-05	-9.96579e-05	-0.0052878	0.00200145	-7.10156e-06	0.0358423	-5.22663e-05	-6.80903e-05	-0.00297729	0.000538462	0.000250325	0.00137277	0.000302743	4.99489e-05	-1.12129e-06	-6.77229e-07	2.60322e-06	-0.000152816	8.03643e-05	-6.95724e-05	0.0306786	0.000177774	-1.86677e-06	-0.000775542	-0.000119	-0.00103345
LC.03.0598	0.0544837	0.00729805	0.0362111	0.0128611	4.81792e-05	0.000106223	-0.00104771	0.000135193	0.00291942	0.000295711	0.0258989	0.0017658	-0.0208209	-0.0482787	-5.09941e-05	-0.12751	0.0411083	0.0251703	2.73783e-06	0.000320514	-0.000128951	0.000473644	-8.78911e-05	0.000168128	-8.25858e-05	-4.60791e-05	0.000931012	8.253e-05	-0.000316931	-0.000381124	0.0561588	3.90141e-05	-0.000187861	-3.37464e-06	-0.0283939	-0.000149357	-3.08664e-05	-1.14931e-05	9.39368e-06	1.12095e-05	-0.00047352	-0.000162512	0.000389678	-0.0710386	-9.63492e-05	1.84957e-05	-0.00135211	-1.52112e-05	6.31633e-05
LC.03.0483	0.0543951	-0.0375484	0.000637343	0.044357	-0.000145474	0.000550509	0.0678981	-6.72725e-05	0.00552653	0.00150759	0.000153789	0.0105279	-0.00183056	-0.0108644	-3.12953e-05	-0.000750068	-0.0152745	0.0117684	4.26532e-05	-0.00226605	1.33126e-05	-6.64914e-06	-0.00122653	-0.000145367	0.00102652	0.00162903	-0.000377103	-0.000265291	-0.063222	0.0376913	-0.000555145	-0.000278822	0.000682436	4.57526e-05	-0.0112733	-6.0582e-05	0.000529011	-3.9475e-05	1.66966e-06	5.85409e-05	0.000481281	9.07384e-06	-0.00150077	0.0393799	-1.53396e-05	0.000225359	0.000668947	3.14489e-05	0.000465516
LC.03.0007	0.0543718	0.00432366	0.00741031	0.000942649	3.46283e-07	0.0890834	0.0235988	1.89992e-05	0.0411478	2.47482e-06	4.67472e-05	-0.017057	-0.0698686	0.000372933	1.27997e-05	-1.10756e-05	-0.0260965	-0.000126628	5.66574e-06	0.0169462	8.48884e-08	-4.8778e-06	-0.000168911	-2.24705e-05	1.89237e-05	0.0457512	4.53865e-05	-3.37118e-07	-0.0134043	6.2833e-05	-0.000141997	0.000201724	1.26068e-05	7.58133e-06	-0.00141626	-1.06276e-05	2.23058e-06	-4.84935e-07	6.7884e-08	-1.18644e-06	0.00120477	-3.10302e-06	3.84799e-05	0.00024863	7.99756e-06	-9.1734e-06	0.212196	-2.68003e-06	9.80215e-06
LC.03.1026	0.054175	0.00308696	0.000373898	-0.0376804	4.36905e-05	-0.035919	-0.00090395	0.000160378	-0.000327487	-0.0020678	-0.00173469	-0.0126503	0.000211238	0.0028605	-0.000153169	-0.000310906	-0.00133386	0.0433306	-5.16397e-05	-0.00326704	-4.1881e-06	1.51977e-05	0.00360195	-0.000157567	0.00119235	-0.00380963	0.0014339	0.00376581	-0.000146676	-0.000262665	-0.000356038	-0.00344254	0.0469256	-0.000751534	-0.0487697	0.000157203	-8.28786e-05	0.000383963	-2.75809e-05	-5.2246e-05	7.21437e-05	-1.69031e-05	0.000101366	0.00504358	-9.73406e-05	-9.938e-05	0.0393932	-5.17589e-05	-0.00163096
LC.03.0349	0.0541406	0.0162066	-0.00116426	0.000378107	-1.05708e-05	-0.00209573	0.0264262	-8.25079e-05	-0.116246	-0.000125483	-0.000100556	-0.000974415	-0.00201989	0.00342109	-0.000258233	0.083559	0.000811166	-0.00808647	-2.83699e-06	-0.00416795	-4.73993e-05	-0.000103451	0.00109022	0.001067	-0.00013678	-0.0309931	-0.0377441	-2.57553e-05	0.077039	-0.00036808	0.0377916	6.2237e-05	-0.089427	0.000114336	-0.0221222	0.00167908	-8.94674e-06	-5.93831e-05	0.000476804	7.38859e-06	-0.000496831	-2.50386e-05	-0.00353081	-0.0199482	-3.23019e-05	0.000184048	0.000264404	6.16887e-05	0.00025511
LC.03.1011	0.0541055	0.0108293	-6.56314e-05	-0.0778727	-7.01799e-06	-0.0192652	-0.0225684	-0.0171659	0.0972128	0.000125138	-8.55166e-06	0.0147609	0.059251	0.00013628	1.26233e-05	-0.000521016	-0.000469525	0.00130325	-5.38307e-05	0.0277265	1.32831e-05	-0.000166111	0.00100534	3.05794e-05	-7.3618e-05	-0.000975689	-0.00103536	0.000480406	0.00261254	-0.00030978	-4.45186e-05	0.0460283	0.000127887	0.00012504	0.029041	-0.000206015	-9.18625e-05	-1.16109e-05	1.03552e-05	-5.8714e-06	-3.98777e-05	-7.54787e-07	1.026e-05	0.00770787	0.00159991	0.000220697	0.00998348	0.000196533	1.44628e-05
LC.03.1091	0.0539649	-0.02544	0.0772752	0.000450075	8.1516e-06	0.0430314	-0.0242144	9.16022e-06	-0.0749223	0.000216044	-0.00353956	0.0224712	0.0449257	-0.000562757	-1.73391e-05	0.0247076	-0.0482077	-0.0477379	-1.6e-06	-0.0034205	1.37786e-05	5.27519e-05	0.00134529	5.13198e-05	-0.000380301	-0.00295065	0.000327282	-0.000510604	0.0400449	9.61252e-05	0.000411948	-5.385e-05	-3.85438e-05	3.19766e-05	0.00107771	-0.0261879	0.0154426	5.04423e-06	3.64142e-06	5.45333e-08	-5.36957e-07	-1.46621e-05	0.000517824	-0.00760057	-4.32833e-05	-2.86334e-07	-0.0632442	-2.72523e-05	2.93357e-05
LC.03.0736	0.0539332	0.000537564	-0.000242025	-0.0173032	9.42409e-06	5.04835e-06	0.000371001	-2.77677e-06	-0.0642597	-5.15256e-05	-1.46395e-05	-0.00988851	6.32859e-05	0.0250818	2.09531e-05	-0.000560636	-0.000237051	-0.000296129	1.36633e-05	0.00216206	5.29819e-06	1.69783e-05	0.00102952	1.80624e-05	0.000170716	-0.000480943	-0.00027506	-5.33646e-06	8.83924e-05	1.57156e-05	0.000709476	-2.00162e-05	3.54019e-05	-4.40253e-06	0.0210827	-8.4755e-05	1.17613e-06	-5.56766e-05	-1.83982e-06	1.46635e-05	9.8188e-05	-1.49208e-05	0.000113425	0.000222688	-4.80426e-05	-4.19669e-05	0.000306233	5.75747e-06	-2.93308e-06
LC.03.0109	0.0538883	0.0130321	0.0418669	0.0442044	-5.36304e-07	0.0597239	-0.008348	-2.7982e-06	0.000247967	-3.10391e-05	2.25815e-05	0.0244255	-0.0146988	0.000235738	-5.5345e-06	-1.88027e-05	0.0818978	0.0155385	-3.9517e-07	0.000296348	8.74392e-06	4.2575e-06	0.000142624	3.53687e-05	-0.000453129	0.0819968	-0.00110105	-9.51292e-06	0.0167509	-0.000178903	0.000208135	-7.83393e-06	0.158153	-6.21668e-05	-0.000908778	0.000262589	-3.33067e-05	2.28031e-06	4.21354e-08	-2.4495e-06	-1.14375e-05	-6.56064e-06	6.30114e-05	-0.000455586	9.24976e-06	0.000416239	0.000451841	0.000139449	3.11655e-05
LC.03.0249	0.0538065	-0.00129207	-0.0351864	-0.0135323	-0.0245823	0.000330491	0.00309699	0.0236116	-0.0764016	0.000293041	-0.000219602	0.021357	0.033038	-0.00181614	-2.38333e-05	0.000943366	0.000713872	-0.00832573	1.84851e-06	0.00964026	-2.13154e-05	8.73045e-05	0.00580531	-0.000339492	0.0240333	-0.000530745	-0.000200129	-0.000132902	-0.000447142	0.000104682	-0.000269529	-0.000286762	-0.0697791	-0.000357589	0.0670864	-6.7817e-05	0.000267201	-5.12057e-06	-2.67353e-06	-2.3595e-05	5.51392e-05	-3.94671e-05	0.000657193	-0.0613673	-9.98972e-05	6.93143e-05	0.00313454	-2.26543e-05	-1.22825e-05
LC.03.0218	0.0535655	0.0128535	0.0335965	-0.0271964	2.65193e-05	-0.000197082	0.0445666	-0.00175579	0.0544958	-4.76229e-05	-0.00740925	0.0233409	-0.00055587	0.00710197	-6.4483e-06	-0.000164629	0.000194175	0.0628186	-0.000290403	0.00122624	4.30327e-05	-0.000145485	0.000203613	-0.00172503	9.07742e-05	0.0391349	0.000566201	7.92449e-06	0.0232898	-0.046971	-0.000343945	-1.29855e-05	0.0849221	-0.0001759	0.00599737	0.000265021	-0.000240614	8.1266e-06	9.87801e-05	-5.05874e-05	-0.000859071	-2.17527e-05	-0.00370782	-0.00291466	8.77533e-05	-0.000579064	0.000275175	0.000328635	-8.39566e-05
LC.03.0054	0.0533665	0.0248579	-0.00048795	-0.00728004	1.19742e-05	-5.77406e-05	0.000530962	8.3997e-06	0.000189309	-0.000605265	0.0202054	-0.0209487	0.00179285	0.0496945	3.05202e-05	-0.119602	-0.00372791	0.0281799	7.15744e-06	-0.0457681	2.33738e-06	6.95177e-06	0.000286035	-5.09569e-05	0.00129438	-0.00204909	-0.000136028	3.1355e-05	0.000173287	-3.50003e-06	0.108216	-0.000130078	-0.00282103	-4.45572e-05	0.0340511	0.000138783	-0.000141112	7.62993e-06	-2.63085e-06	-0.000131352	-0.00123381	-1.02079e-05	0.00031476	0.00155468	-6.24529e-05	-0.000108368	0.00333662	-7.67458e-06	-0.000127359
LC.03.0714	0.053358	0.0228166	-0.000164436	0.0662721	2.79785e-05	0.00218403	0.0132818	-0.000146706	0.000389892	0.000449111	0.000482195	0.0452313	-0.0250824	-0.00667064	1.30203e-05	-0.00183941	0.0289942	0.0233658	2.429e-05	-0.0353438	1.41777e-05	-1.98441e-05	-0.00450606	0.000156674	-0.000159467	-0.00341925	0.000232673	-4.08528e-05	-0.0313236	9.03086e-05	-0.000519573	0.00168717	4.90913e-06	-0.112906	-0.0190447	0.0263812	-8.29691e-05	-6.69682e-06	6.11283e-06	4.28329e-06	-1.44211e-05	-5.4334e-06	1.61102e-05	-0.00781358	5.69659e-05	2.43238e-05	0.0759113	6.79016e-05	-0.000106415
LC.03.0245	0.0528923	-0.0128163	-0.0596148	-0.0397848	-0.0693543	-0.000148253	0.000236459	9.89661e-06	-0.000695698	-3.77885e-05	0.000863286	0.046712	0.022182	-0.00850409	-1.68644e-06	0.00066553	0.0232443	-0.00147139	-3.09025e-06	-0.000277333	1.7489e-05	-3.39254e-05	-0.00144291	0.000102225	-0.000653563	-0.00471437	0.000388706	1.30894e-05	-0.128648	0.00010305	-0.000225427	-0.000155742	0.018301	-1.16585e-05	0.0351107	-0.0195754	8.67305e-07	5.00474e-09	2.75798e-07	1.38597e-05	1.52942e-05	3.72742e-05	-5.62788e-05	-0.052479	5.85404e-05	-6.30367e-05	-0.00113555	2.76945e-06	7.0818e-07
LC.03.0738	0.0527724	0.00955263	0.0539269	0.0198067	1.05549e-05	-0.000152464	0.0015509	4.98528e-05	-0.00143821	-5.36738e-05	-0.000184711	-0.00435675	-0.00139702	0.000186042	-0.00192814	-0.139091	0.000574183	5.23629e-05	-6.1066e-05	-0.000591292	-2.48918e-06	-4.76351e-05	0.000116351	1.78386e-05	-0.00180652	-0.000241126	0.000281421	4.8161e-05	-0.00552264	-4.90993e-06	0.0666626	2.55052e-05	-0.000215481	0.00011474	0.00121018	-0.0193069	2.4356e-05	-5.67469e-07	-2.49712e-06	4.08979e-05	-4.80432e-05	-3.8636e-05	2.92598e-05	-0.0856124	-0.000623812	0.000539314	2.83402e-05	5.91379e-06	-6.95435e-06
LC.03.0387	0.0526341	-0.0107904	0.00188701	1.01963e-05	-5.10386e-05	-0.00026209	0.00499553	-0.00021347	0.0492111	0.000638553	-0.0198354	-0.021517	0.0214717	0.0462107	-0.000614372	0.000882118	0.00103084	0.00557237	-0.000208491	0.00326442	-5.00563e-05	-2.28869e-05	-0.0074538	0.000299654	-0.000146996	0.063655	-0.000305887	0.000575706	-0.0053108	0.00213761	0.000922126	0.000114657	-0.000366867	0.000376957	0.0104439	-0.00027679	-0.00344666	-4.32056e-06	-2.33431e-05	-5.8062e-05	0.00011252	-9.32342e-05	-3.10219e-05	0.00268042	1.2349e-05	-1.59803e-05	-0.00336325	1.2251e-05	3.35112e-05
LC.03.1064	0.0524088	-0.0031136	0.0307901	0.00363741	1.39713e-05	-0.0721122	0.0388594	6.07141e-05	-0.0286136	0.000384989	0.00125663	0.0697715	0.011127	0.00329582	0.00130789	-9.4193e-05	0.00152806	0.0124296	-2.30537e-05	-0.0221742	0.000159994	-0.000880113	0.00137404	-1.58714e-05	0.000610923	0.000140554	-0.0182487	0.000101604	0.0133002	-6.70628e-05	0.000732624	0.000266223	-0.000197433	-1.24568e-05	-0.00290907	-0.00125521	-0.000417383	4.98147e-05	4.29359e-05	7.52239e-05	-0.000108861	-0.000114711	0.000110116	-0.000978514	8.2559e-05	-0.000126094	-0.0018746	-0.00116781	-4.8938e-05
LC.03.0348	0.0523945	0.0195455	-0.0111738	-0.000452593	3.41569e-06	-0.000103714	0.00167436	1.69934e-05	0.000249487	-4.11665e-06	0.000391575	-0.0276754	0.0101092	0.0159464	-1.70343e-05	-0.147296	-0.000342073	0.00421321	4.13883e-06	-0.0547599	0.000135255	2.06327e-05	3.60083e-05	4.25844e-05	0.012862	-0.000650679	-3.99694e-05	7.96049e-06	-0.000874756	0.00112815	0.105298	-0.000171687	-0.000543501	6.94661e-05	0.0387844	5.18079e-05	-4.19385e-05	0.000137862	-8.10895e-06	1.91907e-05	0.000187665	-7.81769e-06	6.08354e-05	0.0283408	1.91981e-05	-1.24692e-05	0.000293044	4.79678e-06	0.000198785
LC.03.0721	0.0523295	0.000447609	0.0401809	0.01351	1.75047e-05	0.00147113	0.0130764	7.98146e-05	0.000270454	-0.000340822	-0.00134729	0.0262378	-0.0192487	0.0434145	5.32273e-05	-0.128217	0.0146503	-0.000128493	-3.16552e-05	-0.000514136	-9.54553e-05	-2.93383e-06	0.000275396	-9.65611e-05	-0.00105348	-0.000112736	-0.00011723	0.000178656	-0.000230031	-2.74808e-05	-0.000366162	-8.8459e-06	0.000219221	5.56179e-05	-0.0533899	-0.000864031	-0.000236728	7.63091e-06	-1.77449e-06	2.47636e-06	-4.81418e-05	-1.13389e-06	-4.74691e-05	-0.107387	0.000335907	5.14284e-05	0.00124548	-0.000156525	4.71018e-05
LC.03.1088	0.0523152	-0.00268044	0.0349858	-0.000247881	7.79262e-06	2.06493e-05	-0.000939811	-3.71462e-05	3.34233e-05	0.00122291	-0.0417858	0.00284731	0.00121601	0.0397384	-2.0561e-05	-0.144421	-0.00606797	0.0037427	-5.51903e-05	0.0023798	1.87686e-05	-1.56292e-05	-0.0115382	-6.02292e-07	-0.000478488	0.000235219	2.28457e-05	2.08376e-05	-6.08312e-05	9.07239e-05	0.00274527	-0.000146612	-3.89761e-05	4.69873e-05	-0.0334326	-0.000253695	-0.000162282	-0.00110529	1.65049e-06	-1.3903e-05	-6.42025e-06	-1.96829e-06	-0.000253717	-0.0594721	-4.0231e-05	1.2976e-05	7.19175e-05	1.19136e-05	7.83036e-05
LC.03.0720	0.0523095	0.00125092	0.0190129	0.0683065	-7.22235e-05	-0.00031956	-0.00739032	9.50888e-05	-0.0423758	-7.82779e-05	0.00198664	0.0674217	0.0215068	-0.023306	6.21366e-05	0.000126384	0.0010216	-0.0311499	-7.39053e-06	0.00635569	1.10143e-05	-0.000194076	-0.000226352	0.000183861	1.5115e-05	-0.000824865	-0.0224632	0.00314292	0.0261459	-2.02586e-05	-3.08088e-06	9.20746e-06	0.051281	-0.148011	-0.00830116	-0.000184978	-0.000208345	3.64639e-06	-2.08444e-06	-8.05503e-06	-7.45092e-06	-1.74932e-06	0.000200889	-0.0308024	-3.32393e-05	4.80632e-05	-0.0160433	-1.64016e-05	-0.000124795
LC.03.0345	0.052221	-0.0184895	0.0678432	0.0582409	1.15298e-05	-0.0866574	0.0111598	2.04733e-05	-0.0181775	-0.000202588	-0.000599952	0.00330379	0.0321049	0.0185741	-2.97536e-05	0.000655531	0.0212711	-0.0279804	-0.000154623	-0.000724653	9.49679e-05	-3.15367e-06	0.000188136	0.000387241	0.000587884	0.0242484	5.34713e-05	4.15926e-05	-0.041229	-5.26618e-06	-0.0368291	-0.000172225	-0.000140528	3.00952e-05	0.00326479	-0.000597829	-3.26297e-05	7.24216e-06	-2.52605e-06	5.3995e-06	-0.000110768	7.66454e-06	-0.000117158	0.0325481	-4.66297e-05	-1.24924e-05	0.00123328	-4.27254e-05	-9.07215e-05
LC.03.0724	0.0521038	0.0004769	-0.0121706	0.0221958	-2.91784e-06	1.28378e-05	-0.0211086	0.0207484	0.0484616	-6.29463e-05	0.00408232	-0.00631885	2.17397e-05	-0.0255893	1.75483e-05	-0.0920687	-5.44054e-05	-0.0446648	7.02238e-05	-0.0153943	-2.1939e-05	-0.000156236	0.0201995	7.14099e-05	-0.00032152	-0.0139235	3.72541e-05	3.53013e-05	-0.00156913	-0.000243052	-0.0387195	-0.000225459	-3.17433e-05	-0.000176453	-0.00410041	0.0644007	0.000391524	-0.000335622	-1.17214e-05	1.82201e-05	-5.07139e-07	1.78852e-05	0.000703196	0.0161539	-4.48166e-05	0.00163369	0.00103712	9.7006e-05	-3.00592e-05
LC.03.0875	0.0517976	0.00670132	-0.012149	-0.0253651	3.5243e-07	0.000839153	0.0363899	-0.000246544	0.0148706	2.24897e-06	-0.0045723	0.00197407	-0.0467902	-0.0542786	0.000388668	-0.121928	0.00117702	-0.00343219	3.58864e-05	-0.000139592	-1.47482e-05	-0.000122551	0.00117198	7.34366e-05	1.58972e-05	-0.000996491	-0.000525585	-1.67146e-06	0.000484083	-0.000528956	-0.00342873	0.000138718	0.000233968	-0.00408706	0.0189224	0.0405617	-6.49133e-05	-5.63259e-05	2.03791e-07	2.31964e-05	0.0273968	-1.32074e-05	-1.01643e-05	0.00067569	-0.000220036	-6.81263e-05	0.0314184	-1.40764e-05	-1.09836e-05
LC.03.0294	0.0517678	-0.0082301	0.00011679	0.000142996	2.50299e-06	-9.07581e-06	-0.00021126	1.00806e-05	-0.0682677	-4.16775e-05	-9.47827e-05	-0.000239686	-5.53347e-05	-0.0134306	-5.24794e-07	-1.08021e-05	-4.32607e-05	-0.0165862	-3.05666e-05	-0.000392751	3.33443e-07	-9.82881e-07	-0.000232889	-1.75006e-05	-1.56253e-05	-0.000313241	-0.00010574	5.78175e-06	-0.000122385	-1.51075e-05	-5.28188e-05	-3.54916e-06	-1.47043e-05	0.000245384	-0.00230662	-2.50489e-05	1.497e-05	-7.24567e-06	4.60072e-07	3.04909e-06	9.32827e-06	5.27294e-07	-4.3209e-05	-0.000128474	3.32425e-06	2.27062e-08	-0.000185289	-1.88792e-05	-7.60048e-06
LC.03.1096	0.051608	-0.0219555	0.0106156	0.0459777	-0.000170617	0.000134046	-0.00478772	3.52508e-06	-0.00279321	-0.00010975	0.00147254	-0.0153919	-0.0268337	0.00502496	-0.000339313	-0.00078839	-0.00227842	-0.000277949	0.000391398	-0.00803749	0.000151073	-1.13571e-06	-0.00372404	0.00098804	-0.00353879	-0.000967727	-0.000257751	0.000151881	0.00330667	-0.00017037	0.000443327	0.00146893	0.0105235	7.15916e-05	0.0134487	0.0165153	9.73718e-05	4.70237e-05	0.00074782	-1.32153e-05	-0.000258149	0.00525158	7.65322e-05	-0.150626	0.000176681	-9.00052e-05	-0.00682475	3.22097e-05	0.000230788
LC.03.0495	0.0515766	0.00158627	0.0465959	0.0278153	-7.34021e-07	-6.75098e-05	-0.00237976	2.96684e-06	-0.00085382	-3.83724e-05	0.000890797	-0.003662	0.000413182	0.00574828	1.89607e-05	-0.142935	0.032958	-0.000188947	-3.20807e-05	-0.00115479	-3.91853e-05	-2.51303e-05	-0.000323921	-0.000712866	0.000211627	0.00852169	0.000137428	7.9669e-05	-0.0210706	1.35986e-05	0.0340164	-0.000361195	-0.000163125	0.000602456	-0.00571614	0.000345907	7.37395e-05	-3.22227e-08	-1.91795e-05	4.43144e-05	-7.11188e-05	-1.39525e-05	-0.000143138	-0.0708933	-2.29565e-05	1.4964e-05	0.000106538	1.582e-05	-1.96646e-05
LC.03.0286	0.0515402	-0.00260352	0.0498393	0.0114449	6.45897e-05	9.27365e-05	0.00169239	-0.000115978	0.000125957	0.00015753	-0.000977765	0.00748414	5.10958e-05	-0.0763112	6.04111e-05	-0.124952	0.0326321	0.0025082	-8.92771e-05	0.0010464	-3.04556e-06	-4.09883e-05	0.00511634	0.000199507	2.2345e-05	0.00020085	0.00153361	7.93334e-05	0.000631045	-0.000661805	0.0228324	0.000541162	0.000224213	6.38149e-05	-0.0474827	-7.55971e-05	-0.000126037	5.05517e-07	1.58829e-06	6.37923e-06	-0.0130602	-5.42537e-05	-0.000211843	-0.0937735	0.000111192	-3.80345e-05	0.000184115	-8.13372e-06	-0.000114012
LC.03.0845	0.0515036	-0.00603844	-0.0291204	-0.0270696	-2.96159e-05	0.0362867	0.0110266	0.0259184	0.026379	6.96539e-05	-0.000963721	0.0094257	-0.0199274	-0.0138501	-5.85623e-05	0.000505485	-2.60096e-05	0.0699258	5.09774e-05	0.00147914	9.35292e-05	0.000236891	0.000766163	0.000673258	0.000306746	0.0100868	-0.00163954	-0.00030003	0.000953568	0.000165957	-0.000594341	4.95205e-05	-0.0427991	0.000223446	-0.00654611	0.00068673	-0.000264934	-5.76173e-05	3.73992e-06	1.73717e-06	-3.92597e-05	2.73668e-05	-9.09637e-05	0.0503985	0.00025703	2.35446e-05	0.146824	-0.000196714	-3.31373e-06
LC.03.1040	0.0514083	-0.00226925	0.074975	-0.0586623	8.81874e-07	0.102377	-0.0126186	-0.000346975	0.000386538	-0.000127363	0.000414484	-0.00193879	-0.0184615	-0.00421648	2.00292e-06	-0.00740534	0.0350357	-0.00318064	-2.30435e-05	-0.0235138	0.00020437	-7.33738e-05	-0.000275452	5.3111e-05	8.47548e-05	0.00291195	-0.00024549	0.000441682	-0.000638453	8.29962e-05	0.000130233	0.000175405	2.6757e-05	4.34379e-05	0.00374067	0.000144432	-0.000141653	-0.000145125	2.68873e-06	2.74463e-06	0.000118905	3.1544e-06	0.000265265	-0.0435516	0.000105119	9.37972e-08	0.00502387	2.20573e-06	-3.24083e-05
LC.03.0415	0.0513445	0.000798876	-0.00723676	-0.00963014	-1.10285e-06	6.22253e-05	-0.000393391	-0.0142575	0.00204158	9.21691e-05	0.000167843	-0.0178672	0.0119505	-0.104337	0.000491577	-0.15247	-0.0418483	0.00345248	1.71711e-05	0.00121231	-1.80468e-06	-7.21711e-06	-0.000926298	0.000102591	0.000101948	0.00101287	0.000395062	-1.18715e-05	0.0154885	-3.503e-05	-2.02593e-05	-0.000158471	0.000826521	-0.000136594	0.00373334	0.000273139	-9.26218e-06	-4.78758e-06	4.94927e-08	-8.17588e-06	1.38455e-05	8.61603e-07	0.000107505	0.00108378	9.27569e-05	-5.89776e-06	-0.000116371	1.3428e-05	1.78638e-05
LC.03.0860	0.051319	0.00295282	-0.00175835	-0.00169281	-2.46609e-06	-1.6061e-05	0.000567596	-0.000101076	-0.099991	7.29885e-05	0.000372052	-0.0052565	0.000371461	-0.000256082	3.06995e-05	0.0507178	0.00426451	0.000366641	-4.81052e-05	-0.000783151	-5.1101e-05	-7.35597e-05	-4.03466e-06	-8.85972e-05	0.000672695	-0.000408013	-0.0319136	0.000169711	0.0674797	0.000167547	-0.000427893	-0.000243033	-0.130363	0.000102053	-0.0477794	-0.000226481	0.000279804	-0.00019607	2.15827e-06	0.000284834	-0.000123422	-4.84777e-05	-0.0274809	-0.00146469	-0.000560767	8.58585e-05	-0.000551302	6.10569e-05	0.000262168
LC.03.0412	0.0513076	0.0158808	-0.0117484	0.0157815	9.733e-06	-0.0175909	-0.00803946	-6.35182e-05	-0.0217831	-0.000202772	0.0231513	-0.0221292	0.000589183	-0.139388	-2.72095e-05	-0.120804	0.00286833	0.00160164	0.000310988	-0.0289504	5.10212e-05	-2.78254e-05	0.000264055	-1.36678e-05	0.000148872	0.000215991	0.000844695	-0.000408424	-0.000466546	0.000147619	0.0914803	-8.59964e-05	-0.000573668	2.45599e-05	0.0185768	6.00242e-05	-3.34237e-05	3.98631e-05	-1.731e-06	3.35652e-06	-8.68862e-06	1.60567e-05	4.6998e-05	-0.000526042	9.71003e-05	-6.75466e-06	-0.000248015	4.25888e-05	7.2876e-05
LC.03.0264	0.051143	-0.0159433	-0.0112413	0.000928735	2.60209e-05	0.000199585	0.0188029	0.0331762	0.0808142	0.00111148	4.76023e-05	0.00558235	0.000550262	0.0599982	0.00101066	0.022619	-0.0127972	0.0329582	-9.23072e-05	-0.00226521	-1.37771e-05	-6.91032e-05	-0.0114678	0.000436438	0.00136647	0.0187195	0.0464878	-0.000209752	-0.0459276	-0.000130224	-0.00080215	-0.0176776	-0.000225584	0.000331344	-0.0162457	-0.027223	0.00124326	-0.00035455	-6.32161e-05	0.000115414	-0.000292187	-1.68208e-05	-0.000772701	-0.00592244	0.000282037	-0.000120383	0.00228577	-0.000296591	-7.80831e-05
LC.03.0044	0.0505562	0.00415468	-0.0483177	-0.0247329	0.000251061	0.000573804	0.018075	-5.21113e-06	-0.114714	0.000132969	-4.77563e-05	-0.0136391	-0.00222563	0.00792587	1.58152e-06	-0.0165132	-0.00104184	0.0387666	0.000290434	0.000262868	2.10633e-06	3.77723e-05	-0.000170915	0.000195744	5.11943e-05	-0.0385628	0.00429933	-0.000109787	2.46541e-05	0.0306932	-0.0470777	-0.000605985	0.000124719	-0.000238161	-0.0305977	0.000428759	-7.37925e-05	8.7994e-06	-3.2179e-06	-4.35013e-05	1.57248e-05	-1.30495e-05	0.00101459	0.000784052	-9.7905e-05	3.5638e-05	0.000354827	-6.09422e-06	-0.00213519
LC.03.0351	0.0505251	0.00561131	0.000483181	-0.000240106	1.0183e-05	-0.000110039	0.000698323	-0.000400337	-0.00616697	-7.12908e-05	-9.78679e-05	-0.0234332	0.00321374	-0.0916021	1.08956e-05	-0.169109	-0.00349961	0.00255996	3.45835e-06	-0.00125482	3.9883e-05	2.36961e-05	-0.000428453	0.00025712	0.000678856	0.0249371	7.17467e-05	-8.03914e-05	1.95595e-05	2.84531e-05	0.0478456	-0.00160222	0.000327825	-3.23541e-05	0.0169525	3.85587e-05	-4.69617e-07	-4.75516e-06	8.13383e-07	-1.75411e-05	-6.70375e-07	1.31846e-05	-0.000153369	0.00162199	5.01394e-05	-1.18204e-05	0.000553627	-7.36061e-05	1.38504e-05
[truncated: 1,490 more rows]
[truncated: 51 more columns]
